# Supplementary material for: Classification of Genes Based on Age-Related Differential Expression in Breast Cancer
Source: PubMed Central journal article supplement — Genomics Inform. 2017 Dec 29;15(4):156–61. doi: 10.5808/GI.2017.15.4.156 (PMC5769863; doi:10.5808/gi.2017.15.4.156), 2017-12-29
Supplement: gi-15-4-156-suppl1.pdf [file gi-15-4-156-suppl1.pdf]

**Supplementary Table 1.** Table of 16 gene classes based on age-specific expression

| Gene name   Entrez ID | Gene class |
|-----------------------|------------|
| AASS 10157            | A1         |
| ABCA10 10349          | A1         |
| ABCA5 23461           | A1         |
| ABCB1 5243            | A1         |
| ACBD3 64746           | A1         |
| ACCS 84680            | A1         |
| ACVR2A 92             | A1         |
| ADAM33 80332          | A1         |
| ADAMTS5 11096         | A1         |
| ADAR 103              | A1         |
| ADIPOR1 51094         | A1         |
| ALDH1A2 8854          | A1         |
| AMOTL1 154810         | A1         |
| AMOTL2 51421          | A1         |
| AMT 275               | A1         |
| ANAPC4 29945          | A1         |
| ANKRD29 147463        | A1         |
| ANXA1 301             | A1         |
| AP1S1 1174            | A1         |
| APBB1 322             | A1         |
| APCDD1 147495         | A1         |
| APOO 79135            | A1         |
| ARF1 375              | A1         |
| ARHGAP19 84986        | A1         |
| ARHGEF10 9639         | A1         |
| ARID5B 84159          | A1         |
| ARRB1 408             | A1         |
| ASB1 51665            | A1         |
| ATP6AP1 537           | A1         |
| ATP6V0B 533           | A1         |
| AUH 549               | A1         |
| BAI3 577              | A1         |
| BBS2 583              | A1         |
| BCL2L2 599            | A1         |
| BCL6 604              | A1         |
| BOLA2 552900          | A1         |
| C16orf59 80178        | A1         |
| C16orf86 388284       | A1         |
| C17orf108 201229      | A1         |
| C17orf48 56985        | A1         |
| C1QTNF9B 387911       | A1         |
| C1orf190 541468       | A1         |
| C1orf31 388753        | A1         |
| C20orf194 25943       | A1         |
| C21orf34 388815       | A1         |
| C2orf40 84417         | A1         |
| C2orf67 151050        | A1         |
| C4orf49 84709         | A1         |

|                 |    |
|-----------------|----|
| C5orf4 10826    | A1 |
| C5orf53 492311  | A1 |
| C6orf129 154467 | A1 |
| C8orf79 57604   | A1 |
| CACHD1 57685    | A1 |
| CALCOCO1 57658  | A1 |
| CAPN11 11131    | A1 |
| CAPZA1 829      | A1 |
| CBX3 11335      | A1 |
| CBX7 23492      | A1 |
| CC2D2A 57545    | A1 |
| CCDC46 201134   | A1 |
| CCDC93 54520    | A1 |
| CD200 4345      | A1 |
| CD276 80381     | A1 |
| CDADC1 81602    | A1 |
| CDC14B 8555     | A1 |
| CEP68 23177     | A1 |
| CES2 8824       | A1 |
| CFL1 1072       | A1 |
| CHL1 10752      | A1 |
| CIT 11113       | A1 |
| CLCN6 1185      | A1 |
| CLDN11 5010     | A1 |
| CLDN19 149461   | A1 |
| CNTNAP3 79937   | A1 |
| COL17A1 1308    | A1 |
| CRIM1 51232     | A1 |
| CX3CL1 6376     | A1 |
| CYP2U1 113612   | A1 |
| DAB2IP 153090   | A1 |
| DCP1A 55802     | A1 |
| DDX26B 203522   | A1 |
| DFNB59 494513   | A1 |
| DLGAP2 9228     | A1 |
| DLK2 65989      | A1 |
| DMD 1756        | A1 |
| DNAH1 25981     | A1 |
| DNAJC18 202052  | A1 |
| DNAJC27 51277   | A1 |
| DOCK1 1793      | A1 |
| DPY19L2 283417  | A1 |
| DPY30 84661     | A1 |
| DPYSL2 1808     | A1 |
| DST 667         | A1 |
| DTYMK 1841      | A1 |
| DUSP6 1848      | A1 |
| EDN3 1908       | A1 |
| EDNRB 1910      | A1 |
| EEPD1 80820     | A1 |
| EFHA2 286097    | A1 |

|                |    |
|----------------|----|
| EIF2AK1 27102  | A1 |
| EIF3L 51386    | A1 |
| ERCC6L 54821   | A1 |
| ESD 2098       | A1 |
| EVC2 132884    | A1 |
| EZH1 2145      | A1 |
| F3 2152        | A1 |
| FAM122A 116224 | A1 |
| FAM126A 84668  | A1 |
| FAM13C 220965  | A1 |
| FAM189A2 9413  | A1 |
| FAM82A1 151393 | A1 |
| FBXO31 79791   | A1 |
| FGF1 2246      | A1 |
| FIGF 2277      | A1 |
| FLJ10038 55056 | A1 |
| FLJ13197 79667 | A1 |
| FOXO4 4303     | A1 |
| FXYD1 5348     | A1 |
| GEMIN6 79833   | A1 |
| GGPS1 9453     | A1 |
| GNAL 2774      | A1 |
| GNE 10020      | A1 |
| GPRASP1 9737   | A1 |
| GPRASP2 114928 | A1 |
| GRIA4 2893     | A1 |
| GSPT2 23708    | A1 |
| H2AFY 9555     | A1 |
| H2AFZ 3015     | A1 |
| H3F3A 3020     | A1 |
| HERC2P2 400322 | A1 |
| HLF 3131       | A1 |
| HNRNPAB 3182   | A1 |
| HNRNPF 3185    | A1 |
| HNRNPL 3191    | A1 |
| HNRNPU 3192    | A1 |
| HOXA2 3199     | A1 |
| HOXA3 3200     | A1 |
| HOXA4 3201     | A1 |
| HOXA5 3202     | A1 |
| HOXA6 3203     | A1 |
| HYMAI 57061    | A1 |
| IGSF10 285313  | A1 |
| IL11RA 3590    | A1 |
| IL17RD 54756   | A1 |
| IL33 90865     | A1 |
| ING3 54556     | A1 |
| INPP1 3628     | A1 |
| INTS7 25896    | A1 |
| ISM1 140862    | A1 |
| ITM2A 9452     | A1 |

|                        |    |
|------------------------|----|
| KCNE1 3753             | A1 |
| KCTD12 115207          | A1 |
| KIAA1614 57710         | A1 |
| KIRREL 55243           | A1 |
| KLF9 687               | A1 |
| KLHDC1 122773          | A1 |
| KLHL21 9903            | A1 |
| KLHL29 114818          | A1 |
| KLHL3 26249            | A1 |
| KL 9365                | A1 |
| LCA5 167691            | A1 |
| LCAT 3931              | A1 |
| LDB2 9079              | A1 |
| LETMD1 25875           | A1 |
| LGR4 55366             | A1 |
| LIFR 3977              | A1 |
| LIMS2 55679            | A1 |
| LMBRD1 55788           | A1 |
| LOC100132707 100132707 | A1 |
| LOC134466 134466       | A1 |
| LOC285830 285830       | A1 |
| LOC339290 339290       | A1 |
| LOC399959 399959       | A1 |
| LOC728264 728264       | A1 |
| LPCAT2 54947           | A1 |
| LRCH1 23143            | A1 |
| LRIG3 121227           | A1 |
| LRP4 4038              | A1 |
| LRRC3B 116135          | A1 |
| LRRTM2 26045           | A1 |
| LSM4 25804             | A1 |
| LUZP1 7798             | A1 |
| MAB21L1 4081           | A1 |
| MAGI1 9223             | A1 |
| MAMDC2 256691          | A1 |
| MAML2 84441            | A1 |
| MANF 7873              | A1 |
| MAPKBP1 23005          | A1 |
| MATN2 4147             | A1 |
| MAZ 4150               | A1 |
| MBOAT7 79143           | A1 |
| MEG3 55384             | A1 |
| MEIS2 4212             | A1 |
| METTL7A 25840          | A1 |
| MICAL3 57553           | A1 |
| MID1 4281              | A1 |
| MLF1IP 79682           | A1 |
| MME 4311               | A1 |
| MOBKL2B 79817          | A1 |
| MOBKL2C 148932         | A1 |
| MPDZ 8777              | A1 |

|                   |    |
|-------------------|----|
| MTMR10 54893      | A1 |
| MYLK 4638         | A1 |
| N4BP2L1 90634     | A1 |
| NAA20 51126       | A1 |
| NAB1 4664         | A1 |
| NAP1L5 266812     | A1 |
| NBLA00301 79804   | A1 |
| NCRNA00086 399668 | A1 |
| NCRNA00087 644596 | A1 |
| NDEL1 81565       | A1 |
| NDRG2 57447       | A1 |
| NEIL3 55247       | A1 |
| NFAT5 10725       | A1 |
| NGFR 4804         | A1 |
| NISCH 11188       | A1 |
| NPHP3 27031       | A1 |
| NR2C1 7181        | A1 |
| NR3C1 2908        | A1 |
| NR3C2 4306        | A1 |
| NRIP2 83714       | A1 |
| NTF4 4909         | A1 |
| OR2A1 346528      | A1 |
| OR2A9P 441295     | A1 |
| OXTR 5021         | A1 |
| PAFAH1B3 5050     | A1 |
| PAK3 5063         | A1 |
| PAK7 57144        | A1 |
| PAMR1 25891       | A1 |
| PAR-SN 347746     | A1 |
| PARK2 5071        | A1 |
| PARP1 142         | A1 |
| PCDHGB7 56099     | A1 |
| PCNX 22990        | A1 |
| PDE1C 5137        | A1 |
| PDGFD 80310       | A1 |
| PDLIM4 8572       | A1 |
| PELI2 57161       | A1 |
| PER1 5187         | A1 |
| PHF10 55274       | A1 |
| PHF17 79960       | A1 |
| PIGU 128869       | A1 |
| PIK3R1 5295       | A1 |
| PKD2 5311         | A1 |
| PKMYT1 9088       | A1 |
| PLAGL1 5325       | A1 |
| PLEKHH2 130271    | A1 |
| PLEKHM3 389072    | A1 |
| PLK1S1 55857      | A1 |
| PLSCR4 57088      | A1 |
| PMM2 5373         | A1 |
| PNMAL2 57469      | A1 |

|                 |    |
|-----------------|----|
| PNRC1 10957     | A1 |
| POU6F1 5463     | A1 |
| PPAP2B 8613     | A1 |
| PPIAL4C 653598  | A1 |
| PPL 5493        | A1 |
| PPM1F 9647      | A1 |
| PPP4C 5531      | A1 |
| PPP4R1L 55370   | A1 |
| PRCD 768206     | A1 |
| PRDX1 5052      | A1 |
| PRIMA1 145270   | A1 |
| PRNP 5621       | A1 |
| PROS1 5627      | A1 |
| PRX 57716       | A1 |
| PSENE 55851     | A1 |
| PSKH1 5681      | A1 |
| PSMA5 5686      | A1 |
| PSMC4 5704      | A1 |
| PSMD14 10213    | A1 |
| PTBP1 5725      | A1 |
| PTCH1 5727      | A1 |
| PTPN21 11099    | A1 |
| PYCR1 5831      | A1 |
| PZP 5858        | A1 |
| RAB11FIP2 22841 | A1 |
| RAB8A 4218      | A1 |
| RABIF 5877      | A1 |
| RAPGEF2 9693    | A1 |
| RAPGEF3 10411   | A1 |
| RASSF9 9182     | A1 |
| RBM9 23543      | A1 |
| RBMS2 5939      | A1 |
| RCBTB2 1102     | A1 |
| REV1 51455      | A1 |
| RGNEF 64283     | A1 |
| RGN 9104        | A1 |
| RHOJ 57381      | A1 |
| RND3 390        | A1 |
| RNF180 285671   | A1 |
| RNF187 149603   | A1 |
| RNF214 257160   | A1 |
| RNF38 152006    | A1 |
| ROBO3 64221     | A1 |
| RPS6KA3 6197    | A1 |
| RRN3P1 730092   | A1 |
| RUNDC3B 154661  | A1 |
| RUSC1 23623     | A1 |
| SAE1 10055      | A1 |
| SAMD5 389432    | A1 |
| SASH1 23328     | A1 |
| SAV1 60485      | A1 |

|                |    |
|----------------|----|
| SCN2B 6327     | A1 |
| SCN3A 6328     | A1 |
| SCN4B 6330     | A1 |
| SEC14L1 6397   | A1 |
| SEMA3D 223117  | A1 |
| SH3BGRL2 83699 | A1 |
| SKA3 221150    | A1 |
| SLC20A1 6574   | A1 |
| SLC25A44 9673  | A1 |
| SLC27A1 376497 | A1 |
| SLC27A6 28965  | A1 |
| SLC35A2 7355   | A1 |
| SMC6 79677     | A1 |
| SMYD4 114826   | A1 |
| SNCA 6622      | A1 |
| SOBP 55084     | A1 |
| SPRY2 10253    | A1 |
| SRP9 6726      | A1 |
| SRPX 8406      | A1 |
| SSPN 8082      | A1 |
| SSTR1 6751     | A1 |
| STAT5A 6776    | A1 |
| STAT5B 6777    | A1 |
| SYNE2 23224    | A1 |
| SYNM 23336     | A1 |
| TBC1D4 9882    | A1 |
| TBRG1 84897    | A1 |
| TCEAL7 56849   | A1 |
| TCP11L2 255394 | A1 |
| TDRD10 126668  | A1 |
| TDRD6 221400   | A1 |
| TEF 7008       | A1 |
| TGFBR3 7049    | A1 |
| THRB 7068      | A1 |
| THSD1 55901    | A1 |
| TIMM17A 10440  | A1 |
| TINAGL1 64129  | A1 |
| TLE4 7091      | A1 |
| TMEM220 388335 | A1 |
| TMEM63B 55362  | A1 |
| TMEM8A 58986   | A1 |
| TMTC1 83857    | A1 |
| TPO 7173       | A1 |
| TRIM11 81559   | A1 |
| TRIM59 286827  | A1 |
| TRPC1 7220     | A1 |
| TRPC6 7225     | A1 |
| TSC1 7248      | A1 |
| TSHZ2 128553   | A1 |
| TSLP 85480     | A1 |
| TSPYL2 64061   | A1 |

|                |    |
|----------------|----|
| TSTA3 7264     | A1 |
| TTC28 23331    | A1 |
| TUBA1C 84790   | A1 |
| TUBE1 51175    | A1 |
| TUBG2 27175    | A1 |
| USP44 84101    | A1 |
| UTRN 7402      | A1 |
| VAMP2 6844     | A1 |
| WASF2 10163    | A1 |
| WBP4 11193     | A1 |
| WDR86 349136   | A1 |
| WHAMML2 440253 | A1 |
| YAP1 10413     | A1 |
| ZBTB4 57659    | A1 |
| ZDHHC17 23390  | A1 |
| ZFP36L2 678    | A1 |
| ZNF132 7691    | A1 |
| ZNF204P 7754   | A1 |
| ZNF280D 54816  | A1 |
| ZNF391 346157  | A1 |
| ZNF502 91392   | A1 |
| ZNF660 285349  | A1 |
| ZNF781 163115  | A1 |
| ? 10431        | A2 |
| ? 653553       | A2 |
| A1BG 1         | A2 |
| AADAC 13       | A2 |
| ABCA1 19       | A2 |
| ABCA8 10351    | A2 |
| ABCB10 23456   | A2 |
| ABCB8 11194    | A2 |
| ABCB9 23457    | A2 |
| ABCC5 10057    | A2 |
| ABCC6 368      | A2 |
| ABCD2 225      | A2 |
| ABCD3 5825     | A2 |
| ABCD4 5826     | A2 |
| ABCF1 23       | A2 |
| ABCF3 55324    | A2 |
| ABCG1 9619     | A2 |
| ABHD12 26090   | A2 |
| ABHD14B 84836  | A2 |
| ABHD1 84696    | A2 |
| ABHD6 57406    | A2 |
| ABL1 25        | A2 |
| ABL2 27        | A2 |
| ABLIM1 3983    | A2 |
| ABLIM3 22885   | A2 |
| ABR 29         | A2 |
| ABTB1 80325    | A2 |
| ACACB 32       | A2 |



|                 |    |
|-----------------|----|
| ACAD11 84129    | A2 |
| ACADS 35        | A2 |
| ACADV 37        | A2 |
| ACAT2 39        | A2 |
| ACBD4 79777     | A2 |
| ACOT7 11332     | A2 |
| ACOT8 10005     | A2 |
| ACPI 52         | A2 |
| ACP2 53         | A2 |
| ACSBG2 81616    | A2 |
| ACSL1 2180      | A2 |
| ACSL5 51703     | A2 |
| ACSM5 54988     | A2 |
| ACSS2 55902     | A2 |
| ACTA2 59        | A2 |
| ACTB 60         | A2 |
| ACTG1 71        | A2 |
| ACTL6A 86       | A2 |
| ACTR1B 10120    | A2 |
| ACTR2 10097     | A2 |
| ACTR3 10096     | A2 |
| ACVR1C 130399   | A2 |
| ADAD2 161931    | A2 |
| ADAM12 8038     | A2 |
| ADAM15 8751     | A2 |
| ADAM19 8728     | A2 |
| ADAM8 101       | A2 |
| ADAMTS12 81792  | A2 |
| ADAMTS14 140766 | A2 |
| ADAMTS18 170692 | A2 |
| ADAMTS1 9510    | A2 |
| ADAMTS3 9508    | A2 |
| ADAMTS6 11174   | A2 |
| ADAMTS7 11173   | A2 |
| ADAMTS9 56999   | A2 |
| ADAMTSL2 9719   | A2 |
| ADAP1 11033     | A2 |
| ADARB1 104      | A2 |
| ADAT2 134637    | A2 |
| ADCK2 90956     | A2 |
| ADCK5 203054    | A2 |
| ADCY4 196883    | A2 |
| ADCY5 111       | A2 |
| ADCY6 112       | A2 |
| ADCYAP1R1 117   | A2 |
| ADC 113451      | A2 |
| ADD1 118        | A2 |
| ADD3 120        | A2 |
| ADH1A 124       | A2 |
| ADH1B 125       | A2 |
| ADH4 127        | A2 |

|               |    |
|---------------|----|
| ADH5 128      | A2 |
| ADHFE1 137872 | A2 |
| ADIPOQ 9370   | A2 |
| ADORA2A 135   | A2 |
| ADORA3 140    | A2 |
| ADPRHL2 54936 | A2 |
| ADRA1A 148    | A2 |
| ADRA2A 150    | A2 |
| ADRB2 154     | A2 |
| ADRBK2 157    | A2 |
| ADRM1 11047   | A2 |
| ADSS 159      | A2 |
| AEBP1 165     | A2 |
| AFF1 4299     | A2 |
| AG2 387763    | A2 |
| AGAP11 119385 | A2 |
| AGER 177      | A2 |
| AGFG2 3268    | A2 |
| AGPAT2 10555  | A2 |
| AGR3 155465   | A2 |
| AGTRAP 57085  | A2 |
| AGXT2L2 85007 | A2 |
| AHCTF1 25909  | A2 |
| AHCY 191      | A2 |
| AHDC1 27245   | A2 |
| AHNAK 79026   | A2 |
| AHSA1 10598   | A2 |
| AIF1L 83543   | A2 |
| AIFM1 9131    | A2 |
| AIG1 51390    | A2 |
| AIMP2 7965    | A2 |
| AK3 50808     | A2 |
| AK5 26289     | A2 |
| AKAP11 11215  | A2 |
| AKAP13 11214  | A2 |
| AKAP1 8165    | A2 |
| AKAP2 11217   | A2 |
| AKAP3 10566   | A2 |
| AKAP5 9495    | A2 |
| AKAP7 9465    | A2 |
| AKR1C1 1645   | A2 |
| AKR1C2 1646   | A2 |
| AKR1C3 8644   | A2 |
| AKT1 207      | A2 |
| ALAD 210      | A2 |
| ALDH18A1 5832 | A2 |
| ALDH1A1 216   | A2 |
| ALDH1A3 220   | A2 |
| ALDH1B1 219   | A2 |
| ALDH1L1 10840 | A2 |
| ALDH2 217     | A2 |

|                |    |
|----------------|----|
| ALDH3A2 224    | A2 |
| ALDH7A1 501    | A2 |
| ALDOC 230      | A2 |
| ALG11 440138   | A2 |
| ALG1 56052     | A2 |
| ALG3 10195     | A2 |
| ALG6 29929     | A2 |
| ALKBH3 221120  | A2 |
| ALKBH6 84964   | A2 |
| ALS2CR4 65062  | A2 |
| ALS2CR8 79800  | A2 |
| ALX4 60529     | A2 |
| AMIGO1 57463   | A2 |
| AMIGO3 386724  | A2 |
| AMMECR1 9949   | A2 |
| AMZ2 51321     | A2 |
| ANAPC11 51529  | A2 |
| ANGEL2 90806   | A2 |
| ANGPTL1 9068   | A2 |
| ANGPTL6 83854  | A2 |
| ANGPTL7 10218  | A2 |
| ANG 283        | A2 |
| ANK2 287       | A2 |
| ANKDD1A 348094 | A2 |
| ANKFY1 51479   | A2 |
| ANKK1 255239   | A2 |
| ANKRD11 29123  | A2 |
| ANKRD22 118932 | A2 |
| ANKRD36 375248 | A2 |
| ANKRD40 91369  | A2 |
| ANKRD53 79998  | A2 |
| ANKRD58 347454 | A2 |
| ANKRD5 63926   | A2 |
| ANKRD6 22881   | A2 |
| ANKS1A 23294   | A2 |
| ANLN 54443     | A2 |
| ANO2 57101     | A2 |
| ANO9 338440    | A2 |
| ANP32E 81611   | A2 |
| ANXA11 311     | A2 |
| ANXA3 306      | A2 |
| ANXA6 309      | A2 |
| AP1G2 8906     | A2 |
| AP1M2 10053    | A2 |
| AP1S3 130340   | A2 |
| AP2A2 161      | A2 |
| AP2M1 1173     | A2 |
| AP2S1 1175     | A2 |
| AP3B1 8546     | A2 |
| AP3D1 8943     | A2 |
| AP4M1 9179     | A2 |

|                 |    |
|-----------------|----|
| APBA1 320       | A2 |
| APCDD1L 164284  | A2 |
| APEH 327        | A2 |
| APEX2 27301     | A2 |
| APH1A 51107     | A2 |
| APITD1 378708   | A2 |
| APLF 200558     | A2 |
| APOA1BP 128240  | A2 |
| APOB48R 55911   | A2 |
| APOBEC3C 27350  | A2 |
| APOB 338        | A2 |
| APOC2 344       | A2 |
| APPL2 55198     | A2 |
| APTX 54840      | A2 |
| AQP1 358        | A2 |
| AQP7P1 375719   | A2 |
| AQP7P3 441432   | A2 |
| AQPEP 206338    | A2 |
| ARAP1 116985    | A2 |
| ARAP3 64411     | A2 |
| ARC 23237       | A2 |
| ARF3 377        | A2 |
| ARF4 378        | A2 |
| ARF5 381        | A2 |
| ARFGAP1 55738   | A2 |
| ARFIP2 23647    | A2 |
| ARG2 384        | A2 |
| ARGLU1 55082    | A2 |
| ARHGAP11A 9824  | A2 |
| ARHGAP20 57569  | A2 |
| ARHGAP21 57584  | A2 |
| ARHGAP23 57636  | A2 |
| ARHGAP24 83478  | A2 |
| ARHGAP26 23092  | A2 |
| ARHGAP29 9411   | A2 |
| ARHGAP32 9743   | A2 |
| ARHGAP39 80728  | A2 |
| ARHGAP42 143872 | A2 |
| ARHGAP5 394     | A2 |
| ARHGAP6 395     | A2 |
| ARHGDIB 397     | A2 |
| ARHGEF11 9826   | A2 |
| ARHGEF17 9828   | A2 |
| ARHGEF37 389337 | A2 |
| ARHGEF6 9459    | A2 |
| ARHGEF7 8874    | A2 |
| ARID1B 57492    | A2 |
| ARID3A 1820     | A2 |
| ARID4A 5926     | A2 |
| ARID5A 10865    | A2 |
| ARL10 285598    | A2 |

|               |    |
|---------------|----|
| ARL11 115761  | A2 |
| ARL1 400      | A2 |
| ARL2 402      | A2 |
| ARL3 403      | A2 |
| ARL4A 10124   | A2 |
| ARL4C 10123   | A2 |
| ARL6IP1 23204 | A2 |
| ARL8A 127829  | A2 |
| ARL8B 55207   | A2 |
| ARMC10 83787  | A2 |
| ARMC1 55156   | A2 |
| ARMC6 93436   | A2 |
| ARMC7 79637   | A2 |
| ARMCX1 51309  | A2 |
| ARNT2 9915    | A2 |
| ARPC1B 10095  | A2 |
| ARPC2 10109   | A2 |
| ARPC3 10094   | A2 |
| ARPC4 10093   | A2 |
| ARPC5L 81873  | A2 |
| ARPC5 10092   | A2 |
| ARRDC2 27106  | A2 |
| ARRDC3 57561  | A2 |
| ARSB 411      | A2 |
| ARSI 340075   | A2 |
| ART4 420      | A2 |
| ARV1 64801    | A2 |
| ASB13 79754   | A2 |
| ASF1B 55723   | A2 |
| ASNA1 439     | A2 |
| ASPH 444      | A2 |
| ASPM 259266   | A2 |
| ASPN 54829    | A2 |
| ASPRV1 151516 | A2 |
| ASPSCR1 79058 | A2 |
| ASTN1 460     | A2 |
| ASXL1 171023  | A2 |
| ATAD2 29028   | A2 |
| ATF3 467      | A2 |
| ATF5 22809    | A2 |
| ATF6B 1388    | A2 |
| ATF7 11016    | A2 |
| ATG16L1 55054 | A2 |
| ATG2B 55102   | A2 |
| ATG4C 84938   | A2 |
| ATG4D 84971   | A2 |
| ATG9B 285973  | A2 |
| ATIC 471      | A2 |
| ATL1 51062    | A2 |
| ATM 472       | A2 |
| ATOH8 84913   | A2 |

|                 |    |
|-----------------|----|
| ATOX1 475       | A2 |
| ATP13A1 57130   | A2 |
| ATP13A2 23400   | A2 |
| ATP1B2 482      | A2 |
| ATP2B4 493      | A2 |
| ATP2C2 9914     | A2 |
| ATP5C1 509      | A2 |
| ATP6AP2 10159   | A2 |
| ATP6V1D 51382   | A2 |
| ATP6V1F 9296    | A2 |
| ATP7B 540       | A2 |
| ATP8B1 5205     | A2 |
| ATPIF1 93974    | A2 |
| ATRIP 84126     | A2 |
| ATXN1L 342371   | A2 |
| ATXN3 4287      | A2 |
| ATXN7L3 56970   | A2 |
| AUP1 550        | A2 |
| AURKAPS1 6791   | A2 |
| AURKA 6790      | A2 |
| AURKB 9212      | A2 |
| AVPI1 60370     | A2 |
| AVPR1A 552      | A2 |
| AXIN1 8312      | A2 |
| AXIN2 8313      | A2 |
| AZI2 64343      | A2 |
| B3GALNT1 8706   | A2 |
| B3GALNT2 148789 | A2 |
| B3GALT1 8708    | A2 |
| B3GALT2 8707    | A2 |
| B3GAT3 26229    | A2 |
| B3GNT1 11041    | A2 |
| B3GNT4 79369    | A2 |
| B4GALNT3 283358 | A2 |
| B4GALT1 2683    | A2 |
| B4GALT3 8703    | A2 |
| B4GALT4 8702    | A2 |
| B4GALT6 9331    | A2 |
| BACH2 60468     | A2 |
| BAI2 576        | A2 |
| BAIAP2L1 55971  | A2 |
| BAIAP2 10458    | A2 |
| BAK1 578        | A2 |
| BANF1 8815      | A2 |
| BASP1 10409     | A2 |
| BAT5 7920       | A2 |
| BAX 581         | A2 |
| BAZ2B 29994     | A2 |
| BBC3 27113      | A2 |
| BBOX1 8424      | A2 |
| BBS10 79738     | A2 |

|                |    |
|----------------|----|
| BBS12 166379   | A2 |
| BBS7 55212     | A2 |
| BCKDK 10295    | A2 |
| BCL2L12 83596  | A2 |
| BCL2L1 598     | A2 |
| BCL3 602       | A2 |
| BCL9 607       | A2 |
| BCOR 54880     | A2 |
| BDH2 56898     | A2 |
| BDNFOS 497258  | A2 |
| BEGAIN 57596   | A2 |
| BEND3 57673    | A2 |
| BEND5 79656    | A2 |
| BEND7 222389   | A2 |
| BFAR 51283     | A2 |
| BGN 633        | A2 |
| BICD2 23299    | A2 |
| BIK 638        | A2 |
| BIRC5 332      | A2 |
| BIVM 54841     | A2 |
| BLCAP 10904    | A2 |
| BLNK 29760     | A2 |
| BLOC1S2 282991 | A2 |
| BLOC1S3 388552 | A2 |
| BLZF1 8548     | A2 |
| BMI1 648       | A2 |
| BMP8A 353500   | A2 |
| BMPER 168667   | A2 |
| BMS1P5 399761  | A2 |
| BMX 660        | A2 |
| BNIP1 662      | A2 |
| BNIP2 663      | A2 |
| BNIP3L 665     | A2 |
| BOC 91653      | A2 |
| BOD1L 259282   | A2 |
| BOK 666        | A2 |
| BOLA1 51027    | A2 |
| BOLA3 388962   | A2 |
| BOP1 23246     | A2 |
| BPNT1 10380    | A2 |
| BRCA1 672      | A2 |
| BRCC3 79184    | A2 |
| BRI3BP 140707  | A2 |
| BRIX1 55299    | A2 |
| BRMS1 25855    | A2 |
| BSCL2 26580    | A2 |
| BST2 684       | A2 |
| BTAF1 9044     | A2 |
| BTBD10 84280   | A2 |
| BTBD11 121551  | A2 |
| BTBD7 55727    | A2 |

|                  |    |
|------------------|----|
| BTBD8 284697     | A2 |
| BTF3L4 91408     | A2 |
| BTN2A1 11120     | A2 |
| BTN2A3 54718     | A2 |
| BTNL9 153579     | A2 |
| BUB1B 701        | A2 |
| BUB1 699         | A2 |
| BUB3 9184        | A2 |
| BUD13 84811      | A2 |
| BUD31 8896       | A2 |
| BZRAP1 9256      | A2 |
| BZW2 28969       | A2 |
| C10orf10 11067   | A2 |
| C10orf116 10974  | A2 |
| C10orf11 83938   | A2 |
| C10orf128 170371 | A2 |
| C10orf18 54906   | A2 |
| C10orf35 219738  | A2 |
| C10orf46 143384  | A2 |
| C10orf4 118924   | A2 |
| C10orf50 645528  | A2 |
| C10orf54 64115   | A2 |
| C10orf57 80195   | A2 |
| C10orf58 84293   | A2 |
| C10orf95 79946   | A2 |
| C11orf10 746     | A2 |
| C11orf24 53838   | A2 |
| C11orf2 738      | A2 |
| C11orf48 79081   | A2 |
| C11orf49 79096   | A2 |
| C11orf61 79684   | A2 |
| C11orf63 79864   | A2 |
| C11orf66 220004  | A2 |
| C11orf82 220042  | A2 |
| C11orf83 790955  | A2 |
| C11orf84 144097  | A2 |
| C11orf95 65998   | A2 |
| C12orf11 55726   | A2 |
| C12orf23 90488   | A2 |
| C12orf26 84190   | A2 |
| C12orf32 83695   | A2 |
| C12orf34 84915   | A2 |
| C12orf43 64897   | A2 |
| C12orf44 60673   | A2 |
| C12orf52 84934   | A2 |
| C12orf68 387856  | A2 |
| C12orf70 341346  | A2 |
| C13orf34 79866   | A2 |
| C13orf36 400120  | A2 |
| C13orf37 440145  | A2 |
| C14orf118 55668  | A2 |



|                     |    |
|---------------------|----|
| C14orf119 55017     | A2 |
| C14orf128 84837     | A2 |
| C14orf129 51527     | A2 |
| C14orf132 56967     | A2 |
| C14orf142 84520     | A2 |
| C14orf149 112849    | A2 |
| C14orf156 81892     | A2 |
| C14orf159 80017     | A2 |
| C14orf169 79697     | A2 |
| C14orf174 161394    | A2 |
| C14orf180 400258    | A2 |
| C14orf1 11161       | A2 |
| C14orf64 388011     | A2 |
| C14orf80 283643     | A2 |
| C15orf17 57184      | A2 |
| C15orf21 283651     | A2 |
| C15orf23 90417      | A2 |
| C15orf29 79768      | A2 |
| C15orf32 145858     | A2 |
| C15orf40 123207     | A2 |
| C15orf42 90381      | A2 |
| C15orf51 196968     | A2 |
| C15orf52 388115     | A2 |
| C15orf54 400360     | A2 |
| C15orf63 25764      | A2 |
| C16orf13 84326      | A2 |
| C16orf53 79447      | A2 |
| C16orf55 124045     | A2 |
| C16orf58 64755      | A2 |
| C16orf5 29965       | A2 |
| C16orf61 56942      | A2 |
| C16orf70 80262      | A2 |
| C16orf71 146562     | A2 |
| C16orf72 29035      | A2 |
| C16orf75 116028     | A2 |
| C16orf88 400506     | A2 |
| C16orf91 283951     | A2 |
| C17orf100 388327    | A2 |
| C17orf103 256302    | A2 |
| C17orf107 100130311 | A2 |
| C17orf28 283987     | A2 |
| C17orf39 79018      | A2 |
| C17orf51 339263     | A2 |
| C17orf57 124989     | A2 |
| C17orf62 79415      | A2 |
| C17orf65 339201     | A2 |
| C17orf69 147081     | A2 |
| C17orf70 80233      | A2 |
| C17orf81 23587      | A2 |
| C17orf85 55421      | A2 |
| C17orf90 339229     | A2 |

|                    |    |
|--------------------|----|
| C17orf91 84981     | A2 |
| C18orf18 147525    | A2 |
| C18orf32 497661    | A2 |
| C18orf34 374864    | A2 |
| C18orf56 494514    | A2 |
| C19orf10 56005     | A2 |
| C19orf21 126353    | A2 |
| C19orf22 91300     | A2 |
| C19orf24 55009     | A2 |
| C19orf28 126321    | A2 |
| C19orf39 126074    | A2 |
| C19orf40 91442     | A2 |
| C19orf45 374877    | A2 |
| C19orf46 163183    | A2 |
| C19orf48 84798     | A2 |
| C19orf51 352909    | A2 |
| C19orf52 90580     | A2 |
| C19orf53 28974     | A2 |
| C19orf61 56006     | A2 |
| C19orf63 284361    | A2 |
| C19orf69 100170765 | A2 |
| C1GALT1C1 29071    | A2 |
| C1QL2 165257       | A2 |
| C1QTNF6 114904     | A2 |
| C1QTNF9 338872     | A2 |
| C1RL 51279         | A2 |
| C1orf103 55791     | A2 |
| C1orf112 55732     | A2 |
| C1orf115 79762     | A2 |
| C1orf122 127687    | A2 |
| C1orf124 83932     | A2 |
| C1orf130 400746    | A2 |
| C1orf131 128061    | A2 |
| C1orf135 79000     | A2 |
| C1orf156 92342     | A2 |
| C1orf175 374977    | A2 |
| C1orf182 128229    | A2 |
| C1orf183 55924     | A2 |
| C1orf220 400798    | A2 |
| C1orf27 54953      | A2 |
| C1orf35 79169      | A2 |
| C1orf43 25912      | A2 |
| C1orf52 148423     | A2 |
| C1orf53 388722     | A2 |
| C1orf56 54964      | A2 |
| C1orf57 84284      | A2 |
| C1orf58 148362     | A2 |
| C1orf77 26097      | A2 |
| C1orf85 112770     | A2 |
| C1orf93 127281     | A2 |
| C1orf97 84791      | A2 |

|                  |    |
|------------------|----|
| C1orf9 51430     | A2 |
| C20orf103 24141  | A2 |
| C20orf112 140688 | A2 |
| C20orf132 140699 | A2 |
| C20orf151 140893 | A2 |
| C20orf160 140706 | A2 |
| C20orf165 128497 | A2 |
| C20orf203 284805 | A2 |
| C20orf20 55257   | A2 |
| C20orf24 55969   | A2 |
| C20orf54 113278  | A2 |
| C21orf2 755      | A2 |
| C21orf45 54069   | A2 |
| C21orf49 54067   | A2 |
| C21orf59 56683   | A2 |
| C21orf63 59271   | A2 |
| C22orf46 79640   | A2 |
| C2CD2L 9854      | A2 |
| C2orf18 54978    | A2 |
| C2orf29 55571    | A2 |
| C2orf48 348738   | A2 |
| C2orf58 285154   | A2 |
| C2orf74 339804   | A2 |
| C2orf86 51057    | A2 |
| C2orf88 84281    | A2 |
| C3orf14 57415    | A2 |
| C3orf18 51161    | A2 |
| C3orf21 152002   | A2 |
| C3orf36 80111    | A2 |
| C3orf38 285237   | A2 |
| C3orf42 84657    | A2 |
| C3orf47 339942   | A2 |
| C3orf50 93556    | A2 |
| C3orf52 79669    | A2 |
| C3orf54 389119   | A2 |
| C3orf67 200844   | A2 |
| C4A 720          | A2 |
| C4orf12 404201   | A2 |
| C4orf23 152992   | A2 |
| C4orf34 201895   | A2 |
| C4orf38 152641   | A2 |
| C4orf42 92070    | A2 |
| C4orf46 201725   | A2 |
| C4orf48 401115   | A2 |
| C5orf13 9315     | A2 |
| C5orf15 56951    | A2 |
| C5orf22 55322    | A2 |
| C5orf30 90355    | A2 |
| C5orf41 153222   | A2 |
| C5orf43 643155   | A2 |
| C5orf45 51149    | A2 |

|                    |    |
|--------------------|----|
| C5orf49 134121     | A2 |
| C5orf56 441108     | A2 |
| C5orf62 85027      | A2 |
| C6orf115 58527     | A2 |
| C6orf120 387263    | A2 |
| C6orf122 401288    | A2 |
| C6orf123 26238     | A2 |
| C6orf125 84300     | A2 |
| C6orf126 389383    | A2 |
| C6orf127 340204    | A2 |
| C6orf145 221749    | A2 |
| C6orf150 115004    | A2 |
| C6orf153 88745     | A2 |
| C6orf154 221424    | A2 |
| C6orf163 206412    | A2 |
| C6orf164 63914     | A2 |
| C6orf191 253582    | A2 |
| C6orf1 221491      | A2 |
| C6orf204 387119    | A2 |
| C6orf35 729515     | A2 |
| C6orf57 135154     | A2 |
| C6orf59 79992      | A2 |
| C6orf62 81688      | A2 |
| C6orf64 55776      | A2 |
| C6orf89 221477     | A2 |
| C7orf11 136647     | A2 |
| C7orf28A 51622     | A2 |
| C7orf47 221908     | A2 |
| C7orf58 79974      | A2 |
| C7orf70 84792      | A2 |
| C8orf30A 51236     | A2 |
| C8orf38 137682     | A2 |
| C8orf51 78998      | A2 |
| C8orf58 541565     | A2 |
| C8orf76 84933      | A2 |
| C8orf83 286144     | A2 |
| C9orf100 84904     | A2 |
| C9orf102 375748    | A2 |
| C9orf116 138162    | A2 |
| C9orf119 375757    | A2 |
| C9orf11 54586      | A2 |
| C9orf125 84302     | A2 |
| C9orf130 100128782 | A2 |
| C9orf131 138724    | A2 |
| C9orf140 89958     | A2 |
| C9orf142 286257    | A2 |
| C9orf144B 259308   | A2 |
| C9orf163 158055    | A2 |
| C9orf172 389813    | A2 |
| C9orf21 195827     | A2 |
| C9orf30 91283      | A2 |

|                 |    |
|-----------------|----|
| C9orf46 55848   | A2 |
| C9orf5 23731    | A2 |
| C9orf64 84267   | A2 |
| C9orf72 203228  | A2 |
| C9orf7 11094    | A2 |
| C9orf85 138241  | A2 |
| C9orf89 84270   | A2 |
| C9orf95 54981   | A2 |
| C9orf98 158067  | A2 |
| CA4 762         | A2 |
| CA5B 11238      | A2 |
| CAB39L 81617    | A2 |
| CABLES2 81928   | A2 |
| CABP1 9478      | A2 |
| CABYR 26256     | A2 |
| CACNA1C 775     | A2 |
| CACNA1D 776     | A2 |
| CACNB3 784      | A2 |
| CACNG4 27092    | A2 |
| CADM3 57863     | A2 |
| CADPS 8618      | A2 |
| CALM2 805       | A2 |
| CALN1 83698     | A2 |
| CALR 811        | A2 |
| CALU 813        | A2 |
| CAMK2N2 94032   | A2 |
| CAMKK2 10645    | A2 |
| CAMTA2 23125    | A2 |
| CAND1 55832     | A2 |
| CANT1 124583    | A2 |
| CAP1 10487      | A2 |
| CAPG 822        | A2 |
| CAPN1 823       | A2 |
| CAPN6 827       | A2 |
| CAPRIN1 4076    | A2 |
| CAPRIN2 65981   | A2 |
| CAPS2 84698     | A2 |
| CAPS 828        | A2 |
| CARD10 29775    | A2 |
| CARD6 84674     | A2 |
| CARD8 22900     | A2 |
| CARM1 10498     | A2 |
| CASC5 57082     | A2 |
| CASP2 835       | A2 |
| CASP3 836       | A2 |
| CASP6 839       | A2 |
| CATSPER1 117144 | A2 |
| CATSPER2 117155 | A2 |
| CAV1 857        | A2 |
| CAV2 858        | A2 |
| CBFB 865        | A2 |

|                   |    |
|-------------------|----|
| CBLC 23624        | A2 |
| CBL 867           | A2 |
| CBX1 10951        | A2 |
| CBX2 84733        | A2 |
| CBX4 8535         | A2 |
| CBX6 23466        | A2 |
| CC2D2B 387707     | A2 |
| CCAR1 55749       | A2 |
| CCBE1 147372      | A2 |
| CCDC102A 92922    | A2 |
| CCDC109B 55013    | A2 |
| CCDC111 201973    | A2 |
| CCDC112 153733    | A2 |
| CCDC116 164592    | A2 |
| CCDC121 79635     | A2 |
| CCDC123 84902     | A2 |
| CCDC125 202243    | A2 |
| CCDC136 64753     | A2 |
| CCDC137 339230    | A2 |
| CCDC138 165055    | A2 |
| CCDC150 284992    | A2 |
| CCDC152 100129792 | A2 |
| CCDC158 339965    | A2 |
| CCDC19 25790      | A2 |
| CCDC22 28952      | A2 |
| CCDC24 149473     | A2 |
| CCDC25 55246      | A2 |
| CCDC28A 25901     | A2 |
| CCDC43 124808     | A2 |
| CCDC50 152137     | A2 |
| CCDC51 79714      | A2 |
| CCDC52 152185     | A2 |
| CCDC54 84692      | A2 |
| CCDC58 131076     | A2 |
| CCDC64 92558      | A2 |
| CCDC75 253635     | A2 |
| CCDC76 54482      | A2 |
| CCDC78 124093     | A2 |
| CCDC82 79780      | A2 |
| CCDC87 55231      | A2 |
| CCDC88C 440193    | A2 |
| CCDC8 83987       | A2 |
| CCDC96 257236     | A2 |
| CCDC99 54908      | A2 |
| CCL16 6360        | A2 |
| CCNA2 890         | A2 |
| CCNB1IP1 57820    | A2 |
| CCNB1 891         | A2 |
| CCNB2 9133        | A2 |
| CCND2 894         | A2 |
| CCNE1 898         | A2 |

|                |    |
|----------------|----|
| CCNE2 9134     | A2 |
| CCNF 899       | A2 |
| CCNG1 900      | A2 |
| CCNK 8812      | A2 |
| CCNL1 57018    | A2 |
| CCNO 10309     | A2 |
| CCR10 2826     | A2 |
| CCR8 1237      | A2 |
| CCT3 7203      | A2 |
| CCT5 22948     | A2 |
| CCT7 10574     | A2 |
| CCT8 10694     | A2 |
| CD160 11126    | A2 |
| CD164L2 388611 | A2 |
| CD209 30835    | A2 |
| CD300LG 146894 | A2 |
| CD302 9936     | A2 |
| CD34 947       | A2 |
| CD46 4179      | A2 |
| CD86 942       | A2 |
| CD9 928        | A2 |
| CDC123 8872    | A2 |
| CDC14C 168448  | A2 |
| CDC20 991      | A2 |
| CDC25A 993     | A2 |
| CDC25C 995     | A2 |
| CDC42EP4 23580 | A2 |
| CDC42SE1 56882 | A2 |
| CDC42 998      | A2 |
| CDC45 8318     | A2 |
| CDC73 79577    | A2 |
| CDC7 8317      | A2 |
| CDCA2 157313   | A2 |
| CDCA3 83461    | A2 |
| CDCA4 55038    | A2 |
| CDCA5 113130   | A2 |
| CDCA8 55143    | A2 |
| CDCP2 200008   | A2 |
| CDH11 1009     | A2 |
| CDH12 1010     | A2 |
| CDH20 28316    | A2 |
| CDH23 64072    | A2 |
| CDH4 1002      | A2 |
| CDK10 8558     | A2 |
| CDK16 5127     | A2 |
| CDK1 983       | A2 |
| CDK2AP2 10263  | A2 |
| CDK2 1017      | A2 |
| CDK3 1018      | A2 |
| CDK4 1019      | A2 |
| CDK5 1020      | A2 |

|                    |    |
|--------------------|----|
| CDK7 1022          | A2 |
| CDKL2 8999         | A2 |
| CDKN1C 1028        | A2 |
| CDKN2AIP 55602     | A2 |
| CDKN2BAS 100048912 | A2 |
| CDKN2C 1031        | A2 |
| CDKN2D 1032        | A2 |
| CDKN3 1033         | A2 |
| CDR2L 30850        | A2 |
| CDR2 1039          | A2 |
| CDT1 81620         | A2 |
| CEBPD 1052         | A2 |
| CECR7 100130418    | A2 |
| CELF2 10659        | A2 |
| CELSR1 9620        | A2 |
| CELSR3 1951        | A2 |
| CENPA 1058         | A2 |
| CENPC1 1060        | A2 |
| CENPE 1062         | A2 |
| CENPF 1063         | A2 |
| CENPH 64946        | A2 |
| CENPI 2491         | A2 |
| CENPK 64105        | A2 |
| CENPL 91687        | A2 |
| CENPN 55839        | A2 |
| CENPO 79172        | A2 |
| CENPP 401541       | A2 |
| CEP120 153241      | A2 |
| CEP350 9857        | A2 |
| CEP55 55165        | A2 |
| CEP57 9702         | A2 |
| CEP78 84131        | A2 |
| CEP97 79598        | A2 |
| CERKL 375298       | A2 |
| CES4 51716         | A2 |
| CETN2 1069         | A2 |
| CETN4P 729338      | A2 |
| CFB 629            | A2 |
| CFD 1675           | A2 |
| CFI 3426           | A2 |
| CFLAR 8837         | A2 |
| CFLP1 142913       | A2 |
| CG030 116828       | A2 |
| CGB7 94027         | A2 |
| CGNL1 84952        | A2 |
| CGN 57530          | A2 |
| CGRRF1 10668       | A2 |
| CH25H 9023         | A2 |
| CHAC2 494143       | A2 |
| CHAF1A 10036       | A2 |
| CHAF1B 8208        | A2 |



|                   |    |
|-------------------|----|
| CHCHD1 118487     | A2 |
| CHCHD5 84269      | A2 |
| CHCHD8 51287      | A2 |
| CHD4 1108         | A2 |
| CHD9 80205        | A2 |
| CHEK1 1111        | A2 |
| CHEK2 11200       | A2 |
| CHFR 55743        | A2 |
| CHIC2 26511       | A2 |
| CHKB-CPT1B 386593 | A2 |
| CHMP4B 128866     | A2 |
| CHMP5 51510       | A2 |
| CHORDC1 26973     | A2 |
| CHPF2 54480       | A2 |
| CHPF 79586        | A2 |
| CHRAC1 54108      | A2 |
| CHRFAM7A 89832    | A2 |
| CHRNA6 8973       | A2 |
| CHRNA7 1139       | A2 |
| CHST11 50515      | A2 |
| CHST15 51363      | A2 |
| CHST6 4166        | A2 |
| CHST7 56548       | A2 |
| CHSY3 337876      | A2 |
| CIB3 117286       | A2 |
| CIDEA 1149        | A2 |
| CIRBP 1153        | A2 |
| CISD2 493856      | A2 |
| CITED2 10370      | A2 |
| CKAP2L 150468     | A2 |
| CKAP2 26586       | A2 |
| CKAP4 10970       | A2 |
| CKAP5 9793        | A2 |
| CKLF 51192        | A2 |
| CKS1B 1163        | A2 |
| CKS2 1164         | A2 |
| CLASP1 23332      | A2 |
| CLCN2 1181        | A2 |
| CLCN7 1186        | A2 |
| CLDN14 23562      | A2 |
| CLDN15 24146      | A2 |
| CLDN18 51208      | A2 |
| CLDN5 7122        | A2 |
| CLDN7 1366        | A2 |
| CLEC11A 6320      | A2 |
| CLEC1A 51267      | A2 |
| CLEC4GP1 440508   | A2 |
| CLEC5A 23601      | A2 |
| CLGN 1047         | A2 |
| CLIC1 1192        | A2 |
| CLIP3 25999       | A2 |

|                |    |
|----------------|----|
| CLIP4 79745    | A2 |
| CLK1 1195      | A2 |
| CLK3 1198      | A2 |
| CLK4 57396     | A2 |
| CLN6 54982     | A2 |
| CLN8 2055      | A2 |
| CLPB 81570     | A2 |
| CLPP 8192      | A2 |
| CLPTM1L 81037  | A2 |
| CLPTM1 1209    | A2 |
| CLSPN 63967    | A2 |
| CLVS1 157807   | A2 |
| CLYBL 171425   | A2 |
| CMA1 1215      | A2 |
| CMPK1 51727    | A2 |
| CNIH2 254263   | A2 |
| CNIH4 29097    | A2 |
| CNIH 10175     | A2 |
| CNN1 1264      | A2 |
| CNNM4 26504    | A2 |
| CNOT3 4849     | A2 |
| CNOT6L 246175  | A2 |
| CNO 55330      | A2 |
| CNPY2 10330    | A2 |
| CNPY3 10695    | A2 |
| COBLL1 22837   | A2 |
| COG2 22796     | A2 |
| COG7 91949     | A2 |
| COIL 8161      | A2 |
| COL10A1 1300   | A2 |
| COL11A1 1301   | A2 |
| COL12A1 1303   | A2 |
| COL14A1 7373   | A2 |
| COL1A1 1277    | A2 |
| COL23A1 91522  | A2 |
| COL24A1 255631 | A2 |
| COL25A1 84570  | A2 |
| COL4A3BP 10087 | A2 |
| COL5A1 1289    | A2 |
| COL5A2 1290    | A2 |
| COL6A3 1293    | A2 |
| COL6A6 131873  | A2 |
| COL8A1 1295    | A2 |
| COLEC11 78989  | A2 |
| COMMD10 51397  | A2 |
| COMMD3 23412   | A2 |
| COMMD4 54939   | A2 |
| COMMD5 28991   | A2 |
| COMMD7 149951  | A2 |
| COMP 1311      | A2 |
| COMTD1 118881  | A2 |

|                |    |
|----------------|----|
| COPB1 1315     | A2 |
| COPB2 9276     | A2 |
| COPE 11316     | A2 |
| COPG 22820     | A2 |
| COPS2 9318     | A2 |
| COPS5 10987    | A2 |
| COPS8 10920    | A2 |
| COPZ1 22818    | A2 |
| CORIN 10699    | A2 |
| CORO1B 57175   | A2 |
| CORO1C 23603   | A2 |
| CORO2A 7464    | A2 |
| CORO2B 10391   | A2 |
| CORO7 79585    | A2 |
| COX16 51241    | A2 |
| COX17 10063    | A2 |
| COX4I2 84701   | A2 |
| COX6C 1345     | A2 |
| COX7A2 1347    | A2 |
| COX8A 1351     | A2 |
| CPA1 1357      | A2 |
| CPM 1368       | A2 |
| CPNE3 8895     | A2 |
| CPNE8 144402   | A2 |
| CPSF2 53981    | A2 |
| CPVL 54504     | A2 |
| CPXM2 119587   | A2 |
| CR1 1378       | A2 |
| CRABP2 1382    | A2 |
| CRADD 8738     | A2 |
| CRB2 286204    | A2 |
| CRB3 92359     | A2 |
| CRBN 51185     | A2 |
| CRCP 27297     | A2 |
| CREB3L1 90993  | A2 |
| CREB3L4 148327 | A2 |
| CREB5 9586     | A2 |
| CRELD1 78987   | A2 |
| CRELD2 79174   | A2 |
| CRHBP 1393     | A2 |
| CRIP1 1396     | A2 |
| CRK 1398       | A2 |
| CRTC2 200186   | A2 |
| CRY2 1408      | A2 |
| CRYAB 1410     | A2 |
| CRYBG3 131544  | A2 |
| CRYGS 1427     | A2 |
| CRYL1 51084    | A2 |
| CRYZL1 9946    | A2 |
| CSAD 51380     | A2 |
| CSDE1 7812     | A2 |

|                  |    |
|------------------|----|
| CSF1 1435        | A2 |
| CSGALNACT1 55790 | A2 |
| CSK 1445         | A2 |
| CSMD2 114784     | A2 |
| CSNK2B 1460      | A2 |
| CSRNP1 64651     | A2 |
| CSRNP2 81566     | A2 |
| CSRNP3 80034     | A2 |
| CSRP1 1465       | A2 |
| CST2 1470        | A2 |
| CSTF2 1478       | A2 |
| CTAGE5 4253      | A2 |
| CTDSP2 10106     | A2 |
| CTDSPL 10217     | A2 |
| CTHRC1 115908    | A2 |
| CTNNAL1 8727     | A2 |
| CTPS2 56474      | A2 |
| CTPS 1503        | A2 |
| CTSG 1511        | A2 |
| CTXN1 404217     | A2 |
| CUBN 8029        | A2 |
| CUTA 51596       | A2 |
| CWC22 57703      | A2 |
| CWF19L2 143884   | A2 |
| CX3CR1 1524      | A2 |
| CXCL12 6387      | A2 |
| CXCL2 2920       | A2 |
| CXCL3 2921       | A2 |
| CXXC5 51523      | A2 |
| CXorf36 79742    | A2 |
| CXorf40A 91966   | A2 |
| CXorf40B 541578  | A2 |
| CYB561D1 284613  | A2 |
| CYB561D2 11068   | A2 |
| CYB561 1534      | A2 |
| CYB5D2 124936    | A2 |
| CYBRD1 79901     | A2 |
| CYCS 54205       | A2 |
| CYFIP2 26999     | A2 |
| CYMP 643160      | A2 |
| CYP2B7P1 1556    | A2 |
| CYP46A1 10858    | A2 |
| CYP51A1 1595     | A2 |
| CYP7A1 1581      | A2 |
| CYR61 3491       | A2 |
| CYTH3 9265       | A2 |
| DACT1 51339      | A2 |
| DACT2 168002     | A2 |
| DAD1 1603        | A2 |
| DAGLB 221955     | A2 |
| DAPK2 23604      | A2 |

|                |    |
|----------------|----|
| DAP 1611       | A2 |
| DARC 2532      | A2 |
| DARS2 55157    | A2 |
| DAXX 1616      | A2 |
| DAZAP1 26528   | A2 |
| DBC1 1620      | A2 |
| DBNDD1 79007   | A2 |
| DBX2 440097    | A2 |
| DCAF10 79269   | A2 |
| DCAF12 25853   | A2 |
| DCAF13 25879   | A2 |
| DCAF5 8816     | A2 |
| DCAKD 79877    | A2 |
| DCBLD1 285761  | A2 |
| DCBLD2 131566  | A2 |
| DCK 1633       | A2 |
| DCTN5 84516    | A2 |
| DCTPP1 79077   | A2 |
| DCUN1D3 123879 | A2 |
| DCUN1D4 23142  | A2 |
| DCUN1D5 84259  | A2 |
| DDAH1 23576    | A2 |
| DDB1 1642      | A2 |
| DDB2 1643      | A2 |
| DDOST 1650     | A2 |
| DDO 8528       | A2 |
| DDR1 780       | A2 |
| DDR2 4921      | A2 |
| DDX17 10521    | A2 |
| DDX19A 55308   | A2 |
| DDX19B 11269   | A2 |
| DDX23 9416     | A2 |
| DDX24 57062    | A2 |
| DDX25 29118    | A2 |
| DDX39 10212    | A2 |
| DDX3X 1654     | A2 |
| DDX41 51428    | A2 |
| DDX49 54555    | A2 |
| DDX56 54606    | A2 |
| DDX58 23586    | A2 |
| DEDD2 162989   | A2 |
| DEFB1 1672     | A2 |
| DEGS2 123099   | A2 |
| DEM1 64789     | A2 |
| DENND2A 27147  | A2 |
| DENND3 22898   | A2 |
| DENND4C 55667  | A2 |
| DENND5A 23258  | A2 |
| DENND5B 160518 | A2 |
| DEPDC1B 55789  | A2 |
| DEPDC1 55635   | A2 |

|                      |    |
|----------------------|----|
| DEPDC7 91614         | A2 |
| DERL1 79139          | A2 |
| DET1 55070           | A2 |
| DGUOK 1716           | A2 |
| DHCR24 1718          | A2 |
| DHDPSL 112817        | A2 |
| DHRS12 79758         | A2 |
| DHTKD1 55526         | A2 |
| DHX15 1665           | A2 |
| DHX29 54505          | A2 |
| DHX38 9785           | A2 |
| DIABLO 56616         | A2 |
| DIAPH2 1730          | A2 |
| DIO3OS 64150         | A2 |
| DIP2C 22982          | A2 |
| DIRC1 116093         | A2 |
| DIXDC1 85458         | A2 |
| DKC1 1736            | A2 |
| DKFZP434L187 26082   | A2 |
| DKFZp779M0652 374387 | A2 |
| DKK3 27122           | A2 |
| DLEC1 9940           | A2 |
| DLEU1 10301          | A2 |
| DLG3 1741            | A2 |
| DLGAP5 9787          | A2 |
| DLL1 28514           | A2 |
| DLL4 54567           | A2 |
| DLST 1743            | A2 |
| DMRT2 10655          | A2 |
| DMXL1 1657           | A2 |
| DNA2 1763            | A2 |
| DNAH14 127602        | A2 |
| DNAH6 1768           | A2 |
| DNAH9 1770           | A2 |
| DNAJA1 3301          | A2 |
| DNAJA3 9093          | A2 |
| DNAJA4 55466         | A2 |
| DNAJB4 11080         | A2 |
| DNAJC10 54431        | A2 |
| DNAJC14 85406        | A2 |
| DNAJC1 64215         | A2 |
| DNAJC22 79962        | A2 |
| DNAJC2 27000         | A2 |
| DNAJC7 7266          | A2 |
| DNAJC9 23234         | A2 |
| DNASE1L2 1775        | A2 |
| DNASE1 1773          | A2 |
| DNASE2 1777          | A2 |
| DNM3 26052           | A2 |
| DNMT1 1786           | A2 |
| DNMT3A 1788          | A2 |

|                |    |
|----------------|----|
| DNMT3B 1789    | A2 |
| DNPEP 23549    | A2 |
| DOCK11 139818  | A2 |
| DOCK4 9732     | A2 |
| DOCK8 81704    | A2 |
| DOCK9 23348    | A2 |
| DOK3 79930     | A2 |
| DOLK 22845     | A2 |
| DOLPP1 57171   | A2 |
| DONSON 29980   | A2 |
| DOPEY1 23033   | A2 |
| DOPEY2 9980    | A2 |
| DPAGT1 1798    | A2 |
| DPCD 25911     | A2 |
| DPEP1 1800     | A2 |
| DPH2 1802      | A2 |
| DPM1 8813      | A2 |
| DPP3 10072     | A2 |
| DPP6 1804      | A2 |
| DPP9 91039     | A2 |
| DPRX 503834    | A2 |
| DPYD 1806      | A2 |
| DRAP1 10589    | A2 |
| DRD1 1812      | A2 |
| DRD4 1815      | A2 |
| DSC1 1823      | A2 |
| DSCC1 79075    | A2 |
| DSCR6 53820    | A2 |
| DSE 29940      | A2 |
| DTL 51514      | A2 |
| DTWD1 56986    | A2 |
| DTX2 113878    | A2 |
| DTX3L 151636   | A2 |
| DUSP12 11266   | A2 |
| DUSP14 11072   | A2 |
| DUSP19 142679  | A2 |
| DUSP1 1843     | A2 |
| DUSP7 1849     | A2 |
| DVL3 1857      | A2 |
| DYNC1LI1 51143 | A2 |
| DYNC1LI2 1783  | A2 |
| DYNLL1 8655    | A2 |
| DYNLT1 6993    | A2 |
| DYX1C1 161582  | A2 |
| DZIP1L 199221  | A2 |
| E2F2 1870      | A2 |
| E2F3 1871      | A2 |
| E2F5 1875      | A2 |
| E2F7 144455    | A2 |
| E2F8 79733     | A2 |
| E4F1 1877      | A2 |

|                 |    |
|-----------------|----|
| EA1 85403       | A2 |
| EBNA1BP2 10969  | A2 |
| EBP 10682       | A2 |
| ECE2 9718       | A2 |
| ECHDC1 55862    | A2 |
| ECHDC3 79746    | A2 |
| ECT2 1894       | A2 |
| EDA2R 60401     | A2 |
| EDA 1896        | A2 |
| EDEM2 55741     | A2 |
| EDEM3 80267     | A2 |
| EDN1 1906       | A2 |
| EDN2 1907       | A2 |
| EEA1 8411       | A2 |
| EEF1A1P9 441032 | A2 |
| EEF1A1 1915     | A2 |
| EEF1B2 1933     | A2 |
| EEF1E1 9521     | A2 |
| EEF2K 29904     | A2 |
| EEF2 1938       | A2 |
| EFCAB1 79645    | A2 |
| EFEMP1 2202     | A2 |
| EFNA1 1942      | A2 |
| EFNA3 1944      | A2 |
| EFNA4 1945      | A2 |
| EFNB1 1947      | A2 |
| EFNB3 1949      | A2 |
| EFR3A 23167     | A2 |
| EFTUD2 9343     | A2 |
| EGFL7 51162     | A2 |
| EGFL8 80864     | A2 |
| EGFLAM 133584   | A2 |
| EGR1 1958       | A2 |
| EGR2 1959       | A2 |
| EGR3 1960       | A2 |
| EHD3 30845      | A2 |
| EHHADH 1962     | A2 |
| EHMT2 10919     | A2 |
| EID1 23741      | A2 |
| EID2B 126272    | A2 |
| EIF1AD 84285    | A2 |
| EIF1B 10289     | A2 |
| EIF2AK2 5610    | A2 |
| EIF2AK3 9451    | A2 |
| EIF2B3 8891     | A2 |
| EIF2C4 192670   | A2 |
| EIF2S2 8894     | A2 |
| EIF3D 8664      | A2 |
| EIF3H 8667      | A2 |
| EIF4A2 1974     | A2 |
| EIF4A3 9775     | A2 |



|                |    |
|----------------|----|
| EIF4B 1975     | A2 |
| EIF4E 1977     | A2 |
| EIF4G1 1981    | A2 |
| EIF5AL1 143244 | A2 |
| EIF5A 1984     | A2 |
| EIF5B 9669     | A2 |
| EIF6 3692      | A2 |
| ELANE 1991     | A2 |
| ELAVL1 1994    | A2 |
| ELF4 2000      | A2 |
| ELF5 2001      | A2 |
| ELK1 2002      | A2 |
| ELL3 80237     | A2 |
| ELMO2 63916    | A2 |
| ELMOD2 255520  | A2 |
| ELMOD3 84173   | A2 |
| EMCN 51705     | A2 |
| EME1 146956    | A2 |
| EMILIN2 84034  | A2 |
| EMILIN3 90187  | A2 |
| EML3 256364    | A2 |
| EML5 161436    | A2 |
| EMP1 2012      | A2 |
| EMP2 2013      | A2 |
| ENC1 8507      | A2 |
| ENDOU 8909     | A2 |
| ENGASE 64772   | A2 |
| ENG 2022       | A2 |
| ENO2 2026      | A2 |
| ENOPH1 58478   | A2 |
| ENPP2 5168     | A2 |
| ENPP6 133121   | A2 |
| ENSA 2029      | A2 |
| ENTPD7 57089   | A2 |
| ENY2 56943     | A2 |
| EPAS1 2034     | A2 |
| EPB41L2 2037   | A2 |
| EPB41L4B 54566 | A2 |
| EPB49 2039     | A2 |
| EPC1 80314     | A2 |
| EPCAM 4072     | A2 |
| EPHA2 1969     | A2 |
| EPHB6 2051     | A2 |
| EPHX2 2053     | A2 |
| EPN3 55040     | A2 |
| EPR1 8475      | A2 |
| EPS15L1 58513  | A2 |
| EPS15 2060     | A2 |
| EPS8L1 54869   | A2 |
| EPS8 2059      | A2 |
| EPSTI1 94240   | A2 |

|               |    |
|---------------|----|
| ERAP1 51752   | A2 |
| ERBB2IP 55914 | A2 |
| ERCC5 2073    | A2 |
| ERGIC1 57222  | A2 |
| ERGIC2 51290  | A2 |
| ERG 2078      | A2 |
| ERH 2079      | A2 |
| ERI2 112479   | A2 |
| ERI3 79033    | A2 |
| ERICH1 157697 | A2 |
| ERLEC1 27248  | A2 |
| ERMAP 114625  | A2 |
| ERMN 57471    | A2 |
| ERMP1 79956   | A2 |
| ERO1L 30001   | A2 |
| ERP27 121506  | A2 |
| ERRFI 54206   | A2 |
| ESCO2 157570  | A2 |
| ESM1 11082    | A2 |
| ESPL1 9700    | A2 |
| ESPN 83715    | A2 |
| ESR1 2099     | A2 |
| ESR2 2100     | A2 |
| ESRP1 54845   | A2 |
| ESRP2 80004   | A2 |
| ESYT1 23344   | A2 |
| ESYT2 57488   | A2 |
| ETFB 2109     | A2 |
| ETFDH 2110    | A2 |
| ETNK2 55224   | A2 |
| ETS2 2114     | A2 |
| ETV1 2115     | A2 |
| ETV3L 440695  | A2 |
| ETV5 2119     | A2 |
| ETV7 51513    | A2 |
| EVI5 7813     | A2 |
| EVL 51466     | A2 |
| EVPL 2125     | A2 |
| EXO1 9156     | A2 |
| EXOC3 11336   | A2 |
| EXOC6B 23233  | A2 |
| EXOC6 54536   | A2 |
| EXOSC1 51013  | A2 |
| EXOSC3 51010  | A2 |
| EXOSC4 54512  | A2 |
| EXTL2 2135    | A2 |
| EZH2 2146     | A2 |
| EZR 7430      | A2 |
| F10 2159      | A2 |
| F11R 50848    | A2 |
| F12 2161      | A2 |

|                   |    |
|-------------------|----|
| F2RL2 2151        | A2 |
| F2R 2149          | A2 |
| F7 2155           | A2 |
| F8 2157           | A2 |
| FAAH 2166         | A2 |
| FADD 8772         | A2 |
| FAF2 23197        | A2 |
| FAHD1 81889       | A2 |
| FAM103A1 83640    | A2 |
| FAM104A 84923     | A2 |
| FAM107A 11170     | A2 |
| FAM108C1 58489    | A2 |
| FAM10A4 145165    | A2 |
| FAM110A 83541     | A2 |
| FAM110B 90362     | A2 |
| FAM111B 374393    | A2 |
| FAM114A1 92689    | A2 |
| FAM117A 81558     | A2 |
| FAM122B 159090    | A2 |
| FAM124A 220108    | A2 |
| FAM125B 89853     | A2 |
| FAM128A 653784    | A2 |
| FAM131A 131408    | A2 |
| FAM135A 57579     | A2 |
| FAM136A 84908     | A2 |
| FAM13AOS 285512   | A2 |
| FAM13A 10144      | A2 |
| FAM149A 25854     | A2 |
| FAM151B 167555    | A2 |
| FAM153A 285596    | A2 |
| FAM156A 29057     | A2 |
| FAM158A 51016     | A2 |
| FAM162A 26355     | A2 |
| FAM162B 221303    | A2 |
| FAM168B 130074    | A2 |
| FAM170B 170370    | A2 |
| FAM171A1 221061   | A2 |
| FAM172A 83989     | A2 |
| FAM173A 65990     | A2 |
| FAM174B 400451    | A2 |
| FAM175A 84142     | A2 |
| FAM180A 389558    | A2 |
| FAM181A 90050     | A2 |
| FAM186B 84070     | A2 |
| FAM189B 10712     | A2 |
| FAM18A 780776     | A2 |
| FAM190B 54462     | A2 |
| FAM193B 54540     | A2 |
| FAM195A 84331     | A2 |
| FAM196B 100131897 | A2 |
| FAM19A1 407738    | A2 |

|                   |    |
|-------------------|----|
| FAM200B 285550    | A2 |
| FAM23A 653567     | A2 |
| FAM26D 221301     | A2 |
| FAM36A 116228     | A2 |
| FAM43A 131583     | A2 |
| FAM47E 100129583  | A2 |
| FAM49B 51571      | A2 |
| FAM53C 51307      | A2 |
| FAM54A 113115     | A2 |
| FAM54B 56181      | A2 |
| FAM55D 54827      | A2 |
| FAM64A 54478      | A2 |
| FAM65A 79567      | A2 |
| FAM66A 100133172  | A2 |
| FAM69A 388650     | A2 |
| FAM70A 55026      | A2 |
| FAM72B 653820     | A2 |
| FAM72D 728833     | A2 |
| FAM76A 199870     | A2 |
| FAM7A2 100288380  | A2 |
| FAM83D 81610      | A2 |
| FAM95B1 100133036 | A2 |
| FAM96A 84191      | A2 |
| FANCA 2175        | A2 |
| FANCD2 2177       | A2 |
| FANCF 2188        | A2 |
| FANCG 2189        | A2 |
| FANCI 55215       | A2 |
| FARP1 10160       | A2 |
| FARSA 2193        | A2 |
| FARSB 10056       | A2 |
| FASTKD3 79072     | A2 |
| FAT1 2195         | A2 |
| FAT4 79633        | A2 |
| FBLN5 10516       | A2 |
| FBP1 2203         | A2 |
| FBRS 64319        | A2 |
| FBXL14 144699     | A2 |
| FBXL16 146330     | A2 |
| FBXL19 54620      | A2 |
| FBXL22 283807     | A2 |
| FBXL5 26234       | A2 |
| FBXL6 26233       | A2 |
| FBXO16 157574     | A2 |
| FBXO17 115290     | A2 |
| FBXO22OS 692224   | A2 |
| FBXO28 23219      | A2 |
| FBXO33 254170     | A2 |
| FBXO41 150726     | A2 |
| FBXO42 54455      | A2 |
| FBXO43 286151     | A2 |

|                  |    |
|------------------|----|
| FBXO45 200933    | A2 |
| FBXO48 554251    | A2 |
| FBXO5 26271      | A2 |
| FBXO6 26270      | A2 |
| FBXO8 26269      | A2 |
| FCGR1A 2209      | A2 |
| FCGR1B 2210      | A2 |
| FCGR1C 100132417 | A2 |
| FCGR3A 2214      | A2 |
| FCGRT 2217       | A2 |
| FDPS 2224        | A2 |
| FDXR 2232        | A2 |
| FEN1 2237        | A2 |
| FER 2241         | A2 |
| FEZ2 9637        | A2 |
| FGD1 2245        | A2 |
| FGD3 89846       | A2 |
| FGD4 121512      | A2 |
| FGF17 8822       | A2 |
| FGF2 2247        | A2 |
| FGF7 2252        | A2 |
| FGF8 2253        | A2 |
| FGF9 2254        | A2 |
| FGFBP3 143282    | A2 |
| FGFR1OP2 26127   | A2 |
| FGFR1 2260       | A2 |
| FGL2 10875       | A2 |
| FHAD1 114827     | A2 |
| FHL5 9457        | A2 |
| FHOD3 80206      | A2 |
| FH 2271          | A2 |
| FIBP 9158        | A2 |
| FIGNL2 401720    | A2 |
| FIGN 55137       | A2 |
| FKBP10 60681     | A2 |
| FKBP3 2287       | A2 |
| FKBP4 2288       | A2 |
| FKBPL 63943      | A2 |
| FKTN 2218        | A2 |
| FLJ10357 55701   | A2 |
| FLJ26850 400710  | A2 |
| FLJ33360 401172  | A2 |
| FLJ35024 401491  | A2 |
| FLJ36777 730971  | A2 |
| FLJ37543 285668  | A2 |
| FLJ39653 202020  | A2 |
| FLJ42875 440556  | A2 |
| FLJ43390 646113  | A2 |
| FLJ43663 378805  | A2 |
| FLJ44635 392490  | A2 |
| FLJ45340 402483  | A2 |

|                 |    |
|-----------------|----|
| FLJ45983 399717 | A2 |
| FLRT2 23768     | A2 |
| FLT4 2324       | A2 |
| FLVCR1 28982    | A2 |
| FLYWCH2 114984  | A2 |
| FMNL2 114793    | A2 |
| FMO2 2327       | A2 |
| FMO4 2329       | A2 |
| FMOD 2331       | A2 |
| FN1 2335        | A2 |
| FNDC1 84624     | A2 |
| FNDC3A 22862    | A2 |
| FNIP2 57600     | A2 |
| FOLR2 2350      | A2 |
| FOSB 2354       | A2 |
| FOS 2353        | A2 |
| FOXA1 3169      | A2 |
| FOXD4L1 200350  | A2 |
| FOXH1 8928      | A2 |
| FOXK2 3607      | A2 |
| FOXM1 2305      | A2 |
| FOXN2 3344      | A2 |
| FOXN3 1112      | A2 |
| FOXO1 2308      | A2 |
| FOXP2 93986     | A2 |
| FOXP3 50943     | A2 |
| FOXRED2 80020   | A2 |
| FOXS1 2307      | A2 |
| FRAT2 23401     | A2 |
| FREM1 158326    | A2 |
| FRG1B 284802    | A2 |
| FRG1 2483       | A2 |
| FRK 2444        | A2 |
| FRMD4A 55691    | A2 |
| FRMD4B 23150    | A2 |
| FRMPD1 22844    | A2 |
| FRMPD4 9758     | A2 |
| FRY 10129       | A2 |
| FSIP1 161835    | A2 |
| FTO 79068       | A2 |
| FTSJ1 24140     | A2 |
| FTSJ2 29960     | A2 |
| FUNDC1 139341   | A2 |
| FUT10 84750     | A2 |
| FUT2 2524       | A2 |
| FUT8 2530       | A2 |
| FXYD3 5349      | A2 |
| FZD5 7855       | A2 |
| FZD7 8324       | A2 |
| G3BP1 10146     | A2 |
| G6PC3 92579     | A2 |

|                 |    |
|-----------------|----|
| GAB3 139716     | A2 |
| GABARAPL1 23710 | A2 |
| GABARAPL3 23766 | A2 |
| GABBR1 2550     | A2 |
| GABPA 2551      | A2 |
| GABRA4 2557     | A2 |
| GABRD 2563      | A2 |
| GABRE 2564      | A2 |
| GABRG1 2565     | A2 |
| GAK 2580        | A2 |
| GAL3ST3 89792   | A2 |
| GAL3ST4 79690   | A2 |
| GALE 2582       | A2 |
| GALNS 2588      | A2 |
| GALNT10 55568   | A2 |
| GALNT11 63917   | A2 |
| GALNT1 2589     | A2 |
| GALNT6 11226    | A2 |
| GALNT7 51809    | A2 |
| GALNTL1 57452   | A2 |
| GALR1 2587      | A2 |
| GALT 2592       | A2 |
| GANAB 23193     | A2 |
| GAPT 202309     | A2 |
| GARS 2617       | A2 |
| GART 2618       | A2 |
| GAS2L2 246176   | A2 |
| GAS2L3 283431   | A2 |
| GAS2 2620       | A2 |
| GAS7 8522       | A2 |
| GATA3 2625      | A2 |
| GATA6 2627      | A2 |
| GATAD2A 54815   | A2 |
| GBA 2629        | A2 |
| GBE1 2632       | A2 |
| GBF1 8729       | A2 |
| GCAT 23464      | A2 |
| GCH1 2643       | A2 |
| GCNT4 51301     | A2 |
| GDE1 51573      | A2 |
| GDF10 2662      | A2 |
| GDI1 2664       | A2 |
| GDI2 2665       | A2 |
| GEFT 115557     | A2 |
| GEMIN4 50628    | A2 |
| GEMIN7 79760    | A2 |
| GFAP 2670       | A2 |
| GFER 2671       | A2 |
| GFM1 85476      | A2 |
| GFOD1 54438     | A2 |
| GFRA2 2675      | A2 |

|               |    |
|---------------|----|
| GGCT 79017    | A2 |
| GGT7 2686     | A2 |
| GGTA1 2681    | A2 |
| GHR 2690      | A2 |
| GIGYF1 64599  | A2 |
| GIMAP4 55303  | A2 |
| GIMAP5 55340  | A2 |
| GIMAP6 474344 | A2 |
| GIMAP8 155038 | A2 |
| GINS1 9837    | A2 |
| GINS2 51659   | A2 |
| GINS3 64785   | A2 |
| GIPC1 10755   | A2 |
| GIPC2 54810   | A2 |
| GIT2 9815     | A2 |
| GIYD2 79008   | A2 |
| GJA3 2700     | A2 |
| GJB2 2706     | A2 |
| GJD3 125111   | A2 |
| GK 2710       | A2 |
| GLB1 2720     | A2 |
| GLDN 342035   | A2 |
| GLE1 2733     | A2 |
| GLG1 2734     | A2 |
| GLIS2 84662   | A2 |
| GLIS3 169792  | A2 |
| GLO1 2739     | A2 |
| GLP2R 9340    | A2 |
| GLRA4 441509  | A2 |
| GLRX2 51022   | A2 |
| GLRX3 10539   | A2 |
| GLT25D1 79709 | A2 |
| GLTSCR2 29997 | A2 |
| GLYR1 84656   | A2 |
| GMDS 2762     | A2 |
| GMIP 51291    | A2 |
| GMPPA 29926   | A2 |
| GMPS 8833     | A2 |
| GNA11 2767    | A2 |
| GNAI3 2773    | A2 |
| GNAZ 2781     | A2 |
| GNB2 2783     | A2 |
| GNG11 2791    | A2 |
| GNG12 55970   | A2 |
| GNG5 2787     | A2 |
| GNG7 2788     | A2 |
| GNL1 2794     | A2 |
| GNL2 29889    | A2 |
| GNPDA1 10007  | A2 |
| GPNAT1 64841  | A2 |
| GOLGA2 2801   | A2 |



|                 |    |
|-----------------|----|
| GOLGA5 9950     | A2 |
| GOLGA6L5 374650 | A2 |
| GOLGA8A 23015   | A2 |
| GOLGA8B 440270  | A2 |
| GOLGA8C 729786  | A2 |
| GOLGA9P 283796  | A2 |
| GOLM1 51280     | A2 |
| GOLPH3L 55204   | A2 |
| GOLPH3 64083    | A2 |
| GOLT1A 127845   | A2 |
| GOLT1B 51026    | A2 |
| GON4L 54856     | A2 |
| GORASP1 64689   | A2 |
| GORASP2 26003   | A2 |
| GPAA1 8733      | A2 |
| GPAM 57678      | A2 |
| GPATCH4 54865   | A2 |
| GPC3 2719       | A2 |
| GPC4 2239       | A2 |
| GPIHBP1 338328  | A2 |
| GPLD1 2822      | A2 |
| GPM6B 2824      | A2 |
| GPN1 11321      | A2 |
| GPR109B 8843    | A2 |
| GPR112 139378   | A2 |
| GPR120 338557   | A2 |
| GPR124 25960    | A2 |
| GPR135 64582    | A2 |
| GPR137B 7107    | A2 |
| GPR137C 283554  | A2 |
| GPR137 56834    | A2 |
| GPR142 350383   | A2 |
| GPR143 4935     | A2 |
| GPR144 347088   | A2 |
| GPR146 115330   | A2 |
| GPR149 344758   | A2 |
| GPR160 26996    | A2 |
| GPR172A 79581   | A2 |
| GPR17 2840      | A2 |
| GPR182 11318    | A2 |
| GPR19 2842      | A2 |
| GPR45 11250     | A2 |
| GPR68 8111      | A2 |
| GPR75 10936     | A2 |
| GPR77 27202     | A2 |
| GPR81 27198     | A2 |
| GPR84 53831     | A2 |
| GPR88 54112     | A2 |
| GPR89A 653519   | A2 |
| GPR97 222487    | A2 |
| GPRC5A 9052     | A2 |

|                   |    |
|-------------------|----|
| GPRC5B 51704      | A2 |
| GPSM2 29899       | A2 |
| GPX8 493869       | A2 |
| GRAMD1A 57655     | A2 |
| GRAMD3 65983      | A2 |
| GRASP 160622      | A2 |
| GRB2 2885         | A2 |
| GREM2 64388       | A2 |
| GRHL2 79977       | A2 |
| GRIK5 2901        | A2 |
| GRIN2B 2904       | A2 |
| GRINL1A 81488     | A2 |
| GRM7 2917         | A2 |
| GRM8 2918         | A2 |
| GRN 2896          | A2 |
| GRPEL2 134266     | A2 |
| GRRP1 79927       | A2 |
| GRTP1 79774       | A2 |
| GSG2 83903        | A2 |
| GSK3A 2931        | A2 |
| GSK3B 2932        | A2 |
| GSN 2934          | A2 |
| GTF2E1 2960       | A2 |
| GTF2H1 2965       | A2 |
| GTF2IRD1 9569     | A2 |
| GTF2IRD2B 389524  | A2 |
| GTF2IRD2P1 401375 | A2 |
| GTF2IRD2 84163    | A2 |
| GTF3C1 2975       | A2 |
| GTF3C2 2976       | A2 |
| GTPBP3 84705      | A2 |
| GTPBP4 23560      | A2 |
| GTSE1 51512       | A2 |
| GUCA1A 2978       | A2 |
| GUK1 2987         | A2 |
| GYPE 2995         | A2 |
| GYPE 2996         | A2 |
| H1F0 3005         | A2 |
| H2AFV 94239       | A2 |
| H2AFX 3014        | A2 |
| H6PD 9563         | A2 |
| HABP4 22927       | A2 |
| HACL1 26061       | A2 |
| HADHA 3030        | A2 |
| HADH 3033         | A2 |
| HAGHL 84264       | A2 |
| HAND2 9464        | A2 |
| HAP1 9001         | A2 |
| HAPLN4 404037     | A2 |
| HARBII 283254     | A2 |
| HARS2 23438       | A2 |

|                 |    |
|-----------------|----|
| HAS3 3038       | A2 |
| HAUS1 115106    | A2 |
| HAUS4 54930     | A2 |
| HAUS8 93323     | A2 |
| HBEGF 1839      | A2 |
| HBP1 26959      | A2 |
| HCFC2 29915     | A2 |
| HCG11 493812    | A2 |
| HCG22 285834    | A2 |
| HCN3 57657      | A2 |
| HCRTR1 3061     | A2 |
| HDAC1 3065      | A2 |
| HDAC5 10014     | A2 |
| HDAC6 10013     | A2 |
| HDAC7 51564     | A2 |
| HDAC8 55869     | A2 |
| HDGF 3068       | A2 |
| HEATR2 54919    | A2 |
| HEATR3 55027    | A2 |
| HELLS 3070      | A2 |
| HELQ1 113510    | A2 |
| HERC2 8924      | A2 |
| HERPUD2 64224   | A2 |
| HES6 55502      | A2 |
| HEYL 26508      | A2 |
| HFM1 164045     | A2 |
| HGF 3082        | A2 |
| HHAT 55733      | A2 |
| HIATL1 84641    | A2 |
| HIF3A 64344     | A2 |
| HIPK2 28996     | A2 |
| HIPK3 10114     | A2 |
| HIST1H1C 3006   | A2 |
| HIST1H1T 3010   | A2 |
| HIST1H2AC 8334  | A2 |
| HIST1H2AD 3013  | A2 |
| HIST1H2AJ 8331  | A2 |
| HIST1H2AM 8336  | A2 |
| HIST1H2BC 8347  | A2 |
| HIST1H2BD 3017  | A2 |
| HIST1H2BE 8344  | A2 |
| HIST1H2BG 8339  | A2 |
| HIST1H2BH 8345  | A2 |
| HIST1H2BJ 8970  | A2 |
| HIST1H2BK 85236 | A2 |
| HIST1H2BN 8341  | A2 |
| HIST1H2BO 8348  | A2 |
| HIST1H3D 8351   | A2 |
| HIST1H3E 8353   | A2 |
| HIST1H3F 8968   | A2 |
| HIST1H3H 8357   | A2 |

|                  |    |
|------------------|----|
| HIST1H3J 8356    | A2 |
| HIST1H4A 8359    | A2 |
| HIST1H4D 8360    | A2 |
| HIST1H4I 8294    | A2 |
| HIST1H4J 8363    | A2 |
| HIST2H2AA3 8337  | A2 |
| HIST2H2AC 8338   | A2 |
| HIST2H2BE 8349   | A2 |
| HIST2H2BF 440689 | A2 |
| HIST3H2BB 128312 | A2 |
| HIVEP2 3097      | A2 |
| HJURP 55355      | A2 |
| HK1 3098         | A2 |
| HLA-C 3107       | A2 |
| HLA-E 3133       | A2 |
| HLCS 3141        | A2 |
| HLTF 6596        | A2 |
| HM13 81502       | A2 |
| HMBS 3145        | A2 |
| HMG20B 10362     | A2 |
| HMGA2 8091       | A2 |
| HMGB2 3148       | A2 |
| HMGB3 3149       | A2 |
| HMGCLL1 54511    | A2 |
| HMGN1 3150       | A2 |
| HMGN2 3151       | A2 |
| HMGN3 9324       | A2 |
| HMMR 3161        | A2 |
| HMOX2 3163       | A2 |
| HN1L 90861       | A2 |
| HN1 51155        | A2 |
| HNMT 3176        | A2 |
| HNRNPA2B1 3181   | A2 |
| HNRNPC 3183      | A2 |
| HNRNPK 3190      | A2 |
| HNRNPUL1 11100   | A2 |
| HNRPDL 9987      | A2 |
| HOMER3 9454      | A2 |
| HOOK2 29911      | A2 |
| HOOK3 84376      | A2 |
| HOPX 84525       | A2 |
| HOTAIR 100124700 | A2 |
| HOXA10 3206      | A2 |
| HOXA7 3204       | A2 |
| HOXA9 3205       | A2 |
| HOXC10 3226      | A2 |
| HOXC11 3227      | A2 |
| HOXC13 3229      | A2 |
| HOXC4 3221       | A2 |
| HOXD10 3236      | A2 |
| HOXD4 3233       | A2 |

|                |    |
|----------------|----|
| HPN 3249       | A2 |
| HPS1 3257      | A2 |
| HPS4 89781     | A2 |
| HPS5 11234     | A2 |
| HPSE2 60495    | A2 |
| HRASLS5 117245 | A2 |
| HRH4 59340     | A2 |
| HRNR 388697    | A2 |
| HS3ST3A1 9955  | A2 |
| HS3ST4 9951    | A2 |
| HS6ST1 9394    | A2 |
| HS6ST3 266722  | A2 |
| HSD11B1 3290   | A2 |
| HSD17B10 3028  | A2 |
| HSD17B11 51170 | A2 |
| HSD17B6 8630   | A2 |
| HSD17B7 51478  | A2 |
| HSDL2 84263    | A2 |
| HSF2BP 11077   | A2 |
| HSF4 3299      | A2 |
| HSH2D 84941    | A2 |
| HSP90AA1 3320  | A2 |
| HSP90AB1 3326  | A2 |
| HSP90B1 7184   | A2 |
| HSPA12B 116835 | A2 |
| HSPA13 6782    | A2 |
| HSPA4 3308     | A2 |
| HSPA5 3309     | A2 |
| HSPA8 3312     | A2 |
| HSPA9 3313     | A2 |
| HSPB1 3315     | A2 |
| HSPB2 3316     | A2 |
| HSPB6 126393   | A2 |
| HSPBP1 23640   | A2 |
| HSPC157 29092  | A2 |
| HSPD1 3329     | A2 |
| HSPE1 3336     | A2 |
| HSPH1 10808    | A2 |
| HTATIP2 10553  | A2 |
| HTR1D 3352     | A2 |
| HTR2A 3356     | A2 |
| HTR3C 170572   | A2 |
| HTR4 3360      | A2 |
| HUS1 3364      | A2 |
| HYAL3 8372     | A2 |
| HYLS1 219844   | A2 |
| HYOU1 10525    | A2 |
| IARS2 55699    | A2 |
| IARS 3376      | A2 |
| ICAM2 3384     | A2 |
| ICT1 3396      | A2 |

|                |    |
|----------------|----|
| ID1 3397       | A2 |
| IDE 3416       | A2 |
| IER3IP1 51124  | A2 |
| IER5L 389792   | A2 |
| IFFO2 126917   | A2 |
| IFI30 10437    | A2 |
| IFI35 3430     | A2 |
| IFI6 2537      | A2 |
| IFNE 338376    | A2 |
| IFNGR1 3459    | A2 |
| IGF1 3479      | A2 |
| IGFBP6 3489    | A2 |
| IGFBPL1 347252 | A2 |
| IGJ 3512       | A2 |
| IKBKE 9641     | A2 |
| IKZF4 64375    | A2 |
| IL11 3589      | A2 |
| IL15RA 3601    | A2 |
| IL17RA 23765   | A2 |
| IL18 3606      | A2 |
| IL1R1 3554     | A2 |
| IL1RL2 8808    | A2 |
| IL21R 50615    | A2 |
| IL22RA1 58985  | A2 |
| IL28RA 163702  | A2 |
| IL4I1 259307   | A2 |
| IL4R 3566      | A2 |
| IL9R 3581      | A2 |
| ILDR1 286676   | A2 |
| ILDR2 387597   | A2 |
| IMMP2L 83943   | A2 |
| INCENP 3619    | A2 |
| INE1 8552      | A2 |
| INHBA 3624     | A2 |
| INHBB 3625     | A2 |
| INO80 54617    | A2 |
| INPP5A 3632    | A2 |
| INTS8 55656    | A2 |
| INTU 27152     | A2 |
| IP6K1 9807     | A2 |
| IPO9 55705     | A2 |
| IPPK 64768     | A2 |
| IPW 3653       | A2 |
| IQCD 115811    | A2 |
| IQCK 124152    | A2 |
| IQGAP3 128239  | A2 |
| IQSEC1 9922    | A2 |
| IRAK2 3656     | A2 |
| IRF7 3665      | A2 |
| IRF9 10379     | A2 |
| IRS2 8660      | A2 |

|                 |    |
|-----------------|----|
| IRX1 79192      | A2 |
| IRX5 10265      | A2 |
| IRX6 79190      | A2 |
| ISG15 9636      | A2 |
| ISG20L2 81875   | A2 |
| ISLR2 57611     | A2 |
| ISOC2 79763     | A2 |
| ITFG2 55846     | A2 |
| ITGA1 3672      | A2 |
| ITGA3 3675      | A2 |
| ITGA6 3655      | A2 |
| ITGA9 3680      | A2 |
| ITIH5 80760     | A2 |
| ITPR1 3708      | A2 |
| ITPR3 3710      | A2 |
| ITPRIPL1 150771 | A2 |
| JAG1 182        | A2 |
| JAG2 3714       | A2 |
| JAK1 3716       | A2 |
| JAKMIP1 152789  | A2 |
| JAM2 58494      | A2 |
| JAM3 83700      | A2 |
| JMJD1C 221037   | A2 |
| JMJD4 65094     | A2 |
| JMY 133746      | A2 |
| JPH4 84502      | A2 |
| JRKL 8690       | A2 |
| JRK 8629        | A2 |
| JTB 10899       | A2 |
| JUND 3727       | A2 |
| JUN 3725        | A2 |
| KALRN 8997      | A2 |
| KANK1 23189     | A2 |
| KANK3 256949    | A2 |
| KAT2B 8850      | A2 |
| KATNAL1 84056   | A2 |
| KBTD3 143879    | A2 |
| KBTD6 89890     | A2 |
| KCNA1 3736      | A2 |
| KCNA2 3737      | A2 |
| KCNA4 3739      | A2 |
| KCNAB1 7881     | A2 |
| KCNH1 3756      | A2 |
| KCNH3 23416     | A2 |
| KCNH5 27133     | A2 |
| KCNH8 131096    | A2 |
| KCNIP3 30818    | A2 |
| KCNIP4 80333    | A2 |
| KCNJ2 3759      | A2 |
| KCNK15 60598    | A2 |
| KCNK1 3775      | A2 |

|                 |    |
|-----------------|----|
| KCNK6 9424      | A2 |
| KCNMB1 3779     | A2 |
| KCNS3 3790      | A2 |
| KCTD10 83892    | A2 |
| KCTD13 253980   | A2 |
| KCTD15 79047    | A2 |
| KCTD2 23510     | A2 |
| KCTD3 51133     | A2 |
| KCTD4 386618    | A2 |
| KCTD6 200845    | A2 |
| KCTD7 154881    | A2 |
| KDELC1 79070    | A2 |
| KDELR1 10945    | A2 |
| KDELR2 11014    | A2 |
| KDELR3 11015    | A2 |
| KDM1A 23028     | A2 |
| KDM1B 221656    | A2 |
| KDM4B 23030     | A2 |
| KDM5B 10765     | A2 |
| KDM6B 23135     | A2 |
| KHDRBS1 10657   | A2 |
| KIAA0040 9674   | A2 |
| KIAA0101 9768   | A2 |
| KIAA0141 9812   | A2 |
| KIAA0196 9897   | A2 |
| KIAA0226 9711   | A2 |
| KIAA0240 23506  | A2 |
| KIAA0355 9710   | A2 |
| KIAA0391 9692   | A2 |
| KIAA0406 9675   | A2 |
| KIAA0408 9729   | A2 |
| KIAA0427 9811   | A2 |
| KIAA0430 9665   | A2 |
| KIAA0467 23334  | A2 |
| KIAA0494 9813   | A2 |
| KIAA0495 57212  | A2 |
| KIAA0556 23247  | A2 |
| KIAA0754 643314 | A2 |
| KIAA0831 22863  | A2 |
| KIAA0895 23366  | A2 |
| KIAA1009 22832  | A2 |
| KIAA1045 23349  | A2 |
| KIAA1107 23285  | A2 |
| KIAA1109 84162  | A2 |
| KIAA1143 57456  | A2 |
| KIAA1199 57214  | A2 |
| KIAA1211 57482  | A2 |
| KIAA1328 57536  | A2 |
| KIAA1522 57648  | A2 |
| KIAA1524 57650  | A2 |
| KIAA1598 57698  | A2 |



|                 |    |
|-----------------|----|
| KIAA1671 85379  | A2 |
| KIAA1683 80726  | A2 |
| KIAA1841 84542  | A2 |
| KIAA1908 114796 | A2 |
| KIF11 3832      | A2 |
| KIF13A 63971    | A2 |
| KIF14 9928      | A2 |
| KIF15 56992     | A2 |
| KIF18A 81930    | A2 |
| KIF18B 146909   | A2 |
| KIF1C 10749     | A2 |
| KIF20A 10112    | A2 |
| KIF21A 55605    | A2 |
| KIF22 3835      | A2 |
| KIF23 9493      | A2 |
| KIF24 347240    | A2 |
| KIF25 3834      | A2 |
| KIF26A 26153    | A2 |
| KIF26B 55083    | A2 |
| KIF2C 11004     | A2 |
| KIF3B 9371      | A2 |
| KIF4A 24137     | A2 |
| KIF4B 285643    | A2 |
| KIFAP3 22920    | A2 |
| KIFC1 3833      | A2 |
| KIFC2 90990     | A2 |
| KIT 3815        | A2 |
| KLC2 64837      | A2 |
| KLF10 7071      | A2 |
| KLF11 8462      | A2 |
| KLF13 51621     | A2 |
| KLF15 28999     | A2 |
| KLF1 10661      | A2 |
| KLF2 10365      | A2 |
| KLF3 51274      | A2 |
| KLF4 9314       | A2 |
| KLF6 1316       | A2 |
| KLF8 11279      | A2 |
| KLHDC2 23588    | A2 |
| KLHDC8B 200942  | A2 |
| KLHL10 317719   | A2 |
| KLHL12 59349    | A2 |
| KLHL13 90293    | A2 |
| KLHL15 80311    | A2 |
| KLHL32 114792   | A2 |
| KLK4 9622       | A2 |
| KLKP1 606293    | A2 |
| KLRAQ1 129285   | A2 |
| KLRF1 51348     | A2 |
| KNTC1 9735      | A2 |
| KPNA5 3841      | A2 |

|                  |    |
|------------------|----|
| KPNB1 3837       | A2 |
| KPTN 11133       | A2 |
| KRAS 3845        | A2 |
| KRBA2 124751     | A2 |
| KREMEN1 83999    | A2 |
| KRT14 3861       | A2 |
| KRT15 3866       | A2 |
| KRT17 3872       | A2 |
| KRT5 3852        | A2 |
| KRT8 3856        | A2 |
| KRTAP13-4 284827 | A2 |
| KRTCAP2 200185   | A2 |
| KY 339855        | A2 |
| L3MBTL 26013     | A2 |
| LAGE3 8270       | A2 |
| LAMA3 3909       | A2 |
| LAMB2L 22973     | A2 |
| LAMB3 3914       | A2 |
| LAMC2 3918       | A2 |
| LAMC3 10319      | A2 |
| LANCL1 10314     | A2 |
| LAPTM4B 55353    | A2 |
| LARP1B 55132     | A2 |
| LARP4B 23185     | A2 |
| LARP4 113251     | A2 |
| LARP6 55323      | A2 |
| LAS1L 81887      | A2 |
| LASS2 29956      | A2 |
| LASS6 253782     | A2 |
| LAT2 7462        | A2 |
| LCA5L 150082     | A2 |
| LCMT1 51451      | A2 |
| LCN10 414332     | A2 |
| LDHA 3939        | A2 |
| LDHB 3945        | A2 |
| LDHD 197257      | A2 |
| LDLRAD2 401944   | A2 |
| LEF1 51176       | A2 |
| LEMD2 221496     | A2 |
| LEPREL2 10536    | A2 |
| LEPROT 54741     | A2 |
| LETM1 3954       | A2 |
| LGALS12 85329    | A2 |
| LGALS8 3964      | A2 |
| LGI4 163175      | A2 |
| LGR6 59352       | A2 |
| LHCGR 3973       | A2 |
| LHFP 10186       | A2 |
| LIAS 11019       | A2 |
| LIF 3976         | A2 |
| LILRB5 10990     | A2 |

|                        |    |
|------------------------|----|
| LIMA1 51474            | A2 |
| LIN9 286826            | A2 |
| LIPC 3990              | A2 |
| LIPT1 51601            | A2 |
| LLGL2 3993             | A2 |
| LLPH 84298             | A2 |
| LMAN1 3998             | A2 |
| LMAN2 10960            | A2 |
| LMBR1 64327            | A2 |
| LMNB2 84823            | A2 |
| LMO2 4005              | A2 |
| LMOD1 25802            | A2 |
| LOC100126784 100126784 | A2 |
| LOC100128164 100128164 | A2 |
| LOC100128191 100128191 | A2 |
| LOC100128288 100128288 | A2 |
| LOC100128640 100128640 | A2 |
| LOC100128675 100128675 | A2 |
| LOC100129066 100129066 | A2 |
| LOC100129387 100129387 | A2 |
| LOC100129550 100129550 | A2 |
| LOC100129637 100129637 | A2 |
| LOC100129726 100129726 | A2 |
| LOC100130015 100130015 | A2 |
| LOC100130932 100130932 | A2 |
| LOC100131193 100131193 | A2 |
| LOC100131434 100131434 | A2 |
| LOC100131496 100131496 | A2 |
| LOC100132724 100132724 | A2 |
| LOC100133545 100133545 | A2 |
| LOC100134259 100134259 | A2 |
| LOC100134713 100134713 | A2 |
| LOC100144603 100144603 | A2 |
| LOC100190938 100190938 | A2 |
| LOC100190939 100190939 | A2 |
| LOC100240726 100240726 | A2 |
| LOC100240735 100240735 | A2 |
| LOC100271722 100271722 | A2 |
| LOC100302650 100302650 | A2 |
| LOC113230 113230       | A2 |
| LOC143188 143188       | A2 |
| LOC144571 144571       | A2 |
| LOC145820 145820       | A2 |
| LOC147727 147727       | A2 |
| LOC148145 148145       | A2 |
| LOC148709 148709       | A2 |
| LOC151009 151009       | A2 |
| LOC201651 201651       | A2 |
| LOC221122 221122       | A2 |
| LOC221442 221442       | A2 |
| LOC283392 283392       | A2 |

|                  |    |
|------------------|----|
| LOC283856 283856 | A2 |
| LOC283867 283867 | A2 |
| LOC283922 283922 | A2 |
| LOC284009 284009 | A2 |
| LOC284440 284440 | A2 |
| LOC284661 284661 | A2 |
| LOC285074 285074 | A2 |
| LOC285205 285205 | A2 |
| LOC285796 285796 | A2 |
| LOC338588 338588 | A2 |
| LOC338758 338758 | A2 |
| LOC339674 339674 | A2 |
| LOC341056 341056 | A2 |
| LOC342346 342346 | A2 |
| LOC344967 344967 | A2 |
| LOC349196 349196 | A2 |
| LOC374443 374443 | A2 |
| LOC375190 375190 | A2 |
| LOC387647 387647 | A2 |
| LOC388955 388955 | A2 |
| LOC389493 389493 | A2 |
| LOC390595 390595 | A2 |
| LOC399815 399815 | A2 |
| LOC400027 400027 | A2 |
| LOC400931 400931 | A2 |
| LOC401010 401010 | A2 |
| LOC401093 401093 | A2 |
| LOC401431 401431 | A2 |
| LOC415056 415056 | A2 |
| LOC493754 493754 | A2 |
| LOC541471 541471 | A2 |
| LOC550643 550643 | A2 |
| LOC55908 55908   | A2 |
| LOC572558 572558 | A2 |
| LOC642587 642587 | A2 |
| LOC642826 642826 | A2 |
| LOC643387 643387 | A2 |
| LOC644538 644538 | A2 |
| LOC646982 646982 | A2 |
| LOC647309 647309 | A2 |
| LOC648740 648740 | A2 |
| LOC650368 650368 | A2 |
| LOC650623 650623 | A2 |
| LOC653501 653501 | A2 |
| LOC653566 653566 | A2 |
| LOC654342 654342 | A2 |
| LOC728392 728392 | A2 |
| LOC728554 728554 | A2 |
| LOC729467 729467 | A2 |
| LOC729799 729799 | A2 |
| LOC90784 90784   | A2 |

|                  |    |
|------------------|----|
| LOC90834 90834   | A2 |
| LOC91149 91149   | A2 |
| LOC92659 92659   | A2 |
| LOH12CR2 503693  | A2 |
| LOH3CR2A 29931   | A2 |
| LONRF1 91694     | A2 |
| LONRF3 79836     | A2 |
| LOXL1 4016       | A2 |
| LPAR1 1902       | A2 |
| LPAR5 57121      | A2 |
| LPAR6 10161      | A2 |
| LPCAT1 79888     | A2 |
| LPHN2 23266      | A2 |
| LPHN3 23284      | A2 |
| LPL 4023         | A2 |
| LPPR1 54886      | A2 |
| LPPR2 64748      | A2 |
| LPPR4 9890       | A2 |
| LRBA 987         | A2 |
| LRFN1 57622      | A2 |
| LRFN2 57497      | A2 |
| LRIG2 9860       | A2 |
| LRMP 4033        | A2 |
| LRP8 7804        | A2 |
| LRRC29 26231     | A2 |
| LRRC33 375387    | A2 |
| LRRC34 151827    | A2 |
| LRRC37A4 55073   | A2 |
| LRRC3 81543      | A2 |
| LRRC42 115353    | A2 |
| LRRC45 201255    | A2 |
| LRRC4B 94030     | A2 |
| LRRC56 115399    | A2 |
| LRRC61 65999     | A2 |
| LRRC6 23639      | A2 |
| LRRC70 100130733 | A2 |
| LRRC8C 84230     | A2 |
| LRRC8E 80131     | A2 |
| LRRC1 85444      | A2 |
| LRRN2 10446      | A2 |
| LRRN4CL 221091   | A2 |
| LRRTM1 347730    | A2 |
| LRSAM1 90678     | A2 |
| LRWD1 222229     | A2 |
| LSM12 124801     | A2 |
| LSM14B 149986    | A2 |
| LSM2 57819       | A2 |
| LSM3 27258       | A2 |
| LSM5 23658       | A2 |
| LSR 51599        | A2 |
| LTBP2 4053       | A2 |

|                 |    |
|-----------------|----|
| LTBP4 8425      | A2 |
| LTC4S 4056      | A2 |
| LUZP2 338645    | A2 |
| LY6G5B 58496    | A2 |
| LY75 4065       | A2 |
| LYPD1 116372    | A2 |
| LYPLA1 10434    | A2 |
| LYPLA2P1 653639 | A2 |
| LYPLA2 11313    | A2 |
| LYPLAL1 127018  | A2 |
| LYRM1 57149     | A2 |
| LYRM7 90624     | A2 |
| LYSMD1 388695   | A2 |
| LYVE1 10894     | A2 |
| MAD2L1BP 9587   | A2 |
| MAD2L1 4085     | A2 |
| MAFG 4097       | A2 |
| MAFK 7975       | A2 |
| MAF 4094        | A2 |
| MAGED1 9500     | A2 |
| MAGED2 10916    | A2 |
| MAGEF1 64110    | A2 |
| MAGIX 79917     | A2 |
| MAGOHB 55110    | A2 |
| MAL2 114569     | A2 |
| MAML3 55534     | A2 |
| MAN2A2 4122     | A2 |
| MAN2B1 4125     | A2 |
| MANEAL 149175   | A2 |
| MAOA 4128       | A2 |
| MAP1D 254042    | A2 |
| MAP2K6 5608     | A2 |
| MAP3K14 9020    | A2 |
| MAP3K3 4215     | A2 |
| MAP3K4 4216     | A2 |
| MAP3K5 4217     | A2 |
| MAP3K6 9064     | A2 |
| MAP3K8 1326     | A2 |
| MAP4K2 5871     | A2 |
| MAP7 9053       | A2 |
| MAPK10 5602     | A2 |
| MAPK11 5600     | A2 |
| MAPK13 5603     | A2 |
| MAPK15 225689   | A2 |
| MAPK8IP2 23542  | A2 |
| MAPK9 5601      | A2 |
| MAPKAPK2 9261   | A2 |
| MAPKAPK5 8550   | A2 |
| MAPRE1 22919    | A2 |
| MARCH9 92979    | A2 |
| MARCKSL1 65108  | A2 |

|                  |    |
|------------------|----|
| MARS 4141        | A2 |
| MASP1 5648       | A2 |
| MASP2 10747      | A2 |
| MASTL 84930      | A2 |
| MAT2B 27430      | A2 |
| MATN3 4148       | A2 |
| MAVS 57506       | A2 |
| MBD1 4152        | A2 |
| MBD4 8930        | A2 |
| MBL1P 8512       | A2 |
| MBLAC2 153364    | A2 |
| MBNL1 4154       | A2 |
| MBNL2 10150      | A2 |
| MBNL3 55796      | A2 |
| MBOAT2 129642    | A2 |
| MBP 4155         | A2 |
| MC1R 4157        | A2 |
| MCC 4163         | A2 |
| MCFD2 90411      | A2 |
| MCM10 55388      | A2 |
| MCM2 4171        | A2 |
| MCM4 4173        | A2 |
| MCM6 4175        | A2 |
| MCOLN2 255231    | A2 |
| MCPH1 79648      | A2 |
| MCTS1 28985      | A2 |
| MDN1 23195       | A2 |
| ME3 10873        | A2 |
| MEA1 4201        | A2 |
| MEAF6 64769      | A2 |
| MECP2 4204       | A2 |
| MED14 9282       | A2 |
| MED20 9477       | A2 |
| MED25 81857      | A2 |
| MED8 112950      | A2 |
| MED9 55090       | A2 |
| MEGF8 1954       | A2 |
| MEIS1 4211       | A2 |
| MEIS3P1 4213     | A2 |
| MEIS3 56917      | A2 |
| MELK 9833        | A2 |
| MEMO1 51072      | A2 |
| MEN1 4221        | A2 |
| MEOX2 4223       | A2 |
| MERTK 10461      | A2 |
| MESDC2 23184     | A2 |
| MESTIT1 317751   | A2 |
| METRN 79006      | A2 |
| METT10D 79066    | A2 |
| METTLL11B 149281 | A2 |
| METTLL13 51603   | A2 |

|                 |    |
|-----------------|----|
| METTL2A 339175  | A2 |
| MEX3A 92312     | A2 |
| MEX3D 399664    | A2 |
| MFAP2 4237      | A2 |
| MFSD10 10227    | A2 |
| MFSD3 113655    | A2 |
| MFSD5 84975     | A2 |
| MGAT2 4247      | A2 |
| MGAT3 4248      | A2 |
| MGAT4A 11320    | A2 |
| MGAT4B 11282    | A2 |
| MGC15885 197003 | A2 |
| MGC21881 389741 | A2 |
| MGC23284 197187 | A2 |
| MGC87042 256227 | A2 |
| MGRN1 23295     | A2 |
| MICAL2 9645     | A2 |
| MICALL2 79778   | A2 |
| MICB 4277       | A2 |
| MIF 4282        | A2 |
| MINK1 50488     | A2 |
| MINPP1 9562     | A2 |
| MIR17HG 407975  | A2 |
| MKI67IP 84365   | A2 |
| MKI67 4288      | A2 |
| MKLN1 4289      | A2 |
| MKNK1 8569      | A2 |
| MLF2 8079       | A2 |
| MLLT11 10962    | A2 |
| MLL 4297        | A2 |
| MLPH 79083      | A2 |
| MLST8 64223     | A2 |
| MLXIPL 51085    | A2 |
| MLYCD 23417     | A2 |
| MMGT1 93380     | A2 |
| MMP11 4320      | A2 |
| MMP14 4323      | A2 |
| MMP19 4327      | A2 |
| MMP3 4314       | A2 |
| MMRN2 79812     | A2 |
| MND1 84057      | A2 |
| MOCS1 4337      | A2 |
| MOCS3 27304     | A2 |
| MOGS 7841       | A2 |
| MORC2 22880     | A2 |
| MORF4L2 9643    | A2 |
| MOSPD3 64598    | A2 |
| MOV10 4343      | A2 |
| MOXD1 26002     | A2 |
| MPDU1 9526      | A2 |
| MPHOSPH8 54737  | A2 |



|                |    |
|----------------|----|
| MPHOSPH9 10198 | A2 |
| MPL 4352       | A2 |
| MPP6 51678     | A2 |
| MPPED2 744     | A2 |
| MPRIP 23164    | A2 |
| MPV17L2 84769  | A2 |
| MPV17 4358     | A2 |
| MR1 3140       | A2 |
| MRAS 22808     | A2 |
| MRC1 4360      | A2 |
| MRGPRF 116535  | A2 |
| MRGPRX2 117194 | A2 |
| MRGPRX3 117195 | A2 |
| MRPL12 6182    | A2 |
| MRPL13 28998   | A2 |
| MRPL14 64928   | A2 |
| MRPL15 29088   | A2 |
| MRPL17 63875   | A2 |
| MRPL19 9801    | A2 |
| MRPL22 29093   | A2 |
| MRPL24 79590   | A2 |
| MRPL28 10573   | A2 |
| MRPL36 64979   | A2 |
| MRPL3 11222    | A2 |
| MRPL42 28977   | A2 |
| MRPL47 57129   | A2 |
| MRPL49 740     | A2 |
| MRPL51 51258   | A2 |
| MRPL55 128308  | A2 |
| MRPL9 65005    | A2 |
| MRPS10 55173   | A2 |
| MRPS14 63931   | A2 |
| MRPS16 51021   | A2 |
| MRPS21 54460   | A2 |
| MRPS23 51649   | A2 |
| MRPS31 10240   | A2 |
| MRPS34 65993   | A2 |
| MRPS35 60488   | A2 |
| MSH2 4436      | A2 |
| MSH6 2956      | A2 |
| MSI2 124540    | A2 |
| MSR1 4481      | A2 |
| MSRA 4482      | A2 |
| MSRB3 253827   | A2 |
| MST1P9 11223   | A2 |
| MST1R 4486     | A2 |
| MT1E 4493      | A2 |
| MT1L 4500      | A2 |
| MT1M 4499      | A2 |
| MT1X 4501      | A2 |
| MTBP 27085     | A2 |

|                |    |
|----------------|----|
| MTCH2 23788    | A2 |
| MTDH 92140     | A2 |
| MTERFD1 51001  | A2 |
| MTERFD2 130916 | A2 |
| MTFR1 9650     | A2 |
| MTHFD2 10797   | A2 |
| MTMR12 54545   | A2 |
| MTMR15 22909   | A2 |
| MTMR3 8897     | A2 |
| MTMR8 55613    | A2 |
| MTMR9L 339483  | A2 |
| MTMR9 66036    | A2 |
| MTP18 51537    | A2 |
| MTUS1 57509    | A2 |
| MTX1 4580      | A2 |
| MTX2 10651     | A2 |
| MUC1 4582      | A2 |
| MUM1 84939     | A2 |
| MVP 9961       | A2 |
| MX1 4599       | A2 |
| MXD3 83463     | A2 |
| MXI1 4601      | A2 |
| MXRA5 25878    | A2 |
| MYADM 91663    | A2 |
| MYBL2 4605     | A2 |
| MYB 4602       | A2 |
| MYCBP2 23077   | A2 |
| MYCBP 26292    | A2 |
| MYCT1 80177    | A2 |
| MYC 4609       | A2 |
| MYD88 4615     | A2 |
| MYEF2 50804    | A2 |
| MYH10 4628     | A2 |
| MYO19 80179    | A2 |
| MYO1D 4642     | A2 |
| MYO1H 283446   | A2 |
| MYO5B 4645     | A2 |
| MYO6 4646      | A2 |
| MYOCD 93649    | A2 |
| MYOC 4653      | A2 |
| N4BP2L2 10443  | A2 |
| N4BP3 23138    | A2 |
| NAA15 80155    | A2 |
| NAA16 79612    | A2 |
| NAA38 51691    | A2 |
| NAALAD2 10003  | A2 |
| NAALADL1 10004 | A2 |
| NACAD 23148    | A2 |
| NACA 4666      | A2 |
| NACC1 112939   | A2 |
| NAGK 55577     | A2 |

|                      |    |
|----------------------|----|
| NANS 54187           | A2 |
| NAPIL2 4674          | A2 |
| NAPA 8775            | A2 |
| NARFL 64428          | A2 |
| NARS 4677            | A2 |
| NAT14 57106          | A2 |
| NAT15 79903          | A2 |
| NAT6 24142           | A2 |
| NAT8L 339983         | A2 |
| NAV2 89797           | A2 |
| NBEAL1 65065         | A2 |
| NCAM1 4684           | A2 |
| NCAPD2 9918          | A2 |
| NCAPD3 23310         | A2 |
| NCAPG2 54892         | A2 |
| NCAPG 64151          | A2 |
| NCAPH 23397          | A2 |
| NCBP2 22916          | A2 |
| NCDN 23154           | A2 |
| NCEH1 57552          | A2 |
| NCKAP5L 57701        | A2 |
| NCLN 56926           | A2 |
| NCOA1 8648           | A2 |
| NCOA4 8031           | A2 |
| NCOA7 135112         | A2 |
| NCRNA00032 158035    | A2 |
| NCRNA00092 100188953 | A2 |
| NCRNA00120 55389     | A2 |
| NCRNA00152 112597    | A2 |
| NCRNA00176 284739    | A2 |
| NCRNA00182 100302692 | A2 |
| NCRNA00188 125144    | A2 |
| NCRNA00204B 286967   | A2 |
| NCRNA00219 114915    | A2 |
| NCSTN 23385          | A2 |
| NDC80 10403          | A2 |
| NDE1 54820           | A2 |
| NDN 4692             | A2 |
| NDOR1 27158          | A2 |
| NDRG3 57446          | A2 |
| NDST1 3340           | A2 |
| NDUFA13 51079        | A2 |
| NDUFA7 4701          | A2 |
| NDUFB4 4710          | A2 |
| NDUFB9 4715          | A2 |
| NDUFS2 4720          | A2 |
| NDUFS4 4724          | A2 |
| NDUFV2 4729          | A2 |
| NECAB3 63941         | A2 |
| NECAP1 25977         | A2 |
| NEDD9 4739           | A2 |

|                 |    |
|-----------------|----|
| NEIL1 79661     | A2 |
| NEK1 4750       | A2 |
| NEK2 4751       | A2 |
| NEK3 4752       | A2 |
| NEK5 341676     | A2 |
| NEK7 140609     | A2 |
| NEK9 91754      | A2 |
| NES 10763       | A2 |
| NEU1 4758       | A2 |
| NEURL2 140825   | A2 |
| NEURL4 84461    | A2 |
| NFATC2 4773     | A2 |
| NFATC3 4775     | A2 |
| NFIB 4781       | A2 |
| NFIL3 4783      | A2 |
| NFKBIE 4794     | A2 |
| NFKBIL2 4796    | A2 |
| NFU1 27247      | A2 |
| NFYA 4800       | A2 |
| NGF 4803        | A2 |
| NHEJ1 79840     | A2 |
| NHLRC3 387921   | A2 |
| NHP2 55651      | A2 |
| NICN1 84276     | A2 |
| NINJ1 4814      | A2 |
| NIPA1 123606    | A2 |
| NIPSNAP3B 55335 | A2 |
| NIT2 56954      | A2 |
| NKAIN1 79570    | A2 |
| NKAIN2 154215   | A2 |
| NKAPL 222698    | A2 |
| NKAP 79576      | A2 |
| NKD2 85409      | A2 |
| NKTR 4820       | A2 |
| NKX3-2 579      | A2 |
| NLGN1 22871     | A2 |
| NLGN3 54413     | A2 |
| NLGN4X 57502    | A2 |
| NLK 51701       | A2 |
| NLN 57486       | A2 |
| NLRP1 22861     | A2 |
| NLRX1 79671     | A2 |
| NMBR 4829       | A2 |
| NME1 4830       | A2 |
| NME3 4832       | A2 |
| NME4 4833       | A2 |
| NME7 29922      | A2 |
| NMNAT2 23057    | A2 |
| NMRAL1 57407    | A2 |
| NMT1 4836       | A2 |
| NMT2 9397       | A2 |

|                |    |
|----------------|----|
| NOB1 28987     | A2 |
| NOC2L 26155    | A2 |
| NOC4L 79050    | A2 |
| NOD1 10392     | A2 |
| NODAL 4838     | A2 |
| NOL10 79954    | A2 |
| NOMO2 283820   | A2 |
| NOMO3 408050   | A2 |
| NOP16 51491    | A2 |
| NOP2 4839      | A2 |
| NOP56 10528    | A2 |
| NOP58 51602    | A2 |
| NOTCH4 4855    | A2 |
| NPAS4 266743   | A2 |
| NPIP 9284      | A2 |
| NPM2 10361     | A2 |
| NPNT 255743    | A2 |
| NPR2 4882      | A2 |
| NPRL2 10641    | A2 |
| NPY2R 4887     | A2 |
| NR1D2 9975     | A2 |
| NR1H3 10062    | A2 |
| NR2C2AP 126382 | A2 |
| NR2C2 7182     | A2 |
| NR2F6 2063     | A2 |
| NR4A1 3164     | A2 |
| NR4A3 8013     | A2 |
| NR5A2 2494     | A2 |
| NRAS 4893      | A2 |
| NRBP1 29959    | A2 |
| NRBP2 340371   | A2 |
| NRF1 4899      | A2 |
| NRG1 3084      | A2 |
| NRG2 9542      | A2 |
| NRM 11270      | A2 |
| NRN1 51299     | A2 |
| NRSN2 80023    | A2 |
| NSDHL 50814    | A2 |
| NSL1 25936     | A2 |
| NSMCE1 197370  | A2 |
| NSMCE2 286053  | A2 |
| NSUN5 55695    | A2 |
| NT5C3 51251    | A2 |
| NT5DC3 51559   | A2 |
| NTF3 4908      | A2 |
| NTHL1 4913     | A2 |
| NTNG2 84628    | A2 |
| NTRK2 4915     | A2 |
| NUAK2 81788    | A2 |
| NUBP1 4682     | A2 |
| NUBP2 10101    | A2 |

|                |    |
|----------------|----|
| NUCB2 4925     | A2 |
| NUDT11 55190   | A2 |
| NUDT16L1 84309 | A2 |
| NUDT16 131870  | A2 |
| NUDT19 390916  | A2 |
| NUDT1 4521     | A2 |
| NUDT22 84304   | A2 |
| NUDT3 11165    | A2 |
| NUDT5 11164    | A2 |
| NUDT9P1 119369 | A2 |
| NUF2 83540     | A2 |
| NUP107 57122   | A2 |
| NUP133 55746   | A2 |
| NUP205 23165   | A2 |
| NUP210 23225   | A2 |
| NUP37 79023    | A2 |
| NUP62 23636    | A2 |
| NUP85 79902    | A2 |
| NUPL1 9818     | A2 |
| NUSAP1 51203   | A2 |
| NUTF2 10204    | A2 |
| NVL 4931       | A2 |
| NXNL1 115861   | A2 |
| NYNRIN 57523   | A2 |
| OAS1 4938      | A2 |
| OAS2 4939      | A2 |
| OAS3 4940      | A2 |
| OAZ3 51686     | A2 |
| OBFC1 79991    | A2 |
| OBFC2B 79035   | A2 |
| OCIAD2 132299  | A2 |
| ODF2 4957      | A2 |
| ODF3L1 161753  | A2 |
| ODZ1 10178     | A2 |
| ODZ2 57451     | A2 |
| OGN 4969       | A2 |
| OGT 8473       | A2 |
| OIP5 11339     | A2 |
| OLA1 29789     | A2 |
| OLFML2A 169611 | A2 |
| OLFML2B 25903  | A2 |
| OLR1 4973      | A2 |
| OPTN 10133     | A2 |
| OR10A3 26496   | A2 |
| OR10A6 390093  | A2 |
| OR10V1 390201  | A2 |
| OR2B6 26212    | A2 |
| OR2L13 284521  | A2 |
| OR2L3 391192   | A2 |
| OR52N4 390072  | A2 |
| OR5K1 26339    | A2 |

|                |    |
|----------------|----|
| OR5K2 402135   | A2 |
| ORAI2 80228    | A2 |
| ORC1L 4998     | A2 |
| ORC6L 23594    | A2 |
| ORMDL2 29095   | A2 |
| OSBPL1A 114876 | A2 |
| OSBPL9 114883  | A2 |
| OST4 100128731 | A2 |
| OSTC 58505     | A2 |
| OTUB1 55611    | A2 |
| OTUB2 78990    | A2 |
| OTUD7A 161725  | A2 |
| OTUD7B 56957   | A2 |
| OVCA2 124641   | A2 |
| OVCH2 341277   | A2 |
| OVOL1 5017     | A2 |
| OXCT1 5019     | A2 |
| OXGR1 27199    | A2 |
| OXSM 54995     | A2 |
| P2RX4 5025     | A2 |
| P2RY12 64805   | A2 |
| P2RY13 53829   | A2 |
| P2RY14 9934    | A2 |
| P4HA2 8974     | A2 |
| P4HA3 283208   | A2 |
| P4HB 5034      | A2 |
| PA2G4P4 647033 | A2 |
| PABPC4L 132430 | A2 |
| PACRGL 133015  | A2 |
| PACRG 135138   | A2 |
| PACSIN1 29993  | A2 |
| PAFAH1B1 5048  | A2 |
| PAFAH2 5051    | A2 |
| PAICS 10606    | A2 |
| PAIP1 10605    | A2 |
| PAK2 5062      | A2 |
| PAK4 10298     | A2 |
| PALMD 54873    | A2 |
| PAN2 9924      | A2 |
| PANK3 79646    | A2 |
| PANX1 24145    | A2 |
| PAPLN 89932    | A2 |
| PAPPA2 60676   | A2 |
| PAR1 145624    | A2 |
| PAR5 8123      | A2 |
| PARD3B 117583  | A2 |
| PARN 5073      | A2 |
| PARP12 64761   | A2 |
| PARP14 54625   | A2 |
| PARP9 83666    | A2 |
| PATZ1 23598    | A2 |

|                |    |
|----------------|----|
| PAX2 5076      | A2 |
| PAX9 5083      | A2 |
| PAXIP1 22976   | A2 |
| PBK 55872      | A2 |
| PBX1 5087      | A2 |
| PCBP3 54039    | A2 |
| PCCA 5095      | A2 |
| PCDH17 27253   | A2 |
| PCDH18 54510   | A2 |
| PCDH19 57526   | A2 |
| PCDHB12 56124  | A2 |
| PCDHB15 56121  | A2 |
| PCDHB18 54660  | A2 |
| PCDHB19P 84054 | A2 |
| PCDHB7 56129   | A2 |
| PCDHGA11 56105 | A2 |
| PCDHGA2 56113  | A2 |
| PCDHGA6 56109  | A2 |
| PCDHGA9 56107  | A2 |
| PCDHGB6 56100  | A2 |
| PCGF5 84333    | A2 |
| PCK1 5105      | A2 |
| PCNA 5111      | A2 |
| PCNXL3 399909  | A2 |
| PCYOX1L 78991  | A2 |
| PCYT1B 9468    | A2 |
| PC 5091        | A2 |
| PDCD10 11235   | A2 |
| PDCD6 10016    | A2 |
| PDCL3 79031    | A2 |
| PDE11A 50940   | A2 |
| PDE1B 5153     | A2 |
| PDE2A 5138     | A2 |
| PDE3B 5140     | A2 |
| PDE5A 8654     | A2 |
| PDE6D 5147     | A2 |
| PDE8A 5151     | A2 |
| PDF 64146      | A2 |
| PDGFA 5154     | A2 |
| PDGFRA 5156    | A2 |
| PDIA3P 171423  | A2 |
| PDIA3 2923     | A2 |
| PDIA4 9601     | A2 |
| PDIA5 10954    | A2 |
| PDIA6 10130    | A2 |
| PDK2 5164      | A2 |
| PDK3 5165      | A2 |
| PDK4 5166      | A2 |
| PDP2 57546     | A2 |
| PDPR 55066     | A2 |
| PDSS1 23590    | A2 |



|               |    |
|---------------|----|
| PDXDC1 23042  | A2 |
| PDXP 57026    | A2 |
| PDZD11 51248  | A2 |
| PDZD4 57595   | A2 |
| PEAR1 375033  | A2 |
| PELI1 57162   | A2 |
| PEMT 10400    | A2 |
| PER2 8864     | A2 |
| PER3 8863     | A2 |
| PEX11B 8799   | A2 |
| PEX13 5194    | A2 |
| PEX5 5830     | A2 |
| PFDN2 5202    | A2 |
| PFDN5 5204    | A2 |
| PFKFB1 5207   | A2 |
| PFKFB3 5209   | A2 |
| PFKFB4 5210   | A2 |
| PFN1 5216     | A2 |
| PFN2 5217     | A2 |
| PGA3 643834   | A2 |
| PGAM1 5223    | A2 |
| PGAM5 192111  | A2 |
| PGAP1 80055   | A2 |
| PGBD4 161779  | A2 |
| PGGT1B 5229   | A2 |
| PGK1 5230     | A2 |
| PGM1 5236     | A2 |
| PGM2 55276    | A2 |
| PGM3 5238     | A2 |
| PGM5P2 595135 | A2 |
| PGM5 5239     | A2 |
| PGPEP1 54858  | A2 |
| PGP 283871    | A2 |
| PHACTR2 9749  | A2 |
| PHF14 9678    | A2 |
| PHF16 9767    | A2 |
| PHF1 5252     | A2 |
| PHF21A 51317  | A2 |
| PHF2 5253     | A2 |
| PHF7 51533    | A2 |
| PHKA2 5256    | A2 |
| PHKG2 5261    | A2 |
| PHLDA1 22822  | A2 |
| PHLDA3 23612  | A2 |
| PHLDB2 90102  | A2 |
| PHLPP1 23239  | A2 |
| PHTF1 10745   | A2 |
| PHYHD1 254295 | A2 |
| PHYHIPL 84457 | A2 |
| PHYHIP 9796   | A2 |
| PI15 51050    | A2 |

|                |    |
|----------------|----|
| PI4KAP1 728233 | A2 |
| PI4KAP2 375133 | A2 |
| PICALM 8301    | A2 |
| PIF1 80119     | A2 |
| PIGC 5279      | A2 |
| PIGL 9487      | A2 |
| PIGM 93183     | A2 |
| PIGO 84720     | A2 |
| PIGQ 9091      | A2 |
| PIGW 284098    | A2 |
| PIGX 54965     | A2 |
| PIK3C2B 5287   | A2 |
| PIK3C2G 5288   | A2 |
| PIK3CA 5290    | A2 |
| PIK3IP1 113791 | A2 |
| PIK3R2 5296    | A2 |
| PIK3R3 8503    | A2 |
| PIKFYVE 200576 | A2 |
| PINK1 65018    | A2 |
| PINX1 54984    | A2 |
| PIP4K2C 79837  | A2 |
| PIP5K1A 8394   | A2 |
| PIPSL 266971   | A2 |
| PISD 23761     | A2 |
| PITPNM2 57605  | A2 |
| PITX1 5307     | A2 |
| PIWIL4 143689  | A2 |
| PJA2 9867      | A2 |
| PKD1L2 114780  | A2 |
| PKD1L3 342372  | A2 |
| PKIB 5570      | A2 |
| PKN2 5586      | A2 |
| PKN3 29941     | A2 |
| PL-5283 647087 | A2 |
| PLA2G16 11145  | A2 |
| PLA2G4F 255189 | A2 |
| PLA2G6 8398    | A2 |
| PLA2R1 22925   | A2 |
| PLAA 9373      | A2 |
| PLAC1 10761    | A2 |
| PLAC2 257000   | A2 |
| PLAUR 5329     | A2 |
| PLAU 5328      | A2 |
| PLB1 151056    | A2 |
| PLCB3 5331     | A2 |
| PLCD1 5333     | A2 |
| PLCD3 113026   | A2 |
| PLCH2 9651     | A2 |
| PLCL2 23228    | A2 |
| PLCXD3 345557  | A2 |
| PLCZ1 89869    | A2 |

|                 |    |
|-----------------|----|
| PLEK2 26499     | A2 |
| PLEKHA4 57664   | A2 |
| PLEKHA7 144100  | A2 |
| PLEKHA8 84725   | A2 |
| PLEKHF2 79666   | A2 |
| PLEKHG1 57480   | A2 |
| PLEKHG5 57449   | A2 |
| PLEKHM1P 440456 | A2 |
| PLEKHM1 9842    | A2 |
| PLEKHN1 84069   | A2 |
| PLIN2 123       | A2 |
| PLIN3 10226     | A2 |
| PLK1 5347       | A2 |
| PLK3 1263       | A2 |
| PLK4 10733      | A2 |
| PLLP 51090      | A2 |
| PLS3 5358       | A2 |
| PLTP 5360       | A2 |
| PLXNA3 55558    | A2 |
| PLXNC1 10154    | A2 |
| PM20D2 135293   | A2 |
| PMAIP1 5366     | A2 |
| PMCH 5367       | A2 |
| PMS2L1 5379     | A2 |
| PMS2L4 5382     | A2 |
| PNKD 25953      | A2 |
| PNKP 11284      | A2 |
| PNPLA2 57104    | A2 |
| PNPLA7 375775   | A2 |
| PNP 4860        | A2 |
| POC1A 25886     | A2 |
| PODXL2 50512    | A2 |
| POGK 57645      | A2 |
| POLA2 23649     | A2 |
| POLD1 5424      | A2 |
| POLD2 5425      | A2 |
| POLD4 57804     | A2 |
| POLE2 5427      | A2 |
| POLE3 54107     | A2 |
| POLE 5426       | A2 |
| POLI 11201      | A2 |
| POLL 27343      | A2 |
| POLQ 10721      | A2 |
| POLR1E 64425    | A2 |
| POLR2D 5433     | A2 |
| POLR2E 5434     | A2 |
| POLR2G 5436     | A2 |
| POLR2H 5437     | A2 |
| POLR2J4 84820   | A2 |
| POLR2J 5439     | A2 |
| POLR2K 5440     | A2 |

|                   |    |
|-------------------|----|
| POLR3K 51728      | A2 |
| POM121L9P 29774   | A2 |
| POMP 51371        | A2 |
| POP1 10940        | A2 |
| POP4 10775        | A2 |
| POP7 10248        | A2 |
| POSTN 10631       | A2 |
| POU2F1 5451       | A2 |
| PP14571 100130449 | A2 |
| PPA2 27068        | A2 |
| PPAP2A 8611       | A2 |
| PPAPDC1A 196051   | A2 |
| PPARA 5465        | A2 |
| PPARGC1B 133522   | A2 |
| PPCS 79717        | A2 |
| PPDPF 79144       | A2 |
| PPFIA3 8541       | A2 |
| PPIAL4G 644591    | A2 |
| PPIA 5478         | A2 |
| PPIB 5479         | A2 |
| PPIH 10465        | A2 |
| PPIL1 51645       | A2 |
| PPIL2 23759       | A2 |
| PPIL5 122769      | A2 |
| PPM1G 5496        | A2 |
| PPM1J 333926      | A2 |
| PPOX 5498         | A2 |
| PPP1CA 5499       | A2 |
| PPP1R10 5514      | A2 |
| PPP1R11 6992      | A2 |
| PPP1R12A 4659     | A2 |
| PPP1R12B 4660     | A2 |
| PPP1R14A 94274    | A2 |
| PPP1R14B 26472    | A2 |
| PPP1R15A 23645    | A2 |
| PPP1R16B 26051    | A2 |
| PPP1R3E 90673     | A2 |
| PPP1R9B 84687     | A2 |
| PPP2CB 5516       | A2 |
| PPP2R1A 5518      | A2 |
| PPP2R1B 5519      | A2 |
| PPP2R2B 5521      | A2 |
| PPP2R2C 5522      | A2 |
| PPP2R4 5524       | A2 |
| PPP2R5E 5529      | A2 |
| PPP3CC 5533       | A2 |
| PPP5C 5536        | A2 |
| PPPDE1 51029      | A2 |
| PPT1 5538         | A2 |
| PPWD1 23398       | A2 |
| PQLC1 80148       | A2 |

|                 |    |
|-----------------|----|
| PQLC2 54896     | A2 |
| PRAF2 11230     | A2 |
| PRC1 9055       | A2 |
| PRCC 5546       | A2 |
| PRDM11 56981    | A2 |
| PRDM16 63976    | A2 |
| PRDM2 7799      | A2 |
| PRDM5 11107     | A2 |
| PRDM8 56978     | A2 |
| PRDX2 7001      | A2 |
| PRDX4 10549     | A2 |
| PRELID1 27166   | A2 |
| PREX2 80243     | A2 |
| PRICKLE2 166336 | A2 |
| PRIM2 5558      | A2 |
| PRKAG2 51422    | A2 |
| PRKAR1B 5575    | A2 |
| PRKAR2B 5577    | A2 |
| PRKCA 5578      | A2 |
| PRKCH 5583      | A2 |
| PRKD1 5587      | A2 |
| PRKD3 23683     | A2 |
| PRKDC 5591      | A2 |
| PRMT10 90826    | A2 |
| PROKR1 10887    | A2 |
| PROM2 150696    | A2 |
| PROX1 5629      | A2 |
| PRPF19 27339    | A2 |
| PRPS1 5631      | A2 |
| PRR13 54458     | A2 |
| PRR14 78994     | A2 |
| PRR15 222171    | A2 |
| PRR19 284338    | A2 |
| PRR7 80758      | A2 |
| PRRC1 133619    | A2 |
| PRRG1 5638      | A2 |
| PRRG3 79057     | A2 |
| PRRT3 285368    | A2 |
| PRSS50 29122    | A2 |
| PRSS55 203074   | A2 |
| PRSS8 5652      | A2 |
| PRUNE 58497     | A2 |
| PSEN1 5663      | A2 |
| PSEN2 5664      | A2 |
| PSMA2 5683      | A2 |
| PSMA3 5684      | A2 |
| PSMA4 5685      | A2 |
| PSMA6 5687      | A2 |
| PSMA7 5688      | A2 |
| PSMB2 5690      | A2 |
| PSMB3 5691      | A2 |

|               |    |
|---------------|----|
| PSMB4 5692    | A2 |
| PSMB5 5693    | A2 |
| PSMC2 5701    | A2 |
| PSMC3IP 29893 | A2 |
| PSMC6 5706    | A2 |
| PSMD10 5716   | A2 |
| PSMD11 5717   | A2 |
| PSMD12 5718   | A2 |
| PSMD1 5707    | A2 |
| PSMD2 5708    | A2 |
| PSMD4 5710    | A2 |
| PSMD5 5711    | A2 |
| PSME2 5721    | A2 |
| PSME3 10197   | A2 |
| PSME4 23198   | A2 |
| PSMG3 84262   | A2 |
| PSPC1 55269   | A2 |
| PSRC1 84722   | A2 |
| PTAR1 375743  | A2 |
| PTCD1 26024   | A2 |
| PTCH2 8643    | A2 |
| PTCHD1 139411 | A2 |
| PTEN 5728     | A2 |
| PTGDS 5730    | A2 |
| PTGER3 5733   | A2 |
| PTGER4 5734   | A2 |
| PTK2 5747     | A2 |
| PTK7 5754     | A2 |
| PTMA 5757     | A2 |
| PTMS 5763     | A2 |
| PTN 5764      | A2 |
| PTPLAD1 51495 | A2 |
| PTPLA 9200    | A2 |
| PTPN11 5781   | A2 |
| PTPN14 5784   | A2 |
| PTPN4 5775    | A2 |
| PTPN6 5777    | A2 |
| PTPRG 5793    | A2 |
| PTPRS 5802    | A2 |
| PTRF 284119   | A2 |
| PTRH1 138428  | A2 |
| PTS 5805      | A2 |
| PTTG1IP 754   | A2 |
| PTTG1 9232    | A2 |
| PTTG3P 26255  | A2 |
| PUF60 22827   | A2 |
| PUS7L 83448   | A2 |
| PUS7 54517    | A2 |
| PUSL1 126789  | A2 |
| PVRL2 5819    | A2 |
| PVRL4 81607   | A2 |

|                 |    |
|-----------------|----|
| PXN 5829        | A2 |
| PYCARD 29108    | A2 |
| PYCR2 29920     | A2 |
| PYCRL 65263     | A2 |
| PYGO2 90780     | A2 |
| ProSAPiP 9762   | A2 |
| QKI 9444        | A2 |
| QTRTD1 79691    | A2 |
| R3HDM1 23518    | A2 |
| RAB10 10890     | A2 |
| RAB11FIP3 9727  | A2 |
| RAB11FIP4 84440 | A2 |
| RAB13 5872      | A2 |
| RAB17 64284     | A2 |
| RAB1A 5861      | A2 |
| RAB25 57111     | A2 |
| RAB26 25837     | A2 |
| RAB28 9364      | A2 |
| RAB2A 5862      | A2 |
| RAB31 11031     | A2 |
| RAB33A 9363     | A2 |
| RAB3D 9545      | A2 |
| RAB3IP 117177   | A2 |
| RAB40A 142684   | A2 |
| RAB40B 10966    | A2 |
| RAB40C 57799    | A2 |
| RAB4B 53916     | A2 |
| RAB6A 5870      | A2 |
| RAB9B 51209     | A2 |
| RABEPK 10244    | A2 |
| RABL5 64792     | A2 |
| RAC3 5881       | A2 |
| RACGAP1P 83956  | A2 |
| RACGAP1 29127   | A2 |
| RAD21 5885      | A2 |
| RAD51AP1 10635  | A2 |
| RAD51 5888      | A2 |
| RAD54B 25788    | A2 |
| RAD54L2 23132   | A2 |
| RAD54L 8438     | A2 |
| RADIL 55698     | A2 |
| RAE1 8480       | A2 |
| RAET1K 646024   | A2 |
| RAG1AP1 55974   | A2 |
| RAI14 26064     | A2 |
| RAI2 10742      | A2 |
| RALA 5898       | A2 |
| RALGDS 5900     | A2 |
| RALGPS2 55103   | A2 |
| RALY 22913      | A2 |
| RANBP10 57610   | A2 |

|                 |    |
|-----------------|----|
| RANBP17 64901   | A2 |
| RANBP1 5902     | A2 |
| RANBP9 10048    | A2 |
| RANGAP1 5905    | A2 |
| RAN 5901        | A2 |
| RAP2C 57826     | A2 |
| RAPGEF1 2889    | A2 |
| RARB 5915       | A2 |
| RARRES2 5919    | A2 |
| RARRES3 5920    | A2 |
| RARS 5917       | A2 |
| RASA2 5922      | A2 |
| RASA4 10156     | A2 |
| RASGEF1B 153020 | A2 |
| RASGRP2 10235   | A2 |
| RASIP1 54922    | A2 |
| RASL10A 10633   | A2 |
| RASL11B 65997   | A2 |
| RASSF1 11186    | A2 |
| RASSF3 283349   | A2 |
| RASSF6 166824   | A2 |
| RAVER1 125950   | A2 |
| RAVER2 55225    | A2 |
| RAX2 84839      | A2 |
| RBBP4 5928      | A2 |
| RBKS 64080      | A2 |
| RBL1 5933       | A2 |
| RBM33 155435    | A2 |
| RBM34 23029     | A2 |
| RBM47 54502     | A2 |
| RBM4 5936       | A2 |
| RBM6 10180      | A2 |
| RBM7 10179      | A2 |
| RBM8A 9939      | A2 |
| RBMS3 27303     | A2 |
| RBMXL1 494115   | A2 |
| RBP7 116362     | A2 |
| RBPMS 11030     | A2 |
| RBX1 9978       | A2 |
| RCAN1 1827      | A2 |
| RCC1 1104       | A2 |
| RCC2 55920      | A2 |
| RCSD1 92241     | A2 |
| RCVRN 5957      | A2 |
| RDH13 112724    | A2 |
| RDM1 201299     | A2 |
| RECK 8434       | A2 |
| RECQL4 9401     | A2 |
| REEP4 80346     | A2 |
| RELL2 285613    | A2 |
| RELN 5649       | A2 |



|                |    |
|----------------|----|
| RELT 84957     | A2 |
| REM2 161253    | A2 |
| REPIN1 29803   | A2 |
| REPS2 9185     | A2 |
| RERE 473       | A2 |
| RERGL 79785    | A2 |
| REV3L 5980     | A2 |
| RFC2 5982      | A2 |
| RFC3 5983      | A2 |
| RFC4 5984      | A2 |
| RFTN2 130132   | A2 |
| RFX2 5990      | A2 |
| RFXANK 8625    | A2 |
| RG9MTD2 93587  | A2 |
| RG9MTD3 158234 | A2 |
| RGL1 23179     | A2 |
| RGMA 56963     | A2 |
| RGMB 285704    | A2 |
| RGPD3 653489   | A2 |
| RGPD4 285190   | A2 |
| RGPD5 84220    | A2 |
| RGPD6 729540   | A2 |
| RGS10 6001     | A2 |
| RGS12 6002     | A2 |
| RGS14 10636    | A2 |
| RGS19 10287    | A2 |
| RGS4 5999      | A2 |
| RGS6 9628      | A2 |
| RGS7BP 401190  | A2 |
| RHBDD2 57414   | A2 |
| RHBDD3 25807   | A2 |
| RHBDF1 64285   | A2 |
| RHBDF2 79651   | A2 |
| RHBDL1 9028    | A2 |
| RHBDL2 54933   | A2 |
| RHCE 6006      | A2 |
| RHOD 29984     | A2 |
| RHOF 54509     | A2 |
| RHOT2 89941    | A2 |
| RHOXF1 158800  | A2 |
| RHPN1 114822   | A2 |
| RIC3 79608     | A2 |
| RILPL1 353116  | A2 |
| RILPL2 196383  | A2 |
| RIMS3 9783     | A2 |
| RIMS4 140730   | A2 |
| RINT1 60561    | A2 |
| RIPK4 54101    | A2 |
| RIT1 6016      | A2 |
| RMI1 80010     | A2 |
| RMND5B 64777   | A2 |

|                  |    |
|------------------|----|
| RNASE13 440163   | A2 |
| RNASE1 6035      | A2 |
| RNASEH2A 10535   | A2 |
| RND1 27289       | A2 |
| RNF103 7844      | A2 |
| RNF112 7732      | A2 |
| RNF115 27246     | A2 |
| RNF11 26994      | A2 |
| RNF125 54941     | A2 |
| RNF138P1 379013  | A2 |
| RNF139 11236     | A2 |
| RNF145 153830    | A2 |
| RNF146 81847     | A2 |
| RNF149 284996    | A2 |
| RNF150 57484     | A2 |
| RNF157 114804    | A2 |
| RNF181 51255     | A2 |
| RNF185 91445     | A2 |
| RNF186 54546     | A2 |
| RNF208 727800    | A2 |
| RNF213 57674     | A2 |
| RNF217 154214    | A2 |
| RNF34 80196      | A2 |
| RNF40 9810       | A2 |
| RNF41 10193      | A2 |
| RNF4 6047        | A2 |
| RNF7 9616        | A2 |
| RNFT2 84900      | A2 |
| RNLS 55328       | A2 |
| RNPEP 6051       | A2 |
| RNPS1 10921      | A2 |
| ROBLD3 28956     | A2 |
| ROCK2 9475       | A2 |
| ROR1 4919        | A2 |
| ROR2 4920        | A2 |
| RPA3 6119        | A2 |
| RPAP3 79657      | A2 |
| RPE65 6121       | A2 |
| RPGRIP1L 23322   | A2 |
| RPGR 6103        | A2 |
| RPL10A 4736      | A2 |
| RPL11 6135       | A2 |
| RPL15 6138       | A2 |
| RPL21P44 402176  | A2 |
| RPL21 6144       | A2 |
| RPL22 6146       | A2 |
| RPL23AP53 644128 | A2 |
| RPL23AP64 649946 | A2 |
| RPL26L1 51121    | A2 |
| RPL26 6154       | A2 |
| RPL31P11 641311  | A2 |

|                |    |
|----------------|----|
| RPL32 6161     | A2 |
| RPL34 6164     | A2 |
| RPL39L 116832  | A2 |
| RPL3 6122      | A2 |
| RPL4 6124      | A2 |
| RPL5 6125      | A2 |
| RPLP0P2 113157 | A2 |
| RPN1 6184      | A2 |
| RPN2 6185      | A2 |
| RPP21 79897    | A2 |
| RPP40 10799    | A2 |
| RPRD2 23248    | A2 |
| RPS13 6207     | A2 |
| RPS14 6208     | A2 |
| RPS20 6224     | A2 |
| RPS23 6228     | A2 |
| RPS25 6230     | A2 |
| RPS27A 6233    | A2 |
| RPS3A 6189     | A2 |
| RPS6KA1 6195   | A2 |
| RPS6KA5 9252   | A2 |
| RPS6KB2 6199   | A2 |
| RPS9 6203      | A2 |
| RPUSD1 113000  | A2 |
| RRAGD 58528    | A2 |
| RRAS2 22800    | A2 |
| RRM1 6240      | A2 |
| RRM2 6241      | A2 |
| RRN3 54700     | A2 |
| RRS1 23212     | A2 |
| RSAD2 91543    | A2 |
| RSPH1 89765    | A2 |
| RSPO3 84870    | A2 |
| RTCD1 8634     | A2 |
| RTKN2 219790   | A2 |
| RTKN 6242      | A2 |
| RTN4RL2 349667 | A2 |
| RTN4 57142     | A2 |
| RUNX1T1 862    | A2 |
| RUNX2 860      | A2 |
| RUSC2 9853     | A2 |
| RUVBL1 8607    | A2 |
| RUVBL2 10856   | A2 |
| RXFP3 51289    | A2 |
| S100A11 6282   | A2 |
| S100A14 57402  | A2 |
| S100A16 140576 | A2 |
| S1PR1 1901     | A2 |
| SAA2 6289      | A2 |
| SAA4 6291      | A2 |
| SAAL1 113174   | A2 |

|                 |    |
|-----------------|----|
| SAC3D1 29901    | A2 |
| SACS 26278      | A2 |
| SALL4 57167     | A2 |
| SAMD11 148398   | A2 |
| SAMD14 201191   | A2 |
| SAMD1 90378     | A2 |
| SAMD4A 23034    | A2 |
| SAMSN1 64092    | A2 |
| SAP130 79595    | A2 |
| SAP30L 79685    | A2 |
| SAP30 8819      | A2 |
| SAPS1 22870     | A2 |
| SAR1B 51128     | A2 |
| SARNP 84324     | A2 |
| SASS6 163786    | A2 |
| SAT2 112483     | A2 |
| SATB1 6304      | A2 |
| SBDS 51119      | A2 |
| SBF1 6305       | A2 |
| SBF2 81846      | A2 |
| SBK1 388228     | A2 |
| SC65 10609      | A2 |
| SCAMP3 10067    | A2 |
| SCAPER 49855    | A2 |
| SCARA5 286133   | A2 |
| SCARNA17 677769 | A2 |
| SCCPDH 51097    | A2 |
| SCLY 51540      | A2 |
| SCML1 6322      | A2 |
| SCN11A 11280    | A2 |
| SCN2A 6326      | A2 |
| SCN3B 55800     | A2 |
| SCN5A 6331      | A2 |
| SCNM1 79005     | A2 |
| SCO2 9997       | A2 |
| SCRN2 90507     | A2 |
| SCT 6343        | A2 |
| SDC1 6382       | A2 |
| SDF2L1 23753    | A2 |
| SDHAP1 255812   | A2 |
| SDHAP2 727956   | A2 |
| SDHAP3 728609   | A2 |
| SDHD 6392       | A2 |
| SDK1 221935     | A2 |
| SDPR 8436       | A2 |
| SDS 10993       | A2 |
| SEC11C 90701    | A2 |
| SEC13 6396      | A2 |
| SEC16B 89866    | A2 |
| SEC22C 9117     | A2 |
| SEC24D 9871     | A2 |

|                |    |
|----------------|----|
| SEC31A 22872   | A2 |
| SEC31B 25956   | A2 |
| SEC61A1 29927  | A2 |
| SEC61B 10952   | A2 |
| SECISBP2L 9728 | A2 |
| SECTM1 6398    | A2 |
| SELS 55829     | A2 |
| SELT 51714     | A2 |
| SEMA3C 10512   | A2 |
| SEMA3F 6405    | A2 |
| SEMA3G 56920   | A2 |
| SEMA5A 9037    | A2 |
| SEMA7A 8482    | A2 |
| SENP1 29843    | A2 |
| SEPHS2 22928   | A2 |
| SEPT10 151011  | A2 |
| SEPT8 23176    | A2 |
| SEPT9 10801    | A2 |
| SEPX1 51734    | A2 |
| SERINC1 57515  | A2 |
| SERINC2 347735 | A2 |
| SERP1 27230    | A2 |
| SERPINH1 871   | A2 |
| SESN1 27244    | A2 |
| SETD7 80854    | A2 |
| SETDB1 9869    | A2 |
| SETMAR 6419    | A2 |
| SETX 23064     | A2 |
| SEZ6L2 26470   | A2 |
| SF3A1 10291    | A2 |
| SF3B14 51639   | A2 |
| SF3B4 10262    | A2 |
| SFPQ 6421      | A2 |
| SFRP2 6423     | A2 |
| SFRS18 25957   | A2 |
| SFRS1 6426     | A2 |
| SFRS2B 10929   | A2 |
| SFRS2 6427     | A2 |
| SFRS4 6429     | A2 |
| SFRS9 8683     | A2 |
| SFXN1 94081    | A2 |
| SFXN2 118980   | A2 |
| SFXN5 94097    | A2 |
| SGCE 8910      | A2 |
| SGCZ 137868    | A2 |
| SGK1 6446      | A2 |
| SGK269 79834   | A2 |
| SGOL1 151648   | A2 |
| SGOL2 151246   | A2 |
| SGPL1 8879     | A2 |
| SGSM2 9905     | A2 |

|                 |    |
|-----------------|----|
| SH2D2A 9047     | A2 |
| SH2D4A 63898    | A2 |
| SH3BGRL 6451    | A2 |
| SH3BP2 6452     | A2 |
| SH3BP5L 80851   | A2 |
| SH3BP5 9467     | A2 |
| SH3D19 152503   | A2 |
| SH3GL1 6455     | A2 |
| SH3KBP1 30011   | A2 |
| SH3RF1 57630    | A2 |
| SH3TC2 79628    | A2 |
| SHANK3 85358    | A2 |
| SHARPIN 81858   | A2 |
| SHBG 6462       | A2 |
| SHCBP1 79801    | A2 |
| SHE 126669      | A2 |
| SHFM1 7979      | A2 |
| SHISA5 51246    | A2 |
| SHISA9 729993   | A2 |
| SHKBP1 92799    | A2 |
| SHMT1 6470      | A2 |
| SHMT2 6472      | A2 |
| SHOX 6473       | A2 |
| SHQ1 55164      | A2 |
| SHROOM2 357     | A2 |
| SHROOM4 57477   | A2 |
| SIAH2 6478      | A2 |
| SIDT1 54847     | A2 |
| SIDT2 51092     | A2 |
| SIGIRR 59307    | A2 |
| SIK3 23387      | A2 |
| SIM2 6493       | A2 |
| SIPA1L3 23094   | A2 |
| SIRT1 23411     | A2 |
| SIRT6 51548     | A2 |
| SIRT7 51547     | A2 |
| SIX4 51804      | A2 |
| SKA2 348235     | A2 |
| SKAP2 8935      | A2 |
| SKIL 6498       | A2 |
| SKINTL 391037   | A2 |
| SKI 6497        | A2 |
| SLAMF8 56833    | A2 |
| SLBP 7884       | A2 |
| SLC10A6 345274  | A2 |
| SLC11A1 6556    | A2 |
| SLC12A4 6560    | A2 |
| SLC12A6 9990    | A2 |
| SLC12A7 10723   | A2 |
| SLC12A8 84561   | A2 |
| SLC16A11 162515 | A2 |

|                 |    |
|-----------------|----|
| SLC16A12 387700 | A2 |
| SLC16A2 6567    | A2 |
| SLC16A3 9123    | A2 |
| SLC16A7 9194    | A2 |
| SLC19A1 6573    | A2 |
| SLC19A2 10560   | A2 |
| SLC19A3 80704   | A2 |
| SLC1A3 6507     | A2 |
| SLC1A4 6509     | A2 |
| SLC1A7 6512     | A2 |
| SLC22A11 55867  | A2 |
| SLC22A12 116085 | A2 |
| SLC22A18 5002   | A2 |
| SLC23A1 9963    | A2 |
| SLC24A2 25769   | A2 |
| SLC25A14 9016   | A2 |
| SLC25A15 10166  | A2 |
| SLC25A19 60386  | A2 |
| SLC25A20 788    | A2 |
| SLC25A22 79751  | A2 |
| SLC25A24 29957  | A2 |
| SLC25A25 114789 | A2 |
| SLC25A26 115286 | A2 |
| SLC25A27 9481   | A2 |
| SLC25A28 81894  | A2 |
| SLC25A30 253512 | A2 |
| SLC25A36 55186  | A2 |
| SLC25A39 51629  | A2 |
| SLC25A42 284439 | A2 |
| SLC25A5 292     | A2 |
| SLC26A10 65012  | A2 |
| SLC26A4 5172    | A2 |
| SLC27A4 10999   | A2 |
| SLC29A1 2030    | A2 |
| SLC29A3 55315   | A2 |
| SLC2A10 81031   | A2 |
| SLC2A12 154091  | A2 |
| SLC2A1 6513     | A2 |
| SLC2A4 6517     | A2 |
| SLC2A6 11182    | A2 |
| SLC30A1 7779    | A2 |
| SLC30A7 148867  | A2 |
| SLC35A3 23443   | A2 |
| SLC35B1 10237   | A2 |
| SLC35B2 347734  | A2 |
| SLC35B4 84912   | A2 |
| SLC35D1 23169   | A2 |
| SLC35E3 55508   | A2 |
| SLC35F5 80255   | A2 |
| SLC38A5 92745   | A2 |
| SLC38A7 55238   | A2 |

|                 |    |
|-----------------|----|
| SLC39A10 57181  | A2 |
| SLC39A11 201266 | A2 |
| SLC39A1 27173   | A2 |
| SLC39A3 29985   | A2 |
| SLC39A4 55630   | A2 |
| SLC39A7 7922    | A2 |
| SLC41A3 54946   | A2 |
| SLC44A1 23446   | A2 |
| SLC44A4 80736   | A2 |
| SLC47A2 146802  | A2 |
| SLC48A1 55652   | A2 |
| SLC4A2 6522     | A2 |
| SLC4A8 9498     | A2 |
| SLC5A4 6527     | A2 |
| SLC5A9 200010   | A2 |
| SLC6A16 28968   | A2 |
| SLC6A1 6529     | A2 |
| SLC6A9 6536     | A2 |
| SLC7A10 56301   | A2 |
| SLC7A11 23657   | A2 |
| SLC7A3 84889    | A2 |
| SLC7A8 23428    | A2 |
| SLC9A6 10479    | A2 |
| SLCO1A2 6579    | A2 |
| SLCO1C1 53919   | A2 |
| SLITRK2 84631   | A2 |
| SLMO2 51012     | A2 |
| SLU7 10569      | A2 |
| SMAD4 4089      | A2 |
| SMAD9 4093      | A2 |
| SMARCA4 6597    | A2 |
| SMARCB1 6598    | A2 |
| SMARCC1 6599    | A2 |
| SMARCC2 6601    | A2 |
| SMC1A 8243      | A2 |
| SMC2 10592      | A2 |
| SMC4 10051      | A2 |
| SMG5 23381      | A2 |
| SMG7 9887       | A2 |
| SMPD2 6610      | A2 |
| SMPD4 55627     | A2 |
| SMS 6611        | A2 |
| SMTN 6525       | A2 |
| SMUG1 23583     | A2 |
| SMYD3 64754     | A2 |
| SNAI2 6591      | A2 |
| SNAP47 116841   | A2 |
| SNAPC2 6618     | A2 |
| SNCG 6623       | A2 |
| SNED1 25992     | A2 |
| SNHG8 100093630 | A2 |



|                       |    |
|-----------------------|----|
| SNN 8303              | A2 |
| SNORD116-20 100033431 | A2 |
| SNRK 54861            | A2 |
| SNRNP25 79622         | A2 |
| SNRNP40 9410          | A2 |
| SNRPA1 6627           | A2 |
| SNRPB2 6629           | A2 |
| SNRPB 6628            | A2 |
| SNRPC 6631            | A2 |
| SNRPD3 6634           | A2 |
| SNRPE 6635            | A2 |
| SNRPF 6636            | A2 |
| SNRPG 6637            | A2 |
| SNTB1 6641            | A2 |
| SNTB2 6645            | A2 |
| SNTG2 54221           | A2 |
| SNX15 29907           | A2 |
| SNX18 112574          | A2 |
| SNX21 90203           | A2 |
| SNX24 28966           | A2 |
| SNX27 81609           | A2 |
| SNX29 92017           | A2 |
| SOCS3 9021            | A2 |
| SOCS5 9655            | A2 |
| SOD2 6648             | A2 |
| SOLH 6650             | A2 |
| SORBS2 8470           | A2 |
| SOS1 6654             | A2 |
| SOS2 6655             | A2 |
| SOSTDC1 25928         | A2 |
| SOX12 6666            | A2 |
| SOX17 64321           | A2 |
| SOX4 6659             | A2 |
| SOX5 6660             | A2 |
| SOX7 83595            | A2 |
| SP110 3431            | A2 |
| SPA17 53340           | A2 |
| SPAG5 10615           | A2 |
| SPATA17 128153        | A2 |
| SPATA18 132671        | A2 |
| SPATA7 55812          | A2 |
| SPATS2 65244          | A2 |
| SPC24 147841          | A2 |
| SPC25 57405           | A2 |
| SPCS1 28972           | A2 |
| SPCS2 9789            | A2 |
| SPDEF 25803           | A2 |
| SPEF1 25876           | A2 |
| SPEN 23013            | A2 |
| SPG20 23111           | A2 |
| SPHKAP 80309          | A2 |

|                |    |
|----------------|----|
| SPIN2A 54466   | A2 |
| SPINT1 6692    | A2 |
| SPINT2 10653   | A2 |
| SPIRE2 84501   | A2 |
| SPNS1 83985    | A2 |
| SPOCD1 90853   | A2 |
| SPP1 6696      | A2 |
| SPRY1 10252    | A2 |
| SPR 6697       | A2 |
| SPTBN1 6711    | A2 |
| SQRDL 58472    | A2 |
| SRA1 10011     | A2 |
| SRCAP 10847    | A2 |
| SRC 6714       | A2 |
| SRD5A3 79644   | A2 |
| SREBF1 6720    | A2 |
| SRF 6722       | A2 |
| SRGAP2 23380   | A2 |
| SRMS 6725      | A2 |
| SRP54 6729     | A2 |
| SRP72 6731     | A2 |
| SRPK2 6733     | A2 |
| SRPRB 58477    | A2 |
| SRXN1 140809   | A2 |
| SSBP1 6742     | A2 |
| SSBP2 23635    | A2 |
| SSNA1 8636     | A2 |
| SSR2 6746      | A2 |
| SSR4 6748      | A2 |
| SSX2IP 117178  | A2 |
| ST13 6767      | A2 |
| ST14 6768      | A2 |
| ST20 400410    | A2 |
| ST3GAL3 6487   | A2 |
| ST5 6764       | A2 |
| ST6GAL2 84620  | A2 |
| ST8SIA2 8128   | A2 |
| STAB1 23166    | A2 |
| STAC2 342667   | A2 |
| STAG3L3 442578 | A2 |
| STAMBP 10617   | A2 |
| STAM 8027      | A2 |
| STARD10 10809  | A2 |
| STARD13 90627  | A2 |
| STAT1 6772     | A2 |
| STAT6 6778     | A2 |
| STBD1 8987     | A2 |
| STIL 6491      | A2 |
| STIM1 6786     | A2 |
| STIP1 10963    | A2 |
| STK11IP 114790 | A2 |

|                |    |
|----------------|----|
| STMN1 3925     | A2 |
| STON1 11037    | A2 |
| STRA13 201254  | A2 |
| STRBP 55342    | A2 |
| STT3A 3703     | A2 |
| STX12 23673    | A2 |
| STX1A 6804     | A2 |
| STX3 6809      | A2 |
| STXBP1 6812    | A2 |
| STXBP2 6813    | A2 |
| STXBP6 29091   | A2 |
| STYXL1 51657   | A2 |
| SUCLA2 8803    | A2 |
| SUCLG1 8802    | A2 |
| SUGT1L1 283507 | A2 |
| SUGT1P1 441394 | A2 |
| SULF1 23213    | A2 |
| SULF2 55959    | A2 |
| SUMO1P3 474338 | A2 |
| SUMO1 7341     | A2 |
| SUMO2 6613     | A2 |
| SUMO3 6612     | A2 |
| SUN2 25777     | A2 |
| SUPT16H 11198  | A2 |
| SUPT3H 8464    | A2 |
| SUSD3 203328   | A2 |
| SUV39H1 6839   | A2 |
| SUV39H2 79723  | A2 |
| SUV420H2 84787 | A2 |
| SV2B 9899      | A2 |
| SVEP1 79987    | A2 |
| SWAP70 23075   | A2 |
| SYAP1 94056    | A2 |
| SYCE2 256126   | A2 |
| SYDE1 85360    | A2 |
| SYF2 25949     | A2 |
| SYN2 6854      | A2 |
| SYNE1 23345    | A2 |
| SYNGR2 9144    | A2 |
| SYNGR3 9143    | A2 |
| SYNGR4 23546   | A2 |
| SYNPO 11346    | A2 |
| SYT15 83849    | A2 |
| SYT2 127833    | A2 |
| TAC1 6863      | A2 |
| TACC3 10460    | A2 |
| TACO1 51204    | A2 |
| TACR1 6869     | A2 |
| TAF11 6882     | A2 |
| TAF12 6883     | A2 |
| TAF4 6874      | A2 |

|                 |    |
|-----------------|----|
| TAF5L 27097     | A2 |
| TAF6 6878       | A2 |
| TAF8 129685     | A2 |
| TAGLN2 8407     | A2 |
| TAL1 6886       | A2 |
| TANC2 26115     | A2 |
| TANK 10010      | A2 |
| TAP1 6890       | A2 |
| TAPBP 6892      | A2 |
| TARBP2 6895     | A2 |
| TARDBP 23435    | A2 |
| TARS2 80222     | A2 |
| TARS 6897       | A2 |
| TAS2R5 54429    | A2 |
| TAX1BP1 8887    | A2 |
| TBC1D10B 26000  | A2 |
| TBC1D15 64786   | A2 |
| TBC1D17 79735   | A2 |
| TBC1D25 4943    | A2 |
| TBC1D5 9779     | A2 |
| TBC1D9 23158    | A2 |
| TBCA 6902       | A2 |
| TBCB 1155       | A2 |
| TBCE 6905       | A2 |
| TBKBP1 9755     | A2 |
| TBL1XR1 79718   | A2 |
| TBL3 10607      | A2 |
| TBRG4 9238      | A2 |
| TBX15 6913      | A2 |
| TBX18 9096      | A2 |
| TCEA1 6917      | A2 |
| TCEAL2 140597   | A2 |
| TCEAL5 340543   | A2 |
| TCEB1 6921      | A2 |
| TCEB2 6923      | A2 |
| TCF15 6939      | A2 |
| TCF19 6941      | A2 |
| TCF21 6943      | A2 |
| TCF25 22980     | A2 |
| TCF3 6929       | A2 |
| TCF4 6925       | A2 |
| TCF7L1 83439    | A2 |
| TCF7L2 6934     | A2 |
| TCF7 6932       | A2 |
| TCTEX1D2 255758 | A2 |
| TDP1 55775      | A2 |
| TDRKH 11022     | A2 |
| TEAD4 7004      | A2 |
| TECPR2 9895     | A2 |
| TENC1 23371     | A2 |
| TEPP 374739     | A2 |

|                |    |
|----------------|----|
| TFAP2A 7020    | A2 |
| TFDP1 7027     | A2 |
| TFG 10342      | A2 |
| TFPI 7035      | A2 |
| TFPT 29844     | A2 |
| TFR2 7036      | A2 |
| TFRC 7037      | A2 |
| TF 7018        | A2 |
| TGFB1I1 7041   | A2 |
| TGFB3 7043     | A2 |
| TGFBR2 7048    | A2 |
| TGIF1 7050     | A2 |
| THBD 7056      | A2 |
| THOC3 84321    | A2 |
| THOC4 10189    | A2 |
| THOC6 79228    | A2 |
| THRA 7067      | A2 |
| THRSP 7069     | A2 |
| THSD1P1 374500 | A2 |
| THSD7A 221981  | A2 |
| THUMPD3 25917  | A2 |
| THY1 7070      | A2 |
| TIGD3 220359   | A2 |
| TIGD5 84948    | A2 |
| TIGIT 201633   | A2 |
| TIMELESS 8914  | A2 |
| TIMM16 51025   | A2 |
| TIMM17B 10245  | A2 |
| TIMM8A 1678    | A2 |
| TIMP1 7076     | A2 |
| TIMP4 7079     | A2 |
| TIPARP 25976   | A2 |
| TIPIN 54962    | A2 |
| TIPRL 261726   | A2 |
| TJP1 7082      | A2 |
| TJP2 9414      | A2 |
| TJP3 27134     | A2 |
| TK1 7083       | A2 |
| TK2 7084       | A2 |
| TKTL1 8277     | A2 |
| TLE2 7089      | A2 |
| TLE3 7090      | A2 |
| TLE6 79816     | A2 |
| TLL2 7093      | A2 |
| TLN2 83660     | A2 |
| TLR3 7098      | A2 |
| TLR4 7099      | A2 |
| TM4SF18 116441 | A2 |
| TM6SF2 53345   | A2 |
| TM9SF1 10548   | A2 |
| TM9SF2 9375    | A2 |

|                    |    |
|--------------------|----|
| TM9SF4 9777        | A2 |
| TMBIM6 7009        | A2 |
| TMC4 147798        | A2 |
| TMC6 11322         | A2 |
| TMCC3 57458        | A2 |
| TMCO1 54499        | A2 |
| TMCO3 55002        | A2 |
| TMCO4 255104       | A2 |
| TMCO6 55374        | A2 |
| TMCO7 79613        | A2 |
| TMED10P1 286102    | A2 |
| TMED2 10959        | A2 |
| TMED3 23423        | A2 |
| TMED4 222068       | A2 |
| TMED7 51014        | A2 |
| TMED9 54732        | A2 |
| TMEM100 55273      | A2 |
| TMEM104 54868      | A2 |
| TMEM106C 79022     | A2 |
| TMEM109 79073      | A2 |
| TMEM117 84216      | A2 |
| TMEM120B 144404    | A2 |
| TMEM127 55654      | A2 |
| TMEM132A 54972     | A2 |
| TMEM133 83935      | A2 |
| TMEM134 80194      | A2 |
| TMEM141 85014      | A2 |
| TMEM147 10430      | A2 |
| TMEM14A 28978      | A2 |
| TMEM165 55858      | A2 |
| TMEM170A 124491    | A2 |
| TMEM170B 100113407 | A2 |
| TMEM178 130733     | A2 |
| TMEM179B 374395    | A2 |
| TMEM183A 92703     | A2 |
| TMEM18 129787      | A2 |
| TMEM191A 84222     | A2 |
| TMEM194A 23306     | A2 |
| TMEM195 392636     | A2 |
| TMEM199 147007     | A2 |
| TMEM200B 399474    | A2 |
| TMEM205 374882     | A2 |
| TMEM206 55248      | A2 |
| TMEM208 29100      | A2 |
| TMEM209 84928      | A2 |
| TMEM218 219854     | A2 |
| TMEM223 79064      | A2 |
| TMEM33 55161       | A2 |
| TMEM41A 90407      | A2 |
| TMEM42 131616      | A2 |
| TMEM43 79188       | A2 |

|                  |    |
|------------------|----|
| TMEM47 83604     | A2 |
| TMEM54 113452    | A2 |
| TMEM55A 55529    | A2 |
| TMEM57 55219     | A2 |
| TMEM69 51249     | A2 |
| TMEM71 137835    | A2 |
| TMEM80 283232    | A2 |
| TMEM87B 84910    | A2 |
| TMEM88 92162     | A2 |
| TMEM90B 79953    | A2 |
| TMEM9B 56674     | A2 |
| TMEM9 252839     | A2 |
| TMIE 259236      | A2 |
| TMLHE 55217      | A2 |
| TMSB10 9168      | A2 |
| TMTC3 160418     | A2 |
| TMTC4 84899      | A2 |
| TMX1 81542       | A2 |
| TNFAIP8L1 126282 | A2 |
| TNFRSF10D 8793   | A2 |
| TNFRSF18 8784    | A2 |
| TNFRSF1B 7133    | A2 |
| TNFRSF21 27242   | A2 |
| TNFRSF4 7293     | A2 |
| TNFRSF8 943      | A2 |
| TNFSF12 8742     | A2 |
| TNFSF4 7292      | A2 |
| TNRC6B 23112     | A2 |
| TNXB 7148        | A2 |
| TOM1L2 146691    | A2 |
| TOMM40L 84134    | A2 |
| TOMM40 10452     | A2 |
| TOMM6 100188893  | A2 |
| TOMM7 54543      | A2 |
| TOP1P2 7152      | A2 |
| TOP1 7150        | A2 |
| TOPBP1 11073     | A2 |
| TOR1A 1861       | A2 |
| TOR1B 27348      | A2 |
| TOR2A 27433      | A2 |
| TOR3A 64222      | A2 |
| TOX3 27324       | A2 |
| TP53AIP1 63970   | A2 |
| TP53BP2 7159     | A2 |
| TP53I1 9537      | A2 |
| TP53INP1 94241   | A2 |
| TP53RK 112858    | A2 |
| TP53TG3B 729355  | A2 |
| TP63 8626        | A2 |
| TPD52 7163       | A2 |
| TPI1P2 286016    | A2 |

|               |    |
|---------------|----|
| TPI1 7167     | A2 |
| TPM4 7171     | A2 |
| TPMT 7172     | A2 |
| TPPP2 122664  | A2 |
| TPRKB 51002   | A2 |
| TPRN 286262   | A2 |
| TPT1 7178     | A2 |
| TPX2 22974    | A2 |
| TRAF2 7186    | A2 |
| TRAF5 7188    | A2 |
| TRAF6 7189    | A2 |
| TRAF7 84231   | A2 |
| TRAI 10293    | A2 |
| TRAPPC9 83696 | A2 |
| TRDMT1 1787   | A2 |
| TREH 11181    | A2 |
| TREM1 54210   | A2 |
| TRHDE 29953   | A2 |
| TRIB3 57761   | A2 |
| TRIM23 373    | A2 |
| TRIM24 8805   | A2 |
| TRIM26 7726   | A2 |
| TRIM27 5987   | A2 |
| TRIM28 10155  | A2 |
| TRIM29 23650  | A2 |
| TRIM2 23321   | A2 |
| TRIM35 23087  | A2 |
| TRIM46 80128  | A2 |
| TRIM50 135892 | A2 |
| TRIM56 81844  | A2 |
| TRIM61 391712 | A2 |
| TRMT11 60487  | A2 |
| TRMT12 55039  | A2 |
| TRMT5 57570   | A2 |
| TRMT6 51605   | A2 |
| TRNP1 388610  | A2 |
| TROAP 10024   | A2 |
| TROVE2 6738   | A2 |
| TRO 7216      | A2 |
| TRPM2 7226    | A2 |
| TRPM3 80036   | A2 |
| TRPM6 140803  | A2 |
| TRUB1 142940  | A2 |
| TSC22D1 8848  | A2 |
| TSC22D3 1831  | A2 |
| TSEN15 116461 | A2 |
| TSEN34 79042  | A2 |
| TSEFM 10102   | A2 |
| TSG101 7251   | A2 |
| TSHZ1 10194   | A2 |
| TSKS 60385    | A2 |



|                 |    |
|-----------------|----|
| TSNAX 7257      | A2 |
| TSPAN11 441631  | A2 |
| TSPAN13 27075   | A2 |
| TSPAN14 81619   | A2 |
| TSPAN15 23555   | A2 |
| TSPAN17 26262   | A2 |
| TSPAN1 10103    | A2 |
| TSPAN3 10099    | A2 |
| TSPAN6 7105     | A2 |
| TSPAN7 7102     | A2 |
| TSSC1 7260      | A2 |
| TSSK4 283629    | A2 |
| TSTD1 100131187 | A2 |
| TTBK2 146057    | A2 |
| TTC13 79573     | A2 |
| TTC33 23548     | A2 |
| TTC38 55020     | A2 |
| TTC39A 22996    | A2 |
| TTC9B 148014    | A2 |
| TTC9C 283237    | A2 |
| TTC9 23508      | A2 |
| TTK 7272        | A2 |
| TLL10 254173    | A2 |
| TLL12 23170     | A2 |
| TTYH3 80727     | A2 |
| TUBA1B 10376    | A2 |
| TUBB2C 10383    | A2 |
| TUBB3 10381     | A2 |
| TUBB8 347688    | A2 |
| TUBB 203068     | A2 |
| TUBG1 7283      | A2 |
| TUBGCP6 85378   | A2 |
| TUFM 7284       | A2 |
| TUFT1 7286      | A2 |
| TULP2 7288      | A2 |
| TULP4 56995     | A2 |
| TWF1 5756       | A2 |
| TWIST1 7291     | A2 |
| TWSG1 57045     | A2 |
| TXNDC11 51061   | A2 |
| TXNDC12 51060   | A2 |
| TXNDC17 84817   | A2 |
| TXNDC2 84203    | A2 |
| TXNDC6 347736   | A2 |
| TXNDC9 10190    | A2 |
| TXNIP 10628     | A2 |
| TXNL1 9352      | A2 |
| TXNL4A 10907    | A2 |
| TXN 7295        | A2 |
| TYMP 1890       | A2 |
| TYMS 7298       | A2 |

|                 |    |
|-----------------|----|
| TYW3 127253     | A2 |
| U2AF2 11338     | A2 |
| UACA 55075      | A2 |
| UBA1 7317       | A2 |
| UBAP1 51271     | A2 |
| UBAP2L 9898     | A2 |
| UBE2A 7319      | A2 |
| UBE2C 11065     | A2 |
| UBE2D2 7322     | A2 |
| UBE2E1 7324     | A2 |
| UBE2E3 10477    | A2 |
| UBE2F 140739    | A2 |
| UBE2H 7328      | A2 |
| UBE2I 7329      | A2 |
| UBE2L6 9246     | A2 |
| UBE2MP1 606551  | A2 |
| UBE2N 7334      | A2 |
| UBE2O 63893     | A2 |
| UBE2Q1 55585    | A2 |
| UBE2Q2P1 388165 | A2 |
| UBE2S 27338     | A2 |
| UBE2T 29089     | A2 |
| UBE2V2 7336     | A2 |
| UBE2W 55284     | A2 |
| UBFD1 56061     | A2 |
| UBL4A 8266      | A2 |
| UBL5 59286      | A2 |
| UBN1 29855      | A2 |
| UBQLN4 56893    | A2 |
| UBR7 55148      | A2 |
| UBTD2 92181     | A2 |
| UBXN4 23190     | A2 |
| UCHL5 51377     | A2 |
| UCK2 7371       | A2 |
| UFC1 51506      | A2 |
| UFD1L 7353      | A2 |
| UFSP2 55325     | A2 |
| UGGT1 56886     | A2 |
| UHRF1 29128     | A2 |
| UIMC1 51720     | A2 |
| UNC119B 84747   | A2 |
| UNC5B 219699    | A2 |
| UNC93B1 81622   | A2 |
| UNKL 64718      | A2 |
| UPRT 139596     | A2 |
| UQCRQ 27089     | A2 |
| USF1 7391       | A2 |
| USHBP1 83878    | A2 |
| USP11 8237      | A2 |
| USP14 9097      | A2 |
| USP18 11274     | A2 |

|                 |    |
|-----------------|----|
| USP19 10869     | A2 |
| USP21 27005     | A2 |
| USP25 29761     | A2 |
| USP30 84749     | A2 |
| USP31 57478     | A2 |
| USP39 10713     | A2 |
| USP53 54532     | A2 |
| USP5 8078       | A2 |
| USP7 7874       | A2 |
| UST 10090       | A2 |
| UTS2D 257313    | A2 |
| UXS1 80146      | A2 |
| VAMP3 9341      | A2 |
| VANGL1 81839    | A2 |
| VARS2 57176     | A2 |
| VARS 7407       | A2 |
| VASP 7408       | A2 |
| VAV2 7410       | A2 |
| VBP1 7411       | A2 |
| VCP 7415        | A2 |
| VDAC1 7416      | A2 |
| VENTX 27287     | A2 |
| VEZT 55591      | A2 |
| VILL 50853      | A2 |
| VIPR1 7433      | A2 |
| VIP 7432        | A2 |
| VIT 5212        | A2 |
| VKORC1L1 154807 | A2 |
| VKORC1 79001    | A2 |
| VLDLR 7436      | A2 |
| VOPP1 81552     | A2 |
| VPS11 55823     | A2 |
| VPS13A 23230    | A2 |
| VPS24 51652     | A2 |
| VPS28 51160     | A2 |
| VPS33A 65082    | A2 |
| VPS36 51028     | A2 |
| VPS37C 55048    | A2 |
| VPS39 23339     | A2 |
| VPS45 11311     | A2 |
| VPS52 6293      | A2 |
| VRK1 7443       | A2 |
| VSNL1 7447      | A2 |
| VWA1 64856      | A2 |
| VWA5A 4013      | A2 |
| VWCE 220001     | A2 |
| WBP1 23559      | A2 |
| WBP2NL 164684   | A2 |
| WBSCR22 114049  | A2 |
| WBSCR28 135886  | A2 |
| WDFY2 115825    | A2 |

|                |    |
|----------------|----|
| WDHD1 11169    | A2 |
| WDR11 55717    | A2 |
| WDR19 57728    | A2 |
| WDR1 9948      | A2 |
| WDR24 84219    | A2 |
| WDR26 80232    | A2 |
| WDR27 253769   | A2 |
| WDR37 22884    | A2 |
| WDR48 57599    | A2 |
| WDR54 84058    | A2 |
| WDR59 79726    | A2 |
| WDR67 93594    | A2 |
| WDR75 84128    | A2 |
| WDR81 124997   | A2 |
| WDR90 197335   | A2 |
| WDYHV1 55093   | A2 |
| WHAMML1 339005 | A2 |
| WHAMM 123720   | A2 |
| WHSC1 7468     | A2 |
| WIBG 84305     | A2 |
| WISP1 8840     | A2 |
| WLS 79971      | A2 |
| WNK2 65268     | A2 |
| WNT2 7472      | A2 |
| WNT7B 7477     | A2 |
| WRNIP1 56897   | A2 |
| WSCD1 23302    | A2 |
| WTAP 9589      | A2 |
| XIST 7503      | A2 |
| XPA 7507       | A2 |
| XPC 7508       | A2 |
| XPNPEP2 7512   | A2 |
| XPO1 7514      | A2 |
| XPO5 57510     | A2 |
| XPO6 23214     | A2 |
| XPOT 11260     | A2 |
| XRCC2 7516     | A2 |
| XRCC4 7518     | A2 |
| YARS2 51067    | A2 |
| YDJC 150223    | A2 |
| YEATS4 8089    | A2 |
| YIF1A 10897    | A2 |
| YIPF1 54432    | A2 |
| YIPF2 78992    | A2 |
| YIPF3 25844    | A2 |
| YKT6 10652     | A2 |
| YLPM1 56252    | A2 |
| YME1L1 10730   | A2 |
| YPEL4 219539   | A2 |
| YWHAB 7529     | A2 |
| YWHAH 7533     | A2 |

|                  |    |
|------------------|----|
| YWHAZ 7534       | A2 |
| YY1AP1 55249     | A2 |
| YY1 7528         | A2 |
| YY2 404281       | A2 |
| ZAK 51776        | A2 |
| ZBED3 84327      | A2 |
| ZBED4 9889       | A2 |
| ZBTB12 221527    | A2 |
| ZBTB16 7704      | A2 |
| ZBTB1 22890      | A2 |
| ZBTB20 26137     | A2 |
| ZBTB34 403341    | A2 |
| ZBTB40 9923      | A2 |
| ZBTB41 360023    | A2 |
| ZBTB42 100128927 | A2 |
| ZBTB44 29068     | A2 |
| ZBTB47 92999     | A2 |
| ZBTB7B 51043     | A2 |
| ZBTB8OS 339487   | A2 |
| ZC3H12B 340554   | A2 |
| ZC3H12C 85463    | A2 |
| ZC3H13 23091     | A2 |
| ZC3H3 23144      | A2 |
| ZC3H6 376940     | A2 |
| ZC3H7B 23264     | A2 |
| ZCCHC10 54819    | A2 |
| ZCCHC11 23318    | A2 |
| ZCCHC12 170261   | A2 |
| ZCCHC4 29063     | A2 |
| ZCWPW1 55063     | A2 |
| ZCWPW2 152098    | A2 |
| ZDHHC12 84885    | A2 |
| ZDHHC15 158866   | A2 |
| ZDHHC16 84287    | A2 |
| ZDHHC1 29800     | A2 |
| ZDHHC24 254359   | A2 |
| ZDHHC2 51201     | A2 |
| ZDHHC6 64429     | A2 |
| ZDHHC9 51114     | A2 |
| ZER1 10444       | A2 |
| ZFAND5 7763      | A2 |
| ZFHX4 79776      | A2 |
| ZFP161 7541      | A2 |
| ZFP28 140612     | A2 |
| ZFP2 80108       | A2 |
| ZFP36 7538       | A2 |
| ZFP37 7539       | A2 |
| ZFP62 643836     | A2 |
| ZFP64 55734      | A2 |
| ZFP90 146198     | A2 |
| ZFPM1 161882     | A2 |

|                |    |
|----------------|----|
| ZFYVE1 53349   | A2 |
| ZFYVE20 64145  | A2 |
| ZFYVE9 9372    | A2 |
| ZG16B 124220   | A2 |
| ZHX3 23051     | A2 |
| ZIC2 7546      | A2 |
| ZMAT1 84460    | A2 |
| ZMPSTE24 10269 | A2 |
| ZMYND10 51364  | A2 |
| ZMYND19 116225 | A2 |
| ZMYND8 23613   | A2 |
| ZNF10 7556     | A2 |
| ZNF124 7678    | A2 |
| ZNF133 7692    | A2 |
| ZNF138 7697    | A2 |
| ZNF146 7705    | A2 |
| ZNF154 7710    | A2 |
| ZNF157 7712    | A2 |
| ZNF160 90338   | A2 |
| ZNF167 55888   | A2 |
| ZNF174 7727    | A2 |
| ZNF184 7738    | A2 |
| ZNF187 7741    | A2 |
| ZNF200 7752    | A2 |
| ZNF202 7753    | A2 |
| ZNF207 7756    | A2 |
| ZNF213 7760    | A2 |
| ZNF219 51222   | A2 |
| ZNF22 7570     | A2 |
| ZNF239 8187    | A2 |
| ZNF23 7571     | A2 |
| ZNF248 57209   | A2 |
| ZNF25 219749   | A2 |
| ZNF260 339324  | A2 |
| ZNF267 10308   | A2 |
| ZNF273 10793   | A2 |
| ZNF276 92822   | A2 |
| ZNF281 23528   | A2 |
| ZNF28 7576     | A2 |
| ZNF296 162979  | A2 |
| ZNF319 57567   | A2 |
| ZNF330 27309   | A2 |
| ZNF331 55422   | A2 |
| ZNF333 84449   | A2 |
| ZNF334 55713   | A2 |
| ZNF337 26152   | A2 |
| ZNF341 84905   | A2 |
| ZNF345 25850   | A2 |
| ZNF354B 117608 | A2 |
| ZNF354C 30832  | A2 |
| ZNF366 167465  | A2 |

|                    |    |
|--------------------|----|
| ZNF367 195828      | A2 |
| ZNF37B 100129482   | A2 |
| ZNF383 163087      | A2 |
| ZNF389 651302      | A2 |
| ZNF397OS 100101467 | A2 |
| ZNF397 84307       | A2 |
| ZNF407 55628       | A2 |
| ZNF410 57862       | A2 |
| ZNF434 54925       | A2 |
| ZNF438 220929      | A2 |
| ZNF43 7594         | A2 |
| ZNF443 10224       | A2 |
| ZNF444 55311       | A2 |
| ZNF449 203523      | A2 |
| ZNF454 285676      | A2 |
| ZNF462 58499       | A2 |
| ZNF467 168544      | A2 |
| ZNF468 90333       | A2 |
| ZNF469 84627       | A2 |
| ZNF470 388566      | A2 |
| ZNF471 57573       | A2 |
| ZNF480 147657      | A2 |
| ZNF483 158399      | A2 |
| ZNF488 118738      | A2 |
| ZNF490 57474       | A2 |
| ZNF498 221785      | A2 |
| ZNF501 115560      | A2 |
| ZNF507 22847       | A2 |
| ZNF521 25925       | A2 |
| ZNF525 170958      | A2 |
| ZNF527 84503       | A2 |
| ZNF540 163255      | A2 |
| ZNF544 27300       | A2 |
| ZNF546 339327      | A2 |
| ZNF552 79818       | A2 |
| ZNF554 115196      | A2 |
| ZNF559 84527       | A2 |
| ZNF561 93134       | A2 |
| ZNF587 84914       | A2 |
| ZNF592 9640        | A2 |
| ZNF596 169270      | A2 |
| ZNF598 90850       | A2 |
| ZNF608 57507       | A2 |
| ZNF642 339559      | A2 |
| ZNF643 65243       | A2 |
| ZNF646 9726        | A2 |
| ZNF655 79027       | A2 |
| ZNF658 26149       | A2 |
| ZNF662 389114      | A2 |
| ZNF667 63934       | A2 |
| ZNF668 79759       | A2 |

|                |    |
|----------------|----|
| ZNF672 79894   | A2 |
| ZNF673 55634   | A2 |
| ZNF675 171392  | A2 |
| ZNF677 342926  | A2 |
| ZNF678 339500  | A2 |
| ZNF681 148213  | A2 |
| ZNF682 91120   | A2 |
| ZNF687 57592   | A2 |
| ZNF695 57116   | A2 |
| ZNF699 374879  | A2 |
| ZNF704 619279  | A2 |
| ZNF727 442319  | A2 |
| ZNF767 79970   | A2 |
| ZNF768 79724   | A2 |
| ZNF771 51333   | A2 |
| ZNF778 197320  | A2 |
| ZNF843 283933  | A2 |
| ZNF853 54753   | A2 |
| ZNF85 7639     | A2 |
| ZNHIT2 741     | A2 |
| ZNRF2 223082   | A2 |
| ZRANB1 54764   | A2 |
| ZRANB2 9406    | A2 |
| ZSCAN12 9753   | A2 |
| ZSCAN23 222696 | A2 |
| ZSWIM7 125150  | A2 |
| ZWILCH 55055   | A2 |
| ZWINT 11130    | A2 |
| ZYG11A 440590  | A2 |
| ZZEF1 23140    | A2 |
| AAGAB 79719    | A3 |
| ABCC6P1 653190 | A3 |
| ABCC9 10060    | A3 |
| ABHD11 83451   | A3 |
| ABI3BP 25890   | A3 |
| ACAA2 10449    | A3 |
| ACADL 33       | A3 |
| ACO1 48        | A3 |
| ACSL4 2182     | A3 |
| ACVRL1 94      | A3 |
| ADAMTSL4 54507 | A3 |
| ADCY3 109      | A3 |
| ADM2 79924     | A3 |
| ADM 133        | A3 |
| ADNP 23394     | A3 |
| ADPRH 141      | A3 |
| AFAP1L1 134265 | A3 |
| AFTPH 54812    | A3 |
| AGPAT4 56895   | A3 |
| AIFM2 84883    | A3 |
| AKAP12 9590    | A3 |



|                 |    |
|-----------------|----|
| AKIRIN2 55122   | A3 |
| AMACR 23600     | A3 |
| ANAPC7 51434    | A3 |
| ANGPT1 284      | A3 |
| ANGPT4 51378    | A3 |
| ANGPTL2 23452   | A3 |
| ANGPTL4 51129   | A3 |
| ANKRD32 84250   | A3 |
| ANO4 121601     | A3 |
| ANO6 196527     | A3 |
| ANTXR2 118429   | A3 |
| ANXA9 8416      | A3 |
| AOC2 314        | A3 |
| AOC3 8639       | A3 |
| AOX1 316        | A3 |
| AP1AR 55435     | A3 |
| APBB1IP 54518   | A3 |
| APOL3 80833     | A3 |
| APOLD1 81575    | A3 |
| AQP7 364        | A3 |
| ARF6 382        | A3 |
| ARFGEF1 10565   | A3 |
| ARHGAP11B 89839 | A3 |
| ARHGAP17 55114  | A3 |
| ARHGAP31 57514  | A3 |
| ARHGEF15 22899  | A3 |
| ARHGEF16 27237  | A3 |
| ARID1A 8289     | A3 |
| ARMC9 80210     | A3 |
| ARRDC1 92714    | A3 |
| ASAM 79827      | A3 |
| ASPA 443        | A3 |
| ASPHD2 57168    | A3 |
| ATAD5 79915     | A3 |
| ATF6 22926      | A3 |
| ATN1 1822       | A3 |
| ATP6V1A 523     | A3 |
| ATP6V1G1 9550   | A3 |
| ATP8B4 79895    | A3 |
| ATXN2L 11273    | A3 |
| AVL9 23080      | A3 |
| B4GALNT4 338707 | A3 |
| BACE1 23621     | A3 |
| BARD1 580       | A3 |
| BAT2L2 23215    | A3 |
| BAZ1A 11177     | A3 |
| BEST1 7439      | A3 |
| BHMT2 23743     | A3 |
| BIN3 55909      | A3 |
| BMP2 650        | A3 |
| BMP5 653        | A3 |

|                 |    |
|-----------------|----|
| BMP6 654        | A3 |
| BMPR1A 657      | A3 |
| BRCA2 675       | A3 |
| BRIP1 83990     | A3 |
| BSPRY 54836     | A3 |
| BST1 683        | A3 |
| BTBD12 84464    | A3 |
| BYSL 705        | A3 |
| BZW1 9689       | A3 |
| C10orf25 220979 | A3 |
| C10orf72 196740 | A3 |
| C10orf90 118611 | A3 |
| C12orf59 120939 | A3 |
| C12orf66 144577 | A3 |
| C13orf33 84935  | A3 |
| C14orf139 79686 | A3 |
| C14orf49 161176 | A3 |
| C16orf93 90835  | A3 |
| C19orf12 83636  | A3 |
| C19orf76 199800 | A3 |
| C1QTNF1 114897  | A3 |
| C1QTNF7 114905  | A3 |
| C1R 715         | A3 |
| C1orf123 54987  | A3 |
| C1orf74 148304  | A3 |
| C20orf94 128710 | A3 |
| C21orf58 54058  | A3 |
| C2CD2 25966     | A3 |
| C2CD4C 126567   | A3 |
| C2orf15 150590  | A3 |
| C2orf84 653140  | A3 |
| C3orf55 152078  | A3 |
| C3 718          | A3 |
| C4orf52 389203  | A3 |
| C5orf32 84418   | A3 |
| C5orf34 375444  | A3 |
| C6orf201 404220 | A3 |
| C6orf72 116254  | A3 |
| C7orf31 136895  | A3 |
| C7orf41 222166  | A3 |
| C7orf43 55262   | A3 |
| C7 730          | A3 |
| C9orf91 203197  | A3 |
| CA12 771        | A3 |
| CALB2 794       | A3 |
| CALD1 800       | A3 |
| CAMK1 8536      | A3 |
| CANX 821        | A3 |
| CAPN13 92291    | A3 |
| CAPN5 726       | A3 |
| CASKIN2 57513   | A3 |

|                |    |
|----------------|----|
| CAT 847        | A3 |
| CCDC107 203260 | A3 |
| CCDC17 149483  | A3 |
| CCDC36 339834  | A3 |
| CCDC3 83643    | A3 |
| CCDC69 26112   | A3 |
| CCDC80 151887  | A3 |
| CCDC85A 114800 | A3 |
| CCL21 6366     | A3 |
| CCL23 6368     | A3 |
| CCND3 896      | A3 |
| CCRL1 51554    | A3 |
| CCT2 10576     | A3 |
| CD248 57124    | A3 |
| CD2AP 23607    | A3 |
| CD36 948       | A3 |
| CD81 975       | A3 |
| CD93 22918     | A3 |
| CD99L2 83692   | A3 |
| CDC42EP2 10435 | A3 |
| CDC6 990       | A3 |
| CDCP1 64866    | A3 |
| CDH13 1012     | A3 |
| CDH5 1003      | A3 |
| CDO1 1036      | A3 |
| CDS1 1040      | A3 |
| CEBPA 1050     | A3 |
| CEP70 80321    | A3 |
| CES1 1066      | A3 |
| CFH 3075       | A3 |
| CHML 1122      | A3 |
| CHRDL1 91851   | A3 |
| CHTF18 63922   | A3 |
| CHURC1 91612   | A3 |
| CIDEC 63924    | A3 |
| CISH 1154      | A3 |
| CLCNKB 1188    | A3 |
| CLDND2 125875  | A3 |
| CLEC14A 161198 | A3 |
| CLEC3B 7123    | A3 |
| CLEC4G 339390  | A3 |
| CLIC2 1193     | A3 |
| CLN3 1201      | A3 |
| CMTM7 112616   | A3 |
| CNDP2 55748    | A3 |
| CNKS2 22866    | A3 |
| CNOT10 25904   | A3 |
| CNOT6 57472    | A3 |
| CNRIP1 25927   | A3 |
| CNTFR 1271     | A3 |
| COMMD6 170622  | A3 |

|               |    |
|---------------|----|
| CPNE2 221184  | A3 |
| CPSF6 11052   | A3 |
| CRHR2 1395    | A3 |
| CRNKL1 51340  | A3 |
| CRTAP 10491   | A3 |
| CSNK2A2 1459  | A3 |
| CSRP2 1466    | A3 |
| CSTF1 1477    | A3 |
| CSTF3 1479    | A3 |
| CTDSP1 58190  | A3 |
| CXCR7 57007   | A3 |
| CYB5R3 1727   | A3 |
| CYGB 114757   | A3 |
| CYP26B1 56603 | A3 |
| CYP4F12 66002 | A3 |
| CYTL1 54360   | A3 |
| DAAM2 23500   | A3 |
| DAB2 1601     | A3 |
| DBR1 51163    | A3 |
| DCAF7 10238   | A3 |
| DCHS1 8642    | A3 |
| DCLRE1A 9937  | A3 |
| DCN 1634      | A3 |
| DEF8 54849    | A3 |
| DENND2D 79961 | A3 |
| DENR 8562     | A3 |
| DFNA5 1687    | A3 |
| DGAT2 84649   | A3 |
| DHDDS 79947   | A3 |
| DHRS13 147015 | A3 |
| DHRS3 9249    | A3 |
| DHX34 9704    | A3 |
| DHX9 1660     | A3 |
| DIAPH3 81624  | A3 |
| DLC1 10395    | A3 |
| DLEU2 8847    | A3 |
| DMGDH 29958   | A3 |
| DMRT3 58524   | A3 |
| DNHD1 144132  | A3 |
| DOC2B 8447    | A3 |
| DOCK6 57572   | A3 |
| DPT 1805      | A3 |
| DRP2 1821     | A3 |
| DSEL 92126    | A3 |
| DTX1 1840     | A3 |
| DUS4L 11062   | A3 |
| DUSP22 56940  | A3 |
| EARS2 124454  | A3 |
| EBF1 1879     | A3 |
| EBF2 64641    | A3 |
| EBF3 253738   | A3 |

|                 |    |
|-----------------|----|
| ECE1 1889       | A3 |
| ECM2 1842       | A3 |
| ECSCR 641700    | A3 |
| EHBP1 23301     | A3 |
| EHD2 30846      | A3 |
| EID3 493861     | A3 |
| EIF3F 8665      | A3 |
| EIF4E3 317649   | A3 |
| EIF4EBP2 1979   | A3 |
| ELTD1 64123     | A3 |
| EMX2OS 196047   | A3 |
| EMX2 2018       | A3 |
| EPB42 2038      | A3 |
| EPDR1 54749     | A3 |
| EPHA10 284656   | A3 |
| EPT1 85465      | A3 |
| ERBB3 2065      | A3 |
| ERVFRDE1 405754 | A3 |
| ESAM 90952      | A3 |
| ETS1 2113       | A3 |
| EXTL3 2137      | A3 |
| FAAH2 158584    | A3 |
| FABP4 2167      | A3 |
| FADS3 3995      | A3 |
| FAM120A 23196   | A3 |
| FAM124B 79843   | A3 |
| FAM138F 641702  | A3 |
| FAM160B2 64760  | A3 |
| FAM180B 399888  | A3 |
| FAM184A 79632   | A3 |
| FAM199X 139231  | A3 |
| FAM83H 286077   | A3 |
| FAM86A 196483   | A3 |
| FAM86C 55199    | A3 |
| FAM89A 375061   | A3 |
| FAM91A1 157769  | A3 |
| FANCB 2187      | A3 |
| FBLN2 2199      | A3 |
| FBLN7 129804    | A3 |
| FBXO22 26263    | A3 |
| FBXO46 23403    | A3 |
| FERMT2 10979    | A3 |
| FEZ1 9638       | A3 |
| FGD6 55785      | A3 |
| FGFR1OP 11116   | A3 |
| FHDC1 85462     | A3 |
| FILIP1L 11259   | A3 |
| FIP1L1 81608    | A3 |
| FLI1 2313       | A3 |
| FLT3LG 2323     | A3 |
| FMO3 2328       | A3 |

|                |    |
|----------------|----|
| FNDC4 64838    | A3 |
| FOXD2 2306     | A3 |
| FRMD1 79981    | A3 |
| FSTL1 11167    | A3 |
| FUBP1 8880     | A3 |
| FUS 2521       | A3 |
| FXVD6 53826    | A3 |
| FYN 2534       | A3 |
| FZD2 2535      | A3 |
| FZD4 8322      | A3 |
| G0S2 50486     | A3 |
| GABPB1 2553    | A3 |
| GALNT12 79695  | A3 |
| GALNTL2 117248 | A3 |
| GAS1 2619      | A3 |
| GAS6 2621      | A3 |
| GCOM1 145781   | A3 |
| GDPD5 81544    | A3 |
| GEM 2669       | A3 |
| GIMAP1 170575  | A3 |
| GIMAP7 168537  | A3 |
| GINS4 84296    | A3 |
| GJC2 57165     | A3 |
| GK3P 2713      | A3 |
| GLYAT 10249    | A3 |
| GMPPB 29925    | A3 |
| GNAI1 2770     | A3 |
| GNG2 54331     | A3 |
| GNL3L 54552    | A3 |
| GNRH1 2796     | A3 |
| GORAB 92344    | A3 |
| GPATCH2 55105  | A3 |
| GPBAR1 151306  | A3 |
| GPD1 2819      | A3 |
| GPR109A 338442 | A3 |
| GPR116 221395  | A3 |
| GPR125 166647  | A3 |
| GPR133 283383  | A3 |
| GPR34 2857     | A3 |
| GPX3 2878      | A3 |
| GRID1 2894     | A3 |
| GRK5 2869      | A3 |
| GSPT1 2935     | A3 |
| GSR 2936       | A3 |
| GSTCD 79807    | A3 |
| GTDC1 79712    | A3 |
| GYG2 8908      | A3 |
| HAT1 8520      | A3 |
| HCFC1 3054     | A3 |
| HCG27 253018   | A3 |
| HEPACAM 220296 | A3 |

|                 |    |
|-----------------|----|
| HEPN1 641654    | A3 |
| HIC1 3090       | A3 |
| HMGA1 3159      | A3 |
| HNRNPA3P1 10151 | A3 |
| HNRNPR 10236    | A3 |
| HOXD9 3235      | A3 |
| HPS3 84343      | A3 |
| HSD17B13 345275 | A3 |
| HSPA12A 259217  | A3 |
| HSPA14 51182    | A3 |
| HYAL1 3373      | A3 |
| ICA1 3382       | A3 |
| IFFO1 25900     | A3 |
| IGSF8 93185     | A3 |
| IGSF9 57549     | A3 |
| IL3RA 3563      | A3 |
| INMT 11185      | A3 |
| INPP5K 51763    | A3 |
| INTS10 55174    | A3 |
| IPO4 79711      | A3 |
| IQSEC3 440073   | A3 |
| ISCA1 81689     | A3 |
| ISCU 23479      | A3 |
| ITGA7 3679      | A3 |
| ITGB1BP1 9270   | A3 |
| ITM2B 9445      | A3 |
| ITSN1 6453      | A3 |
| JARID2 3720     | A3 |
| JAZF1 221895    | A3 |
| KANK2 25959     | A3 |
| KBTBD11 9920    | A3 |
| KCNA6 3742      | A3 |
| KCNB1 3745      | A3 |
| KCNIP1 30820    | A3 |
| KCNIP2 30819    | A3 |
| KCNJ8 3764      | A3 |
| KCNT2 343450    | A3 |
| KDR 3791        | A3 |
| KDSR 2531       | A3 |
| KIAA1543 57662  | A3 |
| KIF17 57576     | A3 |
| KIF20B 9585     | A3 |
| KLB 152831      | A3 |
| KLC1 3831       | A3 |
| KLF14 136259    | A3 |
| KLHDC9 126823   | A3 |
| KLHL4 56062     | A3 |
| KRT18 3875      | A3 |
| KRT19 3880      | A3 |
| LAMA2 3908      | A3 |
| LAMA4 3910      | A3 |

|                           |    |
|---------------------------|----|
| LAMB2 3913                | A3 |
| LAMC1 3915                | A3 |
| LATS2 26524               | A3 |
| LCLAT1 253558             | A3 |
| LCN6 158062               | A3 |
| LEO1 123169               | A3 |
| LEP 3952                  | A3 |
| LGALS3 3958               | A3 |
| LIG1 3978                 | A3 |
| LIG3 3980                 | A3 |
| LIMS3-LOC440895 100271835 | A3 |
| LIMS3 96626               | A3 |
| LIPE 3991                 | A3 |
| LMLN 89782                | A3 |
| LMX1A 4009                | A3 |
| LNx2 222484               | A3 |
| LOC100128788 100128788    | A3 |
| LOC158376 158376          | A3 |
| LOC283731 283731          | A3 |
| LOC284441 284441          | A3 |
| LOC339524 339524          | A3 |
| LOC401052 401052          | A3 |
| LOC642597 642597          | A3 |
| LOC80054 80054            | A3 |
| LOC90586 90586            | A3 |
| LPAR2 9170                | A3 |
| LPCAT4 254531             | A3 |
| LRCH2 57631               | A3 |
| LRP1 4035                 | A3 |
| LRP3 4037                 | A3 |
| LRRc16A 55604             | A3 |
| LRRc1 55227               | A3 |
| LRRc46 90506              | A3 |
| LRRc59 55379              | A3 |
| LRRN3 54674               | A3 |
| MAP1B 4131                | A3 |
| MAP1LC3B 81631            | A3 |
| MAP1LC3C 440738           | A3 |
| MAP6 4135                 | A3 |
| MAP7D1 55700              | A3 |
| MAP7D3 79649              | A3 |
| MARK1 4139                | A3 |
| MARK2 2011                | A3 |
| MARVELD2 153562           | A3 |
| MAS1L 116511              | A3 |
| MCAM 4162                 | A3 |
| MCM3 4172                 | A3 |
| MCTP1 79772               | A3 |
| MDFIC 29969               | A3 |
| MECOM 2122                | A3 |
| MEST 4232                 | A3 |



|               |    |
|---------------|----|
| METTL1 4234   | A3 |
| MFAP4 4239    | A3 |
| MFNG 4242     | A3 |
| MGLL 11343    | A3 |
| MIPOL1 145282 | A3 |
| MITF 4286     | A3 |
| MMD 23531     | A3 |
| MMP27 64066   | A3 |
| MMP28 79148   | A3 |
| MMRN1 22915   | A3 |
| MOBKL1B 55233 | A3 |
| MORN2 729967  | A3 |
| MOSC1 64757   | A3 |
| MOSPD1 56180  | A3 |
| MRAP 56246    | A3 |
| MRS2P2 729633 | A3 |
| MRV11 10335   | A3 |
| MSX1 4487     | A3 |
| MTA3 57504    | A3 |
| MTL5 9633     | A3 |
| MXD4 10608    | A3 |
| MXRA7 439921  | A3 |
| MYEOV 26579   | A3 |
| MYL9 10398    | A3 |
| MYO1C 4641    | A3 |
| MYRIP 25924   | A3 |
| NAGA 4668     | A3 |
| NBN 4683      | A3 |
| NCBP1 4686    | A3 |
| NCOA5 57727   | A3 |
| NCOA6 23054   | A3 |
| NIPA2 81614   | A3 |
| NIPSNAP1 8508 | A3 |
| NMB 4828      | A3 |
| NME6 10201    | A3 |
| NMUR1 10316   | A3 |
| NOLC1 9221    | A3 |
| NOMO1 23420   | A3 |
| NONO 4841     | A3 |
| NOVA2 4858    | A3 |
| NOV 4856      | A3 |
| NPR1 4881     | A3 |
| NRN1L 123904  | A3 |
| NRP1 8829     | A3 |
| NSF 4905      | A3 |
| NT5E 4907     | A3 |
| NUDT13 25961  | A3 |
| NUP155 9631   | A3 |
| OAF 220323    | A3 |
| OCLN 4950     | A3 |
| OLFML1 283298 | A3 |

|                    |    |
|--------------------|----|
| ORC5L 5001         | A3 |
| OVOL2 58495        | A3 |
| P4HTM 54681        | A3 |
| PABPC5 140886      | A3 |
| PALB2 79728        | A3 |
| PALM2-AKAP2 445815 | A3 |
| PALM 5064          | A3 |
| PAPOLA 10914       | A3 |
| PAPOLB 56903       | A3 |
| PARD6B 84612       | A3 |
| PARP3 10039        | A3 |
| PARVA 55742        | A3 |
| PASK 23178         | A3 |
| PCDH9 5101         | A3 |
| PCDHB4 56131       | A3 |
| PCDHGC3 5098       | A3 |
| PCOLCE2 26577      | A3 |
| PCSK5 5125         | A3 |
| PCYOX1 51449       | A3 |
| PDE1A 5136         | A3 |
| PDE8B 8622         | A3 |
| PDGFRL 5157        | A3 |
| PDIK1L 149420      | A3 |
| PDLIM1 9124        | A3 |
| PDRG1 81572        | A3 |
| PDZD2 23037        | A3 |
| PDZRN3 23024       | A3 |
| PECAM1 5175        | A3 |
| PFDN6 10471        | A3 |
| PGCP 10404         | A3 |
| PHF6 84295         | A3 |
| PHLDB1 23187       | A3 |
| PHLDB3 653583      | A3 |
| PI16 221476        | A3 |
| PIAS3 10401        | A3 |
| PIAS4 51588        | A3 |
| PID1 55022         | A3 |
| PIGZ 80235         | A3 |
| PJA1 64219         | A3 |
| PKDCC 91461        | A3 |
| PKDREJ 10343       | A3 |
| PKHD1L1 93035      | A3 |
| PKP3 11187         | A3 |
| PLA2G5 5322        | A3 |
| PLAC9 219348       | A3 |
| PLEKHA9 51054      | A3 |
| PLEKHB2 55041      | A3 |
| PLEKHF1 79156      | A3 |
| PLIN1 5346         | A3 |
| PLIN4 729359       | A3 |
| PLXNA4 91584       | A3 |

|                |    |
|----------------|----|
| PM20D1 148811  | A3 |
| PMP22 5376     | A3 |
| PMS2L5 5383    | A3 |
| PNO1 56902     | A3 |
| PODN 127435    | A3 |
| POLR3GL 84265  | A3 |
| PPARG 5468     | A3 |
| PPAT 5471      | A3 |
| PPM1H 57460    | A3 |
| PPM1M 132160   | A3 |
| PPME1 51400    | A3 |
| PPP1R12C 54776 | A3 |
| PPP1R1A 5502   | A3 |
| PPP1R3G 648791 | A3 |
| PRELP 5549     | A3 |
| PRIM1 5557     | A3 |
| PRKCZ 5590     | A3 |
| PRLR 5618      | A3 |
| PROCR 10544    | A3 |
| PRPF40A 55660  | A3 |
| PRPF4 9128     | A3 |
| PRPS2 5634     | A3 |
| PRR5 55615     | A3 |
| PRRT4 401399   | A3 |
| PRUNE2 158471  | A3 |
| PSME1 5720     | A3 |
| PTGES3 10728   | A3 |
| PTGIS 5740     | A3 |
| PTH1R 5745     | A3 |
| PTK6 5753      | A3 |
| PTPRB 5787     | A3 |
| PTPRM 5797     | A3 |
| PVRL3 25945    | A3 |
| R3HCC1 203069  | A3 |
| RAB19 401409   | A3 |
| RAB6B 51560    | A3 |
| RABEP2 79874   | A3 |
| RAD1 5810      | A3 |
| RAMP2 10266    | A3 |
| RASA3 22821    | A3 |
| RASD1 51655    | A3 |
| RASL11A 387496 | A3 |
| RASL12 51285   | A3 |
| RASSF7 8045    | A3 |
| RBBP5 5929     | A3 |
| RBM12B 389677  | A3 |
| RBP4 5950      | A3 |
| RBPJ 3516      | A3 |
| RBPMS2 348093  | A3 |
| RCAN2 10231    | A3 |
| RDH11 51109    | A3 |

|                 |    |
|-----------------|----|
| RDH5 5959       | A3 |
| REM1 28954      | A3 |
| RETSAT 54884    | A3 |
| RFC5 5985       | A3 |
| RFWD3 55159     | A3 |
| RFX5 5993       | A3 |
| RGS2 5997       | A3 |
| RHOQ 23433      | A3 |
| RIBC2 26150     | A3 |
| RILP 83547      | A3 |
| RIPK2 8767      | A3 |
| RNF130 55819    | A3 |
| RNF2 6045       | A3 |
| ROBO4 54538     | A3 |
| ROD1 9991       | A3 |
| ROGDI 79641     | A3 |
| RPE 6120        | A3 |
| RPL23AP32 56969 | A3 |
| RPS6KA2 6196    | A3 |
| RQCD1 9125      | A3 |
| RRAS 6237       | A3 |
| RRP12 23223     | A3 |
| RYK 6259        | A3 |
| S100A4 6275     | A3 |
| SAA1 6288       | A3 |
| SAMD12 401474   | A3 |
| SCARF1 8578     | A3 |
| SCMH1 22955     | A3 |
| SCN9A 6335      | A3 |
| SCTR 6344       | A3 |
| SCYL2 55681     | A3 |
| SCYL3 57147     | A3 |
| SDSL 113675     | A3 |
| SEC16A 9919     | A3 |
| SEC23B 10483    | A3 |
| SEC61A2 55176   | A3 |
| SELP 6403       | A3 |
| SEMA3A 10371    | A3 |
| SERPINF1 5176   | A3 |
| SERPINF2 5345   | A3 |
| SERPING1 710    | A3 |
| SET 6418        | A3 |
| SGCB 6443       | A3 |
| SGK2 10110      | A3 |
| SH2D3C 10044    | A3 |
| SH3GLB1 51100   | A3 |
| SH3RF3 344558   | A3 |
| SHISA3 152573   | A3 |
| SIK2 23235      | A3 |
| SKIV2L 6499     | A3 |
| SLC22A3 6581    | A3 |

|                   |    |
|-------------------|----|
| SLC25A17 10478    | A3 |
| SLC29A4 222962    | A3 |
| SLC39A9 55334     | A3 |
| SLC4A5 57835      | A3 |
| SLC9A3R1 9368     | A3 |
| SLC9A9 285195     | A3 |
| SLIT2 9353        | A3 |
| SLIT3 6586        | A3 |
| SMAD5OS 9597      | A3 |
| SMAD6 4091        | A3 |
| SOD3 6649         | A3 |
| SORBS1 10580      | A3 |
| SORBS3 10174      | A3 |
| SORD 6652         | A3 |
| SOX10 6663        | A3 |
| SPAG1 6674        | A3 |
| SPATA9 83890      | A3 |
| SPNS2 124976      | A3 |
| SPOPL 339745      | A3 |
| SQLE 6713         | A3 |
| SRP19 6728        | A3 |
| SRPK1 6732        | A3 |
| SRRT 51593        | A3 |
| SSR1 6745         | A3 |
| ST6GALNAC3 256435 | A3 |
| ST6GALNAC6 30815  | A3 |
| STAB2 55576       | A3 |
| STARD8 9754       | A3 |
| STK32A 202374     | A3 |
| STK40 83931       | A3 |
| STL 7955          | A3 |
| STX11 8676        | A3 |
| STX7 8417         | A3 |
| STX8 9482         | A3 |
| SUN1 23353        | A3 |
| SVIP 258010       | A3 |
| SYT8 90019        | A3 |
| TACC1 6867        | A3 |
| TAF1C 9013        | A3 |
| TAF2 6873         | A3 |
| TAGLN 6876        | A3 |
| TBC1D2B 23102     | A3 |
| TCN2 6948         | A3 |
| TDG 6996          | A3 |
| TEAD1 7003        | A3 |
| TEK 7010          | A3 |
| TET3 200424       | A3 |
| TFE3 7030         | A3 |
| THSD7B 80731      | A3 |
| THYN1 29087       | A3 |
| TIE1 7075         | A3 |

|                 |    |
|-----------------|----|
| TLCD1 116238    | A3 |
| TLL1 7092       | A3 |
| TLN1 7094       | A3 |
| TMBIM1 64114    | A3 |
| TMC2 117532     | A3 |
| TMEM125 128218  | A3 |
| TMEM132C 92293  | A3 |
| TMEM140 55281   | A3 |
| TMEM177 80775   | A3 |
| TMEM184A 202915 | A3 |
| TMEM20 159371   | A3 |
| TMEM22 80723    | A3 |
| TMEM35 59353    | A3 |
| TMEM37 140738   | A3 |
| TMEM41B 440026  | A3 |
| TMEM48 55706    | A3 |
| TMEM63C 57156   | A3 |
| TMEM97 27346    | A3 |
| TMPO 7112       | A3 |
| TNIP1 10318     | A3 |
| TNMD 64102      | A3 |
| TNS1 7145       | A3 |
| TOMM34 10953    | A3 |
| TOP1P1 7151     | A3 |
| TOP2A 7153      | A3 |
| TOR1AIP2 163590 | A3 |
| TPBG 7162       | A3 |
| TPPP3 51673     | A3 |
| TPRG1L 127262   | A3 |
| TPTE2P1 646405  | A3 |
| TRAFD1 10906    | A3 |
| TRERF1 55809    | A3 |
| TRIM14 9830     | A3 |
| TRIM62 55223    | A3 |
| TRIP10 9322     | A3 |
| TRIP13 9319     | A3 |
| TRPS1 7227      | A3 |
| TRUB2 26995     | A3 |
| TSEN54 283989   | A3 |
| TSPAN2 10100    | A3 |
| TSPAN4 7106     | A3 |
| TTC26 79989     | A3 |
| TTC7B 145567    | A3 |
| TUBB2A 7280     | A3 |
| TUBB6 84617     | A3 |
| TUSC5 286753    | A3 |
| TWIST2 117581   | A3 |
| TYRO3 7301      | A3 |
| UBE2G2 7327     | A3 |
| UBE2K 3093      | A3 |
| UBXN2B 137886   | A3 |

|                  |    |
|------------------|----|
| UGP2 7360        | A3 |
| UMPS 7372        | A3 |
| URB2 9816        | A3 |
| UROD 7389        | A3 |
| USP37 57695      | A3 |
| VEGFB 7423       | A3 |
| VEGFC 7424       | A3 |
| VGLL3 389136     | A3 |
| VIM 7431         | A3 |
| VPS25 84313      | A3 |
| VWF 7450         | A3 |
| WDR12 55759      | A3 |
| WDR13 64743      | A3 |
| WDR55 54853      | A3 |
| WDR76 79968      | A3 |
| WISP2 8839       | A3 |
| WNT9B 7484       | A3 |
| WTIP 126374      | A3 |
| XBP1 7494        | A3 |
| XPR1 9213        | A3 |
| XRCC5 7520       | A3 |
| XYLB 9942        | A3 |
| YARS 8565        | A3 |
| YIPF6 286451     | A3 |
| YTHDF1 54915     | A3 |
| ZBTB9 221504     | A3 |
| ZC3H15 55854     | A3 |
| ZCCHC24 219654   | A3 |
| ZDHHC13 54503    | A3 |
| ZDHHC8 29801     | A3 |
| ZEB2 9839        | A3 |
| ZFP36L1 677      | A3 |
| ZFPM2 23414      | A3 |
| ZFYVE21 79038    | A3 |
| ZNF395 55893     | A3 |
| ZNF423 23090     | A3 |
| ZNF48 197407     | A3 |
| ZNF623 9831      | A3 |
| ZNF707 286075    | A3 |
| ZNF75A 7627      | A3 |
| ZNF764 92595     | A3 |
| ZNF765 91661     | A3 |
| ZNF833 401898    | A3 |
| ZNF93 81931      | A3 |
| ZSCAN12P1 221584 | A3 |
| ZSCAN16 80345    | A3 |
| ACAD8 27034      | A4 |
| AGAP4 119016     | A4 |
| AHSA2 130872     | A4 |
| ARIH2 10425      | A4 |
| C6orf174 387104  | A4 |

|                      |    |
|----------------------|----|
| C7orf28B 221960      | A4 |
| CHD2 1106            | A4 |
| CMC1 152100          | A4 |
| COX6A1 1337          | A4 |
| CROCCL1 84809        | A4 |
| CROCCL2 114819       | A4 |
| CSE1L 1434           | A4 |
| DEDD 9191            | A4 |
| DENND2C 163259       | A4 |
| DLG2 1740            | A4 |
| DRD2 1813            | A4 |
| EPC2 26122           | A4 |
| FAM129A 116496       | A4 |
| FAM21C 253725        | A4 |
| FAM72A 729533        | A4 |
| FLCN 201163          | A4 |
| FLG 2312             | A4 |
| GNB5 10681           | A4 |
| GNPAT 8443           | A4 |
| GPR113 165082        | A4 |
| HAX1 10456           | A4 |
| HERC1 8925           | A4 |
| IKZF5 64376          | A4 |
| ING5 84289           | A4 |
| JMJD7-PLA2G4B 8681   | A4 |
| KIDINS220 57498      | A4 |
| KIF7 374654          | A4 |
| KLHL2 11275          | A4 |
| LAMA1 284217         | A4 |
| LBXCOR1 390598       | A4 |
| LOC283174 283174     | A4 |
| MST1P2 11209         | A4 |
| MYO9A 4649           | A4 |
| NDUFAB1 4706         | A4 |
| NFRKB 4798           | A4 |
| PLD2 5338            | A4 |
| RNF165 494470        | A4 |
| RPS6KC1 26750        | A4 |
| SEC61G 23480         | A4 |
| SEPP1 6414           | A4 |
| SETBP1 26040         | A4 |
| SETDB2 83852         | A4 |
| SGSM1 129049         | A4 |
| SH3RF2 153769        | A4 |
| SNORD116-4 100033416 | A4 |
| SYTL3 94120          | A4 |
| TNS4 84951           | A4 |
| TRIM66 9866          | A4 |
| TTC21B 79809         | A4 |
| VPS72 6944           | A4 |
| ZBTB49 166793        | A4 |



|                 |    |
|-----------------|----|
| BEND6 221336    | A5 |
| C2orf71 388939  | A5 |
| C3orf58 205428  | A5 |
| C9orf156 51531  | A5 |
| C9orf66 157983  | A5 |
| CAPZB 832       | A5 |
| CDC42EP3 10602  | A5 |
| CDRT4 284040    | A5 |
| CERCAM 51148    | A5 |
| CHST9 83539     | A5 |
| CILP2 148113    | A5 |
| COL1A2 1278     | A5 |
| COL3A1 1281     | A5 |
| CPAMD8 27151    | A5 |
| CST1 1469       | A5 |
| DIMT1L 27292    | A5 |
| FAM119B 25895   | A5 |
| FRMD3 257019    | A5 |
| GANC 2595       | A5 |
| INVS 27130      | A5 |
| IRS1 3667       | A5 |
| KCTD18 130535   | A5 |
| L3MBTL4 91133   | A5 |
| LEPRE1 64175    | A5 |
| MAD2L2 10459    | A5 |
| MON2 23041      | A5 |
| NFE2L2 4780     | A5 |
| NFIX 4784       | A5 |
| PHF3 23469      | A5 |
| PLD1 5337       | A5 |
| PRDXDD1P 344405 | A5 |
| PTPRZ1 5803     | A5 |
| RPUSD4 84881    | A5 |
| SEMA6D 80031    | A5 |
| SIRPB1 10326    | A5 |
| STOX2 56977     | A5 |
| TGFB1 7040      | A5 |
| THBS2 7058      | A5 |
| TRMT112 51504   | A5 |
| UBE2M 9040      | A5 |
| ZMAT3 64393     | A5 |
| ZNF189 7743     | A5 |
| ZNF426 79088    | A5 |
| ZNF510 22869    | A5 |
| ANKMY2 57037    | A6 |
| ATP6V0C 527     | A6 |
| BHLHE41 79365   | A6 |
| CCL28 56477     | A6 |
| CDNF 441549     | A6 |
| CTTNBP2 83992   | A6 |
| DNAJB11 51726   | A6 |

|                  |    |
|------------------|----|
| FAM13B 51306     | A6 |
| FAT2 2196        | A6 |
| KCNC4 3749       | A6 |
| KCTD5 54442      | A6 |
| LOC441869 441869 | A6 |
| LOC728723 728723 | A6 |
| LRP5 4041        | A6 |
| MRPS12 6183      | A6 |
| PKM2 5315        | A6 |
| PMF1 11243       | A6 |
| RAG1 5896        | A6 |
| RHOU 58480       | A6 |
| RNASE7 84659     | A6 |
| SHPRH 257218     | A6 |
| SMARCA2 6595     | A6 |
| TBC1D14 57533    | A6 |
| TTLL11 158135    | A6 |
| VPS13D 55187     | A6 |
| YIF1B 90522      | A6 |
| ZBTB38 253461    | A6 |
| ZDBF2 57683      | A6 |
| A2M 2            | A7 |
| ACTG2 72         | A7 |
| ANKAR 150709     | A7 |
| AVPR2 554        | A7 |
| C13orf15 28984   | A7 |
| C14orf143 90141  | A7 |
| C14orf28 122525  | A7 |
| C18orf45 85019   | A7 |
| C6orf162 57150   | A7 |
| CAPZA3 93661     | A7 |
| CASP12 120329    | A7 |
| CCL14 6358       | A7 |
| CD80 941         | A7 |
| CHST3 9469       | A7 |
| CTF1 1489        | A7 |
| CXorf42 158801   | A7 |
| CYP11A1 1583     | A7 |
| CYYR1 116159     | A7 |
| D4S234E 27065    | A7 |
| ELAC1 55520      | A7 |
| EPHB1 2047       | A7 |
| FAHD2A 51011     | A7 |
| FAM102A 399665   | A7 |
| FAM86D 692099    | A7 |
| FAP 2191         | A7 |
| FBXW7 55294      | A7 |
| FES 2242         | A7 |
| FUT4 2526        | A7 |
| HDAC4 9759       | A7 |
| HOXD3 3232       | A7 |

|                        |    |
|------------------------|----|
| ID4 3400               | A7 |
| KCTD9 54793            | A7 |
| KPNA2 3838             | A7 |
| LHX6 26468             | A7 |
| LIMK1 3984             | A7 |
| LIX1L 128077           | A7 |
| LOC100130691 100130691 | A7 |
| LOC389705 389705       | A7 |
| LRFN5 145581           | A7 |
| LRRC15 131578          | A7 |
| MAFF 23764             | A7 |
| MBIP 51562             | A7 |
| MEOX1 4222             | A7 |
| MET 4233               | A7 |
| NCALD 83988            | A7 |
| NPFF 8620              | A7 |
| NUDT7 283927           | A7 |
| PCDHGA3 56112          | A7 |
| PDE7B 27115            | A7 |
| PPP2CA 5515            | A7 |
| PROC 5624              | A7 |
| RAB3A 5864             | A7 |
| RBM45 129831           | A7 |
| RBMS1 5937             | A7 |
| RFXAP 5994             | A7 |
| RIMKLB 57494           | A7 |
| SEMA6A 57556           | A7 |
| SFRP1 6422             | A7 |
| SIRPA 140885           | A7 |
| SLC17A7 57030          | A7 |
| SLC23A2 9962           | A7 |
| SOCS2 8835             | A7 |
| SPARCL1 8404           | A7 |
| ST7OT1 93653           | A7 |
| TBL2 26608             | A7 |
| TMOD2 29767            | A7 |
| TRIOBP 11078           | A7 |
| TUB 7275               | A7 |
| VAMP8 8673             | A7 |
| VAV3 10451             | A7 |
| VCAN 1462              | A7 |
| ABCA6 23460            | A8 |
| ABCA9 10350            | A8 |
| ABCB5 340273           | A8 |
| ACBD6 84320            | A8 |
| ACRC 93953             | A8 |
| ADHIC 126              | A8 |
| ALS2CL 259173          | A8 |
| AMY2B 280              | A8 |
| ARHGAP10 79658         | A8 |
| C10orf105 414152       | A8 |

|                  |    |
|------------------|----|
| C12orf48 55010   | A8 |
| C1orf213 148898  | A8 |
| C22orf23 84645   | A8 |
| C22orf39 128977  | A8 |
| C3orf64 285203   | A8 |
| C4orf3 401152    | A8 |
| C7orf51 222950   | A8 |
| CACYBP 27101     | A8 |
| CCNDBP1 23582    | A8 |
| CELF6 60677      | A8 |
| CENPM 79019      | A8 |
| CENPT 80152      | A8 |
| COPA 1314        | A8 |
| CPEB1 64506      | A8 |
| CPE 1363         | A8 |
| CPSF3 51692      | A8 |
| CREBL2 1389      | A8 |
| DAP3 7818        | A8 |
| DBF4 10926       | A8 |
| DNASE1L3 1776    | A8 |
| DPM2 8818        | A8 |
| DSN1 79980       | A8 |
| E2F1 1869        | A8 |
| ECHDC2 55268     | A8 |
| ENAH 55740       | A8 |
| EPRS 2058        | A8 |
| FAM160A2 84067   | A8 |
| FAM49A 81553     | A8 |
| FAM71D 161142    | A8 |
| FLAD1 80308      | A8 |
| GBAP1 2630       | A8 |
| GEN1 348654      | A8 |
| GOLGA6L10 647042 | A8 |
| GPR44 11251      | A8 |
| GPRIN1 114787    | A8 |
| HCG2P7 80867     | A8 |
| HPRT1 3251       | A8 |
| IL17B 27190      | A8 |
| IL6R 3570        | A8 |
| ILF2 3608        | A8 |
| INPP5B 3633      | A8 |
| LENG8 114823     | A8 |
| LEPREL1 55214    | A8 |
| LEPR 3953        | A8 |
| LMNB1 4001       | A8 |
| LOC257358 257358 | A8 |
| LOC286367 286367 | A8 |
| LOC728819 728819 | A8 |
| LOC91316 91316   | A8 |
| LYNX1 66004      | A8 |
| LYSMD4 145748    | A8 |

|               |    |
|---------------|----|
| MAN2C1 4123   | A8 |
| MAP2K5 5607   | A8 |
| MYH11 4629    | A8 |
| MYO15B 80022  | A8 |
| NECAB1 64168  | A8 |
| NTN5 126147   | A8 |
| OSR1 130497   | A8 |
| OTUD3 23252   | A8 |
| PAQR4 124222  | A8 |
| PKD1 5310     | A8 |
| PPIEL 728448  | A8 |
| PTGFR 5737    | A8 |
| PYROXD2 84795 | A8 |
| RBL2 5934     | A8 |
| RBM5 10181    | A8 |
| RFWD2 64326   | A8 |
| RGAG4 340526  | A8 |
| RNASE4 6038   | A8 |
| RNPC3 55599   | A8 |
| RP1L1 94137   | A8 |
| RYR3 6263     | A8 |
| SDC3 9672     | A8 |
| SDHC 6391     | A8 |
| SFRS5 6430    | A8 |
| SKA1 220134   | A8 |
| SLC37A1 54020 | A8 |
| SLC7A14 57709 | A8 |
| SMAD3 4088    | A8 |
| SMG6 23293    | A8 |
| SNRPD1 6632   | A8 |
| SNX1 6642     | A8 |
| SNX33 257364  | A8 |
| STIM2 57620   | A8 |
| STX6 10228    | A8 |
| TADA1 117143  | A8 |
| TBC1D13 54662 | A8 |
| TBC1D7 51256  | A8 |
| TESC 54997    | A8 |
| TFB2M 64216   | A8 |
| TPCN1 53373   | A8 |
| TPPP 11076    | A8 |
| TRIM68 55128  | A8 |
| TSSK3 81629   | A8 |
| TTC23 64927   | A8 |
| TTLL3 26140   | A8 |
| WASF3 10810   | A8 |
| WDR34 89891   | A8 |
| WDTC1 23038   | A8 |
| WSB1 26118    | A8 |
| ? 100133144   | B2 |
| ? 100134869   | B2 |

|                |    |
|----------------|----|
| ? 10357        | B2 |
| ? 155060       | B2 |
| ? 26823        | B2 |
| ? 340602       | B2 |
| ? 388795       | B2 |
| ? 390284       | B2 |
| ? 391343       | B2 |
| ? 391714       | B2 |
| ? 442388       | B2 |
| ? 553137       | B2 |
| ? 57714        | B2 |
| ? 645851       | B2 |
| ? 652919       | B2 |
| ? 728603       | B2 |
| ? 728788       | B2 |
| ? 729884       | B2 |
| ? 8225         | B2 |
| ? 90288        | B2 |
| A1CF 29974     | B2 |
| A2BP1 54715    | B2 |
| A2LD1 87769    | B2 |
| A2ML1 144568   | B2 |
| A4GALT 53947   | B2 |
| A4GNT 51146    | B2 |
| AAA1 404744    | B2 |
| AAAS 8086      | B2 |
| AACSL 729522   | B2 |
| AACS 65985     | B2 |
| AADACL2 344752 | B2 |
| AADACL3 126767 | B2 |
| AADACL4 343066 | B2 |
| AADAT 51166    | B2 |
| AAK1 22848     | B2 |
| AAMP 14        | B2 |
| AANAT 15       | B2 |
| AARS2 57505    | B2 |
| AARSD1 80755   | B2 |
| AARS 16        | B2 |
| AASDHPPT 60496 | B2 |
| AASDH 132949   | B2 |
| AATF 26574     | B2 |
| AATK 9625      | B2 |
| ABAT 18        | B2 |
| ABCA11P 79963  | B2 |
| ABCA12 26154   | B2 |
| ABCA13 154664  | B2 |
| ABCA17P 650655 | B2 |
| ABCA2 20       | B2 |
| ABCA3 21       | B2 |
| ABCA4 24       | B2 |
| ABCA7 10347    | B2 |

|                |    |
|----------------|----|
| ABCB11 8647    | B2 |
| ABCB4 5244     | B2 |
| ABCB6 10058    | B2 |
| ABCB7 22       | B2 |
| ABCC10 89845   | B2 |
| ABCC11 85320   | B2 |
| ABCC12 94160   | B2 |
| ABCC13 150000  | B2 |
| ABCC1 4363     | B2 |
| ABCC2 1244     | B2 |
| ABCC3 8714     | B2 |
| ABCC4 10257    | B2 |
| ABCC6P2 730013 | B2 |
| ABCC8 6833     | B2 |
| ABCD1 215      | B2 |
| ABCE1 6059     | B2 |
| ABCF2 10061    | B2 |
| ABCG2 9429     | B2 |
| ABCG4 64137    | B2 |
| ABCG5 64240    | B2 |
| ABCG8 64241    | B2 |
| ABHD10 55347   | B2 |
| ABHD12B 145447 | B2 |
| ABHD13 84945   | B2 |
| ABHD14A 25864  | B2 |
| ABHD15 116236  | B2 |
| ABHD2 11057    | B2 |
| ABHD3 171586   | B2 |
| ABHD4 63874    | B2 |
| ABHD5 51099    | B2 |
| ABHD8 79575    | B2 |
| ABI1 10006     | B2 |
| ABI2 10152     | B2 |
| ABI3 51225     | B2 |
| ABLIM2 84448   | B2 |
| ABO 28         | B2 |
| ABP1 26        | B2 |
| ABRA 137735    | B2 |
| ABT1 29777     | B2 |
| ABTB2 25841    | B2 |
| ACAA1 30       | B2 |
| ACACA 31       | B2 |
| ACAD10 80724   | B2 |
| ACAD9 28976    | B2 |
| ACADM 34       | B2 |
| ACADSB 36      | B2 |
| ACAN 176       | B2 |
| ACAP1 9744     | B2 |
| ACAP2 23527    | B2 |
| ACAP3 116983   | B2 |
| ACAT1 38       | B2 |

|               |    |
|---------------|----|
| ACBD5 91452   | B2 |
| ACBD7 414149  | B2 |
| ACCN1 40      | B2 |
| ACCN2 41      | B2 |
| ACCN3 9311    | B2 |
| ACCN4 55515   | B2 |
| ACCN5 51802   | B2 |
| ACCSL 390110  | B2 |
| ACD 65057     | B2 |
| ACE2 59272    | B2 |
| ACER1 125981  | B2 |
| ACER2 340485  | B2 |
| ACER3 55331   | B2 |
| ACE 1636      | B2 |
| ACHE 43       | B2 |
| ACIN1 22985   | B2 |
| ACLY 47       | B2 |
| ACMSD 130013  | B2 |
| ACN9 57001    | B2 |
| ACO2 50       | B2 |
| ACOT11 26027  | B2 |
| ACOT12 134526 | B2 |
| ACOT13 55856  | B2 |
| ACOT1 641371  | B2 |
| ACOT2 10965   | B2 |
| ACOT4 122970  | B2 |
| ACOT6 641372  | B2 |
| ACOX1 51      | B2 |
| ACOX2 8309    | B2 |
| ACOX3 8310    | B2 |
| ACOXL 55289   | B2 |
| ACP5 54       | B2 |
| ACP6 51205    | B2 |
| ACPL2 92370   | B2 |
| ACPP 55       | B2 |
| ACPT 93650    | B2 |
| ACRBP 84519   | B2 |
| ACRV1 56      | B2 |
| ACSBG1 23205  | B2 |
| ACSF2 80221   | B2 |
| ACSF3 197322  | B2 |
| ACSL3 2181    | B2 |
| ACSL6 23305   | B2 |
| ACSM1 116285  | B2 |
| ACSM2A 123876 | B2 |
| ACSM2B 348158 | B2 |
| ACSM3 6296    | B2 |
| ACSM4 341392  | B2 |
| ACSS1 84532   | B2 |
| ACSS3 79611   | B2 |
| ACTA1 58      | B2 |



|                 |    |
|-----------------|----|
| ACTBL2 345651   | B2 |
| ACTC1 70        | B2 |
| ACTL6B 51412    | B2 |
| ACTL7A 10881    | B2 |
| ACTL7B 10880    | B2 |
| ACTL8 81569     | B2 |
| ACTL9 284382    | B2 |
| ACTN1 87        | B2 |
| ACTN2 88        | B2 |
| ACTN3 89        | B2 |
| ACTN4 81        | B2 |
| ACTR10 55860    | B2 |
| ACTR1A 10121    | B2 |
| ACTR3B 57180    | B2 |
| ACTR3C 653857   | B2 |
| ACTR5 79913     | B2 |
| ACTR6 64431     | B2 |
| ACTR8 93973     | B2 |
| ACTRT1 139741   | B2 |
| ACTRT2 140625   | B2 |
| ACVR1B 91       | B2 |
| ACVR1 90        | B2 |
| ACVR2B 93       | B2 |
| ACY1 95         | B2 |
| ACY3 91703      | B2 |
| ACYP1 97        | B2 |
| ACYP2 98        | B2 |
| ADAD1 132612    | B2 |
| ADAL 161823     | B2 |
| ADAM10 102      | B2 |
| ADAM11 4185     | B2 |
| ADAM17 6868     | B2 |
| ADAM18 8749     | B2 |
| ADAM20 8748     | B2 |
| ADAM21P1 145241 | B2 |
| ADAM21 8747     | B2 |
| ADAM22 53616    | B2 |
| ADAM23 8745     | B2 |
| ADAM28 10863    | B2 |
| ADAM29 11086    | B2 |
| ADAM2 2515      | B2 |
| ADAM30 11085    | B2 |
| ADAM32 203102   | B2 |
| ADAM3A 1587     | B2 |
| ADAM5P 255926   | B2 |
| ADAM6 8755      | B2 |
| ADAM9 8754      | B2 |
| ADAMDEC1 27299  | B2 |
| ADAMTS10 81794  | B2 |
| ADAMTS13 11093  | B2 |
| ADAMTS15 170689 | B2 |

|                 |    |
|-----------------|----|
| ADAMTS16 170690 | B2 |
| ADAMTS17 170691 | B2 |
| ADAMTS19 171019 | B2 |
| ADAMTS20 80070  | B2 |
| ADAMTS2 9509    | B2 |
| ADAMTS4 9507    | B2 |
| ADAMTS8 11095   | B2 |
| ADAMTSL1 92949  | B2 |
| ADAMTSL3 57188  | B2 |
| ADAMTSL5 339366 | B2 |
| ADAP2 55803     | B2 |
| ADARB2 105      | B2 |
| ADAT1 23536     | B2 |
| ADAT3 113179    | B2 |
| ADA 100         | B2 |
| ADCK1 57143     | B2 |
| ADCK4 79934     | B2 |
| ADCY10 55811    | B2 |
| ADCY1 107       | B2 |
| ADCY2 108       | B2 |
| ADCY7 113       | B2 |
| ADCY8 114       | B2 |
| ADCY9 115       | B2 |
| ADCYAP1 116     | B2 |
| ADD2 119        | B2 |
| ADH7 131        | B2 |
| ADI1 55256      | B2 |
| ADIG 149685     | B2 |
| ADIPOR2 79602   | B2 |
| ADK 132         | B2 |
| ADNP2 22850     | B2 |
| ADORA1 134      | B2 |
| ADORA2B 136     | B2 |
| ADO 84890       | B2 |
| ADPGK 83440     | B2 |
| ADPRHL1 113622  | B2 |
| ADRA1B 147      | B2 |
| ADRA1D 146      | B2 |
| ADRA2B 151      | B2 |
| ADRA2C 152      | B2 |
| ADRB1 153       | B2 |
| ADRB3 155       | B2 |
| ADRBK1 156      | B2 |
| ADSL 158        | B2 |
| ADSSL1 122622   | B2 |
| AEBP2 121536    | B2 |
| AEN 64782       | B2 |
| AES 166         | B2 |
| AFAP1L2 84632   | B2 |
| AFAP1 60312     | B2 |
| AFARP1 246182   | B2 |

|               |    |
|---------------|----|
| AFF2 2334     | B2 |
| AFF3 3899     | B2 |
| AFF4 27125    | B2 |
| AFG3L1 172    | B2 |
| AFG3L2 10939  | B2 |
| AFMID 125061  | B2 |
| AFM 173       | B2 |
| AFP 174       | B2 |
| AGAP1 116987  | B2 |
| AGAP2 116986  | B2 |
| AGAP3 116988  | B2 |
| AGAP5 729092  | B2 |
| AGAP6 414189  | B2 |
| AGAP7 653268  | B2 |
| AGAP8 728404  | B2 |
| AGA 175       | B2 |
| AGBL1 123624  | B2 |
| AGBL2 79841   | B2 |
| AGBL3 340351  | B2 |
| AGBL4 84871   | B2 |
| AGBL5 60509   | B2 |
| AGFG1 3267    | B2 |
| AGGF1 55109   | B2 |
| AGK 55750     | B2 |
| AGL 178       | B2 |
| AGMAT 79814   | B2 |
| AGPAT1 10554  | B2 |
| AGPAT3 56894  | B2 |
| AGPAT5 55326  | B2 |
| AGPAT6 137964 | B2 |
| AGPAT9 84803  | B2 |
| AGPHD1 123688 | B2 |
| AGPS 8540     | B2 |
| AGR2 10551    | B2 |
| AGRN 375790   | B2 |
| AGRP 181      | B2 |
| AGTPBP1 23287 | B2 |
| AGTR1 185     | B2 |
| AGTR2 186     | B2 |
| AGT 183       | B2 |
| AGXT2L1 64850 | B2 |
| AGXT2 64902   | B2 |
| AGXT 189      | B2 |
| AHCYL1 10768  | B2 |
| AHCYL2 23382  | B2 |
| AHI1 54806    | B2 |
| AHNAK2 113146 | B2 |
| AHRR 57491    | B2 |
| AHR 196       | B2 |
| AHSG 197      | B2 |
| AHSP 51327    | B2 |

|                 |    |
|-----------------|----|
| AICDA 57379     | B2 |
| AIDA 64853      | B2 |
| AIF1 199        | B2 |
| AIFM3 150209    | B2 |
| AIM1L 55057     | B2 |
| AIM1 202        | B2 |
| AIM2 9447       | B2 |
| AIMP1 9255      | B2 |
| AIPL1 23746     | B2 |
| AIP 9049        | B2 |
| AIRE 326        | B2 |
| AK1 203         | B2 |
| AK2 204         | B2 |
| AK3L1 205       | B2 |
| AK7 122481      | B2 |
| AKAP10 11216    | B2 |
| AKAP14 158798   | B2 |
| AKAP4 8852      | B2 |
| AKAP8L 26993    | B2 |
| AKAP8 10270     | B2 |
| AKAP9 10142     | B2 |
| AKD1 221264     | B2 |
| AKIRIN1 79647   | B2 |
| AKNAD1 254268   | B2 |
| AKNA 80709      | B2 |
| AKR1A1 10327    | B2 |
| AKR1B10 57016   | B2 |
| AKR1B15 441282  | B2 |
| AKR1B1 231      | B2 |
| AKR1C4 1109     | B2 |
| AKR1CL1 340811  | B2 |
| AKR1D1 6718     | B2 |
| AKR1E2 83592    | B2 |
| AKR7A2 8574     | B2 |
| AKR7A3 22977    | B2 |
| AKR7L 246181    | B2 |
| AKT1S1 84335    | B2 |
| AKT2 208        | B2 |
| AKT3 10000      | B2 |
| AKTIP 64400     | B2 |
| ALAS1 211       | B2 |
| ALAS2 212       | B2 |
| ALB 213         | B2 |
| ALCAM 214       | B2 |
| ALDH16A1 126133 | B2 |
| ALDH1L2 160428  | B2 |
| ALDH3A1 218     | B2 |
| ALDH3B1 221     | B2 |
| ALDH3B2 222     | B2 |
| ALDH4A1 8659    | B2 |
| ALDH5A1 7915    | B2 |

|                 |    |
|-----------------|----|
| ALDH6A1 4329    | B2 |
| ALDH8A1 64577   | B2 |
| ALDH9A1 223     | B2 |
| ALDOA 226       | B2 |
| ALDOB 229       | B2 |
| ALG10B 144245   | B2 |
| ALG10 84920     | B2 |
| ALG12 79087     | B2 |
| ALG13 79868     | B2 |
| ALG14 199857    | B2 |
| ALG1L2 644974   | B2 |
| ALG1L 200810    | B2 |
| ALG2 85365      | B2 |
| ALG5 29880      | B2 |
| ALG8 79053      | B2 |
| ALG9 79796      | B2 |
| ALKBH1 8846     | B2 |
| ALKBH2 121642   | B2 |
| ALKBH4 54784    | B2 |
| ALKBH5 54890    | B2 |
| ALKBH7 84266    | B2 |
| ALKBH8 91801    | B2 |
| ALK 238         | B2 |
| ALLC 55821      | B2 |
| ALMS1P 200420   | B2 |
| ALMS1 7840      | B2 |
| ALOX12B 242     | B2 |
| ALOX12P2 245    | B2 |
| ALOX12 239      | B2 |
| ALOX15B 247     | B2 |
| ALOX15 246      | B2 |
| ALOX5AP 241     | B2 |
| ALOX5 240       | B2 |
| ALOXE3 59344    | B2 |
| ALPI 248        | B2 |
| ALPK1 80216     | B2 |
| ALPK2 115701    | B2 |
| ALPK3 57538     | B2 |
| ALPPL2 251      | B2 |
| ALPP 250        | B2 |
| ALS2CR11 151254 | B2 |
| ALS2CR12 130540 | B2 |
| ALS2 57679      | B2 |
| ALX1 8092       | B2 |
| ALX3 257        | B2 |
| AMAC1L2 83650   | B2 |
| AMAC1L3 643664  | B2 |
| AMAC1 146861    | B2 |
| AMBN 258        | B2 |
| AMBP 259        | B2 |
| AMBRA1 55626    | B2 |

|                        |    |
|------------------------|----|
| AMD1 262               | B2 |
| AMDHD1 144193          | B2 |
| AMDHD2 51005           | B2 |
| AMELX 265              | B2 |
| AMFR 267               | B2 |
| AMHR2 269              | B2 |
| AMH 268                | B2 |
| AMICA1 120425          | B2 |
| AMMECR1L 83607         | B2 |
| AMN1 196394            | B2 |
| AMN 81693              | B2 |
| AMOT 154796            | B2 |
| AMPD1 270              | B2 |
| AMPD2 271              | B2 |
| AMPD3 272              | B2 |
| AMPH 273               | B2 |
| AMTN 401138            | B2 |
| AMY1A 276              | B2 |
| AMY2A 279              | B2 |
| AMZ1 155185            | B2 |
| AMZ2P1 201283          | B2 |
| ANAPC10 10393          | B2 |
| ANAPC13 25847          | B2 |
| ANAPC16 119504         | B2 |
| ANAPC1 64682           | B2 |
| ANAPC2 29882           | B2 |
| ANAPC5 51433           | B2 |
| ANGEL1 23357           | B2 |
| ANGPT2 285             | B2 |
| ANGPTL3 27329          | B2 |
| ANGPTL5 253935         | B2 |
| ANK1 286               | B2 |
| ANK3 288               | B2 |
| ANKFN1 162282          | B2 |
| ANKHD1-EIF4EBP3 404734 | B2 |
| ANKHD1 54882           | B2 |
| ANKH 56172             | B2 |
| ANKIB1 54467           | B2 |
| ANKLE1 126549          | B2 |
| ANKLE2 23141           | B2 |
| ANKMY1 51281           | B2 |
| ANKRA2 57763           | B2 |
| ANKRD10 55608          | B2 |
| ANKRD12 23253          | B2 |
| ANKRD13A 88455         | B2 |
| ANKRD13B 124930        | B2 |
| ANKRD13C 81573         | B2 |
| ANKRD13D 338692        | B2 |
| ANKRD16 54522          | B2 |
| ANKRD17 26057          | B2 |
| ANKRD19 138649         | B2 |

|                  |    |
|------------------|----|
| ANKRD1 27063     | B2 |
| ANKRD20A3 441425 | B2 |
| ANKRD20A4 728747 | B2 |
| ANKRD20B 729171  | B2 |
| ANKRD23 200539   | B2 |
| ANKRD24 170961   | B2 |
| ANKRD26P1 124149 | B2 |
| ANKRD26 22852    | B2 |
| ANKRD27 84079    | B2 |
| ANKRD28 23243    | B2 |
| ANKRD2 26287     | B2 |
| ANKRD30A 91074   | B2 |
| ANKRD30B 374860  | B2 |
| ANKRD31 256006   | B2 |
| ANKRD33 341405   | B2 |
| ANKRD34A 284615  | B2 |
| ANKRD34B 340120  | B2 |
| ANKRD34C 390616  | B2 |
| ANKRD36BP1 84832 | B2 |
| ANKRD36B 57730   | B2 |
| ANKRD37 353322   | B2 |
| ANKRD39 51239    | B2 |
| ANKRD42 338699   | B2 |
| ANKRD43 134548   | B2 |
| ANKRD44 91526    | B2 |
| ANKRD45 339416   | B2 |
| ANKRD46 157567   | B2 |
| ANKRD49 54851    | B2 |
| ANKRD50 57182    | B2 |
| ANKRD52 283373   | B2 |
| ANKRD54 129138   | B2 |
| ANKRD55 79722    | B2 |
| ANKRD56 345079   | B2 |
| ANKRD57 65124    | B2 |
| ANKRD7 56311     | B2 |
| ANKRD9 122416    | B2 |
| ANKS1B 56899     | B2 |
| ANKS3 124401     | B2 |
| ANKS4B 257629    | B2 |
| ANKS6 203286     | B2 |
| ANKZF1 55139     | B2 |
| ANO10 55129      | B2 |
| ANO1 55107       | B2 |
| ANO3 63982       | B2 |
| ANO5 203859      | B2 |
| ANO7 50636       | B2 |
| ANO8 57719       | B2 |
| ANP32A 8125      | B2 |
| ANP32B 10541     | B2 |
| ANP32C 23520     | B2 |
| ANP32D 23519     | B2 |

|                |    |
|----------------|----|
| ANPEP 290      | B2 |
| ANTXR1 84168   | B2 |
| ANTXRL 195977  | B2 |
| ANUBL1 93550   | B2 |
| ANXA10 11199   | B2 |
| ANXA13 312     | B2 |
| ANXA2P1 303    | B2 |
| ANXA2P2 304    | B2 |
| ANXA2P3 305    | B2 |
| ANXA2 302      | B2 |
| ANXA4 307      | B2 |
| ANXA5 308      | B2 |
| ANXA7 310      | B2 |
| ANXA8L1 728113 | B2 |
| ANXA8L2 244    | B2 |
| ANXA8 653145   | B2 |
| AOAH 313       | B2 |
| AOX2P 344454   | B2 |
| AP1B1 162      | B2 |
| AP1G1 164      | B2 |
| AP1M1 8907     | B2 |
| AP1S2 8905     | B2 |
| AP2A1 160      | B2 |
| AP2B1 163      | B2 |
| AP3B2 8120     | B2 |
| AP3M1 26985    | B2 |
| AP3M2 10947    | B2 |
| AP3S1 1176     | B2 |
| AP3S2 10239    | B2 |
| AP4B1 10717    | B2 |
| AP4E1 23431    | B2 |
| AP4S1 11154    | B2 |
| APAF1 317      | B2 |
| APBA2 321      | B2 |
| APBA3 9546     | B2 |
| APBB2 323      | B2 |
| APBB3 10307    | B2 |
| APC2 10297     | B2 |
| APC 324        | B2 |
| APEX1 328      | B2 |
| APH1B 83464    | B2 |
| API5 8539      | B2 |
| APIP 51074     | B2 |
| APLNR 187      | B2 |
| APLN 8862      | B2 |
| APLP1 333      | B2 |
| APLP2 334      | B2 |
| APOA1 335      | B2 |
| APOA2 336      | B2 |
| APOA4 337      | B2 |
| APOA5 116519   | B2 |



|                 |    |
|-----------------|----|
| APOBEC1 339     | B2 |
| APOBEC2 10930   | B2 |
| APOBEC3A 200315 | B2 |
| APOBEC3B 9582   | B2 |
| APOBEC3D 140564 | B2 |
| APOBEC3F 200316 | B2 |
| APOBEC3G 60489  | B2 |
| APOBEC3H 164668 | B2 |
| APOBEC4 403314  | B2 |
| APOC1P1 342     | B2 |
| APOC1 341       | B2 |
| APOC3 345       | B2 |
| APOC4 346       | B2 |
| APOD 347        | B2 |
| APOE 348        | B2 |
| APOF 319        | B2 |
| APOH 350        | B2 |
| APOL1 8542      | B2 |
| APOL2 23780     | B2 |
| APOL4 80832     | B2 |
| APOL5 80831     | B2 |
| APOL6 80830     | B2 |
| APOM 55937      | B2 |
| APOOL 139322    | B2 |
| APPBP2 10513    | B2 |
| APPL1 26060     | B2 |
| APP 351         | B2 |
| APRT 353        | B2 |
| AQP10 89872     | B2 |
| AQP11 282679    | B2 |
| AQP12A 375318   | B2 |
| AQP12B 653437   | B2 |
| AQP2 359        | B2 |
| AQP3 360        | B2 |
| AQP4 361        | B2 |
| AQP5 362        | B2 |
| AQP6 363        | B2 |
| AQP8 343        | B2 |
| AQP9 366        | B2 |
| AQR 9716        | B2 |
| ARAF 369        | B2 |
| ARAP2 116984    | B2 |
| ARCN1 372       | B2 |
| AREG 374        | B2 |
| ARFGAP2 84364   | B2 |
| ARFGAP3 26286   | B2 |
| ARFGEF2 10564   | B2 |
| ARFIP1 27236    | B2 |
| ARFRP1 10139    | B2 |
| ARG1 383        | B2 |
| ARGFXP2 503640  | B2 |

|                    |    |
|--------------------|----|
| ARGFX 503582       | B2 |
| ARHGAP12 94134     | B2 |
| ARHGAP15 55843     | B2 |
| ARHGAP18 93663     | B2 |
| ARHGAP1 392        | B2 |
| ARHGAP22 58504     | B2 |
| ARHGAP25 9938      | B2 |
| ARHGAP27 201176    | B2 |
| ARHGAP28 79822     | B2 |
| ARHGAP30 257106    | B2 |
| ARHGAP33 115703    | B2 |
| ARHGAP36 158763    | B2 |
| ARHGAP4 393        | B2 |
| ARHGAP8 23779      | B2 |
| ARHGAP9 64333      | B2 |
| ARHGDIA 396        | B2 |
| ARHGDIG 398        | B2 |
| ARHGEF10L 55160    | B2 |
| ARHGEF12 23365     | B2 |
| ARHGEF18 23370     | B2 |
| ARHGEF19 128272    | B2 |
| ARHGEF1 9138       | B2 |
| ARHGEF2 9181       | B2 |
| ARHGEF33 100271715 | B2 |
| ARHGEF35 445328    | B2 |
| ARHGEF38 54848     | B2 |
| ARHGEF3 50650      | B2 |
| ARHGEF4 50649      | B2 |
| ARHGEF5 7984       | B2 |
| ARHGEF9 23229      | B2 |
| ARID2 196528       | B2 |
| ARID3B 10620       | B2 |
| ARID3C 138715      | B2 |
| ARID4B 51742       | B2 |
| ARIH1 25820        | B2 |
| ARL13A 392509      | B2 |
| ARL13B 200894      | B2 |
| ARL14 80117        | B2 |
| ARL15 54622        | B2 |
| ARL16 339231       | B2 |
| ARL17A 51326       | B2 |
| ARL17B 641522      | B2 |
| ARL2BP 23568       | B2 |
| ARL4D 379          | B2 |
| ARL5A 26225        | B2 |
| ARL5B 221079       | B2 |
| ARL5C 390790       | B2 |
| ARL6IP4 51329      | B2 |
| ARL6IP5 10550      | B2 |
| ARL6IP6 151188     | B2 |
| ARL6 84100         | B2 |

|                |    |
|----------------|----|
| ARL9 132946    | B2 |
| ARMC2 84071    | B2 |
| ARMC3 219681   | B2 |
| ARMC4 55130    | B2 |
| ARMC5 79798    | B2 |
| ARMC8 25852    | B2 |
| ARMCX2 9823    | B2 |
| ARMCX3 51566   | B2 |
| ARMCX5 64860   | B2 |
| ARMCX6 54470   | B2 |
| ARMS2 387715   | B2 |
| ARNTL2 56938   | B2 |
| ARNTL 406      | B2 |
| ARNT 405       | B2 |
| ARPC1A 10552   | B2 |
| ARPM1 84517    | B2 |
| ARPP19 10776   | B2 |
| ARPP21 10777   | B2 |
| ARR3 407       | B2 |
| ARRB2 409      | B2 |
| ARRDC4 91947   | B2 |
| ARRDC5 645432  | B2 |
| ARSA 410       | B2 |
| ARSD 414       | B2 |
| ARSE 415       | B2 |
| ARSF 416       | B2 |
| ARSG 22901     | B2 |
| ARSH 347527    | B2 |
| ARSJ 79642     | B2 |
| ARSK 153642    | B2 |
| ART1 417       | B2 |
| ART3 419       | B2 |
| ART5 116969    | B2 |
| ARTN 9048      | B2 |
| ARVCF 421      | B2 |
| ARX 170302     | B2 |
| AR 367         | B2 |
| AS3MT 57412    | B2 |
| ASAH1 427      | B2 |
| ASAH2B 653308  | B2 |
| ASAH2 56624    | B2 |
| ASAPIIT1 29065 | B2 |
| ASAP1 50807    | B2 |
| ASAP2 8853     | B2 |
| ASAP3 55616    | B2 |
| ASB10 136371   | B2 |
| ASB11 140456   | B2 |
| ASB12 142689   | B2 |
| ASB14 142686   | B2 |
| ASB15 142685   | B2 |
| ASB16 92591    | B2 |

|                  |    |
|------------------|----|
| ASB17 127247     | B2 |
| ASB18 401036     | B2 |
| ASB2 51676       | B2 |
| ASB3 51130       | B2 |
| ASB4 51666       | B2 |
| ASB5 140458      | B2 |
| ASB6 140459      | B2 |
| ASB7 140460      | B2 |
| ASB8 140461      | B2 |
| ASB9 140462      | B2 |
| ASCC1 51008      | B2 |
| ASCC2 84164      | B2 |
| ASCC3 10973      | B2 |
| ASCL1 429        | B2 |
| ASCL2 430        | B2 |
| ASCL3 56676      | B2 |
| ASCL4 121549     | B2 |
| ASF1A 25842      | B2 |
| ASFMRI 100126270 | B2 |
| ASGR1 432        | B2 |
| ASGR2 433        | B2 |
| ASH1L 55870      | B2 |
| ASH2L 9070       | B2 |
| ASIP 434         | B2 |
| ASL 435          | B2 |
| ASMTL 8623       | B2 |
| ASMT 438         | B2 |
| ASNSD1 54529     | B2 |
| ASNS 440         | B2 |
| ASPDH 554235     | B2 |
| ASPG 374569      | B2 |
| ASPHD1 253982    | B2 |
| ASRGL1 80150     | B2 |
| ASS1 445         | B2 |
| ASTE1 28990      | B2 |
| ASTL 431705      | B2 |
| ASTN2 23245      | B2 |
| ASXL2 55252      | B2 |
| ASZ1 136991      | B2 |
| ATAD1 84896      | B2 |
| ATAD2B 54454     | B2 |
| ATAD3A 55210     | B2 |
| ATAD3B 83858     | B2 |
| ATAD3C 219293    | B2 |
| ATCAY 85300      | B2 |
| ATE1 11101       | B2 |
| ATF1 466         | B2 |
| ATF2 1386        | B2 |
| ATF4 468         | B2 |
| ATF7IP2 80063    | B2 |
| ATF7IP 55729     | B2 |

|                |    |
|----------------|----|
| ATG10 83734    | B2 |
| ATG12 9140     | B2 |
| ATG16L2 89849  | B2 |
| ATG2A 23130    | B2 |
| ATG3 64422     | B2 |
| ATG4A 115201   | B2 |
| ATG4B 23192    | B2 |
| ATG5 9474      | B2 |
| ATG7 10533     | B2 |
| ATG9A 79065    | B2 |
| ATHL1 80162    | B2 |
| ATL2 64225     | B2 |
| ATL3 25923     | B2 |
| ATMIN 23300    | B2 |
| ATOH7 220202   | B2 |
| ATP10A 57194   | B2 |
| ATP10B 23120   | B2 |
| ATP10D 57205   | B2 |
| ATP11A 23250   | B2 |
| ATP11B 23200   | B2 |
| ATP11C 286410  | B2 |
| ATP12A 479     | B2 |
| ATP13A3 79572  | B2 |
| ATP13A4 84239  | B2 |
| ATP13A5 344905 | B2 |
| ATP1A1 476     | B2 |
| ATP1A2 477     | B2 |
| ATP1A3 478     | B2 |
| ATP1A4 480     | B2 |
| ATP1B1 481     | B2 |
| ATP1B3 483     | B2 |
| ATP1B4 23439   | B2 |
| ATP2A1 487     | B2 |
| ATP2A2 488     | B2 |
| ATP2A3 489     | B2 |
| ATP2B1 490     | B2 |
| ATP2B2 491     | B2 |
| ATP2B3 492     | B2 |
| ATP2C1 27032   | B2 |
| ATP4A 495      | B2 |
| ATP4B 496      | B2 |
| ATP5A1 498     | B2 |
| ATP5B 506      | B2 |
| ATP5D 513      | B2 |
| ATP5EP2 432369 | B2 |
| ATP5E 514      | B2 |
| ATP5F1 515     | B2 |
| ATP5G1 516     | B2 |
| ATP5G2 517     | B2 |
| ATP5G3 518     | B2 |
| ATP5H 10476    | B2 |

|                 |    |
|-----------------|----|
| ATP5I 521       | B2 |
| ATP5J2 9551     | B2 |
| ATP5J 522       | B2 |
| ATP5L2 267020   | B2 |
| ATP5L 10632     | B2 |
| ATP5O 539       | B2 |
| ATP5SL 55101    | B2 |
| ATP5S 27109     | B2 |
| ATP6AP1L 92270  | B2 |
| ATP6V0A1 535    | B2 |
| ATP6V0A2 23545  | B2 |
| ATP6V0A4 50617  | B2 |
| ATP6V0D1 9114   | B2 |
| ATP6V0D2 245972 | B2 |
| ATP6V0E1 8992   | B2 |
| ATP6V0E2 155066 | B2 |
| ATP6V1B1 525    | B2 |
| ATP6V1B2 526    | B2 |
| ATP6V1C1 528    | B2 |
| ATP6V1C2 245973 | B2 |
| ATP6V1E1 529    | B2 |
| ATP6V1E2 90423  | B2 |
| ATP6V1G2 534    | B2 |
| ATP6V1G3 127124 | B2 |
| ATP6V1H 51606   | B2 |
| ATP7A 538       | B2 |
| ATP8A1 10396    | B2 |
| ATP8A2 51761    | B2 |
| ATP8B2 57198    | B2 |
| ATP8B3 148229   | B2 |
| ATP8B5P 158381  | B2 |
| ATP9A 10079     | B2 |
| ATP9B 374868    | B2 |
| ATPAF1 64756    | B2 |
| ATPAF2 91647    | B2 |
| ATPBD4 89978    | B2 |
| ATRNL1 26033    | B2 |
| ATRN 8455       | B2 |
| ATRX 546        | B2 |
| ATR 545         | B2 |
| ATXN10 25814    | B2 |
| ATXN1 6310      | B2 |
| ATXN2 6311      | B2 |
| ATXN3L 92552    | B2 |
| ATXN7L1 222255  | B2 |
| ATXN7L2 127002  | B2 |
| ATXN7L3B 552889 | B2 |
| ATXN7 6314      | B2 |
| ATXN8OS 6315    | B2 |
| AURKAIP1 54998  | B2 |
| AURKC 6795      | B2 |

|                 |    |
|-----------------|----|
| AUTS2 26053     | B2 |
| AVEN 57099      | B2 |
| AVIL 10677      | B2 |
| AVPR1B 553      | B2 |
| AVP 551         | B2 |
| AWAT1 158833    | B2 |
| AWAT2 158835    | B2 |
| AZGP1 563       | B2 |
| AZI1 22994      | B2 |
| AZIN1 51582     | B2 |
| AZU1 566        | B2 |
| B2M 567         | B2 |
| B3GALT4 8705    | B2 |
| B3GALT5 10317   | B2 |
| B3GALT6 126792  | B2 |
| B3GALTL 145173  | B2 |
| B3GAT1 27087    | B2 |
| B3GAT2 135152   | B2 |
| B3GNT2 10678    | B2 |
| B3GNT3 10331    | B2 |
| B3GNT5 84002    | B2 |
| B3GNT6 192134   | B2 |
| B3GNT7 93010    | B2 |
| B3GNT8 374907   | B2 |
| B3GNT9 84752    | B2 |
| B3GNTL1 146712  | B2 |
| B4GALNT1 2583   | B2 |
| B4GALNT2 124872 | B2 |
| B4GALT2 8704    | B2 |
| B4GALT5 9334    | B2 |
| B4GALT7 11285   | B2 |
| B9D1 27077      | B2 |
| B9D2 80776      | B2 |
| BAALC 79870     | B2 |
| BAAT 570        | B2 |
| BACE2 25825     | B2 |
| BACH1 571       | B2 |
| BAD 572         | B2 |
| BAG1 573        | B2 |
| BAG2 9532       | B2 |
| BAG3 9531       | B2 |
| BAG4 9530       | B2 |
| BAG5 9529       | B2 |
| BAGE2 85319     | B2 |
| BAGE 574        | B2 |
| BAHCC1 57597    | B2 |
| BAHD1 22893     | B2 |
| BAI 575         | B2 |
| BAIAP2L2 80115  | B2 |
| BAIAP3 8938     | B2 |
| BAMBI 25805     | B2 |

|                |    |
|----------------|----|
| BANF2 140836   | B2 |
| BANK1 55024    | B2 |
| BANP 54971     | B2 |
| BAP1 8314      | B2 |
| BARHL1 56751   | B2 |
| BARHL2 343472  | B2 |
| BARX1 56033    | B2 |
| BARX2 8538     | B2 |
| BASE 317716    | B2 |
| BAT1 7919      | B2 |
| BAT2L1 84726   | B2 |
| BAT2 7916      | B2 |
| BAT3 7917      | B2 |
| BAT4 7918      | B2 |
| BATF2 116071   | B2 |
| BATF3 55509    | B2 |
| BATF 10538     | B2 |
| BAZ1B 9031     | B2 |
| BAZ2A 11176    | B2 |
| BBS1 582       | B2 |
| BBS4 585       | B2 |
| BBS5 129880    | B2 |
| BBS9 27241     | B2 |
| BBX 56987      | B2 |
| BCAM 4059      | B2 |
| BCAN 63827     | B2 |
| BCAP29 55973   | B2 |
| BCAP31 10134   | B2 |
| BCAR1 9564     | B2 |
| BCAR3 8412     | B2 |
| BCAR4 400500   | B2 |
| BCAS1 8537     | B2 |
| BCAS2 10286    | B2 |
| BCAS3 54828    | B2 |
| BCAS4 55653    | B2 |
| BCAT1 586      | B2 |
| BCAT2 587      | B2 |
| BCCIP 56647    | B2 |
| BCDIN3D 144233 | B2 |
| BCKDHA 593     | B2 |
| BCKDHB 594     | B2 |
| BCL10 8915     | B2 |
| BCL11A 53335   | B2 |
| BCL11B 64919   | B2 |
| BCL2A1 597     | B2 |
| BCL2L10 10017  | B2 |
| BCL2L11 10018  | B2 |
| BCL2L13 23786  | B2 |
| BCL2L14 79370  | B2 |
| BCL2L15 440603 | B2 |
| BCL2 596       | B2 |



|                 |    |
|-----------------|----|
| BCL6B 255877    | B2 |
| BCL7A 605       | B2 |
| BCL7B 9275      | B2 |
| BCL7C 9274      | B2 |
| BCL8 606        | B2 |
| BCL9L 283149    | B2 |
| BCLAF1 9774     | B2 |
| BCMO1 53630     | B2 |
| BCO2 83875      | B2 |
| BCORL1 63035    | B2 |
| BCR 613         | B2 |
| BCS1L 617       | B2 |
| BCYRN1 618      | B2 |
| BDH1 622        | B2 |
| BDKRB1 623      | B2 |
| BDKRB2 624      | B2 |
| BDNF 627        | B2 |
| BDP1 55814      | B2 |
| BEAN 146227     | B2 |
| BECN1 8678      | B2 |
| BEND2 139105    | B2 |
| BEND4 389206    | B2 |
| BEST2 54831     | B2 |
| BEST3 144453    | B2 |
| BEST4 266675    | B2 |
| BET1L 51272     | B2 |
| BET1 10282      | B2 |
| BET3L 100128327 | B2 |
| BEX1 55859      | B2 |
| BEX2 84707      | B2 |
| BEX4 56271      | B2 |
| BEX5 340542     | B2 |
| BEYLA 497634    | B2 |
| BFSP1 631       | B2 |
| BFSP2 8419      | B2 |
| BGLAP 632       | B2 |
| BHLHA15 168620  | B2 |
| BHLHB9 80823    | B2 |
| BHLHE22 27319   | B2 |
| BHLHE40 8553    | B2 |
| BHMT 635        | B2 |
| BICC1 80114     | B2 |
| BICD1 636       | B2 |
| BID 637         | B2 |
| BIN1 274        | B2 |
| BIN2 51411      | B2 |
| BIRC2 329       | B2 |
| BIRC3 330       | B2 |
| BIRC6 57448     | B2 |
| BIRC7 79444     | B2 |
| BIRC8 112401    | B2 |

|               |    |
|---------------|----|
| BLID 414899   | B2 |
| BLK 640       | B2 |
| BLMH 642      | B2 |
| BLM 641       | B2 |
| BLOC1S1 2647  | B2 |
| BLVRA 644     | B2 |
| BLVRB 645     | B2 |
| BMF 90427     | B2 |
| BMP10 27302   | B2 |
| BMP15 9210    | B2 |
| BMP1 649      | B2 |
| BMP2K 55589   | B2 |
| BMP3 651      | B2 |
| BMP4 652      | B2 |
| BMP7 655      | B2 |
| BMP8B 656     | B2 |
| BMPR1B 658    | B2 |
| BMPR2 659     | B2 |
| BMS1P4 729096 | B2 |
| BMS1 9790     | B2 |
| BNC1 646      | B2 |
| BNC2 54796    | B2 |
| BNIP3 664     | B2 |
| BNIPL 149428  | B2 |
| BOD1 91272    | B2 |
| BOLL 66037    | B2 |
| BPESC1 60467  | B2 |
| BPGM 669      | B2 |
| BPHL 670      | B2 |
| BPIL1 80341   | B2 |
| BPIL2 254240  | B2 |
| BPIL3 128859  | B2 |
| BPI 671       | B2 |
| BPTF 2186     | B2 |
| BRAF 673      | B2 |
| BRAP 8315     | B2 |
| BRD1 23774    | B2 |
| BRD2 6046     | B2 |
| BRD3 8019     | B2 |
| BRD4 23476    | B2 |
| BRD7P3 23629  | B2 |
| BRD7 29117    | B2 |
| BRD8 10902    | B2 |
| BRD9 65980    | B2 |
| BRDT 676      | B2 |
| BREA2 286076  | B2 |
| BRE 9577      | B2 |
| BRF1 2972     | B2 |
| BRF2 55290    | B2 |
| BRI3 25798    | B2 |
| BRP44L 51660  | B2 |

|                  |    |
|------------------|----|
| BRP44 25874      | B2 |
| BRPF1 7862       | B2 |
| BRPF3 27154      | B2 |
| BRS3 680         | B2 |
| BRSK1 84446      | B2 |
| BRSK2 9024       | B2 |
| BRWD1 54014      | B2 |
| BSDC1 55108      | B2 |
| BSG 682          | B2 |
| BSND 7809        | B2 |
| BSN 8927         | B2 |
| BTBD16 118663    | B2 |
| BTBD17 388419    | B2 |
| BTBD18 643376    | B2 |
| BTBD19 149478    | B2 |
| BTBD1 53339      | B2 |
| BTBD2 55643      | B2 |
| BTBD3 22903      | B2 |
| BTBD6 90135      | B2 |
| BTBD9 114781     | B2 |
| BTC 685          | B2 |
| BTD 686          | B2 |
| BTF3L1 690       | B2 |
| BTF3 689         | B2 |
| BTG1 694         | B2 |
| BTG2 7832        | B2 |
| BTG3 10950       | B2 |
| BTG4 54766       | B2 |
| BTK 695          | B2 |
| BTLA 151888      | B2 |
| BTN1A1 696       | B2 |
| BTN2A2 10385     | B2 |
| BTN3A1 11119     | B2 |
| BTN3A2 11118     | B2 |
| BTN3A3 10384     | B2 |
| BTNL2 56244      | B2 |
| BTNL3 10917      | B2 |
| BTNL8 79908      | B2 |
| BTRC 8945        | B2 |
| BVES 11149       | B2 |
| C10orf107 219621 | B2 |
| C10orf110 55853  | B2 |
| C10orf111 221060 | B2 |
| C10orf113 387638 | B2 |
| C10orf114 399726 | B2 |
| C10orf118 55088  | B2 |
| C10orf119 79892  | B2 |
| C10orf122 387718 | B2 |
| C10orf125 282969 | B2 |
| C10orf129 142827 | B2 |
| C10orf12 26148   | B2 |

|                     |    |
|---------------------|----|
| C10orf131 100127889 | B2 |
| C10orf137 26098     | B2 |
| C10orf140 387640    | B2 |
| C10orf26 54838      | B2 |
| C10orf27 219793     | B2 |
| C10orf28 27291      | B2 |
| C10orf2 56652       | B2 |
| C10orf32 119032     | B2 |
| C10orf40 283025     | B2 |
| C10orf41 100131213  | B2 |
| C10orf47 254427     | B2 |
| C10orf55 414236     | B2 |
| C10orf62 414157     | B2 |
| C10orf67 256815     | B2 |
| C10orf68 79741      | B2 |
| C10orf71 118461     | B2 |
| C10orf75 90271      | B2 |
| C10orf76 79591      | B2 |
| C10orf78 119392     | B2 |
| C10orf79 80217      | B2 |
| C10orf81 79949      | B2 |
| C10orf82 143379     | B2 |
| C10orf84 63877      | B2 |
| C10orf88 80007      | B2 |
| C10orf91 170393     | B2 |
| C10orf93 255352     | B2 |
| C10orf96 374355     | B2 |
| C10orf99 387695     | B2 |
| C11orf16 56673      | B2 |
| C11orf17 56672      | B2 |
| C11orf1 64776       | B2 |
| C11orf20 25858      | B2 |
| C11orf21 29125      | B2 |
| C11orf30 56946      | B2 |
| C11orf34 349633     | B2 |
| C11orf35 256329     | B2 |
| C11orf41 25758      | B2 |
| C11orf42 160298     | B2 |
| C11orf45 219833     | B2 |
| C11orf46 120534     | B2 |
| C11orf51 25906      | B2 |
| C11orf52 91894      | B2 |
| C11orf54 28970      | B2 |
| C11orf57 55216      | B2 |
| C11orf58 10944      | B2 |
| C11orf59 55004      | B2 |
| C11orf65 160140     | B2 |
| C11orf67 28971      | B2 |
| C11orf68 83638      | B2 |
| C11orf70 85016      | B2 |
| C11orf71 54494      | B2 |

|                 |    |
|-----------------|----|
| C11orf73 51501  | B2 |
| C11orf74 119710 | B2 |
| C11orf75 56935  | B2 |
| C11orf80 79703  | B2 |
| C11orf85 283129 | B2 |
| C11orf86 254439 | B2 |
| C11orf87 399947 | B2 |
| C11orf88 399949 | B2 |
| C11orf90 387804 | B2 |
| C11orf92 399948 | B2 |
| C11orf94 143678 | B2 |
| C11orf9 745     | B2 |
| C12orf10 60314  | B2 |
| C12orf24 29902  | B2 |
| C12orf27 283460 | B2 |
| C12orf29 91298  | B2 |
| C12orf35 55196  | B2 |
| C12orf36 283422 | B2 |
| C12orf39 80763  | B2 |
| C12orf40 283461 | B2 |
| C12orf41 54934  | B2 |
| C12orf42 374470 | B2 |
| C12orf45 121053 | B2 |
| C12orf47 51275  | B2 |
| C12orf49 79794  | B2 |
| C12orf4 57102   | B2 |
| C12orf50 160419 | B2 |
| C12orf51 283450 | B2 |
| C12orf53 196500 | B2 |
| C12orf54 121273 | B2 |
| C12orf56 115749 | B2 |
| C12orf57 113246 | B2 |
| C12orf5 57103   | B2 |
| C12orf60 144608 | B2 |
| C12orf61 283416 | B2 |
| C12orf62 84987  | B2 |
| C12orf63 374467 | B2 |
| C12orf65 91574  | B2 |
| C12orf69 440087 | B2 |
| C12orf71 728858 | B2 |
| C12orf72 254013 | B2 |
| C12orf73 728568 | B2 |
| C12orf74 338809 | B2 |
| C12orf75 387882 | B2 |
| C12orf76 400073 | B2 |
| C12orf77 196415 | B2 |
| C13orf16 121793 | B2 |
| C13orf18 80183  | B2 |
| C13orf1 57213   | B2 |
| C13orf23 80209  | B2 |
| C13orf26 122046 | B2 |

|                    |    |
|--------------------|----|
| C13orf27 93081     | B2 |
| C13orf29 283487    | B2 |
| C13orf30 144809    | B2 |
| C13orf31 144811    | B2 |
| C13orf35 400165    | B2 |
| C13orf38 728591    | B2 |
| C13orf39 196541    | B2 |
| C14orf101 54916    | B2 |
| C14orf102 55051    | B2 |
| C14orf104 55172    | B2 |
| C14orf105 55195    | B2 |
| C14orf106 55320    | B2 |
| C14orf109 26175    | B2 |
| C14orf115 55237    | B2 |
| C14orf126 112487   | B2 |
| C14orf135 64430    | B2 |
| C14orf138 79609    | B2 |
| C14orf145 145508   | B2 |
| C14orf147 171546   | B2 |
| C14orf148 122945   | B2 |
| C14orf153 84334    | B2 |
| C14orf162 56936    | B2 |
| C14orf165 414767   | B2 |
| C14orf166B 145497  | B2 |
| C14orf166 51637    | B2 |
| C14orf167 55449    | B2 |
| C14orf176 643382   | B2 |
| C14orf178 283579   | B2 |
| C14orf179 112752   | B2 |
| C14orf181 400223   | B2 |
| C14orf182 283551   | B2 |
| C14orf183 196913   | B2 |
| C14orf184 650662   | B2 |
| C14orf19 280655    | B2 |
| C14orf21 161424    | B2 |
| C14orf23 387978    | B2 |
| C14orf2 9556       | B2 |
| C14orf33 100129075 | B2 |
| C14orf34 645687    | B2 |
| C14orf37 145407    | B2 |
| C14orf39 317761    | B2 |
| C14orf43 91748     | B2 |
| C14orf45 80127     | B2 |
| C14orf48 256369    | B2 |
| C14orf4 64207      | B2 |
| C14orf50 145376    | B2 |
| C14orf53 440184    | B2 |
| C14orf68 283600    | B2 |
| C14orf72 145200    | B2 |
| C14orf73 91828     | B2 |
| C14orf79 122616    | B2 |

|                 |    |
|-----------------|----|
| C14orf86 283592 | B2 |
| C14orf93 60686  | B2 |
| C15orf24 56851  | B2 |
| C15orf26 161502 | B2 |
| C15orf27 123591 | B2 |
| C15orf28 80035  | B2 |
| C15orf2 23742   | B2 |
| C15orf33 196951 | B2 |
| C15orf34 80072  | B2 |
| C15orf37 283687 | B2 |
| C15orf38 348110 | B2 |
| C15orf39 56905  | B2 |
| C15orf41 84529  | B2 |
| C15orf43 145645 | B2 |
| C15orf44 81556  | B2 |
| C15orf48 84419  | B2 |
| C15orf50 414926 | B2 |
| C15orf53 400359 | B2 |
| C15orf55 256646 | B2 |
| C15orf56 644809 | B2 |
| C15orf57 90416  | B2 |
| C15orf58 390637 | B2 |
| C15orf59 388135 | B2 |
| C15orf5 81698   | B2 |
| C15orf60 283677 | B2 |
| C15orf61 145853 | B2 |
| C15orf62 643338 | B2 |
| C16orf11 146325 | B2 |
| C16orf3 750     | B2 |
| C16orf42 115939 | B2 |
| C16orf45 89927  | B2 |
| C16orf46 123775 | B2 |
| C16orf48 84080  | B2 |
| C16orf52 730094 | B2 |
| C16orf54 283897 | B2 |
| C16orf57 79650  | B2 |
| C16orf62 57020  | B2 |
| C16orf63 123811 | B2 |
| C16orf68 79091  | B2 |
| C16orf73 254528 | B2 |
| C16orf74 404550 | B2 |
| C16orf78 123970 | B2 |
| C16orf79 283870 | B2 |
| C16orf7 9605    | B2 |
| C16orf80 29105  | B2 |
| C16orf81 283860 | B2 |
| C16orf82 162083 | B2 |
| C16orf87 388272 | B2 |
| C16orf89 146556 | B2 |
| C16orf90 646174 | B2 |
| C16orf92 146378 | B2 |

|                     |    |
|---------------------|----|
| C17orf101 79701     | B2 |
| C17orf102 400591    | B2 |
| C17orf104 284071    | B2 |
| C17orf105 284067    | B2 |
| C17orf106 100134934 | B2 |
| C17orf37 84299      | B2 |
| C17orf42 79736      | B2 |
| C17orf44 284029     | B2 |
| C17orf46 124783     | B2 |
| C17orf47 284083     | B2 |
| C17orf49 124944     | B2 |
| C17orf50 146853     | B2 |
| C17orf53 78995      | B2 |
| C17orf54 283982     | B2 |
| C17orf55 284185     | B2 |
| C17orf56 146705     | B2 |
| C17orf58 284018     | B2 |
| C17orf59 54785      | B2 |
| C17orf60 284021     | B2 |
| C17orf61 254863     | B2 |
| C17orf63 55731      | B2 |
| C17orf64 124773     | B2 |
| C17orf66 256957     | B2 |
| C17orf67 339210     | B2 |
| C17orf68 80169      | B2 |
| C17orf71 55181      | B2 |
| C17orf72 92340      | B2 |
| C17orf73 55018      | B2 |
| C17orf74 201243     | B2 |
| C17orf75 64149      | B2 |
| C17orf76 388341     | B2 |
| C17orf77 146723     | B2 |
| C17orf78 284099     | B2 |
| C17orf79 55352      | B2 |
| C17orf80 55028      | B2 |
| C17orf82 388407     | B2 |
| C17orf86 654434     | B2 |
| C17orf87 388325     | B2 |
| C17orf88 23591      | B2 |
| C17orf89 284184     | B2 |
| C17orf93 360205     | B2 |
| C17orf95 124512     | B2 |
| C17orf96 100170841  | B2 |
| C17orf97 400566     | B2 |
| C17orf98 388381     | B2 |
| C17orf99 100141515  | B2 |
| C18orf10 25941      | B2 |
| C18orf16 147429     | B2 |
| C18orf19 125228     | B2 |
| C18orf1 753         | B2 |
| C18orf20 221241     | B2 |



|                    |    |
|--------------------|----|
| C18orf21 83608     | B2 |
| C18orf22 79863     | B2 |
| C18orf25 147339    | B2 |
| C18orf26 284254    | B2 |
| C18orf2 56651      | B2 |
| C18orf54 162681    | B2 |
| C18orf55 29090     | B2 |
| C18orf62 284274    | B2 |
| C18orf8 29919      | B2 |
| C19orf18 147685    | B2 |
| C19orf20 91978     | B2 |
| C19orf23 148046    | B2 |
| C19orf25 148223    | B2 |
| C19orf26 255057    | B2 |
| C19orf29 58509     | B2 |
| C19orf2 8725       | B2 |
| C19orf30 284424    | B2 |
| C19orf33 64073     | B2 |
| C19orf34 255193    | B2 |
| C19orf35 374872    | B2 |
| C19orf36 113177    | B2 |
| C19orf38 255809    | B2 |
| C19orf41 126123    | B2 |
| C19orf42 79086     | B2 |
| C19orf43 79002     | B2 |
| C19orf44 84167     | B2 |
| C19orf47 126526    | B2 |
| C19orf50 79036     | B2 |
| C19orf54 284325    | B2 |
| C19orf55 148137    | B2 |
| C19orf56 51398     | B2 |
| C19orf57 79173     | B2 |
| C19orf59 199675    | B2 |
| C19orf60 55049     | B2 |
| C19orf62 29086     | B2 |
| C19orf66 55337     | B2 |
| C19orf6 91304      | B2 |
| C19orf70 125988    | B2 |
| C19orf71 100128569 | B2 |
| C19orf73 55150     | B2 |
| C19orf75 284369    | B2 |
| C19orf77 284422    | B2 |
| C1D 10438          | B2 |
| C1GALT1 56913      | B2 |
| C1QA 712           | B2 |
| C1QBP 708          | B2 |
| C1QB 713           | B2 |
| C1QC 714           | B2 |
| C1QL1 10882        | B2 |
| C1QL3 389941       | B2 |
| C1QL4 338761       | B2 |

|                 |    |
|-----------------|----|
| C1QTNF3 114899  | B2 |
| C1QTNF4 114900  | B2 |
| C1QTNF8 390664  | B2 |
| C1orf100 200159 | B2 |
| C1orf101 257044 | B2 |
| C1orf104 284618 | B2 |
| C1orf105 92346  | B2 |
| C1orf106 55765  | B2 |
| C1orf107 27042  | B2 |
| C1orf109 54955  | B2 |
| C1orf110 339512 | B2 |
| C1orf111 284680 | B2 |
| C1orf113 79729  | B2 |
| C1orf114 57821  | B2 |
| C1orf116 79098  | B2 |
| C1orf125 126859 | B2 |
| C1orf126 200197 | B2 |
| C1orf127 148345 | B2 |
| C1orf128 57095  | B2 |
| C1orf129 80133  | B2 |
| C1orf133 574036 | B2 |
| C1orf141 400757 | B2 |
| C1orf144 26099  | B2 |
| C1orf14 81626   | B2 |
| C1orf150 148823 | B2 |
| C1orf151 440574 | B2 |
| C1orf152 767846 | B2 |
| C1orf157 284573 | B2 |
| C1orf158 93190  | B2 |
| C1orf159 54991  | B2 |
| C1orf161 126868 | B2 |
| C1orf162 128346 | B2 |
| C1orf163 65260  | B2 |
| C1orf168 199920 | B2 |
| C1orf170 84808  | B2 |
| C1orf172 126695 | B2 |
| C1orf173 127254 | B2 |
| C1orf174 339448 | B2 |
| C1orf177 163747 | B2 |
| C1orf180 439927 | B2 |
| C1orf185 284546 | B2 |
| C1orf186 440712 | B2 |
| C1orf187 374946 | B2 |
| C1orf189 388701 | B2 |
| C1orf192 257177 | B2 |
| C1orf194 127003 | B2 |
| C1orf198 84886  | B2 |
| C1orf200 644997 | B2 |
| C1orf201 90529  | B2 |
| C1orf203 84852  | B2 |
| C1orf204 284677 | B2 |

|                   |    |
|-------------------|----|
| C1orf210 149466   | B2 |
| C1orf212 113444   | B2 |
| C1orf216 127703   | B2 |
| C1orf21 81563     | B2 |
| C1orf223 374973   | B2 |
| C1orf226 400793   | B2 |
| C1orf227 149643   | B2 |
| C1orf228 339541   | B2 |
| C1orf229 388759   | B2 |
| C1orf230 284485   | B2 |
| C1orf25 81627     | B2 |
| C1orf26 54823     | B2 |
| C1orf38 9473      | B2 |
| C1orf49 84066     | B2 |
| C1orf50 79078     | B2 |
| C1orf51 148523    | B2 |
| C1orf54 79630     | B2 |
| C1orf55 163859    | B2 |
| C1orf59 113802    | B2 |
| C1orf61 10485     | B2 |
| C1orf63 57035     | B2 |
| C1orf64 149563    | B2 |
| C1orf65 164127    | B2 |
| C1orf66 51093     | B2 |
| C1orf68 100129271 | B2 |
| C1orf69 200205    | B2 |
| C1orf70 339453    | B2 |
| C1orf83 127428    | B2 |
| C1orf84 149469    | B2 |
| C1orf86 199990    | B2 |
| C1orf87 127795    | B2 |
| C1orf88 128344    | B2 |
| C1orf89 79363     | B2 |
| C1orf91 56063     | B2 |
| C1orf92 149499    | B2 |
| C1orf94 84970     | B2 |
| C1orf95 375057    | B2 |
| C1orf96 126731    | B2 |
| C20orf106 200232  | B2 |
| C20orf107 388799  | B2 |
| C20orf108 116151  | B2 |
| C20orf111 51526   | B2 |
| C20orf114 92747   | B2 |
| C20orf117 140710  | B2 |
| C20orf118 140711  | B2 |
| C20orf11 54994    | B2 |
| C20orf123 128506  | B2 |
| C20orf12 55184    | B2 |
| C20orf134 170487  | B2 |
| C20orf135 140701  | B2 |
| C20orf141 128653  | B2 |

|                  |    |
|------------------|----|
| C20orf144 128864 | B2 |
| C20orf152 140894 | B2 |
| C20orf166 128826 | B2 |
| C20orf173 140873 | B2 |
| C20orf177 63939  | B2 |
| C20orf186 149954 | B2 |
| C20orf191 149934 | B2 |
| C20orf195 79025  | B2 |
| C20orf196 149840 | B2 |
| C20orf197 284756 | B2 |
| C20orf199 441951 | B2 |
| C20orf200 253868 | B2 |
| C20orf201 198437 | B2 |
| C20orf202 400831 | B2 |
| C20orf26 26074   | B2 |
| C20orf27 54976   | B2 |
| C20orf29 55317   | B2 |
| C20orf30 29058   | B2 |
| C20orf3 57136    | B2 |
| C20orf43 51507   | B2 |
| C20orf46 55321   | B2 |
| C20orf4 25980    | B2 |
| C20orf56 140828  | B2 |
| C20orf70 140683  | B2 |
| C20orf72 92667   | B2 |
| C20orf7 79133    | B2 |
| C20orf85 128602  | B2 |
| C20orf96 140680  | B2 |
| C21orf119 84996  | B2 |
| C21orf121 150142 | B2 |
| C21orf122 728039 | B2 |
| C21orf125 284836 | B2 |
| C21orf128 150147 | B2 |
| C21orf129 150135 | B2 |
| C21orf130 284835 | B2 |
| C21orf15 54094   | B2 |
| C21orf29 54084   | B2 |
| C21orf33 8209    | B2 |
| C21orf56 84221   | B2 |
| C21orf57 54059   | B2 |
| C21orf67 84536   | B2 |
| C21orf70 85395   | B2 |
| C21orf71 282566  | B2 |
| C21orf7 56911    | B2 |
| C21orf81 391267  | B2 |
| C21orf82 114036  | B2 |
| C21orf84 114038  | B2 |
| C21orf88 114041  | B2 |
| C21orf90 114043  | B2 |
| C21orf91 54149   | B2 |
| C21orf96 80215   | B2 |

|                   |    |
|-------------------|----|
| C21orf99 149992   | B2 |
| C22orf13 83606    | B2 |
| C22orf15 150248   | B2 |
| C22orf24 25775    | B2 |
| C22orf25 128989   | B2 |
| C22orf26 55267    | B2 |
| C22orf27 150291   | B2 |
| C22orf28 51493    | B2 |
| C22orf29 79680    | B2 |
| C22orf30 253143   | B2 |
| C22orf31 25770    | B2 |
| C22orf32 91689    | B2 |
| C22orf34 348645   | B2 |
| C22orf36 388886   | B2 |
| C22orf40 150383   | B2 |
| C22orf41 644186   | B2 |
| C22orf43 51233    | B2 |
| C22orf45 646023   | B2 |
| C22orf9 23313     | B2 |
| C2CD3 26005       | B2 |
| C2CD4A 145741     | B2 |
| C2CD4B 388125     | B2 |
| C2CD4D 100191040  | B2 |
| C2orf14 100132708 | B2 |
| C2orf16 84226     | B2 |
| C2orf24 27013     | B2 |
| C2orf27A 29798    | B2 |
| C2orf27B 408029   | B2 |
| C2orf28 51374     | B2 |
| C2orf34 79823     | B2 |
| C2orf39 92749     | B2 |
| C2orf3 6936       | B2 |
| C2orf42 54980     | B2 |
| C2orf43 60526     | B2 |
| C2orf44 80304     | B2 |
| C2orf47 79568     | B2 |
| C2orf49 79074     | B2 |
| C2orf50 130813    | B2 |
| C2orf51 200523    | B2 |
| C2orf52 151477    | B2 |
| C2orf53 339779    | B2 |
| C2orf54 79919     | B2 |
| C2orf55 343990    | B2 |
| C2orf56 55471     | B2 |
| C2orf57 165100    | B2 |
| C2orf60 129450    | B2 |
| C2orf61 285051    | B2 |
| C2orf62 375307    | B2 |
| C2orf63 130162    | B2 |
| C2orf64 493753    | B2 |
| C2orf65 130951    | B2 |

|                |    |
|----------------|----|
| C2orf66 401027 | B2 |
| C2orf68 388969 | B2 |
| C2orf69 205327 | B2 |
| C2orf70 339778 | B2 |
| C2orf72 257407 | B2 |
| C2orf73 129852 | B2 |
| C2orf76 130355 | B2 |
| C2orf77 129881 | B2 |
| C2orf78 388960 | B2 |
| C2orf79 391356 | B2 |
| C2orf7 84279   | B2 |
| C2orf80 389073 | B2 |
| C2orf81 388963 | B2 |
| C2orf82 389084 | B2 |
| C2orf83 56918  | B2 |
| C2orf85 285093 | B2 |
| C2orf89 129293 | B2 |
| C2 717         | B2 |
| C3AR1 719      | B2 |
| C3orf10 55845  | B2 |
| C3orf15 89876  | B2 |
| C3orf16 389161 | B2 |
| C3orf17 25871  | B2 |
| C3orf19 51244  | B2 |
| C3orf1 51300   | B2 |
| C3orf20 84077  | B2 |
| C3orf22 152065 | B2 |
| C3orf23 285343 | B2 |
| C3orf24 115795 | B2 |
| C3orf26 84319  | B2 |
| C3orf27 23434  | B2 |
| C3orf30 152405 | B2 |
| C3orf31 132001 | B2 |
| C3orf32 51066  | B2 |
| C3orf33 285315 | B2 |
| C3orf34 84984  | B2 |
| C3orf35 339883 | B2 |
| C3orf37 56941  | B2 |
| C3orf39 84892  | B2 |
| C3orf43 255798 | B2 |
| C3orf45 132228 | B2 |
| C3orf48 151649 | B2 |
| C3orf49 132200 | B2 |
| C3orf51 711    | B2 |
| C3orf57 165679 | B2 |
| C3orf59 151963 | B2 |
| C3orf62 375341 | B2 |
| C3orf63 23272  | B2 |
| C3orf65 646600 | B2 |
| C3orf66 677779 | B2 |
| C3orf70 285382 | B2 |

|                   |    |
|-------------------|----|
| C3orf71 646450    | B2 |
| C3orf72 401089    | B2 |
| C3orf74 100128378 | B2 |
| C3orf75 54859     | B2 |
| C3orf79 152118    | B2 |
| C4BPA 722         | B2 |
| C4BPB 725         | B2 |
| C4orf10 317648    | B2 |
| C4orf14 84273     | B2 |
| C4orf17 84103     | B2 |
| C4orf19 55286     | B2 |
| C4orf21 55345     | B2 |
| C4orf22 255119    | B2 |
| C4orf26 152816    | B2 |
| C4orf27 54969     | B2 |
| C4orf29 80167     | B2 |
| C4orf31 79625     | B2 |
| C4orf32 132720    | B2 |
| C4orf33 132321    | B2 |
| C4orf35 85438     | B2 |
| C4orf36 132989    | B2 |
| C4orf37 285555    | B2 |
| C4orf39 152756    | B2 |
| C4orf40 401137    | B2 |
| C4orf41 60684     | B2 |
| C4orf43 55319     | B2 |
| C4orf44 345222    | B2 |
| C4orf45 152940    | B2 |
| C4orf47 441054    | B2 |
| C4orf50 389197    | B2 |
| C4orf51 646603    | B2 |
| C4orf6 10141      | B2 |
| C4orf7 260436     | B2 |
| C5AR1 728         | B2 |
| C5orf20 140947    | B2 |
| C5orf23 79614     | B2 |
| C5orf24 134553    | B2 |
| C5orf25 375484    | B2 |
| C5orf27 202299    | B2 |
| C5orf28 64417     | B2 |
| C5orf33 133686    | B2 |
| C5orf35 133383    | B2 |
| C5orf36 285600    | B2 |
| C5orf38 153571    | B2 |
| C5orf39 389289    | B2 |
| C5orf40 408263    | B2 |
| C5orf42 65250     | B2 |
| C5orf44 80006     | B2 |
| C5orf46 389336    | B2 |
| C5orf47 133491    | B2 |
| C5orf48 389320    | B2 |

|                    |    |
|--------------------|----|
| C5orf51 285636     | B2 |
| C5orf52 100190949  | B2 |
| C5orf54 63920      | B2 |
| C5orf55 116349     | B2 |
| C5orf58 133874     | B2 |
| C5orf60 285679     | B2 |
| C5 727             | B2 |
| C6orf103 79747     | B2 |
| C6orf106 64771     | B2 |
| C6orf108 10591     | B2 |
| C6orf10 10665      | B2 |
| C6orf114 85411     | B2 |
| C6orf118 168090    | B2 |
| C6orf124 653483    | B2 |
| C6orf130 221443    | B2 |
| C6orf132 647024    | B2 |
| C6orf134 79969     | B2 |
| C6orf136 221545    | B2 |
| C6orf138 442213    | B2 |
| C6orf141 135398    | B2 |
| C6orf142 90523     | B2 |
| C6orf146 222826    | B2 |
| C6orf147 387097    | B2 |
| C6orf155 79940     | B2 |
| C6orf15 29113      | B2 |
| C6orf165 154313    | B2 |
| C6orf167 253714    | B2 |
| C6orf168 84553     | B2 |
| C6orf170 221322    | B2 |
| C6orf176 90632     | B2 |
| C6orf182 285753    | B2 |
| C6orf186 728464    | B2 |
| C6orf192 116843    | B2 |
| C6orf195 154386    | B2 |
| C6orf203 51250     | B2 |
| C6orf208 80069     | B2 |
| C6orf211 79624     | B2 |
| C6orf217 100131814 | B2 |
| C6orf218 221718    | B2 |
| C6orf221 154288    | B2 |
| C6orf222 389384    | B2 |
| C6orf223 221416    | B2 |
| C6orf225 619208    | B2 |
| C6orf226 441150    | B2 |
| C6orf227 401253    | B2 |
| C6orf25 80739      | B2 |
| C6orf26 401251     | B2 |
| C6orf27 80737      | B2 |
| C6orf41 100133205  | B2 |
| C6orf47 57827      | B2 |
| C6orf48 50854      | B2 |



|                   |    |
|-------------------|----|
| C6orf52 347744    | B2 |
| C6orf58 352999    | B2 |
| C6orf70 55780     | B2 |
| C6orf81 221481    | B2 |
| C6orf94 153918    | B2 |
| C6orf97 80129     | B2 |
| C6 729            | B2 |
| C7orf10 79783     | B2 |
| C7orf13 129790    | B2 |
| C7orf16 10842     | B2 |
| C7orf23 79161     | B2 |
| C7orf25 79020     | B2 |
| C7orf26 79034     | B2 |
| C7orf27 221927    | B2 |
| C7orf29 113763    | B2 |
| C7orf30 115416    | B2 |
| C7orf33 202865    | B2 |
| C7orf34 135927    | B2 |
| C7orf36 57002     | B2 |
| C7orf40 285958    | B2 |
| C7orf42 55069     | B2 |
| C7orf44 55744     | B2 |
| C7orf45 136263    | B2 |
| C7orf46 340277    | B2 |
| C7orf49 78996     | B2 |
| C7orf4 64433      | B2 |
| C7orf50 84310     | B2 |
| C7orf52 375607    | B2 |
| C7orf53 286006    | B2 |
| C7orf54 27099     | B2 |
| C7orf55 154791    | B2 |
| C7orf57 136288    | B2 |
| C7orf59 389541    | B2 |
| C7orf60 154743    | B2 |
| C7orf61 402573    | B2 |
| C7orf63 79846     | B2 |
| C7orf64 84060     | B2 |
| C7orf65 401335    | B2 |
| C7orf68 29923     | B2 |
| C7orf69 80099     | B2 |
| C7orf71 285941    | B2 |
| C7orf72 100130988 | B2 |
| C8A 731           | B2 |
| C8B 732           | B2 |
| C8G 733           | B2 |
| C8ORFK29 340393   | B2 |
| C8orf12 83656     | B2 |
| C8orf22 492307    | B2 |
| C8orf31 286122    | B2 |
| C8orf33 65265     | B2 |
| C8orf34 116328    | B2 |

|                    |    |
|--------------------|----|
| C8orf37 157657     | B2 |
| C8orf39 55472      | B2 |
| C8orf40 114926     | B2 |
| C8orf41 80185      | B2 |
| C8orf42 157695     | B2 |
| C8orf44 56260      | B2 |
| C8orf45 157777     | B2 |
| C8orf46 254778     | B2 |
| C8orf47 203111     | B2 |
| C8orf48 157773     | B2 |
| C8orf4 56892       | B2 |
| C8orf55 51337      | B2 |
| C8orf56 157556     | B2 |
| C8orf59 401466     | B2 |
| C8orf73 642475     | B2 |
| C8orf75 619351     | B2 |
| C8orf77 286103     | B2 |
| C8orf80 389643     | B2 |
| C8orf84 157869     | B2 |
| C8orf85 441376     | B2 |
| C8orf86 389649     | B2 |
| C9orf103 414328    | B2 |
| C9orf106 414318    | B2 |
| C9orf109 286333    | B2 |
| C9orf110 100128385 | B2 |
| C9orf114 51490     | B2 |
| C9orf117 286207    | B2 |
| C9orf122 158228    | B2 |
| C9orf123 90871     | B2 |
| C9orf128 392307    | B2 |
| C9orf129 445577    | B2 |
| C9orf135 138255    | B2 |
| C9orf139 401563    | B2 |
| C9orf144 389715    | B2 |
| C9orf150 286343    | B2 |
| C9orf152 401546    | B2 |
| C9orf153 389766    | B2 |
| C9orf167 54863     | B2 |
| C9orf169 375791    | B2 |
| C9orf16 79095      | B2 |
| C9orf170 401535    | B2 |
| C9orf171 389799    | B2 |
| C9orf173 441476    | B2 |
| C9orf23 138716     | B2 |
| C9orf24 84688      | B2 |
| C9orf25 203259     | B2 |
| C9orf37 85026      | B2 |
| C9orf3 84909       | B2 |
| C9orf40 55071      | B2 |
| C9orf41 138199     | B2 |
| C9orf43 257169     | B2 |

|                |    |
|----------------|----|
| C9orf44 158314 | B2 |
| C9orf45 81571  | B2 |
| C9orf47 286223 | B2 |
| C9orf4 23732   | B2 |
| C9orf50 375759 | B2 |
| C9orf53 51198  | B2 |
| C9orf57 138240 | B2 |
| C9orf68 55064  | B2 |
| C9orf69 90120  | B2 |
| C9orf6 54942   | B2 |
| C9orf70 84850  | B2 |
| C9orf71 169693 | B2 |
| C9orf78 51759  | B2 |
| C9orf79 286234 | B2 |
| C9orf80 58493  | B2 |
| C9orf82 79886  | B2 |
| C9orf84 158401 | B2 |
| C9orf86 55684  | B2 |
| C9orf93 203238 | B2 |
| C9orf96 169436 | B2 |
| C9orf9 11092   | B2 |
| C9 735         | B2 |
| CA10 56934     | B2 |
| CA13 377677    | B2 |
| CA14 23632     | B2 |
| CA1 759        | B2 |
| CA2 760        | B2 |
| CA3 761        | B2 |
| CA5A 763       | B2 |
| CA5BP 340591   | B2 |
| CA6 765        | B2 |
| CA7 766        | B2 |
| CA8 767        | B2 |
| CA9 768        | B2 |
| CAB39 51719    | B2 |
| CABC1 56997    | B2 |
| CABIN1 23523   | B2 |
| CABLES1 91768  | B2 |
| CABP4 57010    | B2 |
| CABP5 56344    | B2 |
| CABP7 164633   | B2 |
| CACNA1A 773    | B2 |
| CACNA1B 774    | B2 |
| CACNA1E 777    | B2 |
| CACNA1F 778    | B2 |
| CACNA1G 8913   | B2 |
| CACNA1H 8912   | B2 |
| CACNA1I 8911   | B2 |
| CACNA1S 779    | B2 |
| CACNA2D1 781   | B2 |
| CACNA2D2 9254  | B2 |

|                 |    |
|-----------------|----|
| CACNA2D3 55799  | B2 |
| CACNA2D4 93589  | B2 |
| CACNB1 782      | B2 |
| CACNB2 783      | B2 |
| CACNB4 785      | B2 |
| CACNG1 786      | B2 |
| CACNG2 10369    | B2 |
| CACNG3 10368    | B2 |
| CACNG5 27091    | B2 |
| CACNG6 59285    | B2 |
| CACNG7 59284    | B2 |
| CACNG8 59283    | B2 |
| CADM1 23705     | B2 |
| CADM2 253559    | B2 |
| CADM4 199731    | B2 |
| CADPS2 93664    | B2 |
| CAD 790         | B2 |
| CAGE1 285782    | B2 |
| CALB1 793       | B2 |
| CALCA 796       | B2 |
| CALCB 797       | B2 |
| CALCOCO2 10241  | B2 |
| CALCRL 10203    | B2 |
| CALCR 799       | B2 |
| CALHM1 255022   | B2 |
| CALHM2 51063    | B2 |
| CALHM3 119395   | B2 |
| CALM1 801       | B2 |
| CALM3 808       | B2 |
| CALML3 810      | B2 |
| CALML4 91860    | B2 |
| CALML5 51806    | B2 |
| CALML6 163688   | B2 |
| CALR3 125972    | B2 |
| CALY 50632      | B2 |
| CAMK1D 57118    | B2 |
| CAMK1G 57172    | B2 |
| CAMK2A 815      | B2 |
| CAMK2B 816      | B2 |
| CAMK2D 817      | B2 |
| CAMK2G 818      | B2 |
| CAMK2N1 55450   | B2 |
| CAMK4 814       | B2 |
| CAMKK1 84254    | B2 |
| CAMKV 79012     | B2 |
| CAMLG 819       | B2 |
| CAMP 820        | B2 |
| CAMSAP1L1 23271 | B2 |
| CAMSAP1 157922  | B2 |
| CAMTA1 23261    | B2 |
| CAND2 23066     | B2 |

|                   |    |
|-------------------|----|
| CAP2 10486        | B2 |
| CAPN10 11132      | B2 |
| CAPN12 147968     | B2 |
| CAPN14 440854     | B2 |
| CAPN2 824         | B2 |
| CAPN7 23473       | B2 |
| CAPN8 388743      | B2 |
| CAPN9 10753       | B2 |
| CAPNS1 826        | B2 |
| CAPNS2 84290      | B2 |
| CAPSL 133690      | B2 |
| CAPZA2 830        | B2 |
| CARD11 84433      | B2 |
| CARD14 79092      | B2 |
| CARD16 114769     | B2 |
| CARD17 440068     | B2 |
| CARD18 59082      | B2 |
| CARD9 64170       | B2 |
| CARHSP1 23589     | B2 |
| CARKD 55739       | B2 |
| CARNS1 57571      | B2 |
| CARS2 79587       | B2 |
| CARS 833          | B2 |
| CARTPT 9607       | B2 |
| CASC1 55259       | B2 |
| CASC2 255082      | B2 |
| CASC3 22794       | B2 |
| CASC4 113201      | B2 |
| CASD1 64921       | B2 |
| CASKIN1 57524     | B2 |
| CASK 8573         | B2 |
| CASP10 843        | B2 |
| CASP14 23581      | B2 |
| CASP4 837         | B2 |
| CASP5 838         | B2 |
| CASP7 840         | B2 |
| CASP8AP2 9994     | B2 |
| CASP8 841         | B2 |
| CASP9 842         | B2 |
| CASQ1 844         | B2 |
| CASQ2 845         | B2 |
| CASR 846          | B2 |
| CASS4 57091       | B2 |
| CAST 831          | B2 |
| CASZ1 54897       | B2 |
| CATSPER2P1 440278 | B2 |
| CATSPER3 347732   | B2 |
| CATSPER4 378807   | B2 |
| CATSPERB 79820    | B2 |
| CATSPERG 57828    | B2 |
| CAV3 859          | B2 |

|                |    |
|----------------|----|
| CBARA1 10367   | B2 |
| CBFA2T2 9139   | B2 |
| CBFA2T3 863    | B2 |
| CBLB 868       | B2 |
| CBLL1 79872    | B2 |
| CBLN1 869      | B2 |
| CBLN2 147381   | B2 |
| CBLN3 643866   | B2 |
| CBLN4 140689   | B2 |
| CBR1 873       | B2 |
| CBR3 874       | B2 |
| CBR4 84869     | B2 |
| CBS 875        | B2 |
| CBWD1 55871    | B2 |
| CBWD2 150472   | B2 |
| CBWD3 445571   | B2 |
| CBWD5 220869   | B2 |
| CBWD6 644019   | B2 |
| CBX5 23468     | B2 |
| CBX8 57332     | B2 |
| CBY1 25776     | B2 |
| CC2D1A 54862   | B2 |
| CC2D1B 200014  | B2 |
| CCBL1 883      | B2 |
| CCBL2 56267    | B2 |
| CCBP2 1238     | B2 |
| CCDC101 112869 | B2 |
| CCDC102B 79839 | B2 |
| CCDC103 388389 | B2 |
| CCDC104 112942 | B2 |
| CCDC106 29903  | B2 |
| CCDC108 255101 | B2 |
| CCDC109A 90550 | B2 |
| CCDC110 256309 | B2 |
| CCDC113 29070  | B2 |
| CCDC114 93233  | B2 |
| CCDC115 84317  | B2 |
| CCDC117 150275 | B2 |
| CCDC11 220136  | B2 |
| CCDC120 90060  | B2 |
| CCDC122 160857 | B2 |
| CCDC124 115098 | B2 |
| CCDC126 90693  | B2 |
| CCDC127 133957 | B2 |
| CCDC129 223075 | B2 |
| CCDC12 151903  | B2 |
| CCDC130 81576  | B2 |
| CCDC132 55610  | B2 |
| CCDC134 79879  | B2 |
| CCDC135 84229  | B2 |
| CCDC13 152206  | B2 |

|                  |    |
|------------------|----|
| CCDC140 151278   | B2 |
| CCDC141 285025   | B2 |
| CCDC142 84865    | B2 |
| CCDC144A 9720    | B2 |
| CCDC144B 284047  | B2 |
| CCDC144C 348254  | B2 |
| CCDC144NL 339184 | B2 |
| CCDC146 57639    | B2 |
| CCDC147 159686   | B2 |
| CCDC148 130940   | B2 |
| CCDC149 91050    | B2 |
| CCDC14 64770     | B2 |
| CCDC151 115948   | B2 |
| CCDC153 283152   | B2 |
| CCDC154 645811   | B2 |
| CCDC155 147872   | B2 |
| CCDC157 550631   | B2 |
| CCDC159 126075   | B2 |
| CCDC15 80071     | B2 |
| CCDC160 347475   | B2 |
| CCDC163P 126661  | B2 |
| CCDC18 343099    | B2 |
| CCDC21 64793     | B2 |
| CCDC23 374969    | B2 |
| CCDC27 148870    | B2 |
| CCDC28B 79140    | B2 |
| CCDC30 728621    | B2 |
| CCDC33 80125     | B2 |
| CCDC34 91057     | B2 |
| CCDC37 348807    | B2 |
| CCDC38 120935    | B2 |
| CCDC39 339829    | B2 |
| CCDC40 55036     | B2 |
| CCDC41 51134     | B2 |
| CCDC42B 387885   | B2 |
| CCDC42 146849    | B2 |
| CCDC45 90799     | B2 |
| CCDC47 57003     | B2 |
| CCDC48 79825     | B2 |
| CCDC53 51019     | B2 |
| CCDC55 84081     | B2 |
| CCDC56 28958     | B2 |
| CCDC57 284001    | B2 |
| CCDC59 29080     | B2 |
| CCDC60 160777    | B2 |
| CCDC61 729440    | B2 |
| CCDC62 84660     | B2 |
| CCDC63 160762    | B2 |
| CCDC64B 146439   | B2 |
| CCDC65 85478     | B2 |
| CCDC66 285331    | B2 |

|                    |    |
|--------------------|----|
| CCDC67 159989      | B2 |
| CCDC6 8030         | B2 |
| CCDC70 83446       | B2 |
| CCDC71 64925       | B2 |
| CCDC72 51372       | B2 |
| CCDC73 493860      | B2 |
| CCDC74A 90557      | B2 |
| CCDC74B 91409      | B2 |
| CCDC77 84318       | B2 |
| CCDC79 283847      | B2 |
| CCDC7 221016       | B2 |
| CCDC81 60494       | B2 |
| CCDC83 220047      | B2 |
| CCDC84 338657      | B2 |
| CCDC85B 11007      | B2 |
| CCDC85C 317762     | B2 |
| CCDC86 79080       | B2 |
| CCDC88A 55704      | B2 |
| CCDC88B 283234     | B2 |
| CCDC89 220388      | B2 |
| CCDC90A 63933      | B2 |
| CCDC90B 60492      | B2 |
| CCDC91 55297       | B2 |
| CCDC94 55702       | B2 |
| CCDC97 90324       | B2 |
| CCDC9 26093        | B2 |
| CCHCR1 54535       | B2 |
| CCIN 881           | B2 |
| CCKAR 886          | B2 |
| CCKBR 887          | B2 |
| CCK 885            | B2 |
| CCL11 6356         | B2 |
| CCL13 6357         | B2 |
| CCL14-CCL15 348249 | B2 |
| CCL15 6359         | B2 |
| CCL17 6361         | B2 |
| CCL18 6362         | B2 |
| CCL19 6363         | B2 |
| CCL1 6346          | B2 |
| CCL20 6364         | B2 |
| CCL22 6367         | B2 |
| CCL24 6369         | B2 |
| CCL25 6370         | B2 |
| CCL26 10344        | B2 |
| CCL27 10850        | B2 |
| CCL2 6347          | B2 |
| CCL3L1 6349        | B2 |
| CCL3L3 414062      | B2 |
| CCL3 6348          | B2 |
| CCL4L2 388372      | B2 |
| CCL4 6351          | B2 |



|                |    |
|----------------|----|
| CCL5 6352      | B2 |
| CCL7 6354      | B2 |
| CCL8 6355      | B2 |
| CCM2 83605     | B2 |
| CCNA1 8900     | B2 |
| CCNB3 85417    | B2 |
| CCNC 892       | B2 |
| CCND1 595      | B2 |
| CCNG2 901      | B2 |
| CCNH 902       | B2 |
| CCNI2 645121   | B2 |
| CCNI 10983     | B2 |
| CCNJL 79616    | B2 |
| CCNJ 54619     | B2 |
| CCNL2 81669    | B2 |
| CCNT1 904      | B2 |
| CCNT2 905      | B2 |
| CCNYL1 151195  | B2 |
| CCNY 219771    | B2 |
| CCPG1 9236     | B2 |
| CCR1 1230      | B2 |
| CCR2 729230    | B2 |
| CCR3 1232      | B2 |
| CCR4 1233      | B2 |
| CCR5 1234      | B2 |
| CCR6 1235      | B2 |
| CCR7 1236      | B2 |
| CCR9 10803     | B2 |
| CCRL2 9034     | B2 |
| CCRN4L 25819   | B2 |
| CCS 9973       | B2 |
| CCT4 10575     | B2 |
| CCT6A 908      | B2 |
| CCT6B 10693    | B2 |
| CCT6P1 643253  | B2 |
| CCT8L2 150160  | B2 |
| CD101 9398     | B2 |
| CD109 135228   | B2 |
| CD14 929       | B2 |
| CD151 977      | B2 |
| CD163L1 283316 | B2 |
| CD163 9332     | B2 |
| CD164 8763     | B2 |
| CD177 57126    | B2 |
| CD180 4064     | B2 |
| CD19 930       | B2 |
| CD1A 909       | B2 |
| CD1B 910       | B2 |
| CD1C 911       | B2 |
| CD1D 912       | B2 |
| CD1E 913       | B2 |

|                   |    |
|-------------------|----|
| CD200R1L 344807   | B2 |
| CD200R1 131450    | B2 |
| CD207 50489       | B2 |
| CD226 10666       | B2 |
| CD22 933          | B2 |
| CD244 51744       | B2 |
| CD247 919         | B2 |
| CD24 100133941    | B2 |
| CD274 29126       | B2 |
| CD27 939          | B2 |
| CD28 940          | B2 |
| CD2BP2 10421      | B2 |
| CD2 914           | B2 |
| CD300A 11314      | B2 |
| CD300C 10871      | B2 |
| CD300E 342510     | B2 |
| CD300LB 124599    | B2 |
| CD300LD 100131439 | B2 |
| CD300LF 146722    | B2 |
| CD320 51293       | B2 |
| CD33 945          | B2 |
| CD37 951          | B2 |
| CD38 952          | B2 |
| CD3D 915          | B2 |
| CD3EAP 10849      | B2 |
| CD3E 916          | B2 |
| CD3G 917          | B2 |
| CD40LG 959        | B2 |
| CD40 958          | B2 |
| CD44 960          | B2 |
| CD47 961          | B2 |
| CD48 962          | B2 |
| CD4 920           | B2 |
| CD52 1043         | B2 |
| CD53 963          | B2 |
| CD55 1604         | B2 |
| CD58 965          | B2 |
| CD59 966          | B2 |
| CD5L 922          | B2 |
| CD5 921           | B2 |
| CD63 967          | B2 |
| CD68 968          | B2 |
| CD69 969          | B2 |
| CD6 923           | B2 |
| CD70 970          | B2 |
| CD72 971          | B2 |
| CD74 972          | B2 |
| CD79A 973         | B2 |
| CD79B 974         | B2 |
| CD7 924           | B2 |
| CD82 3732         | B2 |

|                 |    |
|-----------------|----|
| CD83 9308       | B2 |
| CD84 8832       | B2 |
| CD8A 925        | B2 |
| CD8B 926        | B2 |
| CD96 10225      | B2 |
| CD97 976        | B2 |
| CD99 4267       | B2 |
| CDAN1 146059    | B2 |
| CDA 978         | B2 |
| CDC14A 8556     | B2 |
| CDC16 8881      | B2 |
| CDC20B 166979   | B2 |
| CDC23 8697      | B2 |
| CDC25B 994      | B2 |
| CDC26 246184    | B2 |
| CDC27 996       | B2 |
| CDC34 997       | B2 |
| CDC37L1 55664   | B2 |
| CDC37 11140     | B2 |
| CDC40 51362     | B2 |
| CDC42BPA 8476   | B2 |
| CDC42BPB 9578   | B2 |
| CDC42BPG 55561  | B2 |
| CDC42EP1 11135  | B2 |
| CDC42EP5 148170 | B2 |
| CDC42SE2 56990  | B2 |
| CDC5L 988       | B2 |
| CDCA7L 55536    | B2 |
| CDCA7 83879     | B2 |
| CDH10 1008      | B2 |
| CDH15 1013      | B2 |
| CDH16 1014      | B2 |
| CDH17 1015      | B2 |
| CDH18 1016      | B2 |
| CDH19 28513     | B2 |
| CDH1 999        | B2 |
| CDH22 64405     | B2 |
| CDH24 64403     | B2 |
| CDH26 60437     | B2 |
| CDH2 1000       | B2 |
| CDH3 1001       | B2 |
| CDH6 1004       | B2 |
| CDH7 1005       | B2 |
| CDH8 1006       | B2 |
| CDH9 1007       | B2 |
| CDHR1 92211     | B2 |
| CDHR2 54825     | B2 |
| CDHR3 222256    | B2 |
| CDHR4 389118    | B2 |
| CDHR5 53841     | B2 |
| CDIPT 10423     | B2 |

|                  |    |
|------------------|----|
| CDK11A 728642    | B2 |
| CDK11B 984       | B2 |
| CDK12 51755      | B2 |
| CDK13 8621       | B2 |
| CDK14 5218       | B2 |
| CDK15 65061      | B2 |
| CDK17 5128       | B2 |
| CDK18 5129       | B2 |
| CDK19 23097      | B2 |
| CDK20 23552      | B2 |
| CDK2AP1 8099     | B2 |
| CDK5R1 8851      | B2 |
| CDK5R2 8941      | B2 |
| CDK5RAP1 51654   | B2 |
| CDK5RAP2 55755   | B2 |
| CDK5RAP3 80279   | B2 |
| CDK8 1024        | B2 |
| CDK9 1025        | B2 |
| CDKAL1 54901     | B2 |
| CDKL1 8814       | B2 |
| CDKL3 51265      | B2 |
| CDKL4 344387     | B2 |
| CDKL5 6792       | B2 |
| CDKN1A 1026      | B2 |
| CDKN1B 1027      | B2 |
| CDKN2AIPNL 91368 | B2 |
| CDKN2A 1029      | B2 |
| CDKN2B 1030      | B2 |
| CDON 50937       | B2 |
| CDR1 1038        | B2 |
| CDRT15P 94158    | B2 |
| CDRT15 146822    | B2 |
| CDRT1 374286     | B2 |
| CDS2 8760        | B2 |
| CDSN 1041        | B2 |
| CDV3 55573       | B2 |
| CDX1 1044        | B2 |
| CDX2 1045        | B2 |
| CDYL2 124359     | B2 |
| CDYL 9425        | B2 |
| CEACAM16 388551  | B2 |
| CEACAM19 56971   | B2 |
| CEACAM1 634      | B2 |
| CEACAM20 125931  | B2 |
| CEACAM21 90273   | B2 |
| CEACAM22P 388550 | B2 |
| CEACAM3 1084     | B2 |
| CEACAM4 1089     | B2 |
| CEACAM5 1048     | B2 |
| CEACAM6 4680     | B2 |
| CEACAM7 1087     | B2 |

|                 |    |
|-----------------|----|
| CEACAM8 1088    | B2 |
| CEBPB 1051      | B2 |
| CEBPE 1053      | B2 |
| CEBPG 1054      | B2 |
| CEBPZ 10153     | B2 |
| CECR1 51816     | B2 |
| CECR2 27443     | B2 |
| CECR4 100130717 | B2 |
| CECR5 27440     | B2 |
| CECR6 27439     | B2 |
| CELA1 1990      | B2 |
| CELA2B 51032    | B2 |
| CELA3B 23436    | B2 |
| CELF1 10658     | B2 |
| CELF3 11189     | B2 |
| CELF4 56853     | B2 |
| CELF5 60680     | B2 |
| CELP 1057       | B2 |
| CELSR2 1952     | B2 |
| CEL 1056        | B2 |
| CEMP1 752014    | B2 |
| CEND1 51286     | B2 |
| CENPBD1 92806   | B2 |
| CENPB 1059      | B2 |
| CENPJ 55835     | B2 |
| CENPQ 55166     | B2 |
| CENPV 201161    | B2 |
| CENPW 387103    | B2 |
| CEP110 11064    | B2 |
| CEP135 9662     | B2 |
| CEP152 22995    | B2 |
| CEP170L 645455  | B2 |
| CEP170 9859     | B2 |
| CEP192 55125    | B2 |
| CEP250 11190    | B2 |
| CEP290 80184    | B2 |
| CEP63 80254     | B2 |
| CEP72 55722     | B2 |
| CEP76 79959     | B2 |
| CEPT1 10390     | B2 |
| CER1 9350       | B2 |
| CERK 64781      | B2 |
| CES3 23491      | B2 |
| CES7 221223     | B2 |
| CES8 283848     | B2 |
| CETN3 1070      | B2 |
| CETP 1071       | B2 |
| CFC1B 653275    | B2 |
| CFDP1 10428     | B2 |
| CFHR1 3078      | B2 |
| CFHR3 10878     | B2 |

|                |    |
|----------------|----|
| CFHR4 10877    | B2 |
| CFHR5 81494    | B2 |
| CFL2 1073      | B2 |
| CFP 5199       | B2 |
| CFTR 1080      | B2 |
| CGA 1081       | B2 |
| CGB1 114335    | B2 |
| CGB2 114336    | B2 |
| CGB5 93659     | B2 |
| CGB8 94115     | B2 |
| CGB 1082       | B2 |
| CGGBP1 8545    | B2 |
| CGREF1 10669   | B2 |
| CHAC1 79094    | B2 |
| CHADL 150356   | B2 |
| CHAD 1101      | B2 |
| CHCHD10 400916 | B2 |
| CHCHD2 51142   | B2 |
| CHCHD3 54927   | B2 |
| CHCHD4 131474  | B2 |
| CHCHD6 84303   | B2 |
| CHCHD7 79145   | B2 |
| CHD1L 9557     | B2 |
| CHD1 1105      | B2 |
| CHD3 1107      | B2 |
| CHD5 26038     | B2 |
| CHD6 84181     | B2 |
| CHD7 55636     | B2 |
| CHD8 57680     | B2 |
| CHDH 55349     | B2 |
| CHERP 10523    | B2 |
| CHGA 1113      | B2 |
| CHGB 1114      | B2 |
| CHI3L1 1116    | B2 |
| CHI3L2 1117    | B2 |
| CHIA 27159     | B2 |
| CHIC1 53344    | B2 |
| CHID1 66005    | B2 |
| CHIT1 1118     | B2 |
| CHKA 1119      | B2 |
| CHKB 1120      | B2 |
| CHMP1A 5119    | B2 |
| CHMP1B 57132   | B2 |
| CHMP2A 27243   | B2 |
| CHMP2B 25978   | B2 |
| CHMP4A 29082   | B2 |
| CHMP4C 92421   | B2 |
| CHMP6 79643    | B2 |
| CHMP7 91782    | B2 |
| CHM 1121       | B2 |
| CHN1 1123      | B2 |

|               |    |
|---------------|----|
| CHN2 1124     | B2 |
| CHODL 140578  | B2 |
| CHP2 63928    | B2 |
| CHPT1 56994   | B2 |
| CHP 11261     | B2 |
| CHRD 25884    | B2 |
| CHRD 8646     | B2 |
| CHRM1 1128    | B2 |
| CHRM2 1129    | B2 |
| CHRM3 1131    | B2 |
| CHRM4 1132    | B2 |
| CHRM5 1133    | B2 |
| CHRNA10 57053 | B2 |
| CHRNA1 1134   | B2 |
| CHRNA2 1135   | B2 |
| CHRNA3 1136   | B2 |
| CHRNA4 1137   | B2 |
| CHRNA5 1138   | B2 |
| CHRNA9 55584  | B2 |
| CHRN1 1140    | B2 |
| CHRN2 1141    | B2 |
| CHRN3 1142    | B2 |
| CHRN4 1143    | B2 |
| CHRN5 1144    | B2 |
| CHRN6 1145    | B2 |
| CHRN7 1146    | B2 |
| CHST10 9486   | B2 |
| CHST12 55501  | B2 |
| CHST13 166012 | B2 |
| CHST14 113189 | B2 |
| CHST1 8534    | B2 |
| CHST4 10164   | B2 |
| CHST5 23563   | B2 |
| CHST8 64377   | B2 |
| CHSY1 22856   | B2 |
| CHTF8 54921   | B2 |
| CHUK 1147     | B2 |
| CIAO1 9391    | B2 |
| CIAPIN1 57019 | B2 |
| CIB1 10519    | B2 |
| CIB2 10518    | B2 |
| CIB4 130106   | B2 |
| CIC 23152     | B2 |
| CIDEB 27141   | B2 |
| CIDTCP 152302 | B2 |
| CIITA 4261    | B2 |
| CILP 8483     | B2 |
| CINP 51550    | B2 |
| CIR1 9541     | B2 |
| CIRH1A 84916  | B2 |
| CISD1 55847   | B2 |

|                |    |
|----------------|----|
| CISD3 284106   | B2 |
| CITED1 4435    | B2 |
| CITED4 163732  | B2 |
| CIZ1 25792     | B2 |
| CKB 1152       | B2 |
| CKMT1A 548596  | B2 |
| CKMT1B 1159    | B2 |
| CKMT2 1160     | B2 |
| CKM 1158       | B2 |
| CLASP2 23122   | B2 |
| CLCA1 1179     | B2 |
| CLCA2 9635     | B2 |
| CLCA3P 9629    | B2 |
| CLCC1 23155    | B2 |
| CLCF1 23529    | B2 |
| CLCN1 1180     | B2 |
| CLCN3 1182     | B2 |
| CLCN4 1183     | B2 |
| CLCN5 1184     | B2 |
| CLCNKA 1187    | B2 |
| CLC 1178       | B2 |
| CLDN10 9071    | B2 |
| CLDN12 9069    | B2 |
| CLDN16 10686   | B2 |
| CLDN17 26285   | B2 |
| CLDN1 9076     | B2 |
| CLDN20 49861   | B2 |
| CLDN23 137075  | B2 |
| CLDN25 644672  | B2 |
| CLDN2 9075     | B2 |
| CLDN3 1365     | B2 |
| CLDN4 1364     | B2 |
| CLDN6 9074     | B2 |
| CLDN8 9073     | B2 |
| CLDN9 9080     | B2 |
| CLDND1 56650   | B2 |
| CLEC10A 10462  | B2 |
| CLEC12A 160364 | B2 |
| CLEC12B 387837 | B2 |
| CLEC16A 23274  | B2 |
| CLEC17A 388512 | B2 |
| CLEC18A 348174 | B2 |
| CLEC18B 497190 | B2 |
| CLEC18C 283971 | B2 |
| CLEC1B 51266   | B2 |
| CLEC2A 387836  | B2 |
| CLEC2B 9976    | B2 |
| CLEC2D 29121   | B2 |
| CLEC3A 10143   | B2 |
| CLEC4A 50856   | B2 |
| CLEC4C 170482  | B2 |



|                |    |
|----------------|----|
| CLEC4D 338339  | B2 |
| CLEC4E 26253   | B2 |
| CLEC4M 10332   | B2 |
| CLEC6A 93978   | B2 |
| CLEC7A 64581   | B2 |
| CLEC9A 283420  | B2 |
| CLECL1 160365  | B2 |
| CLIC3 9022     | B2 |
| CLIC4 25932    | B2 |
| CLIC5 53405    | B2 |
| CLIC6 54102    | B2 |
| CLINT1 9685    | B2 |
| CLIP1 6249     | B2 |
| CLIP2 7461     | B2 |
| CLK2P 1197     | B2 |
| CLK2 1196      | B2 |
| CLUU1OS 574016 | B2 |
| CLUU1 574028   | B2 |
| CLMN 79789     | B2 |
| CLN5 1203      | B2 |
| CLNK 116449    | B2 |
| CLNS1A 1207    | B2 |
| CLOCK 9575     | B2 |
| CLP1 10978     | B2 |
| CLPS 1208      | B2 |
| CLPX 10845     | B2 |
| CLRN1OS 116933 | B2 |
| CLRN1 7401     | B2 |
| CLRN3 119467   | B2 |
| CLSTN1 22883   | B2 |
| CLSTN2 64084   | B2 |
| CLSTN3 9746    | B2 |
| CLTA 1211      | B2 |
| CLTB 1212      | B2 |
| CLTCL1 8218    | B2 |
| CLTC 1213      | B2 |
| CLUAP1 23059   | B2 |
| CLUL1 27098    | B2 |
| CLU 1191       | B2 |
| CLVS2 134829   | B2 |
| CMAH 8418      | B2 |
| CMAS 55907     | B2 |
| CMBL 134147    | B2 |
| CMIP 80790     | B2 |
| CMKLR1 1240    | B2 |
| CMPK2 129607   | B2 |
| CMTM1 113540   | B2 |
| CMTM2 146225   | B2 |
| CMTM3 123920   | B2 |
| CMTM4 146223   | B2 |
| CMTM5 116173   | B2 |

|                |    |
|----------------|----|
| CMTM6 54918    | B2 |
| CMTM8 152189   | B2 |
| CMYA5 202333   | B2 |
| CN5H6.4 150384 | B2 |
| CNBD1 168975   | B2 |
| CNBP 7555      | B2 |
| CNDP1 84735    | B2 |
| CNFN 84518     | B2 |
| CNGA1 1259     | B2 |
| CNGA2 1260     | B2 |
| CNGA3 1261     | B2 |
| CNGA4 1262     | B2 |
| CNGB1 1258     | B2 |
| CNGB3 54714    | B2 |
| CNIH3 149111   | B2 |
| CNKSR1 10256   | B2 |
| CNKSR3 154043  | B2 |
| CNN2 1265      | B2 |
| CNN3 1266      | B2 |
| CNNM1 26507    | B2 |
| CNNM2 54805    | B2 |
| CNNM3 26505    | B2 |
| CNOT1 23019    | B2 |
| CNOT2 4848     | B2 |
| CNOT4 4850     | B2 |
| CNOT7 29883    | B2 |
| CNOT8 9337     | B2 |
| CNPY1 285888   | B2 |
| CNPY4 245812   | B2 |
| CNP 1267       | B2 |
| CNR1 1268      | B2 |
| CNR2 1269      | B2 |
| CNST 163882    | B2 |
| CNTD1 124817   | B2 |
| CNTD2 79935    | B2 |
| CNTF 1270      | B2 |
| CNTLN 54875    | B2 |
| CNTN1 1272     | B2 |
| CNTN2 6900     | B2 |
| CNTN3 5067     | B2 |
| CNTN4 152330   | B2 |
| CNTN5 53942    | B2 |
| CNTN6 27255    | B2 |
| CNTNAP1 8506   | B2 |
| CNTNAP2 26047  | B2 |
| CNTNAP4 85445  | B2 |
| CNTNAP5 129684 | B2 |
| CNTROB 116840  | B2 |
| COASY 80347    | B2 |
| COBL 23242     | B2 |
| COBRA1 25920   | B2 |

|                 |    |
|-----------------|----|
| COCH 1690       | B2 |
| COG1 9382       | B2 |
| COG3 83548      | B2 |
| COG4 25839      | B2 |
| COG5 10466      | B2 |
| COG6 57511      | B2 |
| COG8 84342      | B2 |
| COL11A2 1302    | B2 |
| COL13A1 1305    | B2 |
| COL16A1 1307    | B2 |
| COL18A1 80781   | B2 |
| COL19A1 1310    | B2 |
| COL20A1 57642   | B2 |
| COL21A1 81578   | B2 |
| COL22A1 169044  | B2 |
| COL27A1 85301   | B2 |
| COL28A1 340267  | B2 |
| COL29A1 256076  | B2 |
| COL2A1 1280     | B2 |
| COL4A1 1282     | B2 |
| COL4A2 1284     | B2 |
| COL4A3 1285     | B2 |
| COL4A4 1286     | B2 |
| COL4A5 1287     | B2 |
| COL4A6 1288     | B2 |
| COL5A3 50509    | B2 |
| COL6A1 1291     | B2 |
| COL6A2 1292     | B2 |
| COL6A4P2 646300 | B2 |
| COL7A1 1294     | B2 |
| COL8A2 1296     | B2 |
| COL9A1 1297     | B2 |
| COL9A2 1298     | B2 |
| COL9A3 1299     | B2 |
| COLEC10 10584   | B2 |
| COLEC12 81035   | B2 |
| COLQ 8292       | B2 |
| COMMD1 150684   | B2 |
| COMMD2 51122    | B2 |
| COMMD8 54951    | B2 |
| COMMD9 29099    | B2 |
| COMT 1312       | B2 |
| COPG2 26958     | B2 |
| COPS3 8533      | B2 |
| COPS4 51138     | B2 |
| COPS6 10980     | B2 |
| COPS7A 50813    | B2 |
| COPS7B 64708    | B2 |
| COPZ2 51226     | B2 |
| COQ10A 93058    | B2 |
| COQ10B 80219    | B2 |

|               |    |
|---------------|----|
| COQ2 27235    | B2 |
| COQ3 51805    | B2 |
| COQ4 51117    | B2 |
| COQ5 84274    | B2 |
| COQ6 51004    | B2 |
| COQ7 10229    | B2 |
| COQ9 57017    | B2 |
| CORO1A 11151  | B2 |
| CORO6 84940   | B2 |
| CORT 1325     | B2 |
| COTL1 23406   | B2 |
| COX10 1352    | B2 |
| COX11 1353    | B2 |
| COX15 1355    | B2 |
| COX18 285521  | B2 |
| COX19 90639   | B2 |
| COX4I1 1327   | B2 |
| COX4NB 10328  | B2 |
| COX5A 9377    | B2 |
| COX5B 1329    | B2 |
| COX6A2 1339   | B2 |
| COX6B1 1340   | B2 |
| COX6B2 125965 | B2 |
| COX7A1 1346   | B2 |
| COX7A2L 9167  | B2 |
| COX7B2 170712 | B2 |
| COX7B 1349    | B2 |
| COX7C 1350    | B2 |
| COX8C 341947  | B2 |
| CP110 9738    | B2 |
| CPA2 1358     | B2 |
| CPA3 1359     | B2 |
| CPA4 51200    | B2 |
| CPA5 93979    | B2 |
| CPA6 57094    | B2 |
| CPB1 1360     | B2 |
| CPB2 1361     | B2 |
| CPD 1362      | B2 |
| CPEB2 132864  | B2 |
| CPEB3 22849   | B2 |
| CPEB4 80315   | B2 |
| CPLX1 10815   | B2 |
| CPLX2 10814   | B2 |
| CPLX3 594855  | B2 |
| CPLX4 339302  | B2 |
| CPN1 1369     | B2 |
| CPN2 1370     | B2 |
| CPNE1 8904    | B2 |
| CPNE4 131034  | B2 |
| CPNE5 57699   | B2 |
| CPNE6 9362    | B2 |

|                |    |
|----------------|----|
| CPNE7 27132    | B2 |
| CPNE9 151835   | B2 |
| CPOX 1371      | B2 |
| CPO 130749     | B2 |
| CPPED1 55313   | B2 |
| CPSF1 29894    | B2 |
| CPSF3L 54973   | B2 |
| CPSF4L 642843  | B2 |
| CPSF4 10898    | B2 |
| CPSF7 79869    | B2 |
| CPT1A 1374     | B2 |
| CPT1B 1375     | B2 |
| CPT1C 126129   | B2 |
| CPT2 1376      | B2 |
| CPXCR1 53336   | B2 |
| CPXM1 56265    | B2 |
| CPZ 8532       | B2 |
| CP 1356        | B2 |
| CR1L 1379      | B2 |
| CR2 1380       | B2 |
| CRABP1 1381    | B2 |
| CRAMP1L 57585  | B2 |
| CRAT 1384      | B2 |
| CRB1 23418     | B2 |
| CRCT1 54544    | B2 |
| CREB1 1385     | B2 |
| CREB3L2 64764  | B2 |
| CREB3L3 84699  | B2 |
| CREB3 10488    | B2 |
| CREBBP 1387    | B2 |
| CREBZF 58487   | B2 |
| CREG1 8804     | B2 |
| CREG2 200407   | B2 |
| CREM 1390      | B2 |
| CRHR1 1394     | B2 |
| CRH 1392       | B2 |
| CRIP2 1397     | B2 |
| CRIP3 401262   | B2 |
| CRIPAK 285464  | B2 |
| CRIPT 9419     | B2 |
| CRISP1 167     | B2 |
| CRISP2 7180    | B2 |
| CRISP3 10321   | B2 |
| CRISPLD1 83690 | B2 |
| CRISPLD2 83716 | B2 |
| CRKL 1399      | B2 |
| CRLF1 9244     | B2 |
| CRLF2 64109    | B2 |
| CRLF3 51379    | B2 |
| CRLS1 54675    | B2 |
| CRMP1 1400     | B2 |

|                  |    |
|------------------|----|
| CRNN 49860       | B2 |
| CROCC 9696       | B2 |
| CROT 54677       | B2 |
| CRP 1401         | B2 |
| CRTAM 56253      | B2 |
| CRTC1 23373      | B2 |
| CRTC3 64784      | B2 |
| CRX 1406         | B2 |
| CRY1 1407        | B2 |
| CRYAA 1409       | B2 |
| CRYBA1 1411      | B2 |
| CRYBA2 1412      | B2 |
| CRYBA4 1413      | B2 |
| CRYBB1 1414      | B2 |
| CRYBB2 1415      | B2 |
| CRYBB3 1417      | B2 |
| CRYGC 1420       | B2 |
| CRYGD 1421       | B2 |
| CRYGN 155051     | B2 |
| CRYM 1428        | B2 |
| CRYZ 1429        | B2 |
| CSAG1 158511     | B2 |
| CSAG2 728461     | B2 |
| CSAG3 389903     | B2 |
| CSDC2 27254      | B2 |
| CSF1R 1436       | B2 |
| CSF2RA 1438      | B2 |
| CSF2RB 1439      | B2 |
| CSF2 1437        | B2 |
| CSF3R 1441       | B2 |
| CSF3 1440        | B2 |
| CSGALNACT2 55454 | B2 |
| CSH2 1443        | B2 |
| CSMD1 64478      | B2 |
| CSMD3 114788     | B2 |
| CSN1S1 1446      | B2 |
| CSN1S2A 286828   | B2 |
| CSN2 1447        | B2 |
| CSN3 1448        | B2 |
| CSNK1A1L 122011  | B2 |
| CSNK1A1P 161635  | B2 |
| CSNK1A1 1452     | B2 |
| CSNK1D 1453      | B2 |
| CSNK1E 1454      | B2 |
| CSNK1G1 53944    | B2 |
| CSNK1G2 1455     | B2 |
| CSNK1G3 1456     | B2 |
| CSNK2A1P 283106  | B2 |
| CSNK2A1 1457     | B2 |
| CSPG4 1464       | B2 |
| CSPG5 10675      | B2 |

|                  |    |
|------------------|----|
| CSPP1 79848      | B2 |
| CSRP2BP 57325    | B2 |
| CSRP3 8048       | B2 |
| CST11 140880     | B2 |
| CST3 1471        | B2 |
| CST4 1472        | B2 |
| CST5 1473        | B2 |
| CST6 1474        | B2 |
| CST7 8530        | B2 |
| CST9L 128821     | B2 |
| CST9 128822      | B2 |
| CSTA 1475        | B2 |
| CSTB 1476        | B2 |
| CSTF2T 23283     | B2 |
| CSTL1 128817     | B2 |
| CSTT 164380      | B2 |
| CS 1431          | B2 |
| CT45A1 541466    | B2 |
| CT45A2 728911    | B2 |
| CT45A4 441520    | B2 |
| CT45A5 441521    | B2 |
| CT62 196993      | B2 |
| CTAG1B 1485      | B2 |
| CTAG2 30848      | B2 |
| CTAGE1 64693     | B2 |
| CTAGE4 100128553 | B2 |
| CTAGE6 340307    | B2 |
| CTAGE9 643854    | B2 |
| CTBP1 1487       | B2 |
| CTBP2 1488       | B2 |
| CTBS 1486        | B2 |
| CTCFL 140690     | B2 |
| CTCF 10664       | B2 |
| CTDP1 9150       | B2 |
| CTDSPL2 51496    | B2 |
| CTGF 1490        | B2 |
| CTH 1491         | B2 |
| CTLA4 1493       | B2 |
| CTNNA1 1495      | B2 |
| CTNNA2 1496      | B2 |
| CTNNA3 29119     | B2 |
| CTNNB1 1499      | B2 |
| CTNNBIP1 56998   | B2 |
| CTNNBL1 56259    | B2 |
| CTNND1 1500      | B2 |
| CTNND2 1501      | B2 |
| CTNS 1497        | B2 |
| CTR9 9646        | B2 |
| CTRB1 1504       | B2 |
| CTRB2 440387     | B2 |
| CTRC 11330       | B2 |

|                 |    |
|-----------------|----|
| CTRL 1506       | B2 |
| CTSA 5476       | B2 |
| CTSB 1508       | B2 |
| CTSC 1075       | B2 |
| CTSD 1509       | B2 |
| CTSE 1510       | B2 |
| CTSF 8722       | B2 |
| CTSH 1512       | B2 |
| CTSK 1513       | B2 |
| CTSL1 1514      | B2 |
| CTSL2 1515      | B2 |
| CTSO 1519       | B2 |
| CTSS 1520       | B2 |
| CTSW 1521       | B2 |
| CTSZ 1522       | B2 |
| CTTNBP2NL 55917 | B2 |
| CTTN 2017       | B2 |
| CTU1 90353      | B2 |
| CTU2 348180     | B2 |
| CTXN2 399697    | B2 |
| CTXN3 613212    | B2 |
| CUEDC1 404093   | B2 |
| CUEDC2 79004    | B2 |
| CUL1 8454       | B2 |
| CUL2 8453       | B2 |
| CUL3 8452       | B2 |
| CUL4A 8451      | B2 |
| CUL4B 8450      | B2 |
| CUL5 8065       | B2 |
| CUL7 9820       | B2 |
| CUL9 23113      | B2 |
| CUTC 51076      | B2 |
| CUX1 1523       | B2 |
| CUX2 23316      | B2 |
| CUZD1 50624     | B2 |
| CWC15 51503     | B2 |
| CWC25 54883     | B2 |
| CWC27 10283     | B2 |
| CWF19L1 55280   | B2 |
| CWH43 80157     | B2 |
| CXADRP2 646243  | B2 |
| CXADRP3 440224  | B2 |
| CXADR 1525      | B2 |
| CXCL10 3627     | B2 |
| CXCL11 6373     | B2 |
| CXCL13 10563    | B2 |
| CXCL14 9547     | B2 |
| CXCL16 58191    | B2 |
| CXCL17 284340   | B2 |
| CXCL1 2919      | B2 |
| CXCL5 6374      | B2 |



|                    |    |
|--------------------|----|
| CXCL6 6372         | B2 |
| CXCL9 4283         | B2 |
| CXCR1 3577         | B2 |
| CXCR2P1 3580       | B2 |
| CXCR2 3579         | B2 |
| CXCR3 2833         | B2 |
| CXCR4 7852         | B2 |
| CXCR5 643          | B2 |
| CXCR6 10663        | B2 |
| CXXC1 30827        | B2 |
| CXXC4 80319        | B2 |
| CXorf1 9142        | B2 |
| CXorf21 80231      | B2 |
| CXorf22 170063     | B2 |
| CXorf23 256643     | B2 |
| CXorf26 51260      | B2 |
| CXorf27 25763      | B2 |
| CXorf30 645090     | B2 |
| CXorf38 159013     | B2 |
| CXorf41 139212     | B2 |
| CXorf48 54967      | B2 |
| CXorf49B 100132994 | B2 |
| CXorf50B 653687    | B2 |
| CXorf56 63932      | B2 |
| CXorf57 55086      | B2 |
| CXorf58 254158     | B2 |
| CXorf59 286464     | B2 |
| CXorf61 203413     | B2 |
| CXorf64 100130613  | B2 |
| CXorf65 158830     | B2 |
| CYB5A 1528         | B2 |
| CYB5B 80777        | B2 |
| CYB5D1 124637      | B2 |
| CYB5R1 51706       | B2 |
| CYB5R2 51700       | B2 |
| CYB5R4 51167       | B2 |
| CYB5RL 606495      | B2 |
| CYBASC3 220002     | B2 |
| CYBA 1535          | B2 |
| CYBB 1536          | B2 |
| CYC1 1537          | B2 |
| CYCSP52 360155     | B2 |
| CYFIP1 23191       | B2 |
| CYHR1 50626        | B2 |
| CYLD 1540          | B2 |
| CYP11B1 1584       | B2 |
| CYP17A1 1586       | B2 |
| CYP19A1 1588       | B2 |
| CYP1A1 1543        | B2 |
| CYP1A2 1544        | B2 |
| CYP1B1 1545        | B2 |

|                 |    |
|-----------------|----|
| CYP21A2 1589    | B2 |
| CYP24A1 1591    | B2 |
| CYP26A1 1592    | B2 |
| CYP26C1 340665  | B2 |
| CYP27A1 1593    | B2 |
| CYP27B1 1594    | B2 |
| CYP27C1 339761  | B2 |
| CYP2A13 1553    | B2 |
| CYP2A6 1548     | B2 |
| CYP2A7 1549     | B2 |
| CYP2B6 1555     | B2 |
| CYP2C18 1562    | B2 |
| CYP2C19 1557    | B2 |
| CYP2C8 1558     | B2 |
| CYP2C9 1559     | B2 |
| CYP2D6 1565     | B2 |
| CYP2D7P1 1564   | B2 |
| CYP2E1 1571     | B2 |
| CYP2F1 1572     | B2 |
| CYP2J2 1573     | B2 |
| CYP2R1 120227   | B2 |
| CYP2S1 29785    | B2 |
| CYP2W1 54905    | B2 |
| CYP3A43 64816   | B2 |
| CYP3A4 1576     | B2 |
| CYP3A5 1577     | B2 |
| CYP3A7 1551     | B2 |
| CYP4A11 1579    | B2 |
| CYP4A22 284541  | B2 |
| CYP4B1 1580     | B2 |
| CYP4F11 57834   | B2 |
| CYP4F22 126410  | B2 |
| CYP4F2 8529     | B2 |
| CYP4F3 4051     | B2 |
| CYP4F8 11283    | B2 |
| CYP4V2 285440   | B2 |
| CYP4X1 260293   | B2 |
| CYP4Z1 199974   | B2 |
| CYP4Z2P 163720  | B2 |
| CYP7B1 9420     | B2 |
| CYP8B1 1582     | B2 |
| CYS1 192668     | B2 |
| CYSLTR1 10800   | B2 |
| CYSLTR2 57105   | B2 |
| CYTH1 9267      | B2 |
| CYTH2 9266      | B2 |
| CYTH4 27128     | B2 |
| CYTIP 9595      | B2 |
| CYTSA 23384     | B2 |
| CYTSB 92521     | B2 |
| CYorf15A 246126 | B2 |

|                 |    |
|-----------------|----|
| CYorf15B 84663  | B2 |
| D2HGDH 728294   | B2 |
| DAAM1 23002     | B2 |
| DAB1 1600       | B2 |
| DACH1 1602      | B2 |
| DACH2 117154    | B2 |
| DACT3 147906    | B2 |
| DAD1L 56286     | B2 |
| DAG1 1605       | B2 |
| DAGLA 747       | B2 |
| DAK 26007       | B2 |
| DALRD3 55152    | B2 |
| DAND5 199699    | B2 |
| DAO 1610        | B2 |
| DAPK1 1612      | B2 |
| DAPK3 1613      | B2 |
| DAPL1 92196     | B2 |
| DAPP1 27071     | B2 |
| DARS 1615       | B2 |
| DAZAP2 9802     | B2 |
| DAZL 1618       | B2 |
| DBF4B 80174     | B2 |
| DBH 1621        | B2 |
| DBI 1622        | B2 |
| DBN1 1627       | B2 |
| DBNDD2 55861    | B2 |
| DBNL 28988      | B2 |
| DBP 1628        | B2 |
| DBT 1629        | B2 |
| DBX1 120237     | B2 |
| DCAF11 80344    | B2 |
| DCAF12L1 139170 | B2 |
| DCAF12L2 340578 | B2 |
| DCAF15 90379    | B2 |
| DCAF16 54876    | B2 |
| DCAF17 80067    | B2 |
| DCAF4L1 285429  | B2 |
| DCAF4L2 138009  | B2 |
| DCAF4 26094     | B2 |
| DCAF6 55827     | B2 |
| DCAF8L2 347442  | B2 |
| DCAF8 50717     | B2 |
| DCC 1630        | B2 |
| DCDC1 341019    | B2 |
| DCDC2B 149069   | B2 |
| DCDC2 51473     | B2 |
| DCD 117159      | B2 |
| DCI 1632        | B2 |
| DCLK1 9201      | B2 |
| DCLK2 166614    | B2 |
| DCLK3 85443     | B2 |

|                |    |
|----------------|----|
| DCLRE1B 64858  | B2 |
| DCLRE1C 64421  | B2 |
| DCP1B 196513   | B2 |
| DCP2 167227    | B2 |
| DCPS 28960     | B2 |
| DCST1 149095   | B2 |
| DCST2 127579   | B2 |
| DCTD 1635      | B2 |
| DCTN1 1639     | B2 |
| DCTN2 10540    | B2 |
| DCTN3 11258    | B2 |
| DCTN4 51164    | B2 |
| DCTN6 10671    | B2 |
| DCT 1638       | B2 |
| DCUN1D1 54165  | B2 |
| DCUN1D2 55208  | B2 |
| DCXR 51181     | B2 |
| DCX 1641       | B2 |
| DDA1 79016     | B2 |
| DDAH2 23564    | B2 |
| DDC 1644       | B2 |
| DDHD1 80821    | B2 |
| DDHD2 23259    | B2 |
| DDI1 414301    | B2 |
| DDI2 84301     | B2 |
| DDIT3 1649     | B2 |
| DDIT4L 115265  | B2 |
| DDIT4 54541    | B2 |
| DDN 23109      | B2 |
| DDRGK1 65992   | B2 |
| DDTL 100037417 | B2 |
| DDT 1652       | B2 |
| DDX10 1662     | B2 |
| DDX11L2 84771  | B2 |
| DDX11 1663     | B2 |
| DDX12 440081   | B2 |
| DDX18 8886     | B2 |
| DDX1 1653      | B2 |
| DDX20 11218    | B2 |
| DDX21 9188     | B2 |
| DDX27 55661    | B2 |
| DDX28 55794    | B2 |
| DDX31 64794    | B2 |
| DDX3Y 8653     | B2 |
| DDX42 11325    | B2 |
| DDX43 55510    | B2 |
| DDX46 9879     | B2 |
| DDX47 51202    | B2 |
| DDX4 54514     | B2 |
| DDX50 79009    | B2 |
| DDX51 317781   | B2 |

|                   |    |
|-------------------|----|
| DDX52 11056       | B2 |
| DDX53 168400      | B2 |
| DDX54 79039       | B2 |
| DDX55 57696       | B2 |
| DDX59 83479       | B2 |
| DDX5 1655         | B2 |
| DDX60L 91351      | B2 |
| DDX60 55601       | B2 |
| DDX6 1656         | B2 |
| DEAF1 10522       | B2 |
| DEC1 50514        | B2 |
| DECR1 1666        | B2 |
| DECR2 26063       | B2 |
| DEF6 50619        | B2 |
| DEFA1B 728358     | B2 |
| DEFA4 1669        | B2 |
| DEFB103B 414325   | B2 |
| DEFB109P1B 641517 | B2 |
| DEFB118 117285    | B2 |
| DEFB119 245932    | B2 |
| DEFB124 245937    | B2 |
| DEFB125 245938    | B2 |
| DEFB126 81623     | B2 |
| DEFB131 644414    | B2 |
| DEFB132 400830    | B2 |
| DEGS1 8560        | B2 |
| DEK 7913          | B2 |
| DENND1A 57706     | B2 |
| DENND1B 163486    | B2 |
| DENND1C 79958     | B2 |
| DENND4A 10260     | B2 |
| DENND4B 9909      | B2 |
| DEPDC4 120863     | B2 |
| DEPDC5 9681       | B2 |
| DEPDC6 64798      | B2 |
| DERA 51071        | B2 |
| DERL2 51009       | B2 |
| DERL3 91319       | B2 |
| DES 1674          | B2 |
| DEXI 28955        | B2 |
| DFFA 1676         | B2 |
| DFFB 1677         | B2 |
| DFNB31 25861      | B2 |
| DGAT1 8694        | B2 |
| DGAT2L6 347516    | B2 |
| DGCR10 26222      | B2 |
| DGCR11 25786      | B2 |
| DGCR14 8220       | B2 |
| DGCR2 9993        | B2 |
| DGCR5 26220       | B2 |
| DGCR6L 85359      | B2 |

|                |    |
|----------------|----|
| DGCR6 8214     | B2 |
| DGCR8 54487    | B2 |
| DGCR9 25787    | B2 |
| DGKA 1606      | B2 |
| DGKB 1607      | B2 |
| DGKD 8527      | B2 |
| DGKE 8526      | B2 |
| DGKG 1608      | B2 |
| DGKH 160851    | B2 |
| DGKI 9162      | B2 |
| DGKK 139189    | B2 |
| DGKQ 1609      | B2 |
| DGKZ 8525      | B2 |
| DHCR7 1717     | B2 |
| DHDH 27294     | B2 |
| DHFRL1 200895  | B2 |
| DHFR 1719      | B2 |
| DHH 50846      | B2 |
| DHODH 1723     | B2 |
| DHPS 1725      | B2 |
| DHRS1 79154    | B2 |
| DHRS1 115817   | B2 |
| DHRS2 10202    | B2 |
| DHRS4L1 728635 | B2 |
| DHRS4L2 317749 | B2 |
| DHRS4 10901    | B2 |
| DHRS7B 25979   | B2 |
| DHRS7C 201140  | B2 |
| DHRS7 51635    | B2 |
| DHRS9 10170    | B2 |
| DHRSX 207063   | B2 |
| DHX16 8449     | B2 |
| DHX30 22907    | B2 |
| DHX32 55760    | B2 |
| DHX33 56919    | B2 |
| DHX35 60625    | B2 |
| DHX36 170506   | B2 |
| DHX37 57647    | B2 |
| DHX40P1 653645 | B2 |
| DHX40 79665    | B2 |
| DHX57 90957    | B2 |
| DHX58 79132    | B2 |
| DHX8 1659      | B2 |
| DIAPH1 1729    | B2 |
| DICER1 23405   | B2 |
| DIDO1 11083    | B2 |
| DIO1 1733      | B2 |
| DIO2 1734      | B2 |
| DIO3 1735      | B2 |
| DIP2A 23181    | B2 |
| DIP2B 57609    | B2 |

|                       |    |
|-----------------------|----|
| DIRAS1 148252         | B2 |
| DIRAS2 54769          | B2 |
| DIRAS3 9077           | B2 |
| DIRC3 729582          | B2 |
| DIS3L2 129563         | B2 |
| DIS3L 115752          | B2 |
| DIS3 22894            | B2 |
| DISC2 27184           | B2 |
| DISP1 84976           | B2 |
| DISP2 85455           | B2 |
| DKFZP434H168 26077    | B2 |
| DKFZP434K028 26070    | B2 |
| DKFZP586I1420 222161  | B2 |
| DKFZP686I15217 401232 | B2 |
| DKFZp434J0226 93429   | B2 |
| DKFZp434L192 222029   | B2 |
| DKFZp566F0947 94023   | B2 |
| DKFZp686A1627 266695  | B2 |
| DKFZp686O24166 374383 | B2 |
| DKFZp761E198 91056    | B2 |
| DKK1 22943            | B2 |
| DKK2 27123            | B2 |
| DKK4 27121            | B2 |
| DKKL1 27120           | B2 |
| DLAT 1737             | B2 |
| DLD 1738              | B2 |
| DLEU2L 79469          | B2 |
| DLEU7 220107          | B2 |
| DLG1 1739             | B2 |
| DLG4 1742             | B2 |
| DLG5 9231             | B2 |
| DLGAP1 9229           | B2 |
| DLGAP3 58512          | B2 |
| DLGAP4 22839          | B2 |
| DLK1 8788             | B2 |
| DLL3 10683            | B2 |
| DLX1 1745             | B2 |
| DLX2 1746             | B2 |
| DLX3 1747             | B2 |
| DLX4 1748             | B2 |
| DLX5 1749             | B2 |
| DLX6AS 285987         | B2 |
| DLX6 1750             | B2 |
| DMAP1 55929           | B2 |
| DMBT1 1755            | B2 |
| DMBX1 127343          | B2 |
| DMC1 11144            | B2 |
| DMKN 93099            | B2 |
| DMP1 1758             | B2 |
| DMPK 1760             | B2 |
| DMRT1 1761            | B2 |

|                      |    |
|----------------------|----|
| DMRTA1 63951         | B2 |
| DMRTA2 63950         | B2 |
| DMRTB1 63948         | B2 |
| DMRTC1B 728656       | B2 |
| DMRTC1 63947         | B2 |
| DMRTC2 63946         | B2 |
| DMTF1 9988           | B2 |
| DMWD 1762            | B2 |
| DMXL2 23312          | B2 |
| DNAH10 196385        | B2 |
| DNAH11 8701          | B2 |
| DNAH12 201625        | B2 |
| DNAH17 8632          | B2 |
| DNAH2 146754         | B2 |
| DNAH3 55567          | B2 |
| DNAH5 1767           | B2 |
| DNAH7 56171          | B2 |
| DNAH8 1769           | B2 |
| DNAI1 27019          | B2 |
| DNAI2 64446          | B2 |
| DNAJA2 10294         | B2 |
| DNAJB12 54788        | B2 |
| DNAJB13 374407       | B2 |
| DNAJB14 79982        | B2 |
| DNAJB1 3337          | B2 |
| DNAJB2 3300          | B2 |
| DNAJB3 414061        | B2 |
| DNAJB5 25822         | B2 |
| DNAJB6 10049         | B2 |
| DNAJB7 150353        | B2 |
| DNAJB8 165721        | B2 |
| DNAJB9 4189          | B2 |
| DNAJC11 55735        | B2 |
| DNAJC12 56521        | B2 |
| DNAJC13 23317        | B2 |
| DNAJC15 29103        | B2 |
| DNAJC16 23341        | B2 |
| DNAJC17 55192        | B2 |
| DNAJC19 131118       | B2 |
| DNAJC21 134218       | B2 |
| DNAJC24 120526       | B2 |
| DNAJC25-GNG10 552891 | B2 |
| DNAJC25 548645       | B2 |
| DNAJC28 54943        | B2 |
| DNAJC30 84277        | B2 |
| DNAJC3 5611          | B2 |
| DNAJC4 3338          | B2 |
| DNAJC5B 85479        | B2 |
| DNAJC5G 285126       | B2 |
| DNAJC5 80331         | B2 |
| DNAJC6 9829          | B2 |



|                   |    |
|-------------------|----|
| DNAJC8 22826      | B2 |
| DNAL1 83544       | B2 |
| DNAL4 10126       | B2 |
| DNALI1 7802       | B2 |
| DNASE1L1 1774     | B2 |
| DNASE2B 58511     | B2 |
| DND1 373863       | B2 |
| DNER 92737        | B2 |
| DNLZ 728489       | B2 |
| DNM1L 10059       | B2 |
| DNM1P35 100128285 | B2 |
| DNM1 1759         | B2 |
| DNM2 1785         | B2 |
| DNMBP 23268       | B2 |
| DNMT3L 29947      | B2 |
| DNTTIP1 116092    | B2 |
| DNTTIP2 30836     | B2 |
| DNTT 1791         | B2 |
| DOC2A 8448        | B2 |
| DOCK10 55619      | B2 |
| DOCK2 1794        | B2 |
| DOCK3 1795        | B2 |
| DOCK5 80005       | B2 |
| DOCK7 85440       | B2 |
| DOHH 83475        | B2 |
| DOK1 1796         | B2 |
| DOK2 9046         | B2 |
| DOK4 55715        | B2 |
| DOK5 55816        | B2 |
| DOK6 220164       | B2 |
| DOK7 285489       | B2 |
| DOM3Z 1797        | B2 |
| DOT1L 84444       | B2 |
| DPCR1 135656      | B2 |
| DPEP2 64174       | B2 |
| DPEP3 64180       | B2 |
| DPF1 8193         | B2 |
| DPF2 5977         | B2 |
| DPF3 8110         | B2 |
| DPH1 1801         | B2 |
| DPH3B 100132911   | B2 |
| DPH3 285381       | B2 |
| DPH5 51611        | B2 |
| DPM3 54344        | B2 |
| DPP10 57628       | B2 |
| DPP7 29952        | B2 |
| DPP8 54878        | B2 |
| DPPA2 151871      | B2 |
| DPPA3 359787      | B2 |
| DPPA4 55211       | B2 |
| DPPA5 340168      | B2 |

|                  |    |
|------------------|----|
| DPRXP4 503645    | B2 |
| DPY19L1 23333    | B2 |
| DPY19L2P1 554236 | B2 |
| DPY19L2P2 349152 | B2 |
| DPY19L2P4 442523 | B2 |
| DPY19L3 147991   | B2 |
| DPY19L4 286148   | B2 |
| DPYSL3 1809      | B2 |
| DPYSL4 10570     | B2 |
| DPYSL5 56896     | B2 |
| DPYS 1807        | B2 |
| DQX1 165545      | B2 |
| DR1 1810         | B2 |
| DRAM1 55332      | B2 |
| DRAM2 128338     | B2 |
| DRD3 1814        | B2 |
| DRD5 1816        | B2 |
| DRG1 4733        | B2 |
| DRG2 1819        | B2 |
| DRGX 644168      | B2 |
| DSC2 1824        | B2 |
| DSC3 1825        | B2 |
| DSCAML1 57453    | B2 |
| DSCAM 1826       | B2 |
| DSCR3 10311      | B2 |
| DSCR4 10281      | B2 |
| DSCR8 84677      | B2 |
| DSCR9 257203     | B2 |
| DSG1 1828        | B2 |
| DSG2 1829        | B2 |
| DSG3 1830        | B2 |
| DSG4 147409      | B2 |
| DSPP 1834        | B2 |
| DSP 1832         | B2 |
| DSTN 11034       | B2 |
| DSTYK 25778      | B2 |
| DTD1 92675       | B2 |
| DTHD1 401124     | B2 |
| DTNA 1837        | B2 |
| DTNBP1 84062     | B2 |
| DTNB 1838        | B2 |
| DTWD2 285605     | B2 |
| DTX3 196403      | B2 |
| DTX4 23220       | B2 |
| DULLARD 23399    | B2 |
| DUOX1 53905      | B2 |
| DUOX2 50506      | B2 |
| DUOXA1 90527     | B2 |
| DUOXA2 405753    | B2 |
| DUPD1 338599     | B2 |
| DUS1L 64118      | B2 |

|                |    |
|----------------|----|
| DUS2L 54920    | B2 |
| DUS3L 56931    | B2 |
| DUSP10 11221   | B2 |
| DUSP11 8446    | B2 |
| DUSP13 51207   | B2 |
| DUSP15 128853  | B2 |
| DUSP16 80824   | B2 |
| DUSP18 150290  | B2 |
| DUSP23 54935   | B2 |
| DUSP26 78986   | B2 |
| DUSP27 92235   | B2 |
| DUSP28 285193  | B2 |
| DUSP2 1844     | B2 |
| DUSP3 1845     | B2 |
| DUSP4 1846     | B2 |
| DUSP5P 574029  | B2 |
| DUSP5 1847     | B2 |
| DUSP8 1850     | B2 |
| DUSP9 1852     | B2 |
| DUT 1854       | B2 |
| DUXA 503835    | B2 |
| DVL1 1855      | B2 |
| DVL2 1856      | B2 |
| DVWA 344875    | B2 |
| DYDC1 143241   | B2 |
| DYDC2 84332    | B2 |
| DYM 54808      | B2 |
| DYNC1H1 1778   | B2 |
| DYNC1I1 1780   | B2 |
| DYNC1I2 1781   | B2 |
| DYNC2H1 79659  | B2 |
| DYNC2LI1 51626 | B2 |
| DYNLL2 140735  | B2 |
| DYNLRB1 83658  | B2 |
| DYNLRB2 83657  | B2 |
| DYNLT3 6990    | B2 |
| DYRK1A 1859    | B2 |
| DYRK1B 9149    | B2 |
| DYRK2 8445     | B2 |
| DYRK3 8444     | B2 |
| DYRK4 8798     | B2 |
| DYSFIP1 116729 | B2 |
| DYSF 8291      | B2 |
| DYTN 391475    | B2 |
| DZIP3 9666     | B2 |
| E2F4 1874      | B2 |
| E2F6 1876      | B2 |
| EAF2 55840     | B2 |
| EAPP 55837     | B2 |
| EBAG9 9166     | B2 |
| EBF4 57593     | B2 |

|                   |    |
|-------------------|----|
| EBI3 10148        | B2 |
| EBPL 84650        | B2 |
| ECD 11319         | B2 |
| ECEL1 9427        | B2 |
| ECH1 1891         | B2 |
| ECHS1 1892        | B2 |
| ECM1 1893         | B2 |
| ECSIT 51295       | B2 |
| ECT2L 345930      | B2 |
| EDARADD 128178    | B2 |
| EDAR 10913        | B2 |
| EDC3 80153        | B2 |
| EDC4 23644        | B2 |
| EDDM3A 10876      | B2 |
| EDDM3B 64184      | B2 |
| EDEM1 9695        | B2 |
| EDF1 8721         | B2 |
| EDIL3 10085       | B2 |
| EDNRA 1909        | B2 |
| EED 8726          | B2 |
| EEF1A2 1917       | B2 |
| EEF1DP3 196549    | B2 |
| EEF1D 1936        | B2 |
| EEF1G 1937        | B2 |
| EEFSEC 60678      | B2 |
| EFCAB10 100130771 | B2 |
| EFCAB2 84288      | B2 |
| EFCAB3 146779     | B2 |
| EFCAB4A 283229    | B2 |
| EFCAB4B 84766     | B2 |
| EFCAB5 374786     | B2 |
| EFCAB6 64800      | B2 |
| EFCAB7 84455      | B2 |
| EFEMP2 30008      | B2 |
| EFHA1 221154      | B2 |
| EFHB 151651       | B2 |
| EFHC1 114327      | B2 |
| EFHC2 80258       | B2 |
| EFHD1 80303       | B2 |
| EFHD2 79180       | B2 |
| EFNA2 1943        | B2 |
| EFNA5 1946        | B2 |
| EFNB2 1948        | B2 |
| EFR3B 22979       | B2 |
| EFS 10278         | B2 |
| EFTUD1 79631      | B2 |
| EGFL6 25975       | B2 |
| EGFR 1956         | B2 |
| EGF 1950          | B2 |
| EGLN1 54583       | B2 |
| EGLN2 112398      | B2 |

|                 |    |
|-----------------|----|
| EGLN3 112399    | B2 |
| EGOT 100126791  | B2 |
| EGR4 1961       | B2 |
| EHP1L1 254102   | B2 |
| EHD1 10938      | B2 |
| EHD4 30844      | B2 |
| EHF 26298       | B2 |
| EHMT1 79813     | B2 |
| EI24 9538       | B2 |
| EID2 163126     | B2 |
| EIF1AX 1964     | B2 |
| EIF1AY 9086     | B2 |
| EIF2AK4 440275  | B2 |
| EIF2A 83939     | B2 |
| EIF2B1 1967     | B2 |
| EIF2B2 8892     | B2 |
| EIF2B4 8890     | B2 |
| EIF2B5 8893     | B2 |
| EIF2C1 26523    | B2 |
| EIF2C2 27161    | B2 |
| EIF2C3 192669   | B2 |
| EIF2S1 1965     | B2 |
| EIF2S3 1968     | B2 |
| EIF3A 8661      | B2 |
| EIF3B 8662      | B2 |
| EIF3CL 728689   | B2 |
| EIF3C 8663      | B2 |
| EIF3E 3646      | B2 |
| EIF3G 8666      | B2 |
| EIF3IP1 442720  | B2 |
| EIF3I 8668      | B2 |
| EIF3J 8669      | B2 |
| EIF3K 27335     | B2 |
| EIF3M 10480     | B2 |
| EIF4A1 1973     | B2 |
| EIF4E1B 253314  | B2 |
| EIF4E2 9470     | B2 |
| EIF4EBP1 1978   | B2 |
| EIF4EBP3 8637   | B2 |
| EIF4ENIF1 56478 | B2 |
| EIF4G2 1982     | B2 |
| EIF4G3 8672     | B2 |
| EIF4H 7458      | B2 |
| EIF5A2 56648    | B2 |
| EIF5 1983       | B2 |
| ELAC2 60528     | B2 |
| ELAVL2 1993     | B2 |
| ELAVL3 1995     | B2 |
| ELAVL4 1996     | B2 |
| ELF1 1997       | B2 |
| ELF2 1998       | B2 |

|                 |    |
|-----------------|----|
| ELF3 1999       | B2 |
| ELFN1 392617    | B2 |
| ELFN2 114794    | B2 |
| ELK3 2004       | B2 |
| ELK4 2005       | B2 |
| ELL2 22936      | B2 |
| ELL 8178        | B2 |
| ELMO3 79767     | B2 |
| ELMOD1 55531    | B2 |
| ELN 2006        | B2 |
| ELOF1 84337     | B2 |
| ELOVL1 64834    | B2 |
| ELOVL2 54898    | B2 |
| ELOVL3 83401    | B2 |
| ELOVL4 6785     | B2 |
| ELOVL5 60481    | B2 |
| ELOVL6 79071    | B2 |
| ELOVL7 79993    | B2 |
| ELP2P 100131454 | B2 |
| ELP2 55250      | B2 |
| ELP3 55140      | B2 |
| ELP4 26610      | B2 |
| ELSPBP1 64100   | B2 |
| EMB 133418      | B2 |
| EMD 2010        | B2 |
| EME2 197342     | B2 |
| EMG1 10436      | B2 |
| EMID1 129080    | B2 |
| EMID2 136227    | B2 |
| EMILIN1 11117   | B2 |
| EML1 2009       | B2 |
| EML2 24139      | B2 |
| EML4 27436      | B2 |
| EML6 400954     | B2 |
| EMP3 2014       | B2 |
| EMR1 2015       | B2 |
| EMR2 30817      | B2 |
| EMR3 84658      | B2 |
| EMR4P 326342    | B2 |
| EMX1 2016       | B2 |
| EN1 2019        | B2 |
| EN2 2020        | B2 |
| ENAM 10117      | B2 |
| ENDOD1 23052    | B2 |
| ENDOG 2021      | B2 |
| ENHO 375704     | B2 |
| ENKUR 219670    | B2 |
| ENO1 2023       | B2 |
| ENO3 2027       | B2 |
| ENOSF1 55556    | B2 |
| ENOX1 55068     | B2 |

|                |    |
|----------------|----|
| ENOX2 10495    | B2 |
| ENPEP 2028     | B2 |
| ENPP1 5167     | B2 |
| ENPP3 5169     | B2 |
| ENPP4 22875    | B2 |
| ENPP5 59084    | B2 |
| ENPP7 339221   | B2 |
| ENTHD1 150350  | B2 |
| ENTPD1 953     | B2 |
| ENTPD2 954     | B2 |
| ENTPD3 956     | B2 |
| ENTPD4 9583    | B2 |
| ENTPD5 957     | B2 |
| ENTPD6 955     | B2 |
| ENTPD8 377841  | B2 |
| EOMES 8320     | B2 |
| EP300 2033     | B2 |
| EP400NL 347918 | B2 |
| EP400 57634    | B2 |
| EPB41L1 2036   | B2 |
| EPB41L3 23136  | B2 |
| EPB41L4A 64097 | B2 |
| EPB41L5 57669  | B2 |
| EPB41 2035     | B2 |
| EPGN 255324    | B2 |
| EPHA1 2041     | B2 |
| EPHA3 2042     | B2 |
| EPHA4 2043     | B2 |
| EPHA5 2044     | B2 |
| EPHA6 285220   | B2 |
| EPHA7 2045     | B2 |
| EPHA8 2046     | B2 |
| EPHB2 2048     | B2 |
| EPHB3 2049     | B2 |
| EPHB4 2050     | B2 |
| EPHX1 2052     | B2 |
| EPHX3 79852    | B2 |
| EPHX4 253152   | B2 |
| EPM2AIP1 9852  | B2 |
| EPM2A 7957     | B2 |
| EPN1 29924     | B2 |
| EPN2 22905     | B2 |
| EPOR 2057      | B2 |
| EPO 2056       | B2 |
| EPPK1 83481    | B2 |
| EPS8L2 64787   | B2 |
| EPS8L3 79574   | B2 |
| EPX 8288       | B2 |
| EPYC 1833      | B2 |
| ERAL1 26284    | B2 |
| ERAP2 64167    | B2 |

|              |    |
|--------------|----|
| ERAS 3266    | B2 |
| ERBB2 2064   | B2 |
| ERBB4 2066   | B2 |
| ERC1 23085   | B2 |
| ERC2 26059   | B2 |
| ERCC1 2067   | B2 |
| ERCC2 2068   | B2 |
| ERCC3 2071   | B2 |
| ERCC4 2072   | B2 |
| ERCC6 2074   | B2 |
| ERCC8 1161   | B2 |
| EREG 2069    | B2 |
| ERF 2077     | B2 |
| ERGIC3 51614 | B2 |
| ERI1 90459   | B2 |
| ERLIN1 10613 | B2 |
| ERLIN2 11160 | B2 |
| ERN1 2081    | B2 |
| ERN2 10595   | B2 |
| ERO1LB 56605 | B2 |
| ERP29 10961  | B2 |
| ERP44 23071  | B2 |
| ESCO1 114799 | B2 |
| ESF1 51575   | B2 |
| ESPNL 339768 | B2 |
| ESPNP 284729 | B2 |
| ESRRA 2101   | B2 |
| ESRRB 2103   | B2 |
| ESRRG 2104   | B2 |
| ESX1 80712   | B2 |
| ESYT3 83850  | B2 |
| ETAA1 54465  | B2 |
| ETF1 2107    | B2 |
| ETFA 2108    | B2 |
| ETHE1 23474  | B2 |
| ETNK1 55500  | B2 |
| ETV2 2116    | B2 |
| ETV3 2117    | B2 |
| ETV4 2118    | B2 |
| ETV6 2120    | B2 |
| EVC 2121     | B2 |
| EVI2A 2123   | B2 |
| EVI2B 2124   | B2 |
| EVI5L 115704 | B2 |
| EVPLL 645027 | B2 |
| EVX1 2128    | B2 |
| EWSR1 2130   | B2 |
| EXD1 161829  | B2 |
| EXD2 55218   | B2 |
| EXD3 54932   | B2 |
| EXOC1 55763  | B2 |



|                |    |
|----------------|----|
| EXOC2 55770    | B2 |
| EXOC3L2 90332  | B2 |
| EXOC3L 283849  | B2 |
| EXOC4 60412    | B2 |
| EXOC5 10640    | B2 |
| EXOC7 23265    | B2 |
| EXOC8 149371   | B2 |
| EXOG 9941      | B2 |
| EXOSC10 5394   | B2 |
| EXOSC2 23404   | B2 |
| EXOSC5 56915   | B2 |
| EXOSC6 118460  | B2 |
| EXOSC7 23016   | B2 |
| EXOSC8 11340   | B2 |
| EXOSC9 5393    | B2 |
| EXPH5 23086    | B2 |
| EXT1 2131      | B2 |
| EXT2 2132      | B2 |
| EXTL1 2134     | B2 |
| EYA1 2138      | B2 |
| EYA2 2139      | B2 |
| EYA3 2140      | B2 |
| EYA4 2070      | B2 |
| EYS 346007     | B2 |
| F11 2160       | B2 |
| F13A1 2162     | B2 |
| F13B 2165      | B2 |
| F2RL1 2150     | B2 |
| F2RL3 9002     | B2 |
| F2 2147        | B2 |
| F5 2153        | B2 |
| F8A1 8263      | B2 |
| F9 2158        | B2 |
| FA2H 79152     | B2 |
| FABP1 2168     | B2 |
| FABP2 2169     | B2 |
| FABP3 2170     | B2 |
| FABP5L3 220832 | B2 |
| FABP5 2171     | B2 |
| FABP6 2172     | B2 |
| FABP7 2173     | B2 |
| FABP9 646480   | B2 |
| FADS1 3992     | B2 |
| FADS2 9415     | B2 |
| FADS6 283985   | B2 |
| FAF1 11124     | B2 |
| FAHD2B 151313  | B2 |
| FAH 2184       | B2 |
| FAIM2 23017    | B2 |
| FAIM3 9214     | B2 |
| FAIM 55179     | B2 |

|                   |    |
|-------------------|----|
| FAM100A 124402    | B2 |
| FAM100B 283991    | B2 |
| FAM101A 144347    | B2 |
| FAM101B 359845    | B2 |
| FAM102B 284611    | B2 |
| FAM104B 90736     | B2 |
| FAM105A 54491     | B2 |
| FAM105B 90268     | B2 |
| FAM106A 80039     | B2 |
| FAM106C 100129396 | B2 |
| FAM107B 83641     | B2 |
| FAM108A1 81926    | B2 |
| FAM108B1 51104    | B2 |
| FAM109A 144717    | B2 |
| FAM109B 150368    | B2 |
| FAM110C 642273    | B2 |
| FAM111A 63901     | B2 |
| FAM113A 64773     | B2 |
| FAM113B 91523     | B2 |
| FAM114A2 10827    | B2 |
| FAM115A 9747      | B2 |
| FAM115C 285966    | B2 |
| FAM116A 201627    | B2 |
| FAM116B 414918    | B2 |
| FAM117B 150864    | B2 |
| FAM118A 55007     | B2 |
| FAM118B 79607     | B2 |
| FAM119A 151194    | B2 |
| FAM120AOS 158293  | B2 |
| FAM120B 84498     | B2 |
| FAM120C 54954     | B2 |
| FAM122C 159091    | B2 |
| FAM123A 219287    | B2 |
| FAM123B 139285    | B2 |
| FAM123C 205147    | B2 |
| FAM125A 93343     | B2 |
| FAM126B 285172    | B2 |
| FAM127B 26071     | B2 |
| FAM127C 441518    | B2 |
| FAM128B 80097     | B2 |
| FAM129B 64855     | B2 |
| FAM129C 199786    | B2 |
| FAM131B 9715      | B2 |
| FAM131C 348487    | B2 |
| FAM132A 388581    | B2 |
| FAM133A 286499    | B2 |
| FAM133B 257415    | B2 |
| FAM134A 79137     | B2 |
| FAM134B 54463     | B2 |
| FAM134C 162427    | B2 |
| FAM135B 51059     | B2 |

|                   |    |
|-------------------|----|
| FAM136B 387071    | B2 |
| FAM138B 654412    | B2 |
| FAM138D 677784    | B2 |
| FAM138E 100124412 | B2 |
| FAM149B1 317662   | B2 |
| FAM150A 389658    | B2 |
| FAM150B 285016    | B2 |
| FAM151A 338094    | B2 |
| FAM153B 202134    | B2 |
| FAM153C 653316    | B2 |
| FAM154A 158297    | B2 |
| FAM154B 283726    | B2 |
| FAM155A 728215    | B2 |
| FAM155B 27112     | B2 |
| FAM157A 728262    | B2 |
| FAM157B 100132403 | B2 |
| FAM159A 348378    | B2 |
| FAM160A1 729830   | B2 |
| FAM160B1 57700    | B2 |
| FAM161A 84140     | B2 |
| FAM161B 145483    | B2 |
| FAM163A 148753    | B2 |
| FAM163B 642968    | B2 |
| FAM164A 51101     | B2 |
| FAM164C 79696     | B2 |
| FAM165B 54065     | B2 |
| FAM166A 401565    | B2 |
| FAM166B 730112    | B2 |
| FAM167A 83648     | B2 |
| FAM167B 84734     | B2 |
| FAM168A 23201     | B2 |
| FAM169A 26049     | B2 |
| FAM169B 283777    | B2 |
| FAM170A 340069    | B2 |
| FAM171A2 284069   | B2 |
| FAM171B 165215    | B2 |
| FAM173B 134145    | B2 |
| FAM174A 345757    | B2 |
| FAM175B 23172     | B2 |
| FAM176A 84141     | B2 |
| FAM176B 55194     | B2 |
| FAM177A1 283635   | B2 |
| FAM177B 400823    | B2 |
| FAM178A 55719     | B2 |
| FAM178B 51252     | B2 |
| FAM179A 165186    | B2 |
| FAM179B 23116     | B2 |
| FAM181B 220382    | B2 |
| FAM182A 284800    | B2 |
| FAM182B 728882    | B2 |
| FAM183A 440585    | B2 |

|                  |    |
|------------------|----|
| FAM183B 340286   | B2 |
| FAM184B 27146    | B2 |
| FAM185A 222234   | B2 |
| FAM186A 121006   | B2 |
| FAM187B 148109   | B2 |
| FAM188A 80013    | B2 |
| FAM188B 84182    | B2 |
| FAM189A1 23359   | B2 |
| FAM18B2 201158   | B2 |
| FAM18B 51030     | B2 |
| FAM190A 401145   | B2 |
| FAM192A 80011    | B2 |
| FAM193A 8603     | B2 |
| FAM194A 131831   | B2 |
| FAM194B 220081   | B2 |
| FAM195B 348262   | B2 |
| FAM196A 642938   | B2 |
| FAM198A 729085   | B2 |
| FAM198B 51313    | B2 |
| FAM19A2 338811   | B2 |
| FAM19A3 284467   | B2 |
| FAM19A4 151647   | B2 |
| FAM19A5 25817    | B2 |
| FAM200A 221786   | B2 |
| FAM20A 54757     | B2 |
| FAM20B 9917      | B2 |
| FAM20C 56975     | B2 |
| FAM21A 387680    | B2 |
| FAM21B 55747     | B2 |
| FAM22A 728118    | B2 |
| FAM22D 728130    | B2 |
| FAM22F 54754     | B2 |
| FAM22G 441457    | B2 |
| FAM24B 196792    | B2 |
| FAM25A 643161    | B2 |
| FAM25B 100132929 | B2 |
| FAM26E 254228    | B2 |
| FAM26F 441168    | B2 |
| FAM27A 548321    | B2 |
| FAM27B 100133121 | B2 |
| FAM27C 100132948 | B2 |
| FAM32A 26017     | B2 |
| FAM35A 54537     | B2 |
| FAM35B2 439965   | B2 |
| FAM35B 414241    | B2 |
| FAM38A 9780      | B2 |
| FAM38B 63895     | B2 |
| FAM3A 60343      | B2 |
| FAM3B 54097      | B2 |
| FAM3C 10447      | B2 |
| FAM3D 131177     | B2 |

|                   |    |
|-------------------|----|
| FAM40A 85369      | B2 |
| FAM40B 57464      | B2 |
| FAM41C 284593     | B2 |
| FAM43B 163933     | B2 |
| FAM45A 404636     | B2 |
| FAM45B 55855      | B2 |
| FAM46A 55603      | B2 |
| FAM46B 115572     | B2 |
| FAM46C 54855      | B2 |
| FAM46D 169966     | B2 |
| FAM47A 158724     | B2 |
| FAM47B 170062     | B2 |
| FAM47C 442444     | B2 |
| FAM48A 55578      | B2 |
| FAM48B1 100130302 | B2 |
| FAM48B2 170067    | B2 |
| FAM50A 9130       | B2 |
| FAM50B 26240      | B2 |
| FAM53A 152877     | B2 |
| FAM53B 9679       | B2 |
| FAM55A 120400     | B2 |
| FAM55B 120406     | B2 |
| FAM55C 91775      | B2 |
| FAM57A 79850      | B2 |
| FAM57B 83723      | B2 |
| FAM58A 92002      | B2 |
| FAM58B 339521     | B2 |
| FAM59A 64762      | B2 |
| FAM5B 57795       | B2 |
| FAM5C 339479      | B2 |
| FAM60A 58516      | B2 |
| FAM63A 55793      | B2 |
| FAM63B 54629      | B2 |
| FAM65B 9750       | B2 |
| FAM65C 140876     | B2 |
| FAM66C 440078     | B2 |
| FAM66D 100132923  | B2 |
| FAM66E 100132103  | B2 |
| FAM69B 138311     | B2 |
| FAM69C 125704     | B2 |
| FAM70B 348013     | B2 |
| FAM71A 149647     | B2 |
| FAM71B 153745     | B2 |
| FAM71C 196472     | B2 |
| FAM71E1 112703    | B2 |
| FAM71E2 284418    | B2 |
| FAM71F1 84691     | B2 |
| FAM71F2 346653    | B2 |
| FAM73A 374986     | B2 |
| FAM73B 84895      | B2 |
| FAM74A1 401507    | B2 |

|                |    |
|----------------|----|
| FAM74A3 728495 | B2 |
| FAM74A4 401508 | B2 |
| FAM75A2 642265 | B2 |
| FAM75A3 727830 | B2 |
| FAM75A5 727905 | B2 |
| FAM75A6 389730 | B2 |
| FAM75C1 441452 | B2 |
| FAM76B 143684  | B2 |
| FAM78A 286336  | B2 |
| FAM78B 149297  | B2 |
| FAM7A3 89837   | B2 |
| FAM81A 145773  | B2 |
| FAM81B 153643  | B2 |
| FAM82A2 55177  | B2 |
| FAM82B 51115   | B2 |
| FAM83A 84985   | B2 |
| FAM83B 222584  | B2 |
| FAM83C 128876  | B2 |
| FAM83E 54854   | B2 |
| FAM83F 113828  | B2 |
| FAM83G 644815  | B2 |
| FAM84A 151354  | B2 |
| FAM84B 157638  | B2 |
| FAM86B1 85002  | B2 |
| FAM86B2 653333 | B2 |
| FAM89B 23625   | B2 |
| FAM8A1 51439   | B2 |
| FAM90A1 55138  | B2 |
| FAM90A7 441317 | B2 |
| FAM92A1 137392 | B2 |
| FAM92A3 403315 | B2 |
| FAM92B 339145  | B2 |
| FAM96B 51647   | B2 |
| FAM98A 25940   | B2 |
| FAM98B 283742  | B2 |
| FAM98C 147965  | B2 |
| FAM9A 171482   | B2 |
| FAM9B 171483   | B2 |
| FAM9C 171484   | B2 |
| FANCC 2176     | B2 |
| FANCE 2178     | B2 |
| FANCL 55120    | B2 |
| FANCM 57697    | B2 |
| FANK1 92565    | B2 |
| FAR1 84188     | B2 |
| FAR2 55711     | B2 |
| FARP2 9855     | B2 |
| FARS2 10667    | B2 |
| FASLG 356      | B2 |
| FASN 2194      | B2 |
| FASTKD1 79675  | B2 |

|               |    |
|---------------|----|
| FASTKD2 22868 | B2 |
| FASTKD5 60493 | B2 |
| FASTK 10922   | B2 |
| FAS 355       | B2 |
| FAT3 120114   | B2 |
| FATE1 89885   | B2 |
| FAU 2197      | B2 |
| FBF1 85302    | B2 |
| FBLIM1 54751  | B2 |
| FBLL1 345630  | B2 |
| FBLN1 2192    | B2 |
| FBL 2091      | B2 |
| FBN1 2200     | B2 |
| FBN2 2201     | B2 |
| FBN3 84467    | B2 |
| FBP2 8789     | B2 |
| FBRSL1 57666  | B2 |
| FBXL12 54850  | B2 |
| FBXL13 222235 | B2 |
| FBXL15 79176  | B2 |
| FBXL17 64839  | B2 |
| FBXL18 80028  | B2 |
| FBXL20 84961  | B2 |
| FBXL21 26223  | B2 |
| FBXL2 25827   | B2 |
| FBXL3 26224   | B2 |
| FBXL4 26235   | B2 |
| FBXL7 23194   | B2 |
| FBXL8 55336   | B2 |
| FBXO10 26267  | B2 |
| FBXO11 80204  | B2 |
| FBXO15 201456 | B2 |
| FBXO18 84893  | B2 |
| FBXO21 23014  | B2 |
| FBXO24 26261  | B2 |
| FBXO25 26260  | B2 |
| FBXO27 126433 | B2 |
| FBXO2 26232   | B2 |
| FBXO30 84085  | B2 |
| FBXO32 114907 | B2 |
| FBXO34 55030  | B2 |
| FBXO36 130888 | B2 |
| FBXO38 81545  | B2 |
| FBXO39 162517 | B2 |
| FBXO3 26273   | B2 |
| FBXO40 51725  | B2 |
| FBXO44 93611  | B2 |
| FBXO47 494188 | B2 |
| FBXO4 26272   | B2 |
| FBXO7 25793   | B2 |
| FBXO9 26268   | B2 |

|                |    |
|----------------|----|
| FBXW10 10517   | B2 |
| FBXW11 23291   | B2 |
| FBXW12 285231  | B2 |
| FBXW2 26190    | B2 |
| FBXW4 6468     | B2 |
| FBXW5 54461    | B2 |
| FBXW8 26259    | B2 |
| FBXW9 84261    | B2 |
| FCAMR 83953    | B2 |
| FCAR 2204      | B2 |
| FCER1A 2205    | B2 |
| FCER1G 2207    | B2 |
| FCER2 2208     | B2 |
| FCF1 51077     | B2 |
| FCGBP 8857     | B2 |
| FCGR2A 2212    | B2 |
| FCGR2B 2213    | B2 |
| FCGR2C 9103    | B2 |
| FCGR3B 2215    | B2 |
| FCHO1 23149    | B2 |
| FCHO2 115548   | B2 |
| FCHSD1 89848   | B2 |
| FCHSD2 9873    | B2 |
| FCN1 2219      | B2 |
| FCN2 2220      | B2 |
| FCN3 8547      | B2 |
| FCRL1 115350   | B2 |
| FCRL2 79368    | B2 |
| FCRL3 115352   | B2 |
| FCRL4 83417    | B2 |
| FCRL5 83416    | B2 |
| FCRL6 343413   | B2 |
| FCRLA 84824    | B2 |
| FCRLB 127943   | B2 |
| FDFT1 2222     | B2 |
| FDPSL2A 619190 | B2 |
| FDX1L 112812   | B2 |
| FDX1 2230      | B2 |
| FDXACB1 91893  | B2 |
| FECH 2235      | B2 |
| FEM1A 55527    | B2 |
| FEM1B 10116    | B2 |
| FEM1C 56929    | B2 |
| FER1L4 80307   | B2 |
| FER1L5 90342   | B2 |
| FER1L6 654463  | B2 |
| FERD3L 222894  | B2 |
| FERMT1 55612   | B2 |
| FERMT3 83706   | B2 |
| FETUB 26998    | B2 |
| FEV 54738      | B2 |



|              |    |
|--------------|----|
| FEZF1 389549 | B2 |
| FEZF2 55079  | B2 |
| FFAR1 2864   | B2 |
| FFAR2 2867   | B2 |
| FFAR3 2865   | B2 |
| FGA 2243     | B2 |
| FGB 2244     | B2 |
| FGD2 221472  | B2 |
| FGF11 2256   | B2 |
| FGF12 2257   | B2 |
| FGF13 2258   | B2 |
| FGF14 2259   | B2 |
| FGF16 8823   | B2 |
| FGF18 8817   | B2 |
| FGF19 9965   | B2 |
| FGF20 26281  | B2 |
| FGF21 26291  | B2 |
| FGF22 27006  | B2 |
| FGF23 8074   | B2 |
| FGF3 2248    | B2 |
| FGF4 2249    | B2 |
| FGF5 2250    | B2 |
| FGFBP1 9982  | B2 |
| FGFBP2 83888 | B2 |
| FGFR2 2263   | B2 |
| FGFR3 2261   | B2 |
| FGFR4 2264   | B2 |
| FGFRL1 53834 | B2 |
| FGGY 55277   | B2 |
| FGG 2266     | B2 |
| FGL1 2267    | B2 |
| FGR 2268     | B2 |
| FHIT 2272    | B2 |
| FHL1 2273    | B2 |
| FHL2 2274    | B2 |
| FHL3 2275    | B2 |
| FHOD1 29109  | B2 |
| FIBCD1 84929 | B2 |
| FIBIN 387758 | B2 |
| FICD 11153   | B2 |
| FIG4 9896    | B2 |
| FIGLA 344018 | B2 |
| FIGNL1 63979 | B2 |
| FILIP1 27145 | B2 |
| FIS1 51024   | B2 |
| FITM1 161247 | B2 |
| FITM2 128486 | B2 |
| FIZ1 84922   | B2 |
| FJX1 24147   | B2 |
| FKBP11 51303 | B2 |
| FKBP14 55033 | B2 |

|                    |    |
|--------------------|----|
| FKBP15 23307       | B2 |
| FKBP1AP1 2282      | B2 |
| FKBP1A 2280        | B2 |
| FKBP2 2286         | B2 |
| FKBP5 2289         | B2 |
| FKBP6 8468         | B2 |
| FKBP7 51661        | B2 |
| FKBP8 23770        | B2 |
| FKBP9L 360132      | B2 |
| FKBP9 11328        | B2 |
| FKRP 79147         | B2 |
| FKSG29 100131561   | B2 |
| FKSG83 83954       | B2 |
| FLG2 388698        | B2 |
| FLII 2314          | B2 |
| FLJ10213 55096     | B2 |
| FLJ10661 286042    | B2 |
| FLJ11235 54508     | B2 |
| FLJ12825 440101    | B2 |
| FLJ13224 79857     | B2 |
| FLJ14107 80094     | B2 |
| FLJ16779 100192386 | B2 |
| FLJ22536 401237    | B2 |
| FLJ23867 200058    | B2 |
| FLJ25328 148231    | B2 |
| FLJ25758 497049    | B2 |
| FLJ30679 146512    | B2 |
| FLJ32063 150538    | B2 |
| FLJ33630 644873    | B2 |
| FLJ34503 285759    | B2 |
| FLJ35220 284131    | B2 |
| FLJ35390 255031    | B2 |
| FLJ35776 649446    | B2 |
| FLJ36000 284124    | B2 |
| FLJ36031 168455    | B2 |
| FLJ37201 283011    | B2 |
| FLJ37307 283521    | B2 |
| FLJ37453 729614    | B2 |
| FLJ39609 100130417 | B2 |
| FLJ39739 388685    | B2 |
| FLJ40292 643210    | B2 |
| FLJ40330 645784    | B2 |
| FLJ40504 284085    | B2 |
| FLJ40852 285962    | B2 |
| FLJ41941 100192420 | B2 |
| FLJ42289 388182    | B2 |
| FLJ42393 401105    | B2 |
| FLJ42627 645644    | B2 |
| FLJ42709 441094    | B2 |
| FLJ43859 389761    | B2 |
| FLJ43860 389690    | B2 |

|                 |    |
|-----------------|----|
| FLJ43950 347127 | B2 |
| FLJ44054 643365 | B2 |
| FLJ44082 389762 | B2 |
| FLJ44606 401207 | B2 |
| FLJ45079 400624 | B2 |
| FLJ45244 400242 | B2 |
| FLJ45445 399844 | B2 |
| FLJ46111 283102 | B2 |
| FLJ46321 389763 | B2 |
| FLJ90757 440465 | B2 |
| FLNA 2316       | B2 |
| FLNB 2317       | B2 |
| FLNC 2318       | B2 |
| FLOT1 10211     | B2 |
| FLOT2 2319      | B2 |
| FLRT1 23769     | B2 |
| FLRT3 23767     | B2 |
| FLT1 2321       | B2 |
| FLT3 2322       | B2 |
| FLVCR2 55640    | B2 |
| FLYWCH1 84256   | B2 |
| FMN1 342184     | B2 |
| FMN2 56776      | B2 |
| FMNL1 752       | B2 |
| FMNL3 91010     | B2 |
| FMO1 2326       | B2 |
| FMO5 2330       | B2 |
| FMO6P 388714    | B2 |
| FMO9P 116123    | B2 |
| FMR1NB 158521   | B2 |
| FMR1 2332       | B2 |
| FN3KRP 79672    | B2 |
| FN3K 64122      | B2 |
| FNBP1L 54874    | B2 |
| FNBP1 23048     | B2 |
| FNBP4 23360     | B2 |
| FNDC3B 64778    | B2 |
| FNDC5 252995    | B2 |
| FNDC7 163479    | B2 |
| FNDC8 54752     | B2 |
| FNIP1 96459     | B2 |
| FNTA 2339       | B2 |
| FNTB 2342       | B2 |
| FOLH1B 219595   | B2 |
| FOLH1 2346      | B2 |
| FOLR1 2348      | B2 |
| FOLR3 2352      | B2 |
| FOLR4 390243    | B2 |
| FOSL1 8061      | B2 |
| FOSL2 2355      | B2 |
| FOXA2 3170      | B2 |

|                   |    |
|-------------------|----|
| FOXA3 3171        | B2 |
| FOXB1 27023       | B2 |
| FOXB2 442425      | B2 |
| FOXC1 2296        | B2 |
| FOXC2 2303        | B2 |
| FOXD1 2297        | B2 |
| FOXD3 27022       | B2 |
| FOXD4L2 100036519 | B2 |
| FOXD4L3 286380    | B2 |
| FOXD4L5 653427    | B2 |
| FOXD4L6 653404    | B2 |
| FOXD4 2298        | B2 |
| FOXE1 2304        | B2 |
| FOXE3 2301        | B2 |
| FOXF1 2294        | B2 |
| FOXF2 2295        | B2 |
| FOXG1 2290        | B2 |
| FOXI1 2299        | B2 |
| FOXI2 399823      | B2 |
| FOXI3 344167      | B2 |
| FOXJ1 2302        | B2 |
| FOXJ2 55810       | B2 |
| FOXJ3 22887       | B2 |
| FOXK1 221937      | B2 |
| FOXL1 2300        | B2 |
| FOXL2 668         | B2 |
| FOXN1 8456        | B2 |
| FOXN4 121643      | B2 |
| FOXO3B 2310       | B2 |
| FOXO3 2309        | B2 |
| FOXP1 27086       | B2 |
| FOXP4 116113      | B2 |
| FOXQ1 94234       | B2 |
| FOXR1 283150      | B2 |
| FOXR2 139628      | B2 |
| FOXRED1 55572     | B2 |
| FPGS 2356         | B2 |
| FPGT 8790         | B2 |
| FPR1 2357         | B2 |
| FPR2 2358         | B2 |
| FPR3 2359         | B2 |
| FRAS1 80144       | B2 |
| FRAT1 10023       | B2 |
| FREM2 341640      | B2 |
| FRG2B 441581      | B2 |
| FRG2C 100288801   | B2 |
| FRG2 448831       | B2 |
| FRMD5 84978       | B2 |
| FRMD6 122786      | B2 |
| FRMD7 90167       | B2 |
| FRMD8 83786       | B2 |

|                 |    |
|-----------------|----|
| FRMPD2L1 728798 | B2 |
| FRMPD2 143162   | B2 |
| FRRS1 391059    | B2 |
| FRS2 10818      | B2 |
| FRS3 10817      | B2 |
| FRYL 285527     | B2 |
| FRZB 2487       | B2 |
| FSCB 84075      | B2 |
| FSCN1 6624      | B2 |
| FSCN2 25794     | B2 |
| FSCN3 29999     | B2 |
| FSD1L 83856     | B2 |
| FSD1 79187      | B2 |
| FSD2 123722     | B2 |
| FSHB 2488       | B2 |
| FSHR 2492       | B2 |
| FSTL3 10272     | B2 |
| FSTL4 23105     | B2 |
| FSTL5 56884     | B2 |
| FST 10468       | B2 |
| FTCD 10841      | B2 |
| FTH1 2495       | B2 |
| FTHL3 2498      | B2 |
| FTL 2512        | B2 |
| FTMT 94033      | B2 |
| FTSJ3 117246    | B2 |
| FTSJD1 55783    | B2 |
| FTSJD2 23070    | B2 |
| FUBP3 8939      | B2 |
| FUCA1 2517      | B2 |
| FUCA2 2519      | B2 |
| FUK 197258      | B2 |
| FUNDC2P2 388965 | B2 |
| FUNDC2 65991    | B2 |
| FURIN 5045      | B2 |
| FUT11 170384    | B2 |
| FUT1 2523       | B2 |
| FUT3 2525       | B2 |
| FUT5 2527       | B2 |
| FUT6 2528       | B2 |
| FUT7 2529       | B2 |
| FUT9 10690      | B2 |
| FUZ 80199       | B2 |
| FXC1 26515      | B2 |
| FXN 2395        | B2 |
| FXR1 8087       | B2 |
| FXR2 9513       | B2 |
| FXYD4 53828     | B2 |
| FXYD5 53827     | B2 |
| FXYD7 53822     | B2 |
| FYB 2533        | B2 |

|                   |    |
|-------------------|----|
| FYCO1 79443       | B2 |
| FYTTD1 84248      | B2 |
| FZD10 11211       | B2 |
| FZD1 8321         | B2 |
| FZD3 7976         | B2 |
| FZD6 8323         | B2 |
| FZD8 8325         | B2 |
| FZD9 8326         | B2 |
| FZR1 51343        | B2 |
| G2E3 55632        | B2 |
| G3BP2 9908        | B2 |
| G6PC2 57818       | B2 |
| G6PC 2538         | B2 |
| G6PD 2539         | B2 |
| GAA 2548          | B2 |
| GAB1 2549         | B2 |
| GAB2 9846         | B2 |
| GAB4 128954       | B2 |
| GABARAPL2 11345   | B2 |
| GABARAP 11337     | B2 |
| GABBR2 9568       | B2 |
| GABPB2 126626     | B2 |
| GABRA1 2554       | B2 |
| GABRA3 2556       | B2 |
| GABRA5 2558       | B2 |
| GABRB1 2560       | B2 |
| GABRB2 2561       | B2 |
| GABRB3 2562       | B2 |
| GABRG2 2566       | B2 |
| GABRG3 2567       | B2 |
| GABRP 2568        | B2 |
| GABRQ 55879       | B2 |
| GABRR1 2569       | B2 |
| GABRR2 2570       | B2 |
| GABRR3 200959     | B2 |
| GAD1 2571         | B2 |
| GAD2 2572         | B2 |
| GADD45A 1647      | B2 |
| GADD45B 4616      | B2 |
| GADD45GIP1 90480  | B2 |
| GADD45G 10912     | B2 |
| GADL1 339896      | B2 |
| GAGE10 643832     | B2 |
| GAGE12D 100132399 | B2 |
| GAGE12J 729396    | B2 |
| GAGE1 2543        | B2 |
| GAGE2A 729447     | B2 |
| GAGE4 2576        | B2 |
| GAGE8 100101629   | B2 |
| GAL3ST1 9514      | B2 |
| GAL3ST2 64090     | B2 |

|                |    |
|----------------|----|
| GALC 2581      | B2 |
| GALK1 2584     | B2 |
| GALK2 2585     | B2 |
| GALM 130589    | B2 |
| GALNT13 114805 | B2 |
| GALNT14 79623  | B2 |
| GALNT2 2590    | B2 |
| GALNT3 2591    | B2 |
| GALNT4 8693    | B2 |
| GALNT5 11227   | B2 |
| GALNT8 26290   | B2 |
| GALNT9 50614   | B2 |
| GALNTL4 374378 | B2 |
| GALNTL6 442117 | B2 |
| GALP 85569     | B2 |
| GALR2 8811     | B2 |
| GALR3 8484     | B2 |
| GAL 51083      | B2 |
| GAMT 2593      | B2 |
| GAN 8139       | B2 |
| GAP43 2596     | B2 |
| GAPDHS 26330   | B2 |
| GAPDH 2597     | B2 |
| GAPVD1 26130   | B2 |
| GAR1 54433     | B2 |
| GARNL3 84253   | B2 |
| GAS2L1 10634   | B2 |
| GAS5 60674     | B2 |
| GAS8 2622      | B2 |
| GAST 2520      | B2 |
| GATA1 2623     | B2 |
| GATA2 2624     | B2 |
| GATA4 2626     | B2 |
| GATA5 140628   | B2 |
| GATAD1 57798   | B2 |
| GATAD2B 57459  | B2 |
| GATC 283459    | B2 |
| GATM 2628      | B2 |
| GATSL1 389523  | B2 |
| GATSL2 729438  | B2 |
| GATSL3 652968  | B2 |
| GATS 352954    | B2 |
| GBA2 57704     | B2 |
| GBA3 57733     | B2 |
| GBAS 2631      | B2 |
| GBGT1 26301    | B2 |
| GBP1 2633      | B2 |
| GBP2 2634      | B2 |
| GBP3 2635      | B2 |
| GBP4 115361    | B2 |
| GBP5 115362    | B2 |

|                 |    |
|-----------------|----|
| GBP6 163351     | B2 |
| GBP7 388646     | B2 |
| GBX1 2636       | B2 |
| GBX2 2637       | B2 |
| GCA 25801       | B2 |
| GCC1 79571      | B2 |
| GCC2 9648       | B2 |
| GCDH 2639       | B2 |
| GCET2 257144    | B2 |
| GCFC1 94104     | B2 |
| GCGR 2642       | B2 |
| GCG 2641        | B2 |
| GCHFR 2644      | B2 |
| GCKR 2646       | B2 |
| GCK 2645        | B2 |
| GCLC 2729       | B2 |
| GCLM 2730       | B2 |
| GCM1 8521       | B2 |
| GCM2 9247       | B2 |
| GCN1L1 10985    | B2 |
| GCNT1 2650      | B2 |
| GCNT2 2651      | B2 |
| GCNT3 9245      | B2 |
| GCNT7 140687    | B2 |
| GCSH 2653       | B2 |
| GC 2638         | B2 |
| GDAP1L1 78997   | B2 |
| GDAP1 54332     | B2 |
| GDAP2 54834     | B2 |
| GDA 9615        | B2 |
| GDEP 118425     | B2 |
| GDF1 10220      | B2 |
| GDF15 9518      | B2 |
| GDF1 2657       | B2 |
| GDF2 2658       | B2 |
| GDF3 9573       | B2 |
| GDF5 8200       | B2 |
| GDF6 392255     | B2 |
| GDF7 151449     | B2 |
| GDF9 2661       | B2 |
| GDNF 2668       | B2 |
| GDPD1 284161    | B2 |
| GDPD2 54857     | B2 |
| GDPD3 79153     | B2 |
| GDPD4 220032    | B2 |
| GEMIN5 25929    | B2 |
| GEMIN8P4 492303 | B2 |
| GEMIN8 54960    | B2 |
| GET4 51608      | B2 |
| GFI1B 8328      | B2 |
| GFI1 2672       | B2 |



|                  |    |
|------------------|----|
| GFM2 84340       | B2 |
| GFOD2 81577      | B2 |
| GFPT1 2673       | B2 |
| GFPT2 9945       | B2 |
| GFRA1 2674       | B2 |
| GFRA3 2676       | B2 |
| GFRAL 389400     | B2 |
| GGA1 26088       | B2 |
| GGA2 23062       | B2 |
| GGA3 23163       | B2 |
| GGCX 2677        | B2 |
| GGH 8836         | B2 |
| GGNBP1 449520    | B2 |
| GGNBP2 79893     | B2 |
| GGN 199720       | B2 |
| GGT1 2678        | B2 |
| GGT3P 2679       | B2 |
| GGT5 2687        | B2 |
| GGT6 124975      | B2 |
| GGT8P 645367     | B2 |
| GGTLC1 92086     | B2 |
| GGTLC2 91227     | B2 |
| GH1 2688         | B2 |
| GH2 2689         | B2 |
| GHDC 84514       | B2 |
| GHITM 27069      | B2 |
| GHRHR 2692       | B2 |
| GHRH 2691        | B2 |
| GHRLOS 100126793 | B2 |
| GHRL 51738       | B2 |
| GHSR 2693        | B2 |
| GIF 2694         | B2 |
| GIGYF2 26058     | B2 |
| GIMAP2 26157     | B2 |
| GIN1 54826       | B2 |
| GIPC3 126326     | B2 |
| GIPR 2696        | B2 |
| GIP 2695         | B2 |
| GIT1 28964       | B2 |
| GJA10 84694      | B2 |
| GJA1 2697        | B2 |
| GJA4 2701        | B2 |
| GJA5 2702        | B2 |
| GJA8 2703        | B2 |
| GJA9 81025       | B2 |
| GJB1 2705        | B2 |
| GJB3 2707        | B2 |
| GJB4 127534      | B2 |
| GJB5 2709        | B2 |
| GJB6 10804       | B2 |
| GJB7 375519      | B2 |

|                 |    |
|-----------------|----|
| GJC1 10052      | B2 |
| GJC3 349149     | B2 |
| GJD4 219770     | B2 |
| GK5 256356      | B2 |
| GKAP1 80318     | B2 |
| GKN1 56287      | B2 |
| GKN2 200504     | B2 |
| GLA 2717        | B2 |
| GLB1L2 89944    | B2 |
| GLB1L3 112937   | B2 |
| GLB1L 79411     | B2 |
| GLCCI1 113263   | B2 |
| GLCE 26035      | B2 |
| GLDC 2731       | B2 |
| GLI2 2736       | B2 |
| GLI3 2737       | B2 |
| GLI4 2738       | B2 |
| GLIPR1L1 256710 | B2 |
| GLIPR1L2 144321 | B2 |
| GLIPR1 11010    | B2 |
| GLIPR2 152007   | B2 |
| GLIS1 148979    | B2 |
| GLMN 11146      | B2 |
| GLOD4 51031     | B2 |
| GLOD5 392465    | B2 |
| GLP1R 2740      | B2 |
| GLRA1 2741      | B2 |
| GLRA2 2742      | B2 |
| GLRA3 8001      | B2 |
| GLRB 2743       | B2 |
| GLRX5 51218     | B2 |
| GLRX 2745       | B2 |
| GLS2 27165      | B2 |
| GLS 2744        | B2 |
| GLT1D1 144423   | B2 |
| GLT8D1 55830    | B2 |
| GLT8D2 83468    | B2 |
| GLTPD1 80772    | B2 |
| GLTPD2 388323   | B2 |
| GLTP 51228      | B2 |
| GLTSCR1 29998   | B2 |
| GLUD1 2746      | B2 |
| GLUD2 2747      | B2 |
| GLUL 2752       | B2 |
| GLYATL1 92292   | B2 |
| GLYATL2 219970  | B2 |
| GLYATL3 389396  | B2 |
| GLYCAM1 644076  | B2 |
| GLYCTK 132158   | B2 |
| GM2A 2760       | B2 |
| GMCL1L 64396    | B2 |

|                 |    |
|-----------------|----|
| GMCL1 64395     | B2 |
| GMEB1 10691     | B2 |
| GMEB2 26205     | B2 |
| GMFB 2764       | B2 |
| GMFG 9535       | B2 |
| GML 2765        | B2 |
| GMNN 51053      | B2 |
| GMPR2 51292     | B2 |
| GMPR 2766       | B2 |
| GNA12 2768      | B2 |
| GNA13 10672     | B2 |
| GNA14 9630      | B2 |
| GNA15 2769      | B2 |
| GNAI2 2771      | B2 |
| GNAO1 2775      | B2 |
| GNASAS 149775   | B2 |
| GNAS 2778       | B2 |
| GNAT1 2779      | B2 |
| GNAT2 2780      | B2 |
| GNAT3 346562    | B2 |
| GNB1L 54584     | B2 |
| GNB1 2782       | B2 |
| GNB2L1 10399    | B2 |
| GNB3 2784       | B2 |
| GNB4 59345      | B2 |
| GNG10 2790      | B2 |
| GNG13 51764     | B2 |
| GNG3 2785       | B2 |
| GNG4 2786       | B2 |
| GNG8 94235      | B2 |
| GNGT1 2792      | B2 |
| GNGT2 2793      | B2 |
| GNL3 26354      | B2 |
| GNLY 10578      | B2 |
| GNMT 27232      | B2 |
| GNPDA2 132789   | B2 |
| GNPTAB 79158    | B2 |
| GNPTG 84572     | B2 |
| GNRH2 2797      | B2 |
| GNRHR2 114814   | B2 |
| GNRHR 2798      | B2 |
| GNS 2799        | B2 |
| GOLGA1 2800     | B2 |
| GOLGA2B 55592   | B2 |
| GOLGA3 2802     | B2 |
| GOLGA4 2803     | B2 |
| GOLGA6A 342096  | B2 |
| GOLGA6B 55889   | B2 |
| GOLGA6C 653641  | B2 |
| GOLGA6L1 283767 | B2 |
| GOLGA6L6 727832 | B2 |

|                    |    |
|--------------------|----|
| GOLGA6L9 440295    | B2 |
| GOLGA7B 401647     | B2 |
| GOLGA7 51125       | B2 |
| GOLGA8DP 100132979 | B2 |
| GOLGA8E 390535     | B2 |
| GOLGA8G 283768     | B2 |
| GOLGB1 2804        | B2 |
| GOLIM4 27333       | B2 |
| GOPC 57120         | B2 |
| GOSR1 9527         | B2 |
| GOSR2 9570         | B2 |
| GOT1L1 137362      | B2 |
| GOT1 2805          | B2 |
| GOT2 2806          | B2 |
| GP1BA 2811         | B2 |
| GP2 2813           | B2 |
| GP5 2814           | B2 |
| GP6 51206          | B2 |
| GP9 2815           | B2 |
| GPA33 10223        | B2 |
| GPAT2 150763       | B2 |
| GPATCH1 55094      | B2 |
| GPATCH3 63906      | B2 |
| GPATCH8 23131      | B2 |
| GPBP1L1 60313      | B2 |
| GPBP1 65056        | B2 |
| GPC1 2817          | B2 |
| GPC2 221914        | B2 |
| GPC5 2262          | B2 |
| GPC6 10082         | B2 |
| GPCPD1 56261       | B2 |
| GPD1L 23171        | B2 |
| GPD2 2820          | B2 |
| GPHA2 170589       | B2 |
| GPHN 10243         | B2 |
| GPI 2821           | B2 |
| GPKOW 27238        | B2 |
| GPM6A 2823         | B2 |
| GPN2 54707         | B2 |
| GPN3 51184         | B2 |
| GPNMB 10457        | B2 |
| GPR101 83550       | B2 |
| GPR107 57720       | B2 |
| GPR108 56927       | B2 |
| GPR110 266977      | B2 |
| GPR111 222611      | B2 |
| GPR114 221188      | B2 |
| GPR115 221393      | B2 |
| GPR123 84435       | B2 |
| GPR126 57211       | B2 |
| GPR128 84873       | B2 |

|               |    |
|---------------|----|
| GPR12 2835    | B2 |
| GPR132 29933  | B2 |
| GPR139 124274 | B2 |
| GPR141 353345 | B2 |
| GPR150 285601 | B2 |
| GPR151 134391 | B2 |
| GPR152 390212 | B2 |
| GPR153 387509 | B2 |
| GPR155 151556 | B2 |
| GPR156 165829 | B2 |
| GPR157 80045  | B2 |
| GPR158 57512  | B2 |
| GPR15 2838    | B2 |
| GPR161 23432  | B2 |
| GPR162 27239  | B2 |
| GPR171 29909  | B2 |
| GPR172B 55065 | B2 |
| GPR173 54328  | B2 |
| GPR174 84636  | B2 |
| GPR176 11245  | B2 |
| GPR179 440435 | B2 |
| GPR180 160897 | B2 |
| GPR183 1880   | B2 |
| GPR18 2841    | B2 |
| GPR1 2825     | B2 |
| GPR20 2843    | B2 |
| GPR21 2844    | B2 |
| GPR22 2845    | B2 |
| GPR25 2848    | B2 |
| GPR26 2849    | B2 |
| GPR27 2850    | B2 |
| GPR31 2853    | B2 |
| GPR32 2854    | B2 |
| GPR35 2859    | B2 |
| GPR37L1 9283  | B2 |
| GPR37 2861    | B2 |
| GPR39 2863    | B2 |
| GPR3 2827     | B2 |
| GPR4 2828     | B2 |
| GPR50 9248    | B2 |
| GPR52 9293    | B2 |
| GPR55 9290    | B2 |
| GPR56 9289    | B2 |
| GPR61 83873   | B2 |
| GPR63 81491   | B2 |
| GPR64 10149   | B2 |
| GPR65 8477    | B2 |
| GPR6 2830     | B2 |
| GPR78 27201   | B2 |
| GPR82 27197   | B2 |
| GPR83 10888   | B2 |

|                |    |
|----------------|----|
| GPR85 54329    | B2 |
| GPR87 53836    | B2 |
| GPR89B 51463   | B2 |
| GPR89C 728932  | B2 |
| GPR98 84059    | B2 |
| GPRC5C 55890   | B2 |
| GPRC5D 55507   | B2 |
| GPRC6A 222545  | B2 |
| GPRIN2 9721    | B2 |
| GPRIN3 285513  | B2 |
| GPS1 2873      | B2 |
| GPS2 2874      | B2 |
| GPSM1 26086    | B2 |
| GPSM3 63940    | B2 |
| GPT2 84706     | B2 |
| GPT 2875       | B2 |
| GPX1 2876      | B2 |
| GPX2 2877      | B2 |
| GPX4 2879      | B2 |
| GPX5 2880      | B2 |
| GPX7 2882      | B2 |
| GRAMD1B 57476  | B2 |
| GRAMD1C 54762  | B2 |
| GRAMD2 196996  | B2 |
| GRAMD4 23151   | B2 |
| GRAP2 9402     | B2 |
| GRAPL 400581   | B2 |
| GRAP 10750     | B2 |
| GRB10 2887     | B2 |
| GRB14 2888     | B2 |
| GRB7 2886      | B2 |
| GREB1L 80000   | B2 |
| GREB1 9687     | B2 |
| GREM1 26585    | B2 |
| GRHL1 29841    | B2 |
| GRHL3 57822    | B2 |
| GRHPR 9380     | B2 |
| GRIA1 2890     | B2 |
| GRIA2 2891     | B2 |
| GRIA3 2892     | B2 |
| GRID2IP 392862 | B2 |
| GRID2 2895     | B2 |
| GRIK1 2897     | B2 |
| GRIK2 2898     | B2 |
| GRIK3 2899     | B2 |
| GRIK4 2900     | B2 |
| GRIN1 2902     | B2 |
| GRIN2A 2903    | B2 |
| GRIN2C 2905    | B2 |
| GRIN3A 116443  | B2 |
| GRIN3B 116444  | B2 |

|                |    |
|----------------|----|
| GRINA 2907     | B2 |
| GRIP1 23426    | B2 |
| GRIP2 80852    | B2 |
| GRIPAP1 56850  | B2 |
| GRK1 6011      | B2 |
| GRK4 2868      | B2 |
| GRK6 2870      | B2 |
| GRK7 131890    | B2 |
| GRLF1 2909     | B2 |
| GRM1 2911      | B2 |
| GRM2 2912      | B2 |
| GRM3 2913      | B2 |
| GRM4 2914      | B2 |
| GRM5 2915      | B2 |
| GRM6 2916      | B2 |
| GRPEL1 80273   | B2 |
| GRPR 2925      | B2 |
| GRP 2922       | B2 |
| GRSF1 2926     | B2 |
| GRWD1 83743    | B2 |
| GRXCR2 643226  | B2 |
| GSC 145258     | B2 |
| GSDMA 284110   | B2 |
| GSDMB 55876    | B2 |
| GSDMC 56169    | B2 |
| GSDMD 79792    | B2 |
| GSG1L 146395   | B2 |
| GSG1 83445     | B2 |
| GSS 2937       | B2 |
| GSTA1 2938     | B2 |
| GSTA2 2939     | B2 |
| GSTA3 2940     | B2 |
| GSTA4 2941     | B2 |
| GSTA5 221357   | B2 |
| GSTK1 373156   | B2 |
| GSTM1 2944     | B2 |
| GSTM2P1 442245 | B2 |
| GSTM2 2946     | B2 |
| GSTM3 2947     | B2 |
| GSTM4 2948     | B2 |
| GSTM5 2949     | B2 |
| GSTO1 9446     | B2 |
| GSTO2 119391   | B2 |
| GSTP1 2950     | B2 |
| GSTT1 2952     | B2 |
| GSTT2 2953     | B2 |
| GSTTP2 653399  | B2 |
| GSTZ1 2954     | B2 |
| GSX2 170825    | B2 |
| GTF2A1L 11036  | B2 |
| GTF2A1 2957    | B2 |

|                |    |
|----------------|----|
| GTF2A2 2958    | B2 |
| GTF2B 2959     | B2 |
| GTF2E2 2961    | B2 |
| GTF2F1 2962    | B2 |
| GTF2F2 2963    | B2 |
| GTF2H2B 653238 | B2 |
| GTF2H2C 728340 | B2 |
| GTF2H2 2966    | B2 |
| GTF2H3 2967    | B2 |
| GTF2H4 2968    | B2 |
| GTF2H5 404672  | B2 |
| GTF2IP1 2970   | B2 |
| GTF2I 2969     | B2 |
| GTF3A 2971     | B2 |
| GTF3C3 9330    | B2 |
| GTF3C4 9329    | B2 |
| GTF3C5 9328    | B2 |
| GTF3C6 112495  | B2 |
| GTPBP10 85865  | B2 |
| GTPBP1 9567    | B2 |
| GTPBP2 54676   | B2 |
| GTPBP5 26164   | B2 |
| GTPBP8 29083   | B2 |
| GTSF1L 149699  | B2 |
| GTSF1 121355   | B2 |
| GUCA1B 2979    | B2 |
| GUCA1C 9626    | B2 |
| GUCA2A 2980    | B2 |
| GUCA2B 2981    | B2 |
| GUCY1A2 2977   | B2 |
| GUCY1A3 2982   | B2 |
| GUCY1B2 2974   | B2 |
| GUCY1B3 2983   | B2 |
| GUCY2C 2984    | B2 |
| GUCY2D 3000    | B2 |
| GUCY2E 390226  | B2 |
| GUCY2F 2986    | B2 |
| GUCY2GP 390003 | B2 |
| GUF1 60558     | B2 |
| GULP1 51454    | B2 |
| GUSBL1 387036  | B2 |
| GUSBL2 375513  | B2 |
| GUSBP1 728411  | B2 |
| GUSBP3 653188  | B2 |
| GUSB 2990      | B2 |
| GVIN1 387751   | B2 |
| GXYLT1 283464  | B2 |
| GXYLT2 727936  | B2 |
| GYG1 2992      | B2 |
| GYLTL1B 120071 | B2 |
| GYPA 2993      | B2 |



|               |    |
|---------------|----|
| GYPB 2994     | B2 |
| GYS1 2997     | B2 |
| GYS2 2998     | B2 |
| GZF1 64412    | B2 |
| GZMA 3001     | B2 |
| GZMB 3002     | B2 |
| GZMH 2999     | B2 |
| GZMK 3003     | B2 |
| GZMM 3004     | B2 |
| H19 283120    | B2 |
| H1FNT 341567  | B2 |
| H1FOO 132243  | B2 |
| H1FX 8971     | B2 |
| H2AFB1 474382 | B2 |
| H2AFJ 55766   | B2 |
| H2AFY2 55506  | B2 |
| H2BFM 286436  | B2 |
| H2BFWT 158983 | B2 |
| H2BFXP 767811 | B2 |
| H3F3B 3021    | B2 |
| H3F3C 440093  | B2 |
| HAAO 23498    | B2 |
| HABP2 3026    | B2 |
| HACE1 57531   | B2 |
| HADHB 3032    | B2 |
| HAGH 3029     | B2 |
| HAL 3034      | B2 |
| HAMP 57817    | B2 |
| HAND1 9421    | B2 |
| HAO1 54363    | B2 |
| HAO2 51179    | B2 |
| HAPLN1 1404   | B2 |
| HAPLN2 60484  | B2 |
| HAPLN3 145864 | B2 |
| HAR1A 768096  | B2 |
| HAR1B 768097  | B2 |
| HARS 3035     | B2 |
| HAS1 3036     | B2 |
| HAS2AS 594842 | B2 |
| HAS2 3037     | B2 |
| HAUS2 55142   | B2 |
| HAUS3 79441   | B2 |
| HAUS5 23354   | B2 |
| HAUS6 54801   | B2 |
| HAUS7 55559   | B2 |
| HAVCR1 26762  | B2 |
| HAVCR2 84868  | B2 |
| HBA1 3039     | B2 |
| HBA2 3040     | B2 |
| HBBP1 3044    | B2 |
| HBB 3043      | B2 |

|                 |    |
|-----------------|----|
| HBD 3045        | B2 |
| HBE1 3046       | B2 |
| HBG1 3047       | B2 |
| HBG2 3048       | B2 |
| HBM 3042        | B2 |
| HBQ1 3049       | B2 |
| HBS1L 10767     | B2 |
| HBXIP 10542     | B2 |
| HBZ 3050        | B2 |
| HCCS 3052       | B2 |
| HCFC1R1 54985   | B2 |
| HCG18 414777    | B2 |
| HCG26 352961    | B2 |
| HCG4P6 80868    | B2 |
| HCG4 54435      | B2 |
| HCG9 10255      | B2 |
| HCK 3055        | B2 |
| HCLS1 3059      | B2 |
| HCN1 348980     | B2 |
| HCN2 610        | B2 |
| HCN4 10021      | B2 |
| HCP5 10866      | B2 |
| HCRTR2 3062     | B2 |
| HCRT 3060       | B2 |
| HCST 10870      | B2 |
| HDAC10 83933    | B2 |
| HDAC11 79885    | B2 |
| HDAC2 3066      | B2 |
| HDAC3 8841      | B2 |
| HDAC9 9734      | B2 |
| HDC 3067        | B2 |
| HDDC2 51020     | B2 |
| HDDC3 374659    | B2 |
| HDGFL1 154150   | B2 |
| HDGFRP2 84717   | B2 |
| HDGFRP3 50810   | B2 |
| HDHD1A 8226     | B2 |
| HDHD2 84064     | B2 |
| HDHD3 81932     | B2 |
| HDLBP 3069      | B2 |
| HDX 139324      | B2 |
| HEATR1 55127    | B2 |
| HEATR4 399671   | B2 |
| HEATR5A 25938   | B2 |
| HEATR5B 54497   | B2 |
| HEATR6 63897    | B2 |
| HEATR7A 727957  | B2 |
| HEATR7B2 133558 | B2 |
| HEBP1 50865     | B2 |
| HEBP2 23593     | B2 |
| HECA 51696      | B2 |

|                  |    |
|------------------|----|
| HECTD1 25831     | B2 |
| HECTD2 143279    | B2 |
| HECTD3 79654     | B2 |
| HECW1 23072      | B2 |
| HECW2 57520      | B2 |
| HEG1 57493       | B2 |
| HELB 92797       | B2 |
| HELT 391723      | B2 |
| HELZ 9931        | B2 |
| HEMGN 55363      | B2 |
| HEMK1 51409      | B2 |
| HEPACAM2 253012  | B2 |
| HEPHL1 341208    | B2 |
| HEPH 9843        | B2 |
| HERC2P4 440362   | B2 |
| HERC3 8916       | B2 |
| HERC4 26091      | B2 |
| HERC5 51191      | B2 |
| HERC6 55008      | B2 |
| HERPUD1 9709     | B2 |
| HES1 3280        | B2 |
| HES2 54626       | B2 |
| HES4 57801       | B2 |
| HES5 388585      | B2 |
| HES7 84667       | B2 |
| HESRG 790952     | B2 |
| HESX1 8820       | B2 |
| HEXA 3073        | B2 |
| HEXB 3074        | B2 |
| HEXDC 284004     | B2 |
| HEXIM1 10614     | B2 |
| HEXIM2 124790    | B2 |
| HEY1 23462       | B2 |
| HEY2 23493       | B2 |
| HFE2 148738      | B2 |
| HFE 3077         | B2 |
| HGC6.3 100128124 | B2 |
| HGD 3081         | B2 |
| HGFAC 3083       | B2 |
| HGSNAT 138050    | B2 |
| HGS 9146         | B2 |
| HHATL 57467      | B2 |
| HHEX 3087        | B2 |
| HHIPL1 84439     | B2 |
| HHIPL2 79802     | B2 |
| HHIP 64399       | B2 |
| HHLA1 10086      | B2 |
| HHLA2 11148      | B2 |
| HHLA3 11147      | B2 |
| HIAT1 64645      | B2 |
| HIATL2 84278     | B2 |

|                  |    |
|------------------|----|
| HIBCH 26275      | B2 |
| HIC2 23119       | B2 |
| HIF1AN 55662     | B2 |
| HIF1A 3091       | B2 |
| HIGD1A 25994     | B2 |
| HIGD1B 51751     | B2 |
| HIGD1C 613227    | B2 |
| HIGD2A 192286    | B2 |
| HIGD2B 123346    | B2 |
| HILS1 373861     | B2 |
| HINFP 25988      | B2 |
| HINT1 3094       | B2 |
| HINT2 84681      | B2 |
| HINT3 135114     | B2 |
| HIP1R 9026       | B2 |
| HIP1 3092        | B2 |
| HIPK1 204851     | B2 |
| HIPK4 147746     | B2 |
| HIRA 7290        | B2 |
| HIRIP3 8479      | B2 |
| HIST1H1A 3024    | B2 |
| HIST1H1B 3009    | B2 |
| HIST1H1D 3007    | B2 |
| HIST1H1E 3008    | B2 |
| HIST1H2AB 8335   | B2 |
| HIST1H2AE 3012   | B2 |
| HIST1H2AG 8969   | B2 |
| HIST1H2AH 85235  | B2 |
| HIST1H2AK 8330   | B2 |
| HIST1H2AL 8332   | B2 |
| HIST1H2BB 3018   | B2 |
| HIST1H2BF 8343   | B2 |
| HIST1H2BI 8346   | B2 |
| HIST1H2BL 8340   | B2 |
| HIST1H2BM 8342   | B2 |
| HIST1H3A 8350    | B2 |
| HIST1H3B 8358    | B2 |
| HIST1H3C 8352    | B2 |
| HIST1H3G 8355    | B2 |
| HIST1H3I 8354    | B2 |
| HIST1H4B 8366    | B2 |
| HIST1H4C 8364    | B2 |
| HIST1H4E 8367    | B2 |
| HIST1H4F 8361    | B2 |
| HIST1H4G 8369    | B2 |
| HIST1H4H 8365    | B2 |
| HIST1H4K 8362    | B2 |
| HIST1H4L 8368    | B2 |
| HIST2H2AB 317772 | B2 |
| HIST2H2BA 337875 | B2 |
| HIST2H3C 126961  | B2 |

|                 |    |
|-----------------|----|
| HIST2H3D 653604 | B2 |
| HIST2H4A 8370   | B2 |
| HIST3H2A 92815  | B2 |
| HIST3H3 8290    | B2 |
| HIST4H4 121504  | B2 |
| HIVEP1 3096     | B2 |
| HIVEP3 59269    | B2 |
| HK2 3099        | B2 |
| HK3 3101        | B2 |
| HKDC1 80201     | B2 |
| HKR1 284459     | B2 |
| HLA-A 3105      | B2 |
| HLA-B 3106      | B2 |
| HLA-DMA 3108    | B2 |
| HLA-DMB 3109    | B2 |
| HLA-DOA 3111    | B2 |
| HLA-DOB 3112    | B2 |
| HLA-DPA1 3113   | B2 |
| HLA-DPB1 3115   | B2 |
| HLA-DPB2 3116   | B2 |
| HLA-DQA1 3117   | B2 |
| HLA-DQA2 3118   | B2 |
| HLA-DQB1 3119   | B2 |
| HLA-DQB2 3120   | B2 |
| HLA-DRA 3122    | B2 |
| HLA-DRB1 3123   | B2 |
| HLA-DRB5 3127   | B2 |
| HLA-DRB6 3128   | B2 |
| HLA-F 3134      | B2 |
| HLA-G 3135      | B2 |
| HLA-H 3136      | B2 |
| HLA-J 3137      | B2 |
| HLA-L 3139      | B2 |
| HLX 3142        | B2 |
| HMBOX1 79618    | B2 |
| HMCN1 83872     | B2 |
| HMG20A 10363    | B2 |
| HMGB1 3146      | B2 |
| HMGB3L1 128872  | B2 |
| HMGB4 127540    | B2 |
| HMGCL 3155      | B2 |
| HMGCS1 3157     | B2 |
| HMGCS2 3158     | B2 |
| HMGN4 10473     | B2 |
| HMGN5 79366     | B2 |
| HMGXB3 22993    | B2 |
| HMGXB4 10042    | B2 |
| HMHA1 23526     | B2 |
| HMHB1 57824     | B2 |
| HMOX1 3162      | B2 |
| HMP19 51617     | B2 |

|                  |    |
|------------------|----|
| HMSD 284293      | B2 |
| HMX1 3166        | B2 |
| HMX2 3167        | B2 |
| HMX3 340784      | B2 |
| HNF1A 6927       | B2 |
| HNF1B 6928       | B2 |
| HNF4A 3172       | B2 |
| HNF4G 3174       | B2 |
| HNRNPA0 10949    | B2 |
| HNRNPA1L2 144983 | B2 |
| HNRNPA1 3178     | B2 |
| HNRNPA3 220988   | B2 |
| HNRNPD 3184      | B2 |
| HNRNPH1 3187     | B2 |
| HNRNPH2 3188     | B2 |
| HNRNPH3 3189     | B2 |
| HNRNPM 4670      | B2 |
| HNRNPUL2 221092  | B2 |
| HNRPLL 92906     | B2 |
| HOMER1 9456      | B2 |
| HOMER2 9455      | B2 |
| HOMEZ 57594      | B2 |
| HOOK1 51361      | B2 |
| HORMAD1 84072    | B2 |
| HORMAD2 150280   | B2 |
| HOXA11AS 221883  | B2 |
| HOXA11 3207      | B2 |
| HOXA13 3209      | B2 |
| HOXA1 3198       | B2 |
| HOXB13 10481     | B2 |
| HOXB1 3211       | B2 |
| HOXB2 3212       | B2 |
| HOXB3 3213       | B2 |
| HOXB4 3214       | B2 |
| HOXB5 3215       | B2 |
| HOXB6 3216       | B2 |
| HOXB7 3217       | B2 |
| HOXB8 3218       | B2 |
| HOXB9 3219       | B2 |
| HOXC12 3228      | B2 |
| HOXC5 3222       | B2 |
| HOXC6 3223       | B2 |
| HOXC8 3224       | B2 |
| HOXC9 3225       | B2 |
| HOXD11 3237      | B2 |
| HOXD12 3238      | B2 |
| HOXD13 3239      | B2 |
| HOXD1 3231       | B2 |
| HOXD8 3234       | B2 |
| HP1BP3 50809     | B2 |
| HPCAL1 3241      | B2 |

|                  |    |
|------------------|----|
| HPCAL4 51440     | B2 |
| HPCA 3208        | B2 |
| HPDL 84842       | B2 |
| HPD 3242         | B2 |
| HPGDS 27306      | B2 |
| HPGD 3248        | B2 |
| HPR 3250         | B2 |
| HPS6 79803       | B2 |
| HPSE 10855       | B2 |
| HPVC1 3262       | B2 |
| HPX 3263         | B2 |
| HPYR1 93668      | B2 |
| HP 3240          | B2 |
| HRASLS2 54979    | B2 |
| HRASLS 57110     | B2 |
| HRAS 3265        | B2 |
| HRCT1 646962     | B2 |
| HRC 3270         | B2 |
| HRG 3273         | B2 |
| HRH1 3269        | B2 |
| HRH2 3274        | B2 |
| HRH3 11255       | B2 |
| HRK 8739         | B2 |
| HRNBP3 146713    | B2 |
| HRSP12 10247     | B2 |
| HR 55806         | B2 |
| HS1BP3 64342     | B2 |
| HS2ST1 9653      | B2 |
| HS3ST1 9957      | B2 |
| HS3ST2 9956      | B2 |
| HS3ST3B1 9953    | B2 |
| HS3ST5 222537    | B2 |
| HS3ST6 64711     | B2 |
| HS6ST2 90161     | B2 |
| HSBP1L1 440498   | B2 |
| HSBP1 3281       | B2 |
| HSCB 150274      | B2 |
| HSD11B1L 374875  | B2 |
| HSD11B2 3291     | B2 |
| HSD17B12 51144   | B2 |
| HSD17B14 51171   | B2 |
| HSD17B1 3292     | B2 |
| HSD17B2 3294     | B2 |
| HSD17B3 3293     | B2 |
| HSD17B4 3295     | B2 |
| HSD17B7P2 158160 | B2 |
| HSD17B8 7923     | B2 |
| HSD3B1 3283      | B2 |
| HSD3B2 3284      | B2 |
| HSD3B7 80270     | B2 |
| HSDL1 83693      | B2 |

|                  |    |
|------------------|----|
| HSF1 3297        | B2 |
| HSF2 3298        | B2 |
| HSF5 124535      | B2 |
| HSFX2 100130086  | B2 |
| HSFYL1 27437     | B2 |
| HSN2 378465      | B2 |
| HSP90AB2P 391634 | B2 |
| HSP90AB4P 664618 | B2 |
| HSP90B3P 343477  | B2 |
| HSPA1A 3303      | B2 |
| HSPA1B 3304      | B2 |
| HSPA1L 3305      | B2 |
| HSPA2 3306       | B2 |
| HSPA4L 22824     | B2 |
| HSPA6 3310       | B2 |
| HSPA7 3311       | B2 |
| HSPB3 8988       | B2 |
| HSPB7 27129      | B2 |
| HSPB8 26353      | B2 |
| HSPB9 94086      | B2 |
| HSPBAP1 79663    | B2 |
| HSPC072 29075    | B2 |
| HSPC159 29094    | B2 |
| HSPG2 3339       | B2 |
| HTATSF1 27336    | B2 |
| HTA 283902       | B2 |
| HTR1A 3350       | B2 |
| HTR1B 3351       | B2 |
| HTR1E 3354       | B2 |
| HTR1F 3355       | B2 |
| HTR2B 3357       | B2 |
| HTR2C 3358       | B2 |
| HTR3A 3359       | B2 |
| HTR3B 9177       | B2 |
| HTR3D 200909     | B2 |
| HTR3E 285242     | B2 |
| HTR5A 3361       | B2 |
| HTR6 3362        | B2 |
| HTR7P1 93164     | B2 |
| HTR7 3363        | B2 |
| HTRA1 5654       | B2 |
| HTRA2 27429      | B2 |
| HTRA3 94031      | B2 |
| HTRA4 203100     | B2 |
| HTT 3064         | B2 |
| HULC 728655      | B2 |
| HUNK 30811       | B2 |
| HUS1B 135458     | B2 |
| HUWE1 10075      | B2 |
| HVCN1 84329      | B2 |
| HYAL2 8692       | B2 |



|                |    |
|----------------|----|
| HYAL4 23553    | B2 |
| HYDIN 54768    | B2 |
| HYI 81888      | B2 |
| IAH1 285148    | B2 |
| IAPP 3375      | B2 |
| IBSP 3381      | B2 |
| IBTK 25998     | B2 |
| ICAIL 130026   | B2 |
| ICAM1 3383     | B2 |
| ICAM3 3385     | B2 |
| ICAM4 3386     | B2 |
| ICAM5 7087     | B2 |
| ICK 22858      | B2 |
| ICMT 23463     | B2 |
| ICOSLG 23308   | B2 |
| ICOS 29851     | B2 |
| ID2B 84099     | B2 |
| ID2 3398       | B2 |
| ID3 3399       | B2 |
| IDH1 3417      | B2 |
| IDH2 3418      | B2 |
| IDH3A 3419     | B2 |
| IDH3B 3420     | B2 |
| IDH3G 3421     | B2 |
| IDI1 3422      | B2 |
| IDI2 91734     | B2 |
| IDO1 3620      | B2 |
| IDO2 169355    | B2 |
| IDS 3423       | B2 |
| IDUA 3425      | B2 |
| IER2 9592      | B2 |
| IER3 8870      | B2 |
| IER5 51278     | B2 |
| IFI16 3428     | B2 |
| IFI27L1 122509 | B2 |
| IFI27L2 83982  | B2 |
| IFI27 3429     | B2 |
| IFI44L 10964   | B2 |
| IFI44 10561    | B2 |
| IFIH1 64135    | B2 |
| IFIT1B 439996  | B2 |
| IFIT1 3434     | B2 |
| IFIT2 3433     | B2 |
| IFIT3 3437     | B2 |
| IFIT5 24138    | B2 |
| IFITM1 8519    | B2 |
| IFITM2 10581   | B2 |
| IFITM3 10410   | B2 |
| IFITM4P 340198 | B2 |
| IFITM5 387733  | B2 |
| IFLTD1 160492  | B2 |

|               |    |
|---------------|----|
| IFNA10 3446   | B2 |
| IFNA13 3447   | B2 |
| IFNA17 3451   | B2 |
| IFNA1 3439    | B2 |
| IFNA21 3452   | B2 |
| IFNA2 3440    | B2 |
| IFNA5 3442    | B2 |
| IFNA6 3443    | B2 |
| IFNA8 3445    | B2 |
| IFNAR1 3454   | B2 |
| IFNAR2 3455   | B2 |
| IFNB1 3456    | B2 |
| IFNGR2 3460   | B2 |
| IFNG 3458     | B2 |
| IFNK 56832    | B2 |
| IFNW1 3467    | B2 |
| IFRD1 3475    | B2 |
| IFRD2 7866    | B2 |
| IFT122 55764  | B2 |
| IFT140 9742   | B2 |
| IFT172 26160  | B2 |
| IFT20 90410   | B2 |
| IFT27 11020   | B2 |
| IFT46 56912   | B2 |
| IFT52 51098   | B2 |
| IFT57 55081   | B2 |
| IFT74 80173   | B2 |
| IFT80 57560   | B2 |
| IFT81 28981   | B2 |
| IFT88 8100    | B2 |
| IGBP1 3476    | B2 |
| IGDCC3 9543   | B2 |
| IGDCC4 57722  | B2 |
| IGF1R 3480    | B2 |
| IGF2AS 51214  | B2 |
| IGF2BP1 10642 | B2 |
| IGF2BP3 10643 | B2 |
| IGF2R 3482    | B2 |
| IGFALS 3483   | B2 |
| IGFBP1 3484   | B2 |
| IGFBP2 3485   | B2 |
| IGFBP3 3486   | B2 |
| IGFBP4 3487   | B2 |
| IGFBP5 3488   | B2 |
| IGFBP7 3490   | B2 |
| IGFL1 374918  | B2 |
| IGFL2 147920  | B2 |
| IGFL3 388555  | B2 |
| IGFL4 444882  | B2 |
| IGFN1 91156   | B2 |
| IGHMBP2 3508  | B2 |

|                |    |
|----------------|----|
| IPLL1 3543     | B2 |
| IPLL3 91353    | B2 |
| IPLON5 402665  | B2 |
| IGSF11 152404  | B2 |
| IGSF1 3547     | B2 |
| IGSF21 84966   | B2 |
| IGSF22 283284  | B2 |
| IGSF3 3321     | B2 |
| IGSF5 150084   | B2 |
| IGSF6 10261    | B2 |
| IGSF9B 22997   | B2 |
| IHH 3549       | B2 |
| IKBIP 121457   | B2 |
| IKBKAP 8518    | B2 |
| IKBKB 3551     | B2 |
| IKBKG 8517     | B2 |
| IKZF1 10320    | B2 |
| IKZF2 22807    | B2 |
| IKZF3 22806    | B2 |
| IK 3550        | B2 |
| IL10RA 3587    | B2 |
| IL10RB 3588    | B2 |
| IL10 3586      | B2 |
| IL12A 3592     | B2 |
| IL12B 3593     | B2 |
| IL12RB1 3594   | B2 |
| IL12RB2 3595   | B2 |
| IL13RA1 3597   | B2 |
| IL13RA2 3598   | B2 |
| IL13 3596      | B2 |
| IL15 3600      | B2 |
| IL16 3603      | B2 |
| IL17A 3605     | B2 |
| IL17C 27189    | B2 |
| IL17D 53342    | B2 |
| IL17F 112744   | B2 |
| IL17RB 55540   | B2 |
| IL17RC 84818   | B2 |
| IL17REL 400935 | B2 |
| IL17RE 132014  | B2 |
| IL18BP 10068   | B2 |
| IL18R1 8809    | B2 |
| IL18RAP 8807   | B2 |
| IL19 29949     | B2 |
| IL1A 3552      | B2 |
| IL1B 3553      | B2 |
| IL1F10 84639   | B2 |
| IL1F5 26525    | B2 |
| IL1F6 27179    | B2 |
| IL1F7 27178    | B2 |
| IL1F8 27177    | B2 |

|                |    |
|----------------|----|
| IL1F9 56300    | B2 |
| IL1R2 7850     | B2 |
| IL1RAPL1 11141 | B2 |
| IL1RAPL2 26280 | B2 |
| IL1RAP 3556    | B2 |
| IL1RL1 9173    | B2 |
| IL1RN 3557     | B2 |
| IL20RA 53832   | B2 |
| IL20RB 53833   | B2 |
| IL20 50604     | B2 |
| IL21 59067     | B2 |
| IL22RA2 116379 | B2 |
| IL22 50616     | B2 |
| IL23A 51561    | B2 |
| IL23R 149233   | B2 |
| IL24 11009     | B2 |
| IL25 64806     | B2 |
| IL26 55801     | B2 |
| IL27RA 9466    | B2 |
| IL27 246778    | B2 |
| IL28A 282616   | B2 |
| IL28B 282617   | B2 |
| IL29 282618    | B2 |
| IL2RA 3559     | B2 |
| IL2RB 3560     | B2 |
| IL2RG 3561     | B2 |
| IL2 3558       | B2 |
| IL31RA 133396  | B2 |
| IL32 9235      | B2 |
| IL34 146433    | B2 |
| IL4 3565       | B2 |
| IL5RA 3568     | B2 |
| IL5 3567       | B2 |
| IL6ST 3572     | B2 |
| IL6 3569       | B2 |
| IL7R 3575      | B2 |
| IL7 3574       | B2 |
| IL8 3576       | B2 |
| IL9 3578       | B2 |
| ILF3 3609      | B2 |
| ILKAP 80895    | B2 |
| ILVBL 10994    | B2 |
| IMMP1L 196294  | B2 |
| IMMT 10989     | B2 |
| IMP3 55272     | B2 |
| IMP4 92856     | B2 |
| IMP5 162540    | B2 |
| IMPA1 3612     | B2 |
| IMPA2 3613     | B2 |
| IMPACT 55364   | B2 |
| IMPAD1 54928   | B2 |

|                 |    |
|-----------------|----|
| IMPDH1 3614     | B2 |
| IMPDH2 3615     | B2 |
| IMPG1 3617      | B2 |
| IMPG2 50939     | B2 |
| INADL 10207     | B2 |
| INA 9118        | B2 |
| INCA1 388324    | B2 |
| INE2 8551       | B2 |
| INF2 64423      | B2 |
| ING1 3621       | B2 |
| ING2 3622       | B2 |
| ING4 51147      | B2 |
| INGX 27160      | B2 |
| INHA 3623       | B2 |
| INHBC 3626      | B2 |
| INHBE 83729     | B2 |
| INO80B 83444    | B2 |
| INO80C 125476   | B2 |
| INO80D 54891    | B2 |
| INO80E 283899   | B2 |
| INPP4A 3631     | B2 |
| INPP4B 8821     | B2 |
| INPP5D 3635     | B2 |
| INPP5E 56623    | B2 |
| INPP5F 22876    | B2 |
| INPP5J 27124    | B2 |
| INPPL1 3636     | B2 |
| INS-IGF2 723961 | B2 |
| INSC 387755     | B2 |
| INSIG1 3638     | B2 |
| INSIG2 51141    | B2 |
| INSL3 3640      | B2 |
| INSL4 3641      | B2 |
| INSL5 10022     | B2 |
| INSL6 11172     | B2 |
| INSM1 3642      | B2 |
| INSM2 84684     | B2 |
| INSRR 3645      | B2 |
| INSR 3643       | B2 |
| INTS12 57117    | B2 |
| INTS1 26173     | B2 |
| INTS2 57508     | B2 |
| INTS3 65123     | B2 |
| INTS4L1 285905  | B2 |
| INTS4L2 644619  | B2 |
| INTS4 92105     | B2 |
| INTS5 80789     | B2 |
| INTS6 26512     | B2 |
| INTS9 55756     | B2 |
| IP6K2 51447     | B2 |
| IP6K3 117283    | B2 |

|                 |    |
|-----------------|----|
| IPCEF1 26034    | B2 |
| IPMK 253430     | B2 |
| IPO11 51194     | B2 |
| IPO13 9670      | B2 |
| IPO5 3843       | B2 |
| IPO7 10527      | B2 |
| IPO8 10526      | B2 |
| IPP 3652        | B2 |
| IQCA1 79781     | B2 |
| IQCB1 9657      | B2 |
| IQCC 55721      | B2 |
| IQCE 23288      | B2 |
| IQCF1 132141    | B2 |
| IQCF2 389123    | B2 |
| IQCF3 401067    | B2 |
| IQCF6 440956    | B2 |
| IQCG 84223      | B2 |
| IQCH 64799      | B2 |
| IQCJ 654502     | B2 |
| IQGAP1 8826     | B2 |
| IQGAP2 10788    | B2 |
| IQSEC2 23096    | B2 |
| IQUB 154865     | B2 |
| IRAK1BP1 134728 | B2 |
| IRAK1 3654      | B2 |
| IRAK3 11213     | B2 |
| IRAK4 51135     | B2 |
| IREB2 3658      | B2 |
| IRF1 3659       | B2 |
| IRF2BP1 26145   | B2 |
| IRF2BP2 359948  | B2 |
| IRF2 3660       | B2 |
| IRF3 3661       | B2 |
| IRF4 3662       | B2 |
| IRF5 3663       | B2 |
| IRF6 3664       | B2 |
| IRF8 3394       | B2 |
| IRGC 56269      | B2 |
| IRGM 345611     | B2 |
| IRGQ 126298     | B2 |
| IRS4 8471       | B2 |
| IRX2 153572     | B2 |
| IRX3 79191      | B2 |
| IRX4 50805      | B2 |
| ISCA1P1 389293  | B2 |
| ISCA2 122961    | B2 |
| ISG20 3669      | B2 |
| ISL1 3670       | B2 |
| ISL2 64843      | B2 |
| ISLR 3671       | B2 |
| ISM2 145501     | B2 |

|                 |    |
|-----------------|----|
| ISOC1 51015     | B2 |
| ISPD 729920     | B2 |
| ISX 91464       | B2 |
| ISY1 57461      | B2 |
| ISYNA1 51477    | B2 |
| ITCH 83737      | B2 |
| ITFG1 81533     | B2 |
| ITFG3 83986     | B2 |
| ITGA10 8515     | B2 |
| ITGA11 22801    | B2 |
| ITGA2B 3674     | B2 |
| ITGA2 3673      | B2 |
| ITGA4 3676      | B2 |
| ITGA5 3678      | B2 |
| ITGA8 8516      | B2 |
| ITGAD 3681      | B2 |
| ITGAE 3682      | B2 |
| ITGAL 3683      | B2 |
| ITGAM 3684      | B2 |
| ITGAV 3685      | B2 |
| ITGAX 3687      | B2 |
| ITGB1BP2 26548  | B2 |
| ITGB1BP3 27231  | B2 |
| ITGB2 3689      | B2 |
| ITGB3BP 23421   | B2 |
| ITGB3 3690      | B2 |
| ITGB4 3691      | B2 |
| ITGB5 3693      | B2 |
| ITGB6 3694      | B2 |
| ITGB7 3695      | B2 |
| ITGB8 3696      | B2 |
| ITGBL1 9358     | B2 |
| ITIH1 3697      | B2 |
| ITIH2 3698      | B2 |
| ITIH3 3699      | B2 |
| ITIH4 3700      | B2 |
| ITIH5L 347365   | B2 |
| ITK 3702        | B2 |
| ITLN1 55600     | B2 |
| ITLN2 142683    | B2 |
| ITM2C 81618     | B2 |
| ITPA 3704       | B2 |
| ITPK1 3705      | B2 |
| ITPKA 3706      | B2 |
| ITPKB 3707      | B2 |
| ITPKC 80271     | B2 |
| ITPR2 3709      | B2 |
| ITPRIPL2 162073 | B2 |
| ITPRIP 85450    | B2 |
| ITSN2 50618     | B2 |
| IVD 3712        | B2 |

|                |    |
|----------------|----|
| IVL 3713       | B2 |
| IVNS1ABP 10625 | B2 |
| IWS1 55677     | B2 |
| IYD 389434     | B2 |
| IZUMO1 284359  | B2 |
| JAGN1 84522    | B2 |
| JAK2 3717      | B2 |
| JAK3 3718      | B2 |
| JAKMIP2 9832   | B2 |
| JAKMIP3 282973 | B2 |
| JHDM1D 80853   | B2 |
| JKAMP 51528    | B2 |
| JMJD5 79831    | B2 |
| JMJD6 23210    | B2 |
| JMJD8 339123   | B2 |
| JOSD1 9929     | B2 |
| JOSD2 126119   | B2 |
| JPH1 56704     | B2 |
| JPH3 57338     | B2 |
| JSRP1 126306   | B2 |
| JUB 84962      | B2 |
| JUNB 3726      | B2 |
| JUP 3728       | B2 |
| KAAG1 353219   | B2 |
| KAL1 3730      | B2 |
| KANK4 163782   | B2 |
| KARS 3735      | B2 |
| KAT2A 2648     | B2 |
| KAT5 10524     | B2 |
| KATNA1 11104   | B2 |
| KATNAL2 83473  | B2 |
| KATNB1 10300   | B2 |
| KAZALD1 81621  | B2 |
| KAZ 23254      | B2 |
| KBTD10 10324   | B2 |
| KBTD12 166348  | B2 |
| KBTD13 390594  | B2 |
| KBTD2 25948    | B2 |
| KBTD4 55709    | B2 |
| KBTD5 131377   | B2 |
| KBTD7 84078    | B2 |
| KBTD8 84541    | B2 |
| KC6 641516     | B2 |
| KCMF1 56888    | B2 |
| KCNA10 3744    | B2 |
| KCNA3 3738     | B2 |
| KCNA5 3741     | B2 |
| KCNA7 3743     | B2 |
| KCNAB2 8514    | B2 |
| KCNAB3 9196    | B2 |
| KCNB2 9312     | B2 |



|              |    |
|--------------|----|
| KCNC1 3746   | B2 |
| KCNC2 3747   | B2 |
| KCNC3 3748   | B2 |
| KCND1 3750   | B2 |
| KCND2 3751   | B2 |
| KCND3 3752   | B2 |
| KCNE1L 23630 | B2 |
| KCNE2 9992   | B2 |
| KCNE3 10008  | B2 |
| KCNE4 23704  | B2 |
| KCNF1 3754   | B2 |
| KCNG1 3755   | B2 |
| KCNG2 26251  | B2 |
| KCNG3 170850 | B2 |
| KCNG4 93107  | B2 |
| KCNH2 3757   | B2 |
| KCNH4 23415  | B2 |
| KCNH6 81033  | B2 |
| KCNH7 90134  | B2 |
| KCNJ10 3766  | B2 |
| KCNJ11 3767  | B2 |
| KCNJ12 3768  | B2 |
| KCNJ13 3769  | B2 |
| KCNJ14 3770  | B2 |
| KCNJ15 3772  | B2 |
| KCNJ16 3773  | B2 |
| KCNJ1 3758   | B2 |
| KCNJ3 3760   | B2 |
| KCNJ4 3761   | B2 |
| KCNJ5 3762   | B2 |
| KCNJ6 3763   | B2 |
| KCNJ9 3765   | B2 |
| KCNK10 54207 | B2 |
| KCNK12 56660 | B2 |
| KCNK13 56659 | B2 |
| KCNK16 83795 | B2 |
| KCNK17 89822 | B2 |
| KCNK2 3776   | B2 |
| KCNK3 3777   | B2 |
| KCNK4 50801  | B2 |
| KCNK5 8645   | B2 |
| KCNK7 10089  | B2 |
| KCNK9 51305  | B2 |
| KCNMA1 3778  | B2 |
| KCNMB2 10242 | B2 |
| KCNMB3 27094 | B2 |
| KCNMB4 27345 | B2 |
| KCNN1 3780   | B2 |
| KCNN2 3781   | B2 |
| KCNN3 3782   | B2 |
| KCNN4 3783   | B2 |

|                  |    |
|------------------|----|
| KCNQ1DN 55539    | B2 |
| KCNQ1OT1 10984   | B2 |
| KCNQ1 3784       | B2 |
| KCNQ2 3785       | B2 |
| KCNQ3 3786       | B2 |
| KCNQ4 9132       | B2 |
| KCNQ5 56479      | B2 |
| KCNRG 283518     | B2 |
| KCNS1 3787       | B2 |
| KCNS2 3788       | B2 |
| KCNT1 57582      | B2 |
| KCNU1 157855     | B2 |
| KCNV1 27012      | B2 |
| KCNV2 169522     | B2 |
| KCP 375616       | B2 |
| KCTD11 147040    | B2 |
| KCTD16 57528     | B2 |
| KCTD17 79734     | B2 |
| KCTD19 146212    | B2 |
| KCTD1 284252     | B2 |
| KCTD20 222658    | B2 |
| KCTD21 283219    | B2 |
| KCTD8 386617     | B2 |
| KDELC2 143888    | B2 |
| KDM2A 22992      | B2 |
| KDM2B 84678      | B2 |
| KDM3A 55818      | B2 |
| KDM3B 51780      | B2 |
| KDM4A 9682       | B2 |
| KDM4C 23081      | B2 |
| KDM4DL 390245    | B2 |
| KDM4D 55693      | B2 |
| KDM5A 5927       | B2 |
| KDM5C 8242       | B2 |
| KDM5D 8284       | B2 |
| KDM6A 7403       | B2 |
| KEAP1 9817       | B2 |
| KEL 3792         | B2 |
| KERA 11081       | B2 |
| KGFLP1 387628    | B2 |
| KGFLP2 654466    | B2 |
| KHDC1L 100129128 | B2 |
| KHDC1 80759      | B2 |
| KHDRBS2 202559   | B2 |
| KHDRBS3 10656    | B2 |
| KHK 3795         | B2 |
| KHNYN 23351      | B2 |
| KHSRP 8570       | B2 |
| KIAA0020 9933    | B2 |
| KIAA0087 9808    | B2 |
| KIAA0090 23065   | B2 |

|                      |    |
|----------------------|----|
| KIAA0100 9703        | B2 |
| KIAA0114 57291       | B2 |
| KIAA0125 9834        | B2 |
| KIAA0146 23514       | B2 |
| KIAA0174 9798        | B2 |
| KIAA0182 23199       | B2 |
| KIAA0195 9772        | B2 |
| KIAA0232 9778        | B2 |
| KIAA0247 9766        | B2 |
| KIAA0284 283638      | B2 |
| KIAA0317 9870        | B2 |
| KIAA0319L 79932      | B2 |
| KIAA0319 9856        | B2 |
| KIAA0368 23392       | B2 |
| KIAA0415 9907        | B2 |
| KIAA0513 9764        | B2 |
| KIAA0528 9847        | B2 |
| KIAA0562 9731        | B2 |
| KIAA0564 23078       | B2 |
| KIAA0586 9786        | B2 |
| KIAA0649 9858        | B2 |
| KIAA0652 9776        | B2 |
| KIAA0664P3 100132341 | B2 |
| KIAA0664 23277       | B2 |
| KIAA0748 9840        | B2 |
| KIAA0753 9851        | B2 |
| KIAA0776 23376       | B2 |
| KIAA0802 23255       | B2 |
| KIAA0892 23383       | B2 |
| KIAA0895L 653319     | B2 |
| KIAA0907 22889       | B2 |
| KIAA0922 23240       | B2 |
| KIAA0947 23379       | B2 |
| KIAA1012 22878       | B2 |
| KIAA1024 23251       | B2 |
| KIAA1033 23325       | B2 |
| KIAA1147 57189       | B2 |
| KIAA1161 57462       | B2 |
| KIAA1191 57179       | B2 |
| KIAA1210 57481       | B2 |
| KIAA1217 56243       | B2 |
| KIAA1239 57495       | B2 |
| KIAA1244 57221       | B2 |
| KIAA1257 57501       | B2 |
| KIAA1267 284058      | B2 |
| KIAA1274 27143       | B2 |
| KIAA1279 26128       | B2 |
| KIAA1310 55683       | B2 |
| KIAA1324L 222223     | B2 |
| KIAA1324 57535       | B2 |
| KIAA1370 56204       | B2 |

|                 |    |
|-----------------|----|
| KIAA1377 57562  | B2 |
| KIAA1383 54627  | B2 |
| KIAA1407 57577  | B2 |
| KIAA1409 57578  | B2 |
| KIAA1429 25962  | B2 |
| KIAA1430 57587  | B2 |
| KIAA1432 57589  | B2 |
| KIAA1462 57608  | B2 |
| KIAA1467 57613  | B2 |
| KIAA1468 57614  | B2 |
| KIAA1486 57624  | B2 |
| KIAA1529 57653  | B2 |
| KIAA1530 57654  | B2 |
| KIAA1539 80256  | B2 |
| KIAA1549 57670  | B2 |
| KIAA1586 57691  | B2 |
| KIAA1609 57707  | B2 |
| KIAA1632 57724  | B2 |
| KIAA1644 85352  | B2 |
| KIAA1704 55425  | B2 |
| KIAA1712 80817  | B2 |
| KIAA1715 80856  | B2 |
| KIAA1731 85459  | B2 |
| KIAA1737 85457  | B2 |
| KIAA1751 85452  | B2 |
| KIAA1755 85449  | B2 |
| KIAA1797 54914  | B2 |
| KIAA1804 84451  | B2 |
| KIAA1826 84437  | B2 |
| KIAA1875 340390 | B2 |
| KIAA1919 91749  | B2 |
| KIAA1949 170954 | B2 |
| KIAA1958 158405 | B2 |
| KIAA1967 57805  | B2 |
| KIAA1984 84960  | B2 |
| KIAA2013 90231  | B2 |
| KIAA2018 205717 | B2 |
| KIAA2022 340533 | B2 |
| KIAA2026 158358 | B2 |
| KIF12 113220    | B2 |
| KIF13B 23303    | B2 |
| KIF16B 55614    | B2 |
| KIF19 124602    | B2 |
| KIF1A 547       | B2 |
| KIF1B 23095     | B2 |
| KIF21B 23046    | B2 |
| KIF27 55582     | B2 |
| KIF2A 3796      | B2 |
| KIF3A 11127     | B2 |
| KIF3C 3797      | B2 |
| KIF5A 3798      | B2 |

|                  |    |
|------------------|----|
| KIF5B 3799       | B2 |
| KIF5C 3800       | B2 |
| KIF6 221458      | B2 |
| KIF9 64147       | B2 |
| KIFC3 3801       | B2 |
| KILLIN 100144748 | B2 |
| KIN 22944        | B2 |
| KIR2DL1 3802     | B2 |
| KIR2DL3 3804     | B2 |
| KIR2DL4 3805     | B2 |
| KIR2DS4 3809     | B2 |
| KIR3DL1 3811     | B2 |
| KIR3DL2 3812     | B2 |
| KIR3DL3 115653   | B2 |
| KIR3DX1 90011    | B2 |
| KIRREL2 84063    | B2 |
| KIRREL3 84623    | B2 |
| KISS1R 84634     | B2 |
| KISS1 3814       | B2 |
| KITLG 4254       | B2 |
| KLC3 147700      | B2 |
| KLC4 89953       | B2 |
| KLF12 11278      | B2 |
| KLF16 83855      | B2 |
| KLF17 128209     | B2 |
| KLF5 688         | B2 |
| KLF7 8609        | B2 |
| KLHDC10 23008    | B2 |
| KLHDC3 116138    | B2 |
| KLHDC4 54758     | B2 |
| KLHDC5 57542     | B2 |
| KLHDC7A 127707   | B2 |
| KLHDC7B 113730   | B2 |
| KLHDC8A 55220    | B2 |
| KLHL11 55175     | B2 |
| KLHL14 57565     | B2 |
| KLHL17 339451    | B2 |
| KLHL18 23276     | B2 |
| KLHL1 57626      | B2 |
| KLHL20 27252     | B2 |
| KLHL22 84861     | B2 |
| KLHL23 151230    | B2 |
| KLHL24 54800     | B2 |
| KLHL25 64410     | B2 |
| KLHL26 55295     | B2 |
| KLHL28 54813     | B2 |
| KLHL30 377007    | B2 |
| KLHL31 401265    | B2 |
| KLHL33 123103    | B2 |
| KLHL34 257240    | B2 |
| KLHL35 283212    | B2 |

|               |    |
|---------------|----|
| KLHL36 79786  | B2 |
| KLHL38 340359 | B2 |
| KLHL5 51088   | B2 |
| KLHL6 89857   | B2 |
| KLHL7 55975   | B2 |
| KLHL8 57563   | B2 |
| KLHL9 55958   | B2 |
| CLK10 5655    | B2 |
| CLK11 11012   | B2 |
| CLK12 43849   | B2 |
| CLK13 26085   | B2 |
| CLK14 43847   | B2 |
| CLK15 55554   | B2 |
| CLK1 3816     | B2 |
| CLK2 3817     | B2 |
| CLK3 354      | B2 |
| CLK5 25818    | B2 |
| CLK6 5653     | B2 |
| CLK7 5650     | B2 |
| CLK8 11202    | B2 |
| CLK9 284366   | B2 |
| CLKB1 3818    | B2 |
| KLRA1 10748   | B2 |
| KLRA1 3820    | B2 |
| KLRC1 3821    | B2 |
| KLRC2 3822    | B2 |
| KLRC3 3823    | B2 |
| KLRC4 8302    | B2 |
| KLRC1 3824    | B2 |
| KLRC1 10219   | B2 |
| KLRC2 346689  | B2 |
| KLRC1 22914   | B2 |
| KMO 8564      | B2 |
| KNCN 148930   | B2 |
| KNDC1 85442   | B2 |
| KNG1 3827     | B2 |
| KPNA1 3836    | B2 |
| KPNA3 3839    | B2 |
| KPNA4 3840    | B2 |
| KPNA6 23633   | B2 |
| KPNA7 402569  | B2 |
| KPRP 448834   | B2 |
| KRBA1 84626   | B2 |
| KRCC1 51315   | B2 |
| KREMEN2 79412 | B2 |
| KRI1 65095    | B2 |
| KRIT1 889     | B2 |
| KRR1 11103    | B2 |
| KRT10 3858    | B2 |
| KRT12 3859    | B2 |
| KRT13 3860    | B2 |

|                   |    |
|-------------------|----|
| KRT16 3868        | B2 |
| KRT1 3848         | B2 |
| KRT20 54474       | B2 |
| KRT222 125113     | B2 |
| KRT23 25984       | B2 |
| KRT24 192666      | B2 |
| KRT25 147183      | B2 |
| KRT27 342574      | B2 |
| KRT2 3849         | B2 |
| KRT31 3881        | B2 |
| KRT32 3882        | B2 |
| KRT33A 3883       | B2 |
| KRT33B 3884       | B2 |
| KRT34 3885        | B2 |
| KRT35 3886        | B2 |
| KRT36 8689        | B2 |
| KRT37 8688        | B2 |
| KRT38 8687        | B2 |
| KRT39 390792      | B2 |
| KRT3 3850         | B2 |
| KRT40 125115      | B2 |
| KRT4 3851         | B2 |
| KRT6A 3853        | B2 |
| KRT6B 3854        | B2 |
| KRT6C 286887      | B2 |
| KRT71 112802      | B2 |
| KRT72 140807      | B2 |
| KRT73 319101      | B2 |
| KRT74 121391      | B2 |
| KRT75 9119        | B2 |
| KRT76 51350       | B2 |
| KRT77 374454      | B2 |
| KRT78 196374      | B2 |
| KRT79 338785      | B2 |
| KRT7 3855         | B2 |
| KRT80 144501      | B2 |
| KRT81 3887        | B2 |
| KRT82 3888        | B2 |
| KRT83 3889        | B2 |
| KRT84 3890        | B2 |
| KRT85 3891        | B2 |
| KRT86 3892        | B2 |
| KRT9 3857         | B2 |
| KRTAP1-1 81851    | B2 |
| KRTAP1-3 81850    | B2 |
| KRTAP1-5 83895    | B2 |
| KRTAP10-12 386685 | B2 |
| KRTAP10-2 386679  | B2 |
| KRTAP10-4 386672  | B2 |
| KRTAP11-1 337880  | B2 |
| KRTAP12-1 353332  | B2 |

|                  |    |
|------------------|----|
| KRTAP13-2 337959 | B2 |
| KRTAP17-1 83902  | B2 |
| KRTAP2-1 81872   | B2 |
| KRTAP2-2 728279  | B2 |
| KRTAP21-2 337978 | B2 |
| KRTAP3-1 83896   | B2 |
| KRTAP3-2 83897   | B2 |
| KRTAP3-3 85293   | B2 |
| KRTAP4-11 653240 | B2 |
| KRTAP4-1 85285   | B2 |
| KRTAP4-4 84616   | B2 |
| KRTAP5-10 387273 | B2 |
| KRTAP5-11 440051 | B2 |
| KRTAP5-1 387264  | B2 |
| KRTAP5-2 440021  | B2 |
| KRTAP5-3 387266  | B2 |
| KRTAP5-4 387267  | B2 |
| KRTAP5-5 439915  | B2 |
| KRTAP5-6 440023  | B2 |
| KRTAP5-7 440050  | B2 |
| KRTAP5-8 57830   | B2 |
| KRTAP5-9 3846    | B2 |
| KRTAP7-1 337878  | B2 |
| KRTAP9-4 85280   | B2 |
| KRTCAP3 200634   | B2 |
| KRTDAP 388533    | B2 |
| KSR2 283455      | B2 |
| KTELC1 56983     | B2 |
| KTI12 112970     | B2 |
| KTN1 3895        | B2 |
| KYNU 8942        | B2 |
| L1CAM 3897       | B2 |
| L1TD1 54596      | B2 |
| L2HGDH 79944     | B2 |
| L3MBTL2 83746    | B2 |
| L3MBTL3 84456    | B2 |
| LACE1 246269     | B2 |
| LACRT 90070      | B2 |
| LACTB2 51110     | B2 |
| LACTB 114294     | B2 |
| LAD1 3898        | B2 |
| LAG3 3902        | B2 |
| LAIR1 3903       | B2 |
| LAIR2 3904       | B2 |
| LALBA 3906       | B2 |
| LAMA5 3911       | B2 |
| LAMB1 3912       | B2 |
| LAMB4 22798      | B2 |
| LAMP1 3916       | B2 |
| LAMP2 3920       | B2 |
| LAMP3 27074      | B2 |



|                |    |
|----------------|----|
| LANCL2 55915   | B2 |
| LANCL3 347404  | B2 |
| LAP3 51056     | B2 |
| LAPTM4A 9741   | B2 |
| LAPTM5 7805    | B2 |
| LARGE 9215     | B2 |
| LARP1 23367    | B2 |
| LARP7 51574    | B2 |
| LARS2 23395    | B2 |
| LARS 51520     | B2 |
| LASP1 3927     | B2 |
| LASS1 10715    | B2 |
| LASS3 204219   | B2 |
| LASS4 79603    | B2 |
| LASS5 91012    | B2 |
| LATS1 9113     | B2 |
| LAT 27040      | B2 |
| LAX1 54900     | B2 |
| LAYN 143903    | B2 |
| LBH 81606      | B2 |
| LBP 3929       | B2 |
| LBR 3930       | B2 |
| LBX1 10660     | B2 |
| LBX2 85474     | B2 |
| LCE1B 353132   | B2 |
| LCE1C 353133   | B2 |
| LCE1E 353135   | B2 |
| LCE2A 353139   | B2 |
| LCE3A 353142   | B2 |
| LCE3D 84648    | B2 |
| LCE3E 353145   | B2 |
| LCE5A 254910   | B2 |
| LCK 3932       | B2 |
| LCMT2 9836     | B2 |
| LCN12 286256   | B2 |
| LCN15 389812   | B2 |
| LCN1 3933      | B2 |
| LCN2 3934      | B2 |
| LCN8 138307    | B2 |
| LCNL1 401562   | B2 |
| LCORL 254251   | B2 |
| LCOR 84458     | B2 |
| LCP1 3936      | B2 |
| LCP2 3937      | B2 |
| LCTL 197021    | B2 |
| LCT 3938       | B2 |
| LDB1 8861      | B2 |
| LDB3 11155     | B2 |
| LDHAL6A 160287 | B2 |
| LDHAL6B 92483  | B2 |
| LDHC 3948      | B2 |

|                |    |
|----------------|----|
| LDLRAD1 388633 | B2 |
| LDLRAD3 143458 | B2 |
| LDLRAP1 26119  | B2 |
| LDLR 3949      | B2 |
| LDOC1L 84247   | B2 |
| LDOC1 23641    | B2 |
| LEAP2 116842   | B2 |
| LECT1 11061    | B2 |
| LECT2 3950     | B2 |
| LEFTY1 10637   | B2 |
| LEFTY2 7044    | B2 |
| LEKR1 389170   | B2 |
| LEMD1 93273    | B2 |
| LEMD3 23592    | B2 |
| LENEP 55891    | B2 |
| LENG1 79165    | B2 |
| LENG9 94059    | B2 |
| LEPROTL1 23484 | B2 |
| LETM2 137994   | B2 |
| LFNG 3955      | B2 |
| LGALS14 56891  | B2 |
| LGALS1 3956    | B2 |
| LGALS2 3957    | B2 |
| LGALS3BP 3959  | B2 |
| LGALS4 3960    | B2 |
| LGALS7B 653499 | B2 |
| LGALS7 3963    | B2 |
| LGALS9B 284194 | B2 |
| LGALS9C 654346 | B2 |
| LGALS9 3965    | B2 |
| LGI1 9211      | B2 |
| LGI2 55203     | B2 |
| LGI3 203190    | B2 |
| LGMN 5641      | B2 |
| LGR5 8549      | B2 |
| LGSN 51557     | B2 |
| LGTN 1939      | B2 |
| LHB 3972       | B2 |
| LHFPL1 340596  | B2 |
| LHFPL2 10184   | B2 |
| LHFPL3 375612  | B2 |
| LHFPL4 375323  | B2 |
| LHFPL5 222662  | B2 |
| LHPP 64077     | B2 |
| LHX1 3975      | B2 |
| LHX2 9355      | B2 |
| LHX3 8022      | B2 |
| LHX4 89884     | B2 |
| LHX5 64211     | B2 |
| LHX8 431707    | B2 |
| LHX9 56956     | B2 |

|               |    |
|---------------|----|
| LIG4 3981     | B2 |
| LILRA1 11024  | B2 |
| LILRA2 11027  | B2 |
| LILRA3 11026  | B2 |
| LILRA4 23547  | B2 |
| LILRA5 353514 | B2 |
| LILRA6 79168  | B2 |
| LILRB1 10859  | B2 |
| LILRB2 10288  | B2 |
| LILRB3 11025  | B2 |
| LILRB4 11006  | B2 |
| LILRP2 79166  | B2 |
| LIM2 3982     | B2 |
| LIMCH1 22998  | B2 |
| LIMD1 8994    | B2 |
| LIMD2 80774   | B2 |
| LIME1 54923   | B2 |
| LIMK2 3985    | B2 |
| LIMS1 3987    | B2 |
| LIN28A 79727  | B2 |
| LIN28B 389421 | B2 |
| LIN37 55957   | B2 |
| LIN52 91750   | B2 |
| LIN54 132660  | B2 |
| LIN7A 8825    | B2 |
| LIN7B 64130   | B2 |
| LIN7C 55327   | B2 |
| LINGO1 84894  | B2 |
| LINGO2 158038 | B2 |
| LINGO3 645191 | B2 |
| LINGO4 339398 | B2 |
| LINS1 55180   | B2 |
| LIPA 3988     | B2 |
| LIPF 8513     | B2 |
| LIPG 9388     | B2 |
| LIPH 200879   | B2 |
| LIPJ 149998   | B2 |
| LIPJ 142910   | B2 |
| LIPK 643414   | B2 |
| LIPM 340654   | B2 |
| LIPN 643418   | B2 |
| LIPT2 387787  | B2 |
| LITAF 9516    | B2 |
| LIX1 167410   | B2 |
| LLGL1 3996    | B2 |
| LMAN1L 79748  | B2 |
| LMAN2L 81562  | B2 |
| LMBR1L 55716  | B2 |
| LMBRD2 92255  | B2 |
| LMCD1 29995   | B2 |
| LMF1 64788    | B2 |

|                        |    |
|------------------------|----|
| LMF2 91289             | B2 |
| LMNA 4000              | B2 |
| LMO1 4004              | B2 |
| LMO3 55885             | B2 |
| LMO4 8543              | B2 |
| LMO7 4008              | B2 |
| LMOD2 442721           | B2 |
| LMOD3 56203            | B2 |
| LMTK2 22853            | B2 |
| LMTK3 114783           | B2 |
| LMX1B 4010             | B2 |
| LNP1 348801            | B2 |
| LNPEP 4012             | B2 |
| LNX1 84708             | B2 |
| LOC100009676 100009676 | B2 |
| LOC100101266 100101266 | B2 |
| LOC100101938 100101938 | B2 |
| LOC100124692 100124692 | B2 |
| LOC100125556 100125556 | B2 |
| LOC100127888 100127888 | B2 |
| LOC100128023 100128023 | B2 |
| LOC100128076 100128076 | B2 |
| LOC100128239 100128239 | B2 |
| LOC100128292 100128292 | B2 |
| LOC100128542 100128542 | B2 |
| LOC100128554 100128554 | B2 |
| LOC100128573 100128573 | B2 |
| LOC100128811 100128811 | B2 |
| LOC100128822 100128822 | B2 |
| LOC100128842 100128842 | B2 |
| LOC100128977 100128977 | B2 |
| LOC100129034 100129034 | B2 |
| LOC100129055 100129055 | B2 |
| LOC100129534 100129534 | B2 |
| LOC100129716 100129716 | B2 |
| LOC100130093 100130093 | B2 |
| LOC100130148 100130148 | B2 |
| LOC100130238 100130238 | B2 |
| LOC100130264 100130264 | B2 |
| LOC100130274 100130274 | B2 |
| LOC100130331 100130331 | B2 |
| LOC100130386 100130386 | B2 |
| LOC100130522 100130522 | B2 |
| LOC100130557 100130557 | B2 |
| LOC100130581 100130581 | B2 |
| LOC100130776 100130776 | B2 |
| LOC100130872 100130872 | B2 |
| LOC100130933 100130933 | B2 |
| LOC100130987 100130987 | B2 |
| LOC100131551 100131551 | B2 |
| LOC100131691 100131691 | B2 |

|                        |    |
|------------------------|----|
| LOC100131726 100131726 | B2 |
| LOC100132111 100132111 | B2 |
| LOC100132215 100132215 | B2 |
| LOC100132247 100132247 | B2 |
| LOC100132287 100132287 | B2 |
| LOC100132288 100132288 | B2 |
| LOC100132354 100132354 | B2 |
| LOC100132831 100132831 | B2 |
| LOC100132832 100132832 | B2 |
| LOC100133050 100133050 | B2 |
| LOC100133161 100133161 | B2 |
| LOC100133308 100133308 | B2 |
| LOC100133331 100133331 | B2 |
| LOC100133469 100133469 | B2 |
| LOC100133612 100133612 | B2 |
| LOC100133669 100133669 | B2 |
| LOC100133893 100133893 | B2 |
| LOC100133920 100133920 | B2 |
| LOC100133957 100133957 | B2 |
| LOC100133985 100133985 | B2 |
| LOC100133991 100133991 | B2 |
| LOC100134229 100134229 | B2 |
| LOC100134368 100134368 | B2 |
| LOC100134868 100134868 | B2 |
| LOC100144604 100144604 | B2 |
| LOC100170939 100170939 | B2 |
| LOC100188947 100188947 | B2 |
| LOC100188949 100188949 | B2 |
| LOC100189589 100189589 | B2 |
| LOC100190940 100190940 | B2 |
| LOC100190986 100190986 | B2 |
| LOC100192378 100192378 | B2 |
| LOC100192379 100192379 | B2 |
| LOC100192426 100192426 | B2 |
| LOC100216001 100216001 | B2 |
| LOC100216545 100216545 | B2 |
| LOC100233209 100233209 | B2 |
| LOC100240734 100240734 | B2 |
| LOC100268168 100268168 | B2 |
| LOC100270710 100270710 | B2 |
| LOC100270746 100270746 | B2 |
| LOC100270804 100270804 | B2 |
| LOC100271831 100271831 | B2 |
| LOC100271832 100271832 | B2 |
| LOC100271836 100271836 | B2 |
| LOC100272146 100272146 | B2 |
| LOC100272216 100272216 | B2 |
| LOC100272217 100272217 | B2 |
| LOC100272228 100272228 | B2 |
| LOC100286793 100286793 | B2 |
| LOC100286844 100286844 | B2 |

|                        |    |
|------------------------|----|
| LOC100287227 100287227 | B2 |
| LOC100287718 100287718 | B2 |
| LOC100288778 100288778 | B2 |
| LOC100289341 100289341 | B2 |
| LOC100302401 100302401 | B2 |
| LOC100302640 100302640 | B2 |
| LOC100303728 100303728 | B2 |
| LOC115110 115110       | B2 |
| LOC116437 116437       | B2 |
| LOC121838 121838       | B2 |
| LOC121952 121952       | B2 |
| LOC126536 126536       | B2 |
| LOC127841 127841       | B2 |
| LOC143666 143666       | B2 |
| LOC144438 144438       | B2 |
| LOC144486 144486       | B2 |
| LOC144742 144742       | B2 |
| LOC145474 145474       | B2 |
| LOC145783 145783       | B2 |
| LOC145837 145837       | B2 |
| LOC145845 145845       | B2 |
| LOC146336 146336       | B2 |
| LOC146481 146481       | B2 |
| LOC146880 146880       | B2 |
| LOC147804 147804       | B2 |
| LOC148189 148189       | B2 |
| LOC148413 148413       | B2 |
| LOC148696 148696       | B2 |
| LOC148824 148824       | B2 |
| LOC149134 149134       | B2 |
| LOC149620 149620       | B2 |
| LOC149837 149837       | B2 |
| LOC150185 150185       | B2 |
| LOC150197 150197       | B2 |
| LOC150381 150381       | B2 |
| LOC150527 150527       | B2 |
| LOC150568 150568       | B2 |
| LOC150622 150622       | B2 |
| LOC150776 150776       | B2 |
| LOC150786 150786       | B2 |
| LOC151162 151162       | B2 |
| LOC151174 151174       | B2 |
| LOC151534 151534       | B2 |
| LOC151658 151658       | B2 |
| LOC152024 152024       | B2 |
| LOC152217 152217       | B2 |
| LOC152225 152225       | B2 |
| LOC153328 153328       | B2 |
| LOC153684 153684       | B2 |
| LOC153910 153910       | B2 |
| LOC154449 154449       | B2 |

|                  |    |
|------------------|----|
| LOC154761 154761 | B2 |
| LOC154822 154822 | B2 |
| LOC157381 157381 | B2 |
| LOC157627 157627 | B2 |
| LOC158572 158572 | B2 |
| LOC162632 162632 | B2 |
| LOC168474 168474 | B2 |
| LOC200030 200030 | B2 |
| LOC200726 200726 | B2 |
| LOC202181 202181 | B2 |
| LOC202781 202781 | B2 |
| LOC219347 219347 | B2 |
| LOC220429 220429 | B2 |
| LOC220594 220594 | B2 |
| LOC220729 220729 | B2 |
| LOC220930 220930 | B2 |
| LOC221710 221710 | B2 |
| LOC222699 222699 | B2 |
| LOC253039 253039 | B2 |
| LOC253724 253724 | B2 |
| LOC254312 254312 | B2 |
| LOC254559 254559 | B2 |
| LOC255167 255167 | B2 |
| LOC256880 256880 | B2 |
| LOC25845 25845   | B2 |
| LOC26102 26102   | B2 |
| LOC282997 282997 | B2 |
| LOC283050 283050 | B2 |
| LOC283070 283070 | B2 |
| LOC283267 283267 | B2 |
| LOC283314 283314 | B2 |
| LOC283332 283332 | B2 |
| LOC283404 283404 | B2 |
| LOC283663 283663 | B2 |
| LOC283761 283761 | B2 |
| LOC283999 283999 | B2 |
| LOC284023 284023 | B2 |
| LOC284100 284100 | B2 |
| LOC284232 284232 | B2 |
| LOC284233 284233 | B2 |
| LOC284379 284379 | B2 |
| LOC284551 284551 | B2 |
| LOC284578 284578 | B2 |
| LOC284632 284632 | B2 |
| LOC284688 284688 | B2 |
| LOC284749 284749 | B2 |
| LOC284798 284798 | B2 |
| LOC284837 284837 | B2 |
| LOC284900 284900 | B2 |
| LOC285033 285033 | B2 |
| LOC285045 285045 | B2 |

|                  |    |
|------------------|----|
| LOC285194 285194 | B2 |
| LOC285359 285359 | B2 |
| LOC285370 285370 | B2 |
| LOC285375 285375 | B2 |
| LOC285401 285401 | B2 |
| LOC285456 285456 | B2 |
| LOC285501 285501 | B2 |
| LOC285548 285548 | B2 |
| LOC285593 285593 | B2 |
| LOC285627 285627 | B2 |
| LOC285629 285629 | B2 |
| LOC285692 285692 | B2 |
| LOC285696 285696 | B2 |
| LOC285733 285733 | B2 |
| LOC285735 285735 | B2 |
| LOC285740 285740 | B2 |
| LOC285768 285768 | B2 |
| LOC285780 285780 | B2 |
| LOC285847 285847 | B2 |
| LOC285954 285954 | B2 |
| LOC286002 286002 | B2 |
| LOC286135 286135 | B2 |
| LOC286238 286238 | B2 |
| LOC286359 286359 | B2 |
| LOC286467 286467 | B2 |
| LOC29034 29034   | B2 |
| LOC338651 338651 | B2 |
| LOC338799 338799 | B2 |
| LOC339047 339047 | B2 |
| LOC339240 339240 | B2 |
| LOC339535 339535 | B2 |
| LOC339788 339788 | B2 |
| LOC340017 340017 | B2 |
| LOC340074 340074 | B2 |
| LOC340357 340357 | B2 |
| LOC340508 340508 | B2 |
| LOC344595 344595 | B2 |
| LOC347376 347376 | B2 |
| LOC348021 348021 | B2 |
| LOC348840 348840 | B2 |
| LOC349114 349114 | B2 |
| LOC360030 360030 | B2 |
| LOC374491 374491 | B2 |
| LOC387646 387646 | B2 |
| LOC388152 388152 | B2 |
| LOC388242 388242 | B2 |
| LOC388387 388387 | B2 |
| LOC388428 388428 | B2 |
| LOC388588 388588 | B2 |
| LOC388692 388692 | B2 |
| LOC388789 388789 | B2 |



|                  |    |
|------------------|----|
| LOC388796 388796 | B2 |
| LOC389033 389033 | B2 |
| LOC389332 389332 | B2 |
| LOC389333 389333 | B2 |
| LOC389458 389458 | B2 |
| LOC389634 389634 | B2 |
| LOC389791 389791 | B2 |
| LOC391322 391322 | B2 |
| LOC392196 392196 | B2 |
| LOC399744 399744 | B2 |
| LOC400043 400043 | B2 |
| LOC400657 400657 | B2 |
| LOC400696 400696 | B2 |
| LOC400752 400752 | B2 |
| LOC400759 400759 | B2 |
| LOC400794 400794 | B2 |
| LOC400891 400891 | B2 |
| LOC400927 400927 | B2 |
| LOC400940 400940 | B2 |
| LOC401387 401387 | B2 |
| LOC401397 401397 | B2 |
| LOC401463 401463 | B2 |
| LOC401588 401588 | B2 |
| LOC402377 402377 | B2 |
| LOC402644 402644 | B2 |
| LOC407835 407835 | B2 |
| LOC440040 440040 | B2 |
| LOC440173 440173 | B2 |
| LOC440354 440354 | B2 |
| LOC440356 440356 | B2 |
| LOC440461 440461 | B2 |
| LOC440563 440563 | B2 |
| LOC440896 440896 | B2 |
| LOC440905 440905 | B2 |
| LOC440925 440925 | B2 |
| LOC440944 440944 | B2 |
| LOC440957 440957 | B2 |
| LOC441046 441046 | B2 |
| LOC441089 441089 | B2 |
| LOC441177 441177 | B2 |
| LOC441204 441204 | B2 |
| LOC441208 441208 | B2 |
| LOC441294 441294 | B2 |
| LOC441454 441454 | B2 |
| LOC441455 441455 | B2 |
| LOC441601 441601 | B2 |
| LOC441666 441666 | B2 |
| LOC442308 442308 | B2 |
| LOC442421 442421 | B2 |
| LOC442454 442454 | B2 |
| LOC442459 442459 | B2 |

|                  |    |
|------------------|----|
| LOC494141 494141 | B2 |
| LOC541473 541473 | B2 |
| LOC550112 550112 | B2 |
| LOC554202 554202 | B2 |
| LOC595101 595101 | B2 |
| LOC606724 606724 | B2 |
| LOC613037 613037 | B2 |
| LOC619207 619207 | B2 |
| LOC641298 641298 | B2 |
| LOC641367 641367 | B2 |
| LOC642846 642846 | B2 |
| LOC642852 642852 | B2 |
| LOC643008 643008 | B2 |
| LOC643677 643677 | B2 |
| LOC643719 643719 | B2 |
| LOC643763 643763 | B2 |
| LOC643837 643837 | B2 |
| LOC643923 643923 | B2 |
| LOC644145 644145 | B2 |
| LOC644165 644165 | B2 |
| LOC644172 644172 | B2 |
| LOC644669 644669 | B2 |
| LOC644936 644936 | B2 |
| LOC645166 645166 | B2 |
| LOC645323 645323 | B2 |
| LOC645332 645332 | B2 |
| LOC645431 645431 | B2 |
| LOC645676 645676 | B2 |
| LOC645752 645752 | B2 |
| LOC646214 646214 | B2 |
| LOC646471 646471 | B2 |
| LOC646627 646627 | B2 |
| LOC646762 646762 | B2 |
| LOC646851 646851 | B2 |
| LOC646999 646999 | B2 |
| LOC647121 647121 | B2 |
| LOC647288 647288 | B2 |
| LOC647859 647859 | B2 |
| LOC647946 647946 | B2 |
| LOC647979 647979 | B2 |
| LOC648691 648691 | B2 |
| LOC649330 649330 | B2 |
| LOC651250 651250 | B2 |
| LOC652276 652276 | B2 |
| LOC653113 653113 | B2 |
| LOC653544 653544 | B2 |
| LOC653653 653653 | B2 |
| LOC653786 653786 | B2 |
| LOC654433 654433 | B2 |
| LOC678655 678655 | B2 |
| LOC723809 723809 | B2 |

|                      |    |
|----------------------|----|
| LOC723972 723972     | B2 |
| LOC727677 727677     | B2 |
| LOC727896 727896     | B2 |
| LOC727924 727924     | B2 |
| LOC728024 728024     | B2 |
| LOC728190 728190     | B2 |
| LOC728276 728276     | B2 |
| LOC728323 728323     | B2 |
| LOC728606 728606     | B2 |
| LOC728613 728613     | B2 |
| LOC728640 728640     | B2 |
| LOC728643 728643     | B2 |
| LOC728743 728743     | B2 |
| LOC728758 728758     | B2 |
| LOC728855 728855     | B2 |
| LOC728875 728875     | B2 |
| LOC728989 728989     | B2 |
| LOC729020 729020     | B2 |
| LOC729082 729082     | B2 |
| LOC729156 729156     | B2 |
| LOC729176 729176     | B2 |
| LOC729234 729234     | B2 |
| LOC729375 729375     | B2 |
| LOC729603 729603     | B2 |
| LOC729609 729609     | B2 |
| LOC729668 729668     | B2 |
| LOC729678 729678     | B2 |
| LOC729991-MEF2B 4207 | B2 |
| LOC729991 729991     | B2 |
| LOC730101 730101     | B2 |
| LOC730668 730668     | B2 |
| LOC731779 731779     | B2 |
| LOC731789 731789     | B2 |
| LOC80154 80154       | B2 |
| LOC81691 81691       | B2 |
| LOC84740 84740       | B2 |
| LOC84856 84856       | B2 |
| LOC84931 84931       | B2 |
| LOC84989 84989       | B2 |
| LOC90110 90110       | B2 |
| LOC90246 90246       | B2 |
| LOC91450 91450       | B2 |
| LOC91948 91948       | B2 |
| LOC92249 92249       | B2 |
| LOC92973 92973       | B2 |
| LOC93432 93432       | B2 |
| LOC93622 93622       | B2 |
| LOC96610 96610       | B2 |
| LOH12CR1 118426      | B2 |
| LONP1 9361           | B2 |
| LONP2 83752          | B2 |

|               |    |
|---------------|----|
| LONRF2 164832 | B2 |
| LOR 4014      | B2 |
| LOXHD1 125336 | B2 |
| LOXL2 4017    | B2 |
| LOXL3 84695   | B2 |
| LOXL4 84171   | B2 |
| LOX 4015      | B2 |
| LPAL2 80350   | B2 |
| LPAR3 23566   | B2 |
| LPAR4 2846    | B2 |
| LPA 4018      | B2 |
| LPCAT3 10162  | B2 |
| LPGAT1 9926   | B2 |
| LPHN1 22859   | B2 |
| LPIN1 23175   | B2 |
| LPIN2 9663    | B2 |
| LPIN3 64900   | B2 |
| LPO 4025      | B2 |
| LPPR3 79948   | B2 |
| LPP 4026      | B2 |
| LPXN 9404     | B2 |
| LQK1 642946   | B2 |
| LRAT 9227     | B2 |
| LRCH3 84859   | B2 |
| LRCH4 4034    | B2 |
| LRDD 55367    | B2 |
| LRFN3 79414   | B2 |
| LRFN4 78999   | B2 |
| LRG1 116844   | B2 |
| LRGUK 136332  | B2 |
| LRIG1 26018   | B2 |
| LRIT1 26103   | B2 |
| LRIT2 340745  | B2 |
| LRIT3 345193  | B2 |
| LRP10 26020   | B2 |
| LRP11 84918   | B2 |
| LRP12 29967   | B2 |
| LRP1B 53353   | B2 |
| LRP2BP 55805  | B2 |
| LRP2 4036     | B2 |
| LRP5L 91355   | B2 |
| LRP6 4040     | B2 |
| LRPAP1 4043   | B2 |
| LRPPRC 10128  | B2 |
| LRR10B 390205 | B2 |
| LRR10 376132  | B2 |
| LRR14B 389257 | B2 |
| LRR14 9684    | B2 |
| LRR16B 90668  | B2 |
| LRR17 10234   | B2 |
| LRR18 474354  | B2 |

|                 |    |
|-----------------|----|
| LRR19 64922     | B2 |
| LRR20 55222     | B2 |
| LRR23 10233     | B2 |
| LRR24 441381    | B2 |
| LRR25 126364    | B2 |
| LRR26 389816    | B2 |
| LRR27 80313     | B2 |
| LRR28 123355    | B2 |
| LRR2 79442      | B2 |
| LRR31 79782     | B2 |
| LRR32 2615      | B2 |
| LRR36 55282     | B2 |
| LRR37A2 474170  | B2 |
| LRR37A3 374819  | B2 |
| LRR37A 9884     | B2 |
| LRR37B2 147172  | B2 |
| LRR37B 114659   | B2 |
| LRR39 127495    | B2 |
| LRR40 55631     | B2 |
| LRR41 10489     | B2 |
| LRR43 254050    | B2 |
| LRR47 57470     | B2 |
| LRR48 83450     | B2 |
| LRR49 54839     | B2 |
| LRR4C 57689     | B2 |
| LRR4 64101      | B2 |
| LRR50 123872    | B2 |
| LRR52 440699    | B2 |
| LRR55 219527    | B2 |
| LRR57 255252    | B2 |
| LRR58 116064    | B2 |
| LRR66 339977    | B2 |
| LRR67 286187    | B2 |
| LRR69 100130742 | B2 |
| LRR7 57554      | B2 |
| LRR8A 56262     | B2 |
| LRR8B 23507     | B2 |
| LRR8D 55144     | B2 |
| LRRFIP1 9208    | B2 |
| LRRFIP2 9209    | B2 |
| LRRIQ1 84125    | B2 |
| LRRIQ3 127255   | B2 |
| LRRIQ4 344657   | B2 |
| LRRK1 79705     | B2 |
| LRRK2 120892    | B2 |
| LRRN1 57633     | B2 |
| LRRN4 164312    | B2 |
| LRRTM3 347731   | B2 |
| LRRTM4 80059    | B2 |
| LRTM1 57408     | B2 |
| LRTM2 654429    | B2 |

|                  |    |
|------------------|----|
| LRTOMT 220074    | B2 |
| LSAMP 4045       | B2 |
| LSG1 55341       | B2 |
| LSM10 84967      | B2 |
| LSM11 134353     | B2 |
| LSM14A 26065     | B2 |
| LSM1 27257       | B2 |
| LSM6 11157       | B2 |
| LSM7 51690       | B2 |
| LSMD1 84316      | B2 |
| LSP1 4046        | B2 |
| LSS 4047         | B2 |
| LST-3TM12 338821 | B2 |
| LST1 7940        | B2 |
| LTA4H 4048       | B2 |
| LTA 4049         | B2 |
| LTB4R2 56413     | B2 |
| LTB4R 1241       | B2 |
| LTBP1 4052       | B2 |
| LTBP3 4054       | B2 |
| LTBR 4055        | B2 |
| LTB 4050         | B2 |
| LTF 4057         | B2 |
| LTK 4058         | B2 |
| LTV1 84946       | B2 |
| LUC7L2 51631     | B2 |
| LUC7L3 51747     | B2 |
| LUC7L 55692      | B2 |
| LUM 4060         | B2 |
| LUZP4 51213      | B2 |
| LUZP6 767558     | B2 |
| LXN 56925        | B2 |
| LY6D 8581        | B2 |
| LY6E 4061        | B2 |
| LY6G5C 80741     | B2 |
| LY6G6C 80740     | B2 |
| LY6G6D 58530     | B2 |
| LY6G6E 79136     | B2 |
| LY6G6F 259215    | B2 |
| LY6H 4062        | B2 |
| LY6K 54742       | B2 |
| LY86 9450        | B2 |
| LY96 23643       | B2 |
| LY9 4063         | B2 |
| LYAR 55646       | B2 |
| LYG1 129530      | B2 |
| LYG2 254773      | B2 |
| LYL1 4066        | B2 |
| LYN 4067         | B2 |
| LYPD2 137797     | B2 |
| LYPD3 27076      | B2 |

|                |    |
|----------------|----|
| LYPD4 147719   | B2 |
| LYPD5 284348   | B2 |
| LYPD6B 130576  | B2 |
| LYPD6 130574   | B2 |
| LYRM2 57226    | B2 |
| LYRM4 57128    | B2 |
| LYRM5 144363   | B2 |
| LYSMD2 256586  | B2 |
| LYSMD3 116068  | B2 |
| LYST 1130      | B2 |
| LYZL1 84569    | B2 |
| LYZL2 119180   | B2 |
| LYZL4 131375   | B2 |
| LYZ 4069       | B2 |
| LZIC 84328     | B2 |
| LZTFL1 54585   | B2 |
| LZTR1 8216     | B2 |
| LZTS1 11178    | B2 |
| LZTS2 84445    | B2 |
| M6PR 4074      | B2 |
| MAB21L2 10586  | B2 |
| MACC1 346389   | B2 |
| MACF1 23499    | B2 |
| MACROD1 28992  | B2 |
| MACROD2 140733 | B2 |
| MAD1L1 8379    | B2 |
| MADCAM1 8174   | B2 |
| MADD 8567      | B2 |
| MAEA 10296     | B2 |
| MAEL 84944     | B2 |
| MAF1 84232     | B2 |
| MAFA 389692    | B2 |
| MAFB 9935      | B2 |
| MAGEA10 4109   | B2 |
| MAGEA11 4110   | B2 |
| MAGEA12 4111   | B2 |
| MAGEA1 4100    | B2 |
| MAGEA2 4101    | B2 |
| MAGEA3 4102    | B2 |
| MAGEA4 4103    | B2 |
| MAGEA5 4104    | B2 |
| MAGEA6 4105    | B2 |
| MAGEA8 4107    | B2 |
| MAGEA9B 728269 | B2 |
| MAGEB10 139422 | B2 |
| MAGEB16 139604 | B2 |
| MAGEB18 286514 | B2 |
| MAGEB1 4112    | B2 |
| MAGEB2 4113    | B2 |
| MAGEB4 4115    | B2 |
| MAGEB6 158809  | B2 |

|                  |    |
|------------------|----|
| MAGEC1 9947      | B2 |
| MAGEC2 51438     | B2 |
| MAGEC3 139081    | B2 |
| MAGED4B 81557    | B2 |
| MAGED4 728239    | B2 |
| MAGEE1 57692     | B2 |
| MAGEH1 28986     | B2 |
| MAGEL2 54551     | B2 |
| MAGI2 9863       | B2 |
| MAGI3 260425     | B2 |
| MAGOH 4116       | B2 |
| MAGT1 84061      | B2 |
| MAG 4099         | B2 |
| MAK16 84549      | B2 |
| MAK 4117         | B2 |
| MALAT1 378938    | B2 |
| MALL 7851        | B2 |
| MALT1 10892      | B2 |
| MAL 4118         | B2 |
| MAMDC4 158056    | B2 |
| MAML1 9794       | B2 |
| MAMLD1 10046     | B2 |
| MAMSTR 284358    | B2 |
| MAN1A1 4121      | B2 |
| MAN1A2 10905     | B2 |
| MAN1B1 11253     | B2 |
| MAN1C1 57134     | B2 |
| MAN2A1 4124      | B2 |
| MAN2B2 23324     | B2 |
| MANBAL 63905     | B2 |
| MANBA 4126       | B2 |
| MANEA 79694      | B2 |
| MANSC1 54682     | B2 |
| MAOB 4129        | B2 |
| MAP1LC3A 84557   | B2 |
| MAP1LC3B2 643246 | B2 |
| MAP1S 55201      | B2 |
| MAP2K1 5604      | B2 |
| MAP2K2 5605      | B2 |
| MAP2K3 5606      | B2 |
| MAP2K4 6416      | B2 |
| MAP2K7 5609      | B2 |
| MAP3K10 4294     | B2 |
| MAP3K11 4296     | B2 |
| MAP3K12 7786     | B2 |
| MAP3K13 9175     | B2 |
| MAP3K15 389840   | B2 |
| MAP3K1 4214      | B2 |
| MAP3K2 10746     | B2 |
| MAP3K7 6885      | B2 |
| MAP3K9 4293      | B2 |



|                 |    |
|-----------------|----|
| MAP4K1 11184    | B2 |
| MAP4K3 8491     | B2 |
| MAP4K4 9448     | B2 |
| MAP4K5 11183    | B2 |
| MAP4 4134       | B2 |
| MAP6D1 79929    | B2 |
| MAP7D2 256714   | B2 |
| MAP9 79884      | B2 |
| MAPK12 6300     | B2 |
| MAPK14 1432     | B2 |
| MAPK1IP1L 93487 | B2 |
| MAPK1 5594      | B2 |
| MAPK3 5595      | B2 |
| MAPK4 5596      | B2 |
| MAPK6 5597      | B2 |
| MAPK7 5598      | B2 |
| MAPK8IP1 9479   | B2 |
| MAPK8IP3 23162  | B2 |
| MAPK8 5599      | B2 |
| MAPKAP1 79109   | B2 |
| MAPKAPK3 7867   | B2 |
| MAPKSP1 8649    | B2 |
| MAPRE2 10982    | B2 |
| MAPRE3 22924    | B2 |
| MAPT 4137       | B2 |
| MARCH10 162333  | B2 |
| MARCH11 441061  | B2 |
| MARCH1 55016    | B2 |
| MARCH2 51257    | B2 |
| MARCH3 115123   | B2 |
| MARCH5 54708    | B2 |
| MARCH6 10299    | B2 |
| MARCH7 64844    | B2 |
| MARCH8 220972   | B2 |
| MARCKS 4082     | B2 |
| MARCO 8685      | B2 |
| MARK3 4140      | B2 |
| MARK4 57787     | B2 |
| MARS2 92935     | B2 |
| MARVELD1 83742  | B2 |
| MARVELD3 91862  | B2 |
| MAS1 4142       | B2 |
| MAST1 22983     | B2 |
| MAST2 23139     | B2 |
| MAST3 23031     | B2 |
| MAST4 375449    | B2 |
| MAT1A 4143      | B2 |
| MAT2A 4144      | B2 |
| MATK 4145       | B2 |
| MATN1 4146      | B2 |
| MATN4 8785      | B2 |

|                 |    |
|-----------------|----|
| MATR3 9782      | B2 |
| MAX 4149        | B2 |
| MBD2 8932       | B2 |
| MBD3L2 125997   | B2 |
| MBD3L5 284428   | B2 |
| MBD3 53615      | B2 |
| MBD5 55777      | B2 |
| MBD6 114785     | B2 |
| MBL2 4153       | B2 |
| MBLAC1 255374   | B2 |
| MBOAT1 154141   | B2 |
| MBOAT4 619373   | B2 |
| MBTD1 54799     | B2 |
| MBTPS1 8720     | B2 |
| MBTPS2 51360    | B2 |
| MB 4151         | B2 |
| MC2R 4158       | B2 |
| MC3R 4159       | B2 |
| MC4R 4160       | B2 |
| MC5R 4161       | B2 |
| MCART1 92014    | B2 |
| MCART2 147407   | B2 |
| MCART3P 442229  | B2 |
| MCART6 401612   | B2 |
| MCAT 27349      | B2 |
| MCCC1 56922     | B2 |
| MCCC2 64087     | B2 |
| MCCD1 401250    | B2 |
| MCEE 84693      | B2 |
| MCF2L2 23101    | B2 |
| MCF2L 23263     | B2 |
| MCF2 4168       | B2 |
| MCHR1 2847      | B2 |
| MCHR2 84539     | B2 |
| MCL1 4170       | B2 |
| MCM3APAS 114044 | B2 |
| MCM3AP 8888     | B2 |
| MCM5 4174       | B2 |
| MCM7 4176       | B2 |
| MCM8 84515      | B2 |
| MCM9 254394     | B2 |
| MCOLN1 57192    | B2 |
| MCOLN3 55283    | B2 |
| MCRS1 10445     | B2 |
| MCTP2 55784     | B2 |
| MDC1 9656       | B2 |
| MDFI 4188       | B2 |
| MDGA1 266727    | B2 |
| MDGA2 161357    | B2 |
| MDH1B 130752    | B2 |
| MDH1 4190       | B2 |

|                 |    |
|-----------------|----|
| MDH2 4191       | B2 |
| MDK 4192        | B2 |
| MDM1 56890      | B2 |
| MDM2 4193       | B2 |
| MDM4 4194       | B2 |
| MDP1 145553     | B2 |
| MDS2 259283     | B2 |
| ME1 4199        | B2 |
| ME2 4200        | B2 |
| MECR 51102      | B2 |
| MED10 84246     | B2 |
| MED11 400569    | B2 |
| MED12L 116931   | B2 |
| MED12 9968      | B2 |
| MED13L 23389    | B2 |
| MED13 9969      | B2 |
| MED15 51586     | B2 |
| MED16 10025     | B2 |
| MED17 9440      | B2 |
| MED18 54797     | B2 |
| MED19 219541    | B2 |
| MED1 5469       | B2 |
| MED21 9412      | B2 |
| MED22 6837      | B2 |
| MED23 9439      | B2 |
| MED24 9862      | B2 |
| MED26 9441      | B2 |
| MED27 9442      | B2 |
| MED28 80306     | B2 |
| MED29 55588     | B2 |
| MED30 90390     | B2 |
| MED31 51003     | B2 |
| MED4 29079      | B2 |
| MED6 10001      | B2 |
| MED7 9443       | B2 |
| MEF2A 4205      | B2 |
| MEF2B 100271849 | B2 |
| MEF2C 4208      | B2 |
| MEF2D 4209      | B2 |
| MEFV 4210       | B2 |
| MEG8 79104      | B2 |
| MEGF10 84466    | B2 |
| MEGF11 84465    | B2 |
| MEGF6 1953      | B2 |
| MEGF9 1955      | B2 |
| MEI1 150365     | B2 |
| MEIG1 644890    | B2 |
| MEP1A 4224      | B2 |
| MEP1B 4225      | B2 |
| MEPCE 56257     | B2 |
| MEPE 56955      | B2 |

|                |    |
|----------------|----|
| MESDC1 59274   | B2 |
| MESP1 55897    | B2 |
| MESP2 145873   | B2 |
| METAP1 23173   | B2 |
| METAP2 10988   | B2 |
| METRNL 284207  | B2 |
| METT11D1 64745 | B2 |
| METT5D1 196074 | B2 |
| METTL10 399818 | B2 |
| METTL11A 28989 | B2 |
| METTL12 751071 | B2 |
| METTL14 57721  | B2 |
| METTL2B 55798  | B2 |
| METTL3 56339   | B2 |
| METTL4 64863   | B2 |
| METTL5 29081   | B2 |
| METTL7B 196410 | B2 |
| METTL8 79828   | B2 |
| METTL9 51108   | B2 |
| MEX3B 84206    | B2 |
| MEX3C 51320    | B2 |
| MFAP1 4236     | B2 |
| MFAP3L 9848    | B2 |
| MFAP3 4238     | B2 |
| MFF 56947      | B2 |
| MFGE8 4240     | B2 |
| MFHAS1 9258    | B2 |
| MF12 4241      | B2 |
| MFN1 55669     | B2 |
| MFN2 9927      | B2 |
| MFRP 83552     | B2 |
| MFSD11 79157   | B2 |
| MFSD1 64747    | B2 |
| MFSD2A 84879   | B2 |
| MFSD2B 388931  | B2 |
| MFSD4 148808   | B2 |
| MFSD6L 162387  | B2 |
| MFSD6 54842    | B2 |
| MFSD7 84179    | B2 |
| MFSD8 256471   | B2 |
| MFSD9 84804    | B2 |
| MGAM 8972      | B2 |
| MGAT1 4245     | B2 |
| MGAT4C 25834   | B2 |
| MGAT5B 146664  | B2 |
| MGAT5 4249     | B2 |
| MGA 23269      | B2 |
| MGC12916 84815 | B2 |
| MGC12982 84793 | B2 |
| MGC14436 84983 | B2 |
| MGC16025 85009 | B2 |

|                 |    |
|-----------------|----|
| MGC16121 84848  | B2 |
| MGC16142 84849  | B2 |
| MGC16275 85001  | B2 |
| MGC16384 114130 | B2 |
| MGC16703 113691 | B2 |
| MGC23270 196872 | B2 |
| MGC26647 219557 | B2 |
| MGC27382 149047 | B2 |
| MGC2752 65996   | B2 |
| MGC2889 84789   | B2 |
| MGC29506 51237  | B2 |
| MGC34034 154089 | B2 |
| MGC3771 81854   | B2 |
| MGC42105 167359 | B2 |
| MGC4473 79100   | B2 |
| MGC45800 90768  | B2 |
| MGC57346 401884 | B2 |
| MGC70857 414919 | B2 |
| MGC72080 389538 | B2 |
| MGEA5 10724     | B2 |
| MGMT 4255       | B2 |
| MGP 4256        | B2 |
| MGST1 4257      | B2 |
| MGST2 4258      | B2 |
| MGST3 4259      | B2 |
| MIA2 117153     | B2 |
| MIA3 375056     | B2 |
| MIAT 440823     | B2 |
| MIA 8190        | B2 |
| MIB1 57534      | B2 |
| MIB2 142678     | B2 |
| MICAL1 64780    | B2 |
| MICALCL 84953   | B2 |
| MICALL1 85377   | B2 |
| MICA 4276       | B2 |
| MID1P1 58526    | B2 |
| MID2 11043      | B2 |
| MIDN 90007      | B2 |
| MIER1 57708     | B2 |
| MIER2 54531     | B2 |
| MIER3 166968    | B2 |
| MIF4GD 57409    | B2 |
| MIIP 60672      | B2 |
| MIMT1 100073347 | B2 |
| MINA 84864      | B2 |
| MIOS 54468      | B2 |
| MIOX 55586      | B2 |
| MIPEP 4285      | B2 |
| MIP 4284        | B2 |
| MIR155HG 114614 | B2 |
| MIS12 79003     | B2 |

|              |    |
|--------------|----|
| MITD1 129531 | B2 |
| MIXL1 83881  | B2 |
| MKKS 8195    | B2 |
| MKL1 57591   | B2 |
| MKL2 57496   | B2 |
| MKNK2 2872   | B2 |
| MKRN1 23608  | B2 |
| MKRN2 23609  | B2 |
| MKRN3 7681   | B2 |
| MKS1 54903   | B2 |
| MKX 283078   | B2 |
| MLANA 2315   | B2 |
| MLC1 23209   | B2 |
| MLEC 9761    | B2 |
| MLF1 4291    | B2 |
| MLH1 4292    | B2 |
| MLH3 27030   | B2 |
| MLKL 197259  | B2 |
| MLL2 8085    | B2 |
| MLL3 58508   | B2 |
| MLL4 9757    | B2 |
| MLL5 55904   | B2 |
| MLLT10 8028  | B2 |
| MLLT1 4298   | B2 |
| MLLT3 4300   | B2 |
| MLLT4 4301   | B2 |
| MLNR 2862    | B2 |
| MLXIP 22877  | B2 |
| MLX 6945     | B2 |
| MMAA 166785  | B2 |
| MMAB 326625  | B2 |
| MMACHC 25974 | B2 |
| MMADHC 27249 | B2 |
| MMD2 221938  | B2 |
| MMEL1 79258  | B2 |
| MMP10 4319   | B2 |
| MMP12 4321   | B2 |
| MMP13 4322   | B2 |
| MMP15 4324   | B2 |
| MMP16 4325   | B2 |
| MMP17 4326   | B2 |
| MMP1 4312    | B2 |
| MMP20 9313   | B2 |
| MMP21 118856 | B2 |
| MMP23A 8511  | B2 |
| MMP23B 8510  | B2 |
| MMP24 10893  | B2 |
| MMP25 64386  | B2 |
| MMP26 56547  | B2 |
| MMP2 4313    | B2 |
| MMP7 4316    | B2 |

|                 |    |
|-----------------|----|
| MMP8 4317       | B2 |
| MMP9 4318       | B2 |
| MMS19 64210     | B2 |
| MN1 4330        | B2 |
| MNAT1 4331      | B2 |
| MNDA 4332       | B2 |
| MNS1 55329      | B2 |
| MNT 4335        | B2 |
| MNX1 3110       | B2 |
| MOAP1 64112     | B2 |
| MOB2 81532      | B2 |
| MOBKL1A 92597   | B2 |
| MOBKL2A 126308  | B2 |
| MOBKL3 25843    | B2 |
| MOBP 4336       | B2 |
| MOCOS 55034     | B2 |
| MOCS2 4338      | B2 |
| MOGAT1 116255   | B2 |
| MOGAT2 80168    | B2 |
| MOGAT3 346606   | B2 |
| MOG 4340        | B2 |
| MON1A 84315     | B2 |
| MON1B 22879     | B2 |
| MORC1 27136     | B2 |
| MORC3 23515     | B2 |
| MORC4 79710     | B2 |
| MORF4L1 10933   | B2 |
| MORF4 10934     | B2 |
| MORN1 79906     | B2 |
| MORN3 283385    | B2 |
| MORN4 118812    | B2 |
| MORN5 254956    | B2 |
| MOSC2 54996     | B2 |
| MOSPD2 158747   | B2 |
| MOV10L1 54456   | B2 |
| MPEG1 219972    | B2 |
| MPG 4350        | B2 |
| MPHOSPH10 10199 | B2 |
| MPHOSPH6 10200  | B2 |
| MPI 4351        | B2 |
| MPND 84954      | B2 |
| MPO 4353        | B2 |
| MPP1 4354       | B2 |
| MPP2 4355       | B2 |
| MPP3 4356       | B2 |
| MPP4 58538      | B2 |
| MPP5 64398      | B2 |
| MPP7 143098     | B2 |
| MPPE1 65258     | B2 |
| MPPED1 758      | B2 |
| MPST 4357       | B2 |

|                 |    |
|-----------------|----|
| MPV17L 255027   | B2 |
| MPZL1 9019      | B2 |
| MPZL2 10205     | B2 |
| MPZL3 196264    | B2 |
| MRC2 9902       | B2 |
| MRE11A 4361     | B2 |
| MREG 55686      | B2 |
| MRFAPIL1 114932 | B2 |
| MRFAP1 93621    | B2 |
| MRGPRD 116512   | B2 |
| MRGPRES 116534  | B2 |
| MRGPRX4 117196  | B2 |
| MRI1 84245      | B2 |
| MRM1 79922      | B2 |
| MRO 83876       | B2 |
| MRP63 78988     | B2 |
| MRPL10 124995   | B2 |
| MRPL11 65003    | B2 |
| MRPL16 54948    | B2 |
| MRPL18 29074    | B2 |
| MRPL1 65008     | B2 |
| MRPL20 55052    | B2 |
| MRPL21 219927   | B2 |
| MRPL23 6150     | B2 |
| MRPL27 51264    | B2 |
| MRPL2 51069     | B2 |
| MRPL30 51263    | B2 |
| MRPL32 64983    | B2 |
| MRPL33 9553     | B2 |
| MRPL34 64981    | B2 |
| MRPL35 51318    | B2 |
| MRPL37 51253    | B2 |
| MRPL38 64978    | B2 |
| MRPL39 54148    | B2 |
| MRPL40 64976    | B2 |
| MRPL41 64975    | B2 |
| MRPL42P5 359821 | B2 |
| MRPL43 84545    | B2 |
| MRPL44 65080    | B2 |
| MRPL45 84311    | B2 |
| MRPL46 26589    | B2 |
| MRPL48 51642    | B2 |
| MRPL4 51073     | B2 |
| MRPL50 54534    | B2 |
| MRPL52 122704   | B2 |
| MRPL53 116540   | B2 |
| MRPL54 116541   | B2 |
| MRPS11 64963    | B2 |
| MRPS15 64960    | B2 |
| MRPS17 51373    | B2 |
| MRPS18A 55168   | B2 |



|               |    |
|---------------|----|
| MRPS18B 28973 | B2 |
| MRPS18C 51023 | B2 |
| MRPS22 56945  | B2 |
| MRPS24 64951  | B2 |
| MRPS25 64432  | B2 |
| MRPS26 64949  | B2 |
| MRPS27 23107  | B2 |
| MRPS28 28957  | B2 |
| MRPS2 51116   | B2 |
| MRPS30 10884  | B2 |
| MRPS33 51650  | B2 |
| MRPS36 92259  | B2 |
| MRPS5 64969   | B2 |
| MRPS6 64968   | B2 |
| MRPS7 51081   | B2 |
| MRPS9 64965   | B2 |
| MRRF 92399    | B2 |
| MRS2 57380    | B2 |
| MRTO4 51154   | B2 |
| MS4A10 341116 | B2 |
| MS4A12 54860  | B2 |
| MS4A14 84689  | B2 |
| MS4A15 219995 | B2 |
| MS4A1 931     | B2 |
| MS4A2 2206    | B2 |
| MS4A3 932     | B2 |
| MS4A4A 51338  | B2 |
| MS4A6A 64231  | B2 |
| MS4A6E 245802 | B2 |
| MS4A7 58475   | B2 |
| MS4A8B 83661  | B2 |
| MSC 9242      | B2 |
| MSGN1 343930  | B2 |
| MSH3 4437     | B2 |
| MSH4 4438     | B2 |
| MSH5 4439     | B2 |
| MSI1 4440     | B2 |
| MSL1 339287   | B2 |
| MSL2 55167    | B2 |
| MSL3L2 151507 | B2 |
| MSL3 10943    | B2 |
| MSLNL 401827  | B2 |
| MSLN 10232    | B2 |
| MSMB 4477     | B2 |
| MSMP 692094   | B2 |
| MSN 4478      | B2 |
| MSRB2 22921   | B2 |
| MST1 4485     | B2 |
| MST4 51765    | B2 |
| MSTN 2660     | B2 |
| MSTO1 55154   | B2 |

|                   |    |
|-------------------|----|
| MSTO2P 100129405  | B2 |
| MSX2P1 55545      | B2 |
| MSX2 4488         | B2 |
| MT1A 4489         | B2 |
| MT1DP 326343      | B2 |
| MT1F 4494         | B2 |
| MT1G 4495         | B2 |
| MT1H 4496         | B2 |
| MT1IP 644314      | B2 |
| MT2A 4502         | B2 |
| MT3 4504          | B2 |
| MT4 84560         | B2 |
| MTA1 9112         | B2 |
| MTA2 9219         | B2 |
| MTAP 4507         | B2 |
| MTCH1 23787       | B2 |
| MTCP1NB 100272147 | B2 |
| MTCP1 4515        | B2 |
| MTERFD3 80298     | B2 |
| MTERF 7978        | B2 |
| MTF1 4520         | B2 |
| MTF2 22823        | B2 |
| MTFMT 123263      | B2 |
| MTG1 92170        | B2 |
| MTHFD1L 25902     | B2 |
| MTHFD1 4522       | B2 |
| MTHFD2L 441024    | B2 |
| MTHFR 4524        | B2 |
| MTHFSD 64779      | B2 |
| MTHFS 10588       | B2 |
| MTIF2 4528        | B2 |
| MTIF3 219402      | B2 |
| MTM1 4534         | B2 |
| MTMR11 10903      | B2 |
| MTMR14 64419      | B2 |
| MTMR1 8776        | B2 |
| MTMR2 8898        | B2 |
| MTMR4 9110        | B2 |
| MTMR6 9107        | B2 |
| MTMR7 9108        | B2 |
| MTNR1A 4543       | B2 |
| MTNR1B 4544       | B2 |
| MTO1 25821        | B2 |
| MTOR 2475         | B2 |
| MTPAP 55149       | B2 |
| MTRF1L 54516      | B2 |
| MTRF1 9617        | B2 |
| MTRR 4552         | B2 |
| MTR 4548          | B2 |
| MTSS1L 92154      | B2 |
| MTSS1 9788        | B2 |

|                |    |
|----------------|----|
| MTTP 4547      | B2 |
| MTUS2 23281    | B2 |
| MTVR2 246754   | B2 |
| MTX3 345778    | B2 |
| MUC12 10071    | B2 |
| MUC13 56667    | B2 |
| MUC15 143662   | B2 |
| MUC16 94025    | B2 |
| MUC17 140453   | B2 |
| MUC20 200958   | B2 |
| MUC21 394263   | B2 |
| MUC2 4583      | B2 |
| MUC4 4585      | B2 |
| MUC5B 727897   | B2 |
| MUC6 4588      | B2 |
| MUC7 4589      | B2 |
| MUCL1 118430   | B2 |
| MUDENG 55745   | B2 |
| MUL1 79594     | B2 |
| MUM1L1 139221  | B2 |
| MURC 347273    | B2 |
| MUS81 80198    | B2 |
| MUSK 4593      | B2 |
| MUSTN1 389125  | B2 |
| MUTED 63915    | B2 |
| MUTYH 4595     | B2 |
| MUT 4594       | B2 |
| MVD 4597       | B2 |
| MVK 4598       | B2 |
| MX2 4600       | B2 |
| MXD1 4084      | B2 |
| MXRA8 54587    | B2 |
| MYADML2 255275 | B2 |
| MYADML 151325  | B2 |
| MYBBP1A 10514  | B2 |
| MYBL1 4603     | B2 |
| MYBPC1 4604    | B2 |
| MYBPC2 4606    | B2 |
| MYBPC3 4607    | B2 |
| MYBPHL 343263  | B2 |
| MYBPH 4608     | B2 |
| MYCBPAP 84073  | B2 |
| MYCL1 4610     | B2 |
| MYCNOS 10408   | B2 |
| MYCN 4613      | B2 |
| MYEOV2 150678  | B2 |
| MYF5 4617      | B2 |
| MYF6 4618      | B2 |
| MYH13 8735     | B2 |
| MYH14 79784    | B2 |
| MYH15 22989    | B2 |

|               |    |
|---------------|----|
| MYH16 84176   | B2 |
| MYH1 4619     | B2 |
| MYH2 4620     | B2 |
| MYH4 4622     | B2 |
| MYH6 4624     | B2 |
| MYH7 4625     | B2 |
| MYH8 4626     | B2 |
| MYH9 4627     | B2 |
| MYL10 93408   | B2 |
| MYL12A 10627  | B2 |
| MYL12B 103910 | B2 |
| MYL1 4632     | B2 |
| MYL2 4633     | B2 |
| MYL3 4634     | B2 |
| MYL4 4635     | B2 |
| MYL5 4636     | B2 |
| MYL6B 140465  | B2 |
| MYL6 4637     | B2 |
| MYL7 58498    | B2 |
| MYLIP 29116   | B2 |
| MYLK2 85366   | B2 |
| MYLK3 91807   | B2 |
| MYLK4 340156  | B2 |
| MYLPF 29895   | B2 |
| MYNN 55892    | B2 |
| MYO10 4651    | B2 |
| MYO15A 51168  | B2 |
| MYO16 23026   | B2 |
| MYO18A 399687 | B2 |
| MYO18B 84700  | B2 |
| MYO1A 4640    | B2 |
| MYO1B 4430    | B2 |
| MYO1E 4643    | B2 |
| MYO1F 4542    | B2 |
| MYO1G 64005   | B2 |
| MYO3A 53904   | B2 |
| MYO3B 140469  | B2 |
| MYO5A 4644    | B2 |
| MYO5C 55930   | B2 |
| MYO7A 4647    | B2 |
| MYO7B 4648    | B2 |
| MYO9B 4650    | B2 |
| MYOD1 4654    | B2 |
| MYOF 26509    | B2 |
| MYOG 4656     | B2 |
| MYOM1 8736    | B2 |
| MYOM2 9172    | B2 |
| MYOM3 127294  | B2 |
| MYOT 9499     | B2 |
| MYOZ1 58529   | B2 |
| MYOZ2 51778   | B2 |

|                 |    |
|-----------------|----|
| MYOZ3 91977     | B2 |
| MYPN 84665      | B2 |
| MYPOP 339344    | B2 |
| MYSM1 114803    | B2 |
| MYST1 84148     | B2 |
| MYST2 11143     | B2 |
| MYST3 7994      | B2 |
| MYST4 23522     | B2 |
| MYT1L 23040     | B2 |
| MYT1 4661       | B2 |
| MZF1 7593       | B2 |
| N4BP1 9683      | B2 |
| N4BP2 55728     | B2 |
| N6AMT1 29104    | B2 |
| N6AMT2 221143   | B2 |
| NAA10 8260      | B2 |
| NAA11 84779     | B2 |
| NAA25 80018     | B2 |
| NAA30 122830    | B2 |
| NAA40 79829     | B2 |
| NAA50 80218     | B2 |
| NAAA 27163      | B2 |
| NAALADL2 254827 | B2 |
| NAB2 4665       | B2 |
| NACA2 342538    | B2 |
| NACAP1 83955    | B2 |
| NACC2 138151    | B2 |
| NADK 65220      | B2 |
| NADSYN1 55191   | B2 |
| NAE1 8883       | B2 |
| NAF1 92345      | B2 |
| NAGLU 4669      | B2 |
| NAGPA 51172     | B2 |
| NAGS 162417     | B2 |
| NAIF1 203245    | B2 |
| NAIP 4671       | B2 |
| NALCN 259232    | B2 |
| NAMPT 10135     | B2 |
| NANOG 79923     | B2 |
| NANOS1 340719   | B2 |
| NANOS2 339345   | B2 |
| NANOS3 342977   | B2 |
| NANP 140838     | B2 |
| NAP1L1 4673     | B2 |
| NAP1L3 4675     | B2 |
| NAP1L4 4676     | B2 |
| NAP1L6 645996   | B2 |
| NAPB 63908      | B2 |
| NAPEPLD 222236  | B2 |
| NAPG 8774       | B2 |
| NAPRT1 93100    | B2 |

|                  |    |
|------------------|----|
| NAPSA 9476       | B2 |
| NAPSB 256236     | B2 |
| NARF 26502       | B2 |
| NARG2 79664      | B2 |
| NARS2 79731      | B2 |
| NASP 4678        | B2 |
| NAT10 55226      | B2 |
| NAT1 9           | B2 |
| NAT2 10          | B2 |
| NAT8B 51471      | B2 |
| NAT8 9027        | B2 |
| NAT9 26151       | B2 |
| NAV1 89796       | B2 |
| NBAS 51594       | B2 |
| NBEAL2 23218     | B2 |
| NBEA 26960       | B2 |
| NBL1 4681        | B2 |
| NBPF10 100132406 | B2 |
| NBPF14 25832     | B2 |
| NBPF15 284565    | B2 |
| NBPF16 728936    | B2 |
| NBPF1 55672      | B2 |
| NBPF22P 285622   | B2 |
| NBPF3 84224      | B2 |
| NBPF4 148545     | B2 |
| NBPF6 653149     | B2 |
| NBPF7 343505     | B2 |
| NBPF9 400818     | B2 |
| NBR1 4077        | B2 |
| NBR2 10230       | B2 |
| NCAM2 4685       | B2 |
| NCAN 1463        | B2 |
| NCAPH2 29781     | B2 |
| NCCRP1 342897    | B2 |
| NCF1B 654816     | B2 |
| NCF1C 654817     | B2 |
| NCF1 653361      | B2 |
| NCF2 4688        | B2 |
| NCF4 4689        | B2 |
| NCK1 4690        | B2 |
| NCK2 8440        | B2 |
| NCKAPIL 3071     | B2 |
| NCKAP1 10787     | B2 |
| NCKAP5 344148    | B2 |
| NCKIPSD 51517    | B2 |
| NCL 4691         | B2 |
| NCOA2 10499      | B2 |
| NCOA3 8202       | B2 |
| NCOR1 9611       | B2 |
| NCOR2 9612       | B2 |
| NCR1 9437        | B2 |

|                      |    |
|----------------------|----|
| NCR2 9436            | B2 |
| NCR3 259197          | B2 |
| NCRNA00028 140875    | B2 |
| NCRNA00051 619434    | B2 |
| NCRNA00052 145978    | B2 |
| NCRNA00081 92482     | B2 |
| NCRNA00085 147650    | B2 |
| NCRNA00093 100188954 | B2 |
| NCRNA00094 266655    | B2 |
| NCRNA00095 283932    | B2 |
| NCRNA00099 359822    | B2 |
| NCRNA00105 80161     | B2 |
| NCRNA00107 283981    | B2 |
| NCRNA00110 642976    | B2 |
| NCRNA00111 54090     | B2 |
| NCRNA00112 54089     | B2 |
| NCRNA00113 54088     | B2 |
| NCRNA00114 400866    | B2 |
| NCRNA00115 79854     | B2 |
| NCRNA00116 205251    | B2 |
| NCRNA00119 348808    | B2 |
| NCRNA00157 54075     | B2 |
| NCRNA00158 54072     | B2 |
| NCRNA00159 54070     | B2 |
| NCRNA00160 54064     | B2 |
| NCRNA00161 118421    | B2 |
| NCRNA00162 378825    | B2 |
| NCRNA00164 554226    | B2 |
| NCRNA00167 440072    | B2 |
| NCRNA00169 400508    | B2 |
| NCRNA00171 80862     | B2 |
| NCRNA00173 100287569 | B2 |
| NCRNA00174 285908    | B2 |
| NCRNA00175 378832    | B2 |
| NCRNA00181 503538    | B2 |
| NCRNA00183 554203    | B2 |
| NCRNA00189 193629    | B2 |
| NCRNA00200 399706    | B2 |
| NCRNA00201 284702    | B2 |
| NCRNA00202 387644    | B2 |
| NCRNA00203 319085    | B2 |
| NCRNA00235 64493     | B2 |
| NCS1 23413           | B2 |
| NDFIP1 80762         | B2 |
| NDFIP2 54602         | B2 |
| NDNL2 56160          | B2 |
| NDP 4693             | B2 |
| NDRG1 10397          | B2 |
| NDRG4 65009          | B2 |
| NDST2 8509           | B2 |
| NDST3 9348           | B2 |

|                |    |
|----------------|----|
| NDST4 64579    | B2 |
| NDUFA10 4705   | B2 |
| NDUFA11 126328 | B2 |
| NDUFA12 55967  | B2 |
| NDUFA1 4694    | B2 |
| NDUFA2 4695    | B2 |
| NDUFA3 4696    | B2 |
| NDUFA4L2 56901 | B2 |
| NDUFA4 4697    | B2 |
| NDUFA5 4698    | B2 |
| NDUFA6 4700    | B2 |
| NDUFA8 4702    | B2 |
| NDUFA9 4704    | B2 |
| NDUFAF1 51103  | B2 |
| NDUFAF2 91942  | B2 |
| NDUFAF3 25915  | B2 |
| NDUFAF4 29078  | B2 |
| NDUFB10 4716   | B2 |
| NDUFB11 54539  | B2 |
| NDUFB1 4707    | B2 |
| NDUFB2 4708    | B2 |
| NDUFB3 4709    | B2 |
| NDUFB5 4711    | B2 |
| NDUFB6 4712    | B2 |
| NDUFB7 4713    | B2 |
| NDUFB8 4714    | B2 |
| NDUFC1 4717    | B2 |
| NDUFC2 4718    | B2 |
| NDUFS1 4719    | B2 |
| NDUFS3 4722    | B2 |
| NDUFS5 4725    | B2 |
| NDUFS6 4726    | B2 |
| NDUFS7 374291  | B2 |
| NDUFS8 4728    | B2 |
| NDUFV1 4723    | B2 |
| NDUFV3 4731    | B2 |
| NEAT1 283131   | B2 |
| NEBL 10529     | B2 |
| NEB 4703       | B2 |
| NECAB2 54550   | B2 |
| NECAP2 55707   | B2 |
| NEDD1 121441   | B2 |
| NEDD4L 23327   | B2 |
| NEDD4 4734     | B2 |
| NEDD8 4738     | B2 |
| NEFH 4744      | B2 |
| NEFL 4747      | B2 |
| NEFM 4741      | B2 |
| NEGR1 257194   | B2 |
| NEIL2 252969   | B2 |
| NEK10 152110   | B2 |



|                |    |
|----------------|----|
| NEK11 79858    | B2 |
| NEK4 6787      | B2 |
| NEK6 10783     | B2 |
| NEK8 284086    | B2 |
| NELF 26012     | B2 |
| NELL1 4745     | B2 |
| NELL2 4753     | B2 |
| NENF 29937     | B2 |
| NEO1 4756      | B2 |
| NET1 10276     | B2 |
| NETO1 81832    | B2 |
| NETO2 81831    | B2 |
| NEU3 10825     | B2 |
| NEU4 129807    | B2 |
| NEURL1B 54492  | B2 |
| NEURL3 93082   | B2 |
| NEURL 9148     | B2 |
| NEUROD1 4760   | B2 |
| NEUROD2 4761   | B2 |
| NEUROD4 58158  | B2 |
| NEUROG3 50674  | B2 |
| NEXN 91624     | B2 |
| NF1 4763       | B2 |
| NF2 4771       | B2 |
| NFAM1 150372   | B2 |
| NFASC 23114    | B2 |
| NFATC1 4772    | B2 |
| NFATC2IP 84901 | B2 |
| NFATC4 4776    | B2 |
| NFE2L1 4779    | B2 |
| NFE2L3 9603    | B2 |
| NFE2 4778      | B2 |
| NFIA 4774      | B2 |
| NFIC 4782      | B2 |
| NFKB1 4790     | B2 |
| NFKB2 4791     | B2 |
| NFKBIA 4792    | B2 |
| NFKBIB 4793    | B2 |
| NFKBID 84807   | B2 |
| NFKBIL1 4795   | B2 |
| NFKBIZ 64332   | B2 |
| NFS1 9054      | B2 |
| NFX1 4799      | B2 |
| NFXL1 152518   | B2 |
| NFYB 4801      | B2 |
| NFYC 4802      | B2 |
| NGB 58157      | B2 |
| NGDN 25983     | B2 |
| NGEF 25791     | B2 |
| NGFRAP1 27018  | B2 |
| NGLY1 55768    | B2 |

|                 |    |
|-----------------|----|
| NGRN 51335      | B2 |
| NHEDC1 150159   | B2 |
| NHEDC2 133308   | B2 |
| NHEG1 100294720 | B2 |
| NHLH1 4807      | B2 |
| NHLH2 4808      | B2 |
| NHLRC1 378884   | B2 |
| NHLRC2 374354   | B2 |
| NHLRC4 283948   | B2 |
| NHP2L1 4809     | B2 |
| NHSL1 57224     | B2 |
| NHSL2 340527    | B2 |
| NHS 4810        | B2 |
| NID1 4811       | B2 |
| NID2 22795      | B2 |
| NIF3L1 60491    | B2 |
| NINJ2 4815      | B2 |
| NINL 22981      | B2 |
| NIN 51199       | B2 |
| NIP7 51388      | B2 |
| NIPAL1 152519   | B2 |
| NIPAL2 79815    | B2 |
| NIPAL3 57185    | B2 |
| NIPAL4 348938   | B2 |
| NIPBL 25836     | B2 |
| NIPSNAP3A 25934 | B2 |
| NIT1 4817       | B2 |
| NKAIN3 286183   | B2 |
| NKAIN4 128414   | B2 |
| NKD1 85407      | B2 |
| NKG7 4818       | B2 |
| NKIRAS1 28512   | B2 |
| NKIRAS2 28511   | B2 |
| NKRF 55922      | B2 |
| NKX1-2 390010   | B2 |
| NKX2-1 7080     | B2 |
| NKX2-2 4821     | B2 |
| NKX2-3 159296   | B2 |
| NKX2-5 1482     | B2 |
| NKX2-6 137814   | B2 |
| NKX2-8 26257    | B2 |
| NKX3-1 4824     | B2 |
| NKX6-1 4825     | B2 |
| NKX6-3 157848   | B2 |
| NLE1 54475      | B2 |
| NLGN2 57555     | B2 |
| NLGN4Y 22829    | B2 |
| NLRC3 197358    | B2 |
| NLRC4 58484     | B2 |
| NLRC5 84166     | B2 |
| NLRP10 338322   | B2 |

|                  |    |
|------------------|----|
| NLRP11 204801    | B2 |
| NLRP12 91662     | B2 |
| NLRP13 126204    | B2 |
| NLRP14 338323    | B2 |
| NLRP2 55655      | B2 |
| NLRP3 114548     | B2 |
| NLRP4 147945     | B2 |
| NLRP5 126206     | B2 |
| NLRP6 171389     | B2 |
| NLRP7 199713     | B2 |
| NLRP8 126205     | B2 |
| NLRP9 338321     | B2 |
| NMD3 51068       | B2 |
| NME1-NME2 654364 | B2 |
| NME2P1 283458    | B2 |
| NME2 4831        | B2 |
| NME5 8382        | B2 |
| NMI 9111         | B2 |
| NMNAT1 64802     | B2 |
| NMUR2 56923      | B2 |
| NMU 10874        | B2 |
| NNAT 4826        | B2 |
| NNT 23530        | B2 |
| NOC3L 64318      | B2 |
| NOD2 64127       | B2 |
| NOG 9241         | B2 |
| NOL11 25926      | B2 |
| NOL12 79159      | B2 |
| NOL3 8996        | B2 |
| NOL4 8715        | B2 |
| NOL6 65083       | B2 |
| NOL7 51406       | B2 |
| NOL8 55035       | B2 |
| NOL9 79707       | B2 |
| NOM1 64434       | B2 |
| NOP10 55505      | B2 |
| NOP14 8602       | B2 |
| NOS1AP 9722      | B2 |
| NOS1 4842        | B2 |
| NOS2 4843        | B2 |
| NOS3 4846        | B2 |
| NOSIP 51070      | B2 |
| NOSTRIN 115677   | B2 |
| NOTCH1 4851      | B2 |
| NOTCH2NL 388677  | B2 |
| NOTCH2 4853      | B2 |
| NOTCH3 4854      | B2 |
| NOTO 344022      | B2 |
| NOTUM 147111     | B2 |
| NOVA1 4857       | B2 |
| NOX1 27035       | B2 |

|              |    |
|--------------|----|
| NOX4 50507   | B2 |
| NOX5 79400   | B2 |
| NOXA1 10811  | B2 |
| NOXO1 124056 | B2 |
| NPAS1 4861   | B2 |
| NPAS2 4862   | B2 |
| NPAT 4863    | B2 |
| NPBWR1 2831  | B2 |
| NPB 256933   | B2 |
| NPC1L1 29881 | B2 |
| NPC1 4864    | B2 |
| NPC2 10577   | B2 |
| NPDC1 56654  | B2 |
| NPEPL1 79716 | B2 |
| NPEPPS 9520  | B2 |
| NPFFR1 64106 | B2 |
| NPFFR2 10886 | B2 |
| NPHP1 4867   | B2 |
| NPHP4 261734 | B2 |
| NPHS1 4868   | B2 |
| NPHS2 7827   | B2 |
| NPIPL3 23117 | B2 |
| NPLOC4 55666 | B2 |
| NPL 80896    | B2 |
| NPM1 4869    | B2 |
| NPM3 10360   | B2 |
| NPPA 4878    | B2 |
| NPPB 4879    | B2 |
| NPPC 4880    | B2 |
| NPR3 4883    | B2 |
| NPRL3 8131   | B2 |
| NPTN 27020   | B2 |
| NPTX1 4884   | B2 |
| NPTX2 4885   | B2 |
| NPTXR 23467  | B2 |
| NPW 283869   | B2 |
| NPY1R 4886   | B2 |
| NPY5R 4889   | B2 |
| NPY6R 4888   | B2 |
| NPY 4852     | B2 |
| NQO1 1728    | B2 |
| NQO2 4835    | B2 |
| NR0B1 190    | B2 |
| NR0B2 8431   | B2 |
| NR1D1 9572   | B2 |
| NR1H2 7376   | B2 |
| NR1H4 9971   | B2 |
| NR1I2 8856   | B2 |
| NR1I3 9970   | B2 |
| NR2E1 7101   | B2 |
| NR2E3 10002  | B2 |

|                  |    |
|------------------|----|
| NR2F1 7025       | B2 |
| NR2F2 7026       | B2 |
| NR4A2 4929       | B2 |
| NR5A1 2516       | B2 |
| NR6A1 2649       | B2 |
| NRADDP 100129354 | B2 |
| NRAP 4892        | B2 |
| NRARP 441478     | B2 |
| NRBF2 29982      | B2 |
| NRCAM 4897       | B2 |
| NRD1 4898        | B2 |
| NRG3 10718       | B2 |
| NRG4 145957      | B2 |
| NRGN 4900        | B2 |
| NRIP1 8204       | B2 |
| NRIP3 56675      | B2 |
| NRK 203447       | B2 |
| NRL 4901         | B2 |
| NRP2 8828        | B2 |
| NRSN1 140767     | B2 |
| NRTN 4902        | B2 |
| NRXN1 9378       | B2 |
| NRXN2 9379       | B2 |
| NRXN3 9369       | B2 |
| NSA2 10412       | B2 |
| NSD1 64324       | B2 |
| NSFL1C 55968     | B2 |
| NSMAF 8439       | B2 |
| NSMCE4A 54780    | B2 |
| NSUN2 54888      | B2 |
| NSUN3 63899      | B2 |
| NSUN4 387338     | B2 |
| NSUN5P1 155400   | B2 |
| NSUN5P2 260294   | B2 |
| NSUN6 221078     | B2 |
| NSUN7 79730      | B2 |
| NT5C1A 84618     | B2 |
| NT5C1B 93034     | B2 |
| NT5C2 22978      | B2 |
| NT5C3L 115024    | B2 |
| NT5C 30833       | B2 |
| NT5DC1 221294    | B2 |
| NT5DC2 64943     | B2 |
| NT5M 56953       | B2 |
| NTAN1 123803     | B2 |
| NTM 50863        | B2 |
| NTN1 9423        | B2 |
| NTN3 4917        | B2 |
| NTN4 59277       | B2 |
| NTNG1 22854      | B2 |
| NTRK1 4914       | B2 |

|                 |    |
|-----------------|----|
| NTSR1 4923      | B2 |
| NTSR2 23620     | B2 |
| NTS 4922        | B2 |
| NUAK1 9891      | B2 |
| NUB1 51667      | B2 |
| NUBPL 80224     | B2 |
| NUCB1 4924      | B2 |
| NUCKS1 64710    | B2 |
| NUDCD1 84955    | B2 |
| NUDCD2 134492   | B2 |
| NUDCD3 23386    | B2 |
| NUDC 10726      | B2 |
| NUDT10 170685   | B2 |
| NUDT12 83594    | B2 |
| NUDT14 256281   | B2 |
| NUDT15 55270    | B2 |
| NUDT16P1 152195 | B2 |
| NUDT17 200035   | B2 |
| NUDT18 79873    | B2 |
| NUDT21 11051    | B2 |
| NUDT2 318       | B2 |
| NUDT4 11163     | B2 |
| NUDT6 11162     | B2 |
| NUDT8 254552    | B2 |
| NUDT9 53343     | B2 |
| NUFIP1 26747    | B2 |
| NUFIP2 57532    | B2 |
| NUMA1 4926      | B2 |
| NUMBL 9253      | B2 |
| NUMB 8650       | B2 |
| NUP153 9972     | B2 |
| NUP160 23279    | B2 |
| NUP188 23511    | B2 |
| NUP210L 91181   | B2 |
| NUP214 8021     | B2 |
| NUP35 129401    | B2 |
| NUP43 348995    | B2 |
| NUP50 10762     | B2 |
| NUP54 53371     | B2 |
| NUP62CL 54830   | B2 |
| NUP88 4927      | B2 |
| NUP93 9688      | B2 |
| NUP98 4928      | B2 |
| NUPL2 11097     | B2 |
| NUPR1 26471     | B2 |
| NUS1 116150     | B2 |
| NWD1 284434     | B2 |
| NXF1 10482      | B2 |
| NXF2 56001      | B2 |
| NXF3 56000      | B2 |
| NXF4 55999      | B2 |

|               |    |
|---------------|----|
| NXF5 55998    | B2 |
| NXNL2 158046  | B2 |
| NXN 64359     | B2 |
| NXPH1 30010   | B2 |
| NXPH2 11249   | B2 |
| NXPH3 11248   | B2 |
| NXPH4 11247   | B2 |
| NXT1 29107    | B2 |
| NXT2 55916    | B2 |
| NYX 60506     | B2 |
| OASL 8638     | B2 |
| OAT 4942      | B2 |
| OAZ1 4946     | B2 |
| OAZ2 4947     | B2 |
| OBFC2A 64859  | B2 |
| OBP2A 29991   | B2 |
| OBP2B 29989   | B2 |
| OBSCN 84033   | B2 |
| OBSL1 23363   | B2 |
| OC90 729330   | B2 |
| OCEL1 79629   | B2 |
| OCIAD1 54940  | B2 |
| OCLM 10896    | B2 |
| OCM 654231    | B2 |
| OCRL 4952     | B2 |
| ODAM 54959    | B2 |
| ODC1 4953     | B2 |
| ODF1 4956     | B2 |
| ODF2L 57489   | B2 |
| ODF3B 440836  | B2 |
| ODF3L2 284451 | B2 |
| ODF3 113746   | B2 |
| ODF4 146852   | B2 |
| ODZ3 55714    | B2 |
| ODZ4 26011    | B2 |
| OFD1 8481     | B2 |
| OGDHL 55753   | B2 |
| OGDH 4967     | B2 |
| OGFOD1 55239  | B2 |
| OGFOD2 79676  | B2 |
| OGFRL1 79627  | B2 |
| OGFR 11054    | B2 |
| OGG1 4968     | B2 |
| OIT3 170392   | B2 |
| OLAH 55301    | B2 |
| OLFM1 10439   | B2 |
| OLFM2 93145   | B2 |
| OLFM3 118427  | B2 |
| OLFM4 10562   | B2 |
| OLFML3 56944  | B2 |
| OLIG1 116448  | B2 |

|                |    |
|----------------|----|
| OLIG2 10215    | B2 |
| OLIG3 167826   | B2 |
| OMA1 115209    | B2 |
| OMD 4958       | B2 |
| OMG 4974       | B2 |
| OMP 4975       | B2 |
| ONECUT1 3175   | B2 |
| ONECUT2 9480   | B2 |
| OOEP 441161    | B2 |
| OPA1 4976      | B2 |
| OPA3 80207     | B2 |
| OPALIN 93377   | B2 |
| OPCML 4978     | B2 |
| OPHN1 4983     | B2 |
| OPLAH 26873    | B2 |
| OPN1LW 5956    | B2 |
| OPN1MW 2652    | B2 |
| OPN1SW 611     | B2 |
| OPN3 23596     | B2 |
| OPN4 94233     | B2 |
| OPN5 221391    | B2 |
| OPRD1 4985     | B2 |
| OPRK1 4986     | B2 |
| OPRL1 4987     | B2 |
| OPRM1 4988     | B2 |
| OPTC 26254     | B2 |
| OR10A2 341276  | B2 |
| OR10A4 283297  | B2 |
| OR10AD1 121275 | B2 |
| OR10G2 26534   | B2 |
| OR10G4 390264  | B2 |
| OR10H1 26539   | B2 |
| OR10H2 26538   | B2 |
| OR10H4 126541  | B2 |
| OR10H5 284433  | B2 |
| OR10J3 441911  | B2 |
| OR10Q1 219960  | B2 |
| OR10R2 343406  | B2 |
| OR10W1 81341   | B2 |
| OR11A1 26531   | B2 |
| OR11G2 390439  | B2 |
| OR11H12 440153 | B2 |
| OR11H4 390442  | B2 |
| OR11H6 122748  | B2 |
| OR11L1 391189  | B2 |
| OR12D2 26529   | B2 |
| OR12D3 81797   | B2 |
| OR13A1 79290   | B2 |
| OR13C2 392376  | B2 |
| OR13C5 138799  | B2 |
| OR13D1 286365  | B2 |



|                |    |
|----------------|----|
| OR13F1 138805  | B2 |
| OR13G1 441933  | B2 |
| OR13H1 347468  | B2 |
| OR13J1 392309  | B2 |
| OR14A16 284532 | B2 |
| OR14C36 127066 | B2 |
| OR14I1 401994  | B2 |
| OR1B1 347169   | B2 |
| OR1C1 26188    | B2 |
| OR1D4 8385     | B2 |
| OR1E1 8387     | B2 |
| OR1E2 8388     | B2 |
| OR1F1 4992     | B2 |
| OR1F2P 26184   | B2 |
| OR1G1 8390     | B2 |
| OR1J1 347168   | B2 |
| OR1J2 26740    | B2 |
| OR1J4 26219    | B2 |
| OR1K1 392392   | B2 |
| OR1L1 26737    | B2 |
| OR1L3 26735    | B2 |
| OR1L4 254973   | B2 |
| OR1L6 392390   | B2 |
| OR1L8 138881   | B2 |
| OR1M1 125963   | B2 |
| OR1N1 138883   | B2 |
| OR1N2 138882   | B2 |
| OR1Q1 158131   | B2 |
| OR2A12 346525  | B2 |
| OR2A14 135941  | B2 |
| OR2A25 392138  | B2 |
| OR2A2 442361   | B2 |
| OR2A4 79541    | B2 |
| OR2A5 393046   | B2 |
| OR2A7 401427   | B2 |
| OR2AE1 81392   | B2 |
| OR2AG1 144125  | B2 |
| OR2AG2 338755  | B2 |
| OR2AK2 391191  | B2 |
| OR2AT4 341152  | B2 |
| OR2B11 127623  | B2 |
| OR2B2 81697    | B2 |
| OR2C1 4993     | B2 |
| OR2C3 81472    | B2 |
| OR2D2 120776   | B2 |
| OR2F1 26211    | B2 |
| OR2F2 135948   | B2 |
| OR2H1 26716    | B2 |
| OR2H2 7932     | B2 |
| OR2J2 26707    | B2 |
| OR2J3 442186   | B2 |

|               |    |
|---------------|----|
| OR2K2 26248   | B2 |
| OR2L1P 26247  | B2 |
| OR2L2 26246   | B2 |
| OR2L8 391190  | B2 |
| OR2M3 127062  | B2 |
| OR2M4 26245   | B2 |
| OR2S2 56656   | B2 |
| OR2T33 391195 | B2 |
| OR2T3 343173  | B2 |
| OR2T4 127074  | B2 |
| OR2T6 254879  | B2 |
| OR2T8 343172  | B2 |
| OR2V2 285659  | B2 |
| OR2W3 343171  | B2 |
| OR2W5 441932  | B2 |
| OR3A1 4994    | B2 |
| OR3A2 4995    | B2 |
| OR3A3 8392    | B2 |
| OR3A4 390756  | B2 |
| OR4C11 219429 | B2 |
| OR4C3 256144  | B2 |
| OR4C45 403257 | B2 |
| OR4C6 219432  | B2 |
| OR4D10 390197 | B2 |
| OR4D1 26689   | B2 |
| OR4D2 124538  | B2 |
| OR4D6 219983  | B2 |
| OR4E2 26686   | B2 |
| OR4F15 390649 | B2 |
| OR4F21 441308 | B2 |
| OR4F29 729759 | B2 |
| OR4F5 79501   | B2 |
| OR4F6 390648  | B2 |
| OR4K15 81127  | B2 |
| OR4K1 79544   | B2 |
| OR4M1 441670  | B2 |
| OR4M2 390538  | B2 |
| OR4N2 390429  | B2 |
| OR4N3P 390539 | B2 |
| OR4N4 283694  | B2 |
| OR51B2 79345  | B2 |
| OR51B4 79339  | B2 |
| OR51B5 282763 | B2 |
| OR51B6 390058 | B2 |
| OR51E1 143503 | B2 |
| OR51E2 81285  | B2 |
| OR51I1 390063 | B2 |
| OR51I2 390064 | B2 |
| OR51M1 390059 | B2 |
| OR51Q1 390061 | B2 |
| OR52B2 255725 | B2 |

|                 |    |
|-----------------|----|
| OR52B4 143496   | B2 |
| OR52B6 340980   | B2 |
| OR52D1 390066   | B2 |
| OR52E4 390081   | B2 |
| OR52E6 390078   | B2 |
| OR52E8 390079   | B2 |
| OR52H1 390067   | B2 |
| OR52I1 390037   | B2 |
| OR52I2 143502   | B2 |
| OR52K1 390036   | B2 |
| OR52K2 119774   | B2 |
| OR52L1 338751   | B2 |
| OR52M1 119772   | B2 |
| OR52N1 79473    | B2 |
| OR52N2 390077   | B2 |
| OR52N5 390075   | B2 |
| OR52W1 120787   | B2 |
| OR56A3 390083   | B2 |
| OR56A4 120793   | B2 |
| OR56A5 390084   | B2 |
| OR56B1 387748   | B2 |
| OR56B4 196335   | B2 |
| OR5AK2 390181   | B2 |
| OR5AN1 390195   | B2 |
| OR5AU1 390445   | B2 |
| OR5B12 390191   | B2 |
| OR5B21 219968   | B2 |
| OR5B2 390190    | B2 |
| OR5C1 392391    | B2 |
| OR5E1P 26343    | B2 |
| OR5H2 79310     | B2 |
| OR5M11 219487   | B2 |
| OR5M8 219484    | B2 |
| OR5P2 120065    | B2 |
| OR5P3 120066    | B2 |
| OR6A2 8590      | B2 |
| OR6B1 135946    | B2 |
| OR6B2 389090    | B2 |
| OR6B3 150681    | B2 |
| OR6C2 341416    | B2 |
| OR6C70 390327   | B2 |
| OR6F1 343169    | B2 |
| OR6K3 391114    | B2 |
| OR6T1 219874    | B2 |
| OR6V1 346517    | B2 |
| OR6W1P 89883    | B2 |
| OR7A5 26659     | B2 |
| OR7C1 26664     | B2 |
| OR7D2 162998    | B2 |
| OR7D4 125958    | B2 |
| OR7E156P 283491 | B2 |

|                 |    |
|-----------------|----|
| OR7E24 26648    | B2 |
| OR7E37P 26636   | B2 |
| OR7E5P 219445   | B2 |
| OR7E91P 79315   | B2 |
| OR8A1 390275    | B2 |
| OR8B12 219858   | B2 |
| OR8B3 390271    | B2 |
| OR8D1 283159    | B2 |
| OR8D4 338662    | B2 |
| OR8G5 219865    | B2 |
| OR8S1 341568    | B2 |
| OR9A2 135924    | B2 |
| OR9A4 130075    | B2 |
| OR9Q1 219956    | B2 |
| ORAI1 84876     | B2 |
| ORAI3 93129     | B2 |
| ORAOV1 220064   | B2 |
| ORC2L 4999      | B2 |
| ORC3L 23595     | B2 |
| ORC4L 5000      | B2 |
| ORM1 5004       | B2 |
| ORM2 5005       | B2 |
| ORMDL1 94101    | B2 |
| ORMDL3 94103    | B2 |
| OS9 10956       | B2 |
| OSBP2 23762     | B2 |
| OSBPL10 114884  | B2 |
| OSBPL11 114885  | B2 |
| OSBPL2 9885     | B2 |
| OSBPL3 26031    | B2 |
| OSBPL5 114879   | B2 |
| OSBPL6 114880   | B2 |
| OSBPL7 114881   | B2 |
| OSBPL8 114882   | B2 |
| OSBP 5007       | B2 |
| OSCAR 126014    | B2 |
| OSCP1 127700    | B2 |
| OSGEPL1 64172   | B2 |
| OSGEP 55644     | B2 |
| OSGIN1 29948    | B2 |
| OSGIN2 734      | B2 |
| OSMR 9180       | B2 |
| OSM 5008        | B2 |
| OSR2 116039     | B2 |
| OSTBETA 123264  | B2 |
| OSTCL 202459    | B2 |
| OSTF1 26578     | B2 |
| OSTM1 28962     | B2 |
| OSTN 344901     | B2 |
| OSTalpha 200931 | B2 |
| OTC 5009        | B2 |

|                  |    |
|------------------|----|
| OTOA 146183      | B2 |
| OTOF 9381        | B2 |
| OTOL1 131149     | B2 |
| OTOP1 133060     | B2 |
| OTOP2 92736      | B2 |
| OTOP3 347741     | B2 |
| OTOR 56914       | B2 |
| OTOS 150677      | B2 |
| OTP 23440        | B2 |
| OTUD1 220213     | B2 |
| OTUD4 54726      | B2 |
| OTUD5 55593      | B2 |
| OTUD6A 139562    | B2 |
| OTUD6B 51633     | B2 |
| OTX1 5013        | B2 |
| OTX2 5015        | B2 |
| OVCH1 341350     | B2 |
| OVGP1 5016       | B2 |
| OXA1L 5018       | B2 |
| OXCT2 64064      | B2 |
| OXER1 165140     | B2 |
| OXNAD1 92106     | B2 |
| OXR1 55074       | B2 |
| OXSR1 9943       | B2 |
| OXT 5020         | B2 |
| P2RX1 5023       | B2 |
| P2RX2 22953      | B2 |
| P2RX3 5024       | B2 |
| P2RX5 5026       | B2 |
| P2RX6 9127       | B2 |
| P2RX7 5027       | B2 |
| P2RY10 27334     | B2 |
| P2RY11 5032      | B2 |
| P2RY1 5028       | B2 |
| P2RY2 5029       | B2 |
| P2RY4 5030       | B2 |
| P2RY6 5031       | B2 |
| P2RY8 286530     | B2 |
| P4HA1 5033       | B2 |
| P704P 641455     | B2 |
| PA2G4 5036       | B2 |
| PAAF1 80227      | B2 |
| PABPC1L2A 340529 | B2 |
| PABPC1L2B 645974 | B2 |
| PABPC1L 80336    | B2 |
| PABPC1P2 728773  | B2 |
| PABPC1 26986     | B2 |
| PABPC3 5042      | B2 |
| PABPC4 8761      | B2 |
| PABPN1L 390748   | B2 |
| PABPN1 8106      | B2 |

|               |    |
|---------------|----|
| PACS1 55690   | B2 |
| PACS2 23241   | B2 |
| PACSIN2 11252 | B2 |
| PACSIN3 29763 | B2 |
| PADI1 29943   | B2 |
| PADI2 11240   | B2 |
| PADI3 51702   | B2 |
| PADI4 23569   | B2 |
| PADI6 353238  | B2 |
| PAEP 5047     | B2 |
| PAF1 54623    | B2 |
| PAFAH1B2 5049 | B2 |
| PAG1 55824    | B2 |
| PAGE2B 389860 | B2 |
| PAGE2 203569  | B2 |
| PAGE4 9506    | B2 |
| PAGE5 90737   | B2 |
| PAH 5053      | B2 |
| PAIP2B 400961 | B2 |
| PAIP2 51247   | B2 |
| PAK1IP1 55003 | B2 |
| PAK1 5058     | B2 |
| PAK6 56924    | B2 |
| PALLD 23022   | B2 |
| PALM2 114299  | B2 |
| PALM3 342979  | B2 |
| PAM 5066      | B2 |
| PAN3 255967   | B2 |
| PANK1 53354   | B2 |
| PANK2 80025   | B2 |
| PANK4 55229   | B2 |
| PANX2 56666   | B2 |
| PANX3 116337  | B2 |
| PAOX 196743   | B2 |
| PAPD4 167153  | B2 |
| PAPD5 64282   | B2 |
| PAPD7 11044   | B2 |
| PAPL 390928   | B2 |
| PAPOLG 64895  | B2 |
| PAPPA 5069    | B2 |
| PAPSS1 9061   | B2 |
| PAPSS2 9060   | B2 |
| PAQR3 152559  | B2 |
| PAQR5 54852   | B2 |
| PAQR6 79957   | B2 |
| PAQR7 164091  | B2 |
| PAQR8 85315   | B2 |
| PAQR9 344838  | B2 |
| PAR4 347745   | B2 |
| PARD3 56288   | B2 |
| PARD6A 50855  | B2 |

|                 |    |
|-----------------|----|
| PARD6G 84552    | B2 |
| PARG 8505       | B2 |
| PARK7 11315     | B2 |
| PARL 55486      | B2 |
| PARM1 25849     | B2 |
| PARP10 84875    | B2 |
| PARP11 57097    | B2 |
| PARP15 165631   | B2 |
| PARP16 54956    | B2 |
| PARP2 10038     | B2 |
| PARP4 143       | B2 |
| PARP6 56965     | B2 |
| PARP8 79668     | B2 |
| PARS2 25973     | B2 |
| PART1 25859     | B2 |
| PARVB 29780     | B2 |
| PARVG 64098     | B2 |
| PASD1 139135    | B2 |
| PATE1 160065    | B2 |
| PATE2 399967    | B2 |
| PATE3 100169851 | B2 |
| PATE4 399968    | B2 |
| PATL1 219988    | B2 |
| PATL2 197135    | B2 |
| PAWR 5074       | B2 |
| PAX1 5075       | B2 |
| PAX3 5077       | B2 |
| PAX5 5079       | B2 |
| PAX6 5080       | B2 |
| PAX7 5081       | B2 |
| PAX8 7849       | B2 |
| PBLD 64081      | B2 |
| PBOV1 59351     | B2 |
| PBRM1 55193     | B2 |
| PBX2 5089       | B2 |
| PBX3 5090       | B2 |
| PBX4 80714      | B2 |
| PBXIP1 57326    | B2 |
| PCA3 50652      | B2 |
| PCBD1 5092      | B2 |
| PCBD2 84105     | B2 |
| PCBP1 5093      | B2 |
| PCBP2 5094      | B2 |
| PCBP4 57060     | B2 |
| PCCB 5096       | B2 |
| PCDH10 57575    | B2 |
| PCDH11X 27328   | B2 |
| PCDH11Y 83259   | B2 |
| PCDH12 51294    | B2 |
| PCDH15 65217    | B2 |
| PCDH1 5097      | B2 |

|                |    |
|----------------|----|
| PCDH20 64881   | B2 |
| PCDH7 5099     | B2 |
| PCDH8 5100     | B2 |
| PCDHA10 56139  | B2 |
| PCDHA11 56138  | B2 |
| PCDHA12 56137  | B2 |
| PCDHA13 56136  | B2 |
| PCDHA1 56147   | B2 |
| PCDHA2 56146   | B2 |
| PCDHA3 56145   | B2 |
| PCDHA4 56144   | B2 |
| PCDHA5 56143   | B2 |
| PCDHA6 56142   | B2 |
| PCDHA7 56141   | B2 |
| PCDHA8 56140   | B2 |
| PCDHA9 9752    | B2 |
| PCDHAC1 56135  | B2 |
| PCDHAC2 56134  | B2 |
| PCDHB10 56126  | B2 |
| PCDHB11 56125  | B2 |
| PCDHB13 56123  | B2 |
| PCDHB14 56122  | B2 |
| PCDHB16 57717  | B2 |
| PCDHB17 54661  | B2 |
| PCDHB1 29930   | B2 |
| PCDHB2 56133   | B2 |
| PCDHB3 56132   | B2 |
| PCDHB5 26167   | B2 |
| PCDHB6 56130   | B2 |
| PCDHB8 56128   | B2 |
| PCDHB9 56127   | B2 |
| PCDHGA10 56106 | B2 |
| PCDHGA12 26025 | B2 |
| PCDHGA1 56114  | B2 |
| PCDHGA4 56111  | B2 |
| PCDHGA5 56110  | B2 |
| PCDHGA7 56108  | B2 |
| PCDHGA8 9708   | B2 |
| PCDHGB1 56104  | B2 |
| PCDHGB2 56103  | B2 |
| PCDHGB3 56102  | B2 |
| PCDHGB4 8641   | B2 |
| PCDHGB5 56101  | B2 |
| PCDHGB8P 56120 | B2 |
| PCDHGC4 56098  | B2 |
| PCDHGC5 56097  | B2 |
| PCDP1 200373   | B2 |
| PCF11 51585    | B2 |
| PCGEM1 64002   | B2 |
| PCGF1 84759    | B2 |
| PCGF2 7703     | B2 |



|                |    |
|----------------|----|
| PCGF3 10336    | B2 |
| PCGF6 84108    | B2 |
| PCID2 55795    | B2 |
| PCIF1 63935    | B2 |
| PCK2 5106      | B2 |
| PCLO 27445     | B2 |
| PCM1 5108      | B2 |
| PCMT1 5110     | B2 |
| PCMTD1 115294  | B2 |
| PCMTD2 55251   | B2 |
| PCNAP1 359806  | B2 |
| PCNP 57092     | B2 |
| PCNT 5116      | B2 |
| PCNXL2 80003   | B2 |
| PCOLCE 5118    | B2 |
| PCOTH 542767   | B2 |
| PCP2 126006    | B2 |
| PCP4L1 654790  | B2 |
| PCP4 5121      | B2 |
| PCSK1N 27344   | B2 |
| PCSK1 5122     | B2 |
| PCSK2 5126     | B2 |
| PCSK4 54760    | B2 |
| PCSK6 5046     | B2 |
| PCSK7 9159     | B2 |
| PCSK9 255738   | B2 |
| PCTP 58488     | B2 |
| PCYT1A 5130    | B2 |
| PCYT2 5833     | B2 |
| PDAP1 11333    | B2 |
| PDCD1 22984    | B2 |
| PDCD1LG2 80380 | B2 |
| PDCD1 5133     | B2 |
| PDCD2L 84306   | B2 |
| PDCD2 5134     | B2 |
| PDCD4 27250    | B2 |
| PDCD5 9141     | B2 |
| PDCD6IP 10015  | B2 |
| PDCD7 10081    | B2 |
| PDCL 5082      | B2 |
| PDC 5132       | B2 |
| PDDC1 347862   | B2 |
| PDE10A 10846   | B2 |
| PDE12 201626   | B2 |
| PDE3A 5139     | B2 |
| PDE4A 5141     | B2 |
| PDE4B 5142     | B2 |
| PDE4C 5143     | B2 |
| PDE4DIP 9659   | B2 |
| PDE4D 5144     | B2 |
| PDE6A 5145     | B2 |

|                  |    |
|------------------|----|
| PDE6B 5158       | B2 |
| PDE6C 5146       | B2 |
| PDE6G 5148       | B2 |
| PDE6H 5149       | B2 |
| PDE7A 5150       | B2 |
| PDE9A 5152       | B2 |
| PDGFB 5155       | B2 |
| PDGFC 56034      | B2 |
| PDGFRB 5159      | B2 |
| PDHA1 5160       | B2 |
| PDHA2 5161       | B2 |
| PDHB 5162        | B2 |
| PDHX 8050        | B2 |
| PDIA2 64714      | B2 |
| PDILT 204474     | B2 |
| PDK1 5163        | B2 |
| PDLIM2 64236     | B2 |
| PDLIM3 27295     | B2 |
| PDLIM5 10611     | B2 |
| PDLIM7 9260      | B2 |
| PDP1 54704       | B2 |
| PDPK1 5170       | B2 |
| PDPN 10630       | B2 |
| PDS5A 23244      | B2 |
| PDS5B 23047      | B2 |
| PDSS2 57107      | B2 |
| PDX1 3651        | B2 |
| PDXDC2 283970    | B2 |
| PDXK 8566        | B2 |
| PDYN 5173        | B2 |
| PDZD3 79849      | B2 |
| PDZD7 79955      | B2 |
| PDZD8 118987     | B2 |
| PDZD9 255762     | B2 |
| PDZK1IP1 10158   | B2 |
| PDZK1P1 728939   | B2 |
| PDZK1 5174       | B2 |
| PDZRN4 29951     | B2 |
| PEA15 8682       | B2 |
| PEBP1 5037       | B2 |
| PEBP4 157310     | B2 |
| PECI 10455       | B2 |
| PECR 55825       | B2 |
| PEF1 553115      | B2 |
| PEG10 23089      | B2 |
| PEG3AS 100169890 | B2 |
| PEG3 5178        | B2 |
| PELI3 246330     | B2 |
| PELO 53918       | B2 |
| PELP1 27043      | B2 |
| PENK 5179        | B2 |

|                |    |
|----------------|----|
| PEPD 5184      | B2 |
| PER4 168741    | B2 |
| PERP 64065     | B2 |
| PES1 23481     | B2 |
| PET112L 5188   | B2 |
| PEX10 5192     | B2 |
| PEX11A 8800    | B2 |
| PEX11G 92960   | B2 |
| PEX12 5193     | B2 |
| PEX14 5195     | B2 |
| PEX16 9409     | B2 |
| PEX19 5824     | B2 |
| PEX1 5189      | B2 |
| PEX26 55670    | B2 |
| PEX2 5828      | B2 |
| PEX3 8504      | B2 |
| PEX5L 51555    | B2 |
| PEX6 5190      | B2 |
| PEX7 5191      | B2 |
| PF4V1 5197     | B2 |
| PF4 5196       | B2 |
| PFAS 5198      | B2 |
| PFDN1 5201     | B2 |
| PFDN4 5203     | B2 |
| PFKFB2 5208    | B2 |
| PFKL 5211      | B2 |
| PFKM 5213      | B2 |
| PFKP 5214      | B2 |
| PFN3 345456    | B2 |
| PFN4 375189    | B2 |
| PGA4 643847    | B2 |
| PGA5 5222      | B2 |
| PGAM2 5224     | B2 |
| PGAM4 441531   | B2 |
| PGAP2 27315    | B2 |
| PGAP3 93210    | B2 |
| PGBD1 84547    | B2 |
| PGBD2 267002   | B2 |
| PGBD3 267004   | B2 |
| PGBD5 79605    | B2 |
| PGC 5225       | B2 |
| PGD 5226       | B2 |
| PGF 5228       | B2 |
| PGK2 5232      | B2 |
| PGLS 25796     | B2 |
| PGLYRP1 8993   | B2 |
| PGLYRP2 114770 | B2 |
| PGLYRP3 114771 | B2 |
| PGLYRP4 57115  | B2 |
| PGM2L1 283209  | B2 |
| PGPEP1L 145814 | B2 |

|                 |    |
|-----------------|----|
| PGRMC1 10857    | B2 |
| PGRMC2 10424    | B2 |
| PGR 5241        | B2 |
| PGS1 9489       | B2 |
| PHACTR1 221692  | B2 |
| PHACTR3 116154  | B2 |
| PHACTR4 65979   | B2 |
| PHAX 51808      | B2 |
| PHB2 11331      | B2 |
| PHB 5245        | B2 |
| PHC1 1911       | B2 |
| PHC2 1912       | B2 |
| PHC3 80012      | B2 |
| PHEX 5251       | B2 |
| PHF11 51131     | B2 |
| PHF12 57649     | B2 |
| PHF13 148479    | B2 |
| PHF15 23338     | B2 |
| PHF19 26147     | B2 |
| PHF20L1 51105   | B2 |
| PHF20 51230     | B2 |
| PHF21B 112885   | B2 |
| PHF23 79142     | B2 |
| PHF5A 84844     | B2 |
| PHF8 23133      | B2 |
| PHGDH 26227     | B2 |
| PHGR1 644844    | B2 |
| PHIP 55023      | B2 |
| PHKA1 5255      | B2 |
| PHKB 5257       | B2 |
| PHKG1 5260      | B2 |
| PHLDA2 7262     | B2 |
| PHLPP2 23035    | B2 |
| PHOSPHO1 162466 | B2 |
| PHOSPHO2 493911 | B2 |
| PHOX2A 401      | B2 |
| PHOX2B 8929     | B2 |
| PHPT1 29085     | B2 |
| PHRF1 57661     | B2 |
| PHTF2 57157     | B2 |
| PHYH 5264       | B2 |
| PI3 5266        | B2 |
| PI4K2A 55361    | B2 |
| PI4K2B 55300    | B2 |
| PI4KA 5297      | B2 |
| PI4KB 5298      | B2 |
| PIAS1 8554      | B2 |
| PIAS2 9063      | B2 |
| PIBF1 10464     | B2 |
| PICK1 9463      | B2 |
| PIGA 5277       | B2 |

|                 |    |
|-----------------|----|
| PIGB 9488       | B2 |
| PIGF 5281       | B2 |
| PIGG 54872      | B2 |
| PIGH 5283       | B2 |
| PIGK 10026      | B2 |
| PIGN 23556      | B2 |
| PIGP 51227      | B2 |
| PIGR 5284       | B2 |
| PIGS 94005      | B2 |
| PIGT 51604      | B2 |
| PIGV 55650      | B2 |
| PIGY 84992      | B2 |
| PIH1D1 55011    | B2 |
| PIH1D2 120379   | B2 |
| PIK3AP1 118788  | B2 |
| PIK3C2A 5286    | B2 |
| PIK3C3 5289     | B2 |
| PIK3CB 5291     | B2 |
| PIK3CD 5293     | B2 |
| PIK3CG 5294     | B2 |
| PIK3R4 30849    | B2 |
| PIK3R5 23533    | B2 |
| PIK3R6 146850   | B2 |
| PILRA 29992     | B2 |
| PILRB 29990     | B2 |
| PIM1 5292       | B2 |
| PIM2 11040      | B2 |
| PIM3 415116     | B2 |
| PIN1L 5301      | B2 |
| PIN1 5300       | B2 |
| PIN4 5303       | B2 |
| PION 54103      | B2 |
| PIP4K2A 5305    | B2 |
| PIP4K2B 8396    | B2 |
| PIP5K1B 8395    | B2 |
| PIP5K1C 23396   | B2 |
| PIP5K1P1 206426 | B2 |
| PIP5KL1 138429  | B2 |
| PIPOX 51268     | B2 |
| PIP 5304        | B2 |
| PIRT 644139     | B2 |
| PIR 8544        | B2 |
| PITPNA 5306     | B2 |
| PITPNB 23760    | B2 |
| PITPNC1 26207   | B2 |
| PITPNM1 9600    | B2 |
| PITPNM3 83394   | B2 |
| PITRM1 10531    | B2 |
| PITX2 5308      | B2 |
| PITX3 5309      | B2 |
| PIWIL1 9271     | B2 |

|                |    |
|----------------|----|
| PIWIL2 55124   | B2 |
| PIWIL3 440822  | B2 |
| PKD1L1 168507  | B2 |
| PKD2L1 9033    | B2 |
| PKD2L2 27039   | B2 |
| PKHD1 5314     | B2 |
| PKIA 5569      | B2 |
| PKLR 5313      | B2 |
| PKN1 5585      | B2 |
| PKNOX1 5316    | B2 |
| PKNOX2 63876   | B2 |
| PKP1 5317      | B2 |
| PKP2 5318      | B2 |
| PKP4 8502      | B2 |
| PLA1A 51365    | B2 |
| PLA2G10 8399   | B2 |
| PLA2G12A 81579 | B2 |
| PLA2G12B 84647 | B2 |
| PLA2G15 23659  | B2 |
| PLA2G1B 5319   | B2 |
| PLA2G2A 5320   | B2 |
| PLA2G2C 391013 | B2 |
| PLA2G2D 26279  | B2 |
| PLA2G2F 64600  | B2 |
| PLA2G3 50487   | B2 |
| PLA2G4C 8605   | B2 |
| PLA2G4D 283748 | B2 |
| PLA2G4E 123745 | B2 |
| PLA2G7 7941    | B2 |
| PLAC4 191585   | B2 |
| PLAC8L1 153770 | B2 |
| PLAC8 51316    | B2 |
| PLAG1 5324     | B2 |
| PLAGL2 5326    | B2 |
| PLAT 5327      | B2 |
| PLBD1 79887    | B2 |
| PLBD2 196463   | B2 |
| PLCB1 23236    | B2 |
| PLCB2 5330     | B2 |
| PLCB4 5332     | B2 |
| PLCD4 84812    | B2 |
| PLCE1 51196    | B2 |
| PLCG1 5335     | B2 |
| PLCG2 5336     | B2 |
| PLCH1 23007    | B2 |
| PLCL1 5334     | B2 |
| PLCXD1 55344   | B2 |
| PLCXD2 257068  | B2 |
| PLD3 23646     | B2 |
| PLD4 122618    | B2 |
| PLD5 200150    | B2 |

|                 |    |
|-----------------|----|
| PLD6 201164     | B2 |
| PLDN 26258      | B2 |
| PLEC 5339       | B2 |
| PLEKHA1 59338   | B2 |
| PLEKHA2 59339   | B2 |
| PLEKHA3 65977   | B2 |
| PLEKHA5 54477   | B2 |
| PLEKHA6 22874   | B2 |
| PLEKHB1 58473   | B2 |
| PLEKHG2 64857   | B2 |
| PLEKHG3 26030   | B2 |
| PLEKHG4B 153478 | B2 |
| PLEKHG4 25894   | B2 |
| PLEKHG6 55200   | B2 |
| PLEKHG7 440107  | B2 |
| PLEKHH1 57475   | B2 |
| PLEKHH3 79990   | B2 |
| PLEKHJ1 55111   | B2 |
| PLEKHM2 23207   | B2 |
| PLEKHO1 51177   | B2 |
| PLEKHO2 80301   | B2 |
| PLEK 5341       | B2 |
| PLGLB2 5342     | B2 |
| PLG 5340        | B2 |
| PLIN5 440503    | B2 |
| PLK2 10769      | B2 |
| PLK5P 126520    | B2 |
| PLN 5350        | B2 |
| PLOD1 5351      | B2 |
| PLOD2 5352      | B2 |
| PLOD3 8985      | B2 |
| PLP2 5355       | B2 |
| PLRG1 5356      | B2 |
| PLSCR1 5359     | B2 |
| PLSCR2 57047    | B2 |
| PLSCR3 57048    | B2 |
| PLSCR5 389158   | B2 |
| PLUNC 51297     | B2 |
| PLVAP 83483     | B2 |
| PLXDC1 57125    | B2 |
| PLXDC2 84898    | B2 |
| PLXNA1 5361     | B2 |
| PLXNA2 5362     | B2 |
| PLXNB1 5364     | B2 |
| PLXNB2 23654    | B2 |
| PLXNB3 5365     | B2 |
| PLXND1 23129    | B2 |
| PMCHL1 5369     | B2 |
| PMCHL2 5370     | B2 |
| PMEPA1 56937    | B2 |
| PMFBP1 83449    | B2 |

|                 |    |
|-----------------|----|
| PML 5371        | B2 |
| PMM1 5372       | B2 |
| PMP2 5375       | B2 |
| PMPCA 23203     | B2 |
| PMPCB 9512      | B2 |
| PMS1 5378       | B2 |
| PMS2CL 441194   | B2 |
| PMS2L1 441263   | B2 |
| PMS2L2 5380     | B2 |
| PMS2L3 5387     | B2 |
| PMS2 5395       | B2 |
| PMVK 10654      | B2 |
| PNCK 139728     | B2 |
| PNLDC1 154197   | B2 |
| PNLIPRP1 5407   | B2 |
| PNLIPRP2 5408   | B2 |
| PNLIPRP3 119548 | B2 |
| PNLIP 5406      | B2 |
| PNMA1 9240      | B2 |
| PNMA2 10687     | B2 |
| PNMA3 29944     | B2 |
| PNMA5 114824    | B2 |
| PNMA6A 84968    | B2 |
| PNMAL1 55228    | B2 |
| PNMT 5409       | B2 |
| PNN 5411        | B2 |
| PNOC 5368       | B2 |
| PNPLA1 285848   | B2 |
| PNPLA3 80339    | B2 |
| PNPLA4 8228     | B2 |
| PNPLA5 150379   | B2 |
| PNPLA6 10908    | B2 |
| PNPLA8 50640    | B2 |
| PNPO 55163      | B2 |
| PNPT1 87178     | B2 |
| PNRC2 55629     | B2 |
| POC1B 282809    | B2 |
| POC5 134359     | B2 |
| PODNL1 79883    | B2 |
| PODXL 5420      | B2 |
| POF1B 79983     | B2 |
| POFUT1 23509    | B2 |
| POFUT2 23275    | B2 |
| POGZ 23126      | B2 |
| POLA1 5422      | B2 |
| POLB 5423       | B2 |
| POLD3 10714     | B2 |
| POLDIP2 26073   | B2 |
| POLDIP3 84271   | B2 |
| POLE4 56655     | B2 |
| POLG2 11232     | B2 |



|                   |    |
|-------------------|----|
| POLG 5428         | B2 |
| POLH 5429         | B2 |
| POLK 51426        | B2 |
| POLM 27434        | B2 |
| POLN 353497       | B2 |
| POLR1A 25885      | B2 |
| POLR1B 84172      | B2 |
| POLR1C 9533       | B2 |
| POLR1D 51082      | B2 |
| POLR2A 5430       | B2 |
| POLR2B 5431       | B2 |
| POLR2C 5432       | B2 |
| POLR2F 5435       | B2 |
| POLR2I 5438       | B2 |
| POLR2J2 246721    | B2 |
| POLR2J3 548644    | B2 |
| POLR2L 5441       | B2 |
| POLR3A 11128      | B2 |
| POLR3B 55703      | B2 |
| POLR3C 10623      | B2 |
| POLR3D 661        | B2 |
| POLR3E 55718      | B2 |
| POLR3F 10621      | B2 |
| POLR3G 10622      | B2 |
| POLR3H 171568     | B2 |
| POLRMT 5442       | B2 |
| POM121C 100101267 | B2 |
| POM121L10P 646074 | B2 |
| POM121L1P 25812   | B2 |
| POM121L2 94026    | B2 |
| POM121L4P 266697  | B2 |
| POM121L8P 29797   | B2 |
| POM121 9883       | B2 |
| POMC 5443         | B2 |
| POMGNT1 55624     | B2 |
| POMT1 10585       | B2 |
| POMT2 29954       | B2 |
| POMZP3 22932      | B2 |
| PON1 5444         | B2 |
| PON2 5445         | B2 |
| PON3 5446         | B2 |
| POP5 51367        | B2 |
| POPDC2 64091      | B2 |
| POPDC3 64208      | B2 |
| PORCN 64840       | B2 |
| POR 5447          | B2 |
| POT1 25913        | B2 |
| POTEA 340441      | B2 |
| POTEB 339010      | B2 |
| POTEC 388468      | B2 |
| POTED 317754      | B2 |

|                    |    |
|--------------------|----|
| POTEE 445582       | B2 |
| POTEF 728378       | B2 |
| POTEG 404785       | B2 |
| POTEH 23784        | B2 |
| POU1F1 5449        | B2 |
| POU2AF1 5450       | B2 |
| POU2F2 5452        | B2 |
| POU2F3 25833       | B2 |
| POU3F1 5453        | B2 |
| POU3F2 5454        | B2 |
| POU3F3 5455        | B2 |
| POU3F4 5456        | B2 |
| POU4F1 5457        | B2 |
| POU4F2 5458        | B2 |
| POU4F3 5459        | B2 |
| POU5F1B 5462       | B2 |
| POU5F1 5460        | B2 |
| POU5F2 134187      | B2 |
| POU6F2 11281       | B2 |
| PPA1 5464          | B2 |
| PPAN-P2RY11 692312 | B2 |
| PPAN 56342         | B2 |
| PPAP2C 8612        | B2 |
| PPAPDC1B 84513     | B2 |
| PPAPDC2 403313     | B2 |
| PPAPDC3 84814      | B2 |
| PPARD 5467         | B2 |
| PPARGC1A 10891     | B2 |
| PPBPL2 10895       | B2 |
| PPBP 5473          | B2 |
| PPCDC 60490        | B2 |
| PPEF1 5475         | B2 |
| PPEF2 5470         | B2 |
| PPFIA1 8500        | B2 |
| PPFIA2 8499        | B2 |
| PPFIA4 8497        | B2 |
| PPFIBP1 8496       | B2 |
| PPFIBP2 8495       | B2 |
| PPHLN1 51535       | B2 |
| PPIAL4D 645142     | B2 |
| PPIAL4E 730262     | B2 |
| PPIC 5480          | B2 |
| PPID 5481          | B2 |
| PPIE 10450         | B2 |
| PPIF 10105         | B2 |
| PPIG 9360          | B2 |
| PPIL3 53938        | B2 |
| PPIL4 85313        | B2 |
| PPIL6 285755       | B2 |
| PPIP5K1 9677       | B2 |
| PPIP5K2 23262      | B2 |

|                 |    |
|-----------------|----|
| PPM1A 5494      | B2 |
| PPM1B 5495      | B2 |
| PPM1D 8493      | B2 |
| PPM1E 22843     | B2 |
| PPM1K 152926    | B2 |
| PPM1L 151742    | B2 |
| PPM1N 147699    | B2 |
| PPP1CB 5500     | B2 |
| PPP1CC 5501     | B2 |
| PPP1R13B 23368  | B2 |
| PPP1R13L 10848  | B2 |
| PPP1R14C 81706  | B2 |
| PPP1R14D 54866  | B2 |
| PPP1R15B 84919  | B2 |
| PPP1R16A 84988  | B2 |
| PPP1R1C 151242  | B2 |
| PPP1R2P1 5505   | B2 |
| PPP1R2P3 153743 | B2 |
| PPP1R2P9 80316  | B2 |
| PPP1R2 5504     | B2 |
| PPP1R3A 5506    | B2 |
| PPP1R3B 79660   | B2 |
| PPP1R3C 5507    | B2 |
| PPP1R3D 5509    | B2 |
| PPP1R3F 89801   | B2 |
| PPP1R7 5510     | B2 |
| PPP1R8 5511     | B2 |
| PPP1R9A 55607   | B2 |
| PPP2R2A 5520    | B2 |
| PPP2R2D 55844   | B2 |
| PPP2R3A 5523    | B2 |
| PPP2R3B 28227   | B2 |
| PPP2R3C 55012   | B2 |
| PPP2R5A 5525    | B2 |
| PPP2R5B 5526    | B2 |
| PPP2R5C 5527    | B2 |
| PPP2R5D 5528    | B2 |
| PPP3CA 5530     | B2 |
| PPP3CB 5532     | B2 |
| PPP3R1 5534     | B2 |
| PPP3R2 5535     | B2 |
| PPP4R1 9989     | B2 |
| PPP4R2 151987   | B2 |
| PPP4R4 57718    | B2 |
| PPP6C 5537      | B2 |
| PPPDE2 27351    | B2 |
| PPRC1 23082     | B2 |
| PPT2 9374       | B2 |
| PPTC7 160760    | B2 |
| PPY2 23614      | B2 |
| PPYR1 5540      | B2 |

|                 |    |
|-----------------|----|
| PPY 5539        | B2 |
| PQBP1 10084     | B2 |
| PQLC3 130814    | B2 |
| PRAM1 84106     | B2 |
| PRAMEF11 440560 | B2 |
| PRAMEF14 729528 | B2 |
| PRAMEF16 654348 | B2 |
| PRAMEF20 645425 | B2 |
| PRAMEF22 653606 | B2 |
| PRAMEF2 65122   | B2 |
| PRAMEF4 400735  | B2 |
| PRAMEF8 391002  | B2 |
| PRAME 23532     | B2 |
| PRAP1 118471    | B2 |
| PRB1 5542       | B2 |
| PRB2 653247     | B2 |
| PRB3 5544       | B2 |
| PRB4 5545       | B2 |
| PRCP 5547       | B2 |
| PRDM10 56980    | B2 |
| PRDM12 59335    | B2 |
| PRDM13 59336    | B2 |
| PRDM14 63978    | B2 |
| PRDM15 63977    | B2 |
| PRDM1 639       | B2 |
| PRDM4 11108     | B2 |
| PRDM6 93166     | B2 |
| PRDM7 11105     | B2 |
| PRDM9 56979     | B2 |
| PRDX3 10935     | B2 |
| PRDX5 25824     | B2 |
| PRDX6 9588      | B2 |
| PREB 10113      | B2 |
| PRELID2 153768  | B2 |
| PREPL 9581      | B2 |
| PREP 5550       | B2 |
| PREX1 57580     | B2 |
| PRF1 5551       | B2 |
| PRG1 23574      | B2 |
| PRG2 5553       | B2 |
| PRG4 10216      | B2 |
| PRH1 5554       | B2 |
| PRH2 5555       | B2 |
| PRHOXNB 646625  | B2 |
| PRIC285 85441   | B2 |
| PRICKLE1 144165 | B2 |
| PRICKLE3 4007   | B2 |
| PRICKLE4 29964  | B2 |
| PRINS 100169750 | B2 |
| PRKAA1 5562     | B2 |
| PRKAA2 5563     | B2 |

|                |    |
|----------------|----|
| PRKAB1 5564    | B2 |
| PRKAB2 5565    | B2 |
| PRKACA 5566    | B2 |
| PRKACB 5567    | B2 |
| PRKACG 5568    | B2 |
| PRKAG1 5571    | B2 |
| PRKAG3 53632   | B2 |
| PRKAR1A 5573   | B2 |
| PRKAR2A 5576   | B2 |
| PRKCB 5579     | B2 |
| PRKCDBP 112464 | B2 |
| PRKCD 5580     | B2 |
| PRKCE 5581     | B2 |
| PRKCG 5582     | B2 |
| PRKCI 5584     | B2 |
| PRKCQ 5588     | B2 |
| PRKCSH 5589    | B2 |
| PRKD2 25865    | B2 |
| PRKG1 5592     | B2 |
| PRKG2 5593     | B2 |
| PRKRA 8575     | B2 |
| PRKRIP1 79706  | B2 |
| PRKRIR 5612    | B2 |
| PRKX 5613      | B2 |
| PRKY 5616      | B2 |
| PRLHR 2834     | B2 |
| PRLH 51052     | B2 |
| PRL 5617       | B2 |
| PRMT1 3276     | B2 |
| PRMT3 10196    | B2 |
| PRMT5 10419    | B2 |
| PRMT6 55170    | B2 |
| PRMT7 54496    | B2 |
| PRMT8 56341    | B2 |
| PRND 23627     | B2 |
| PRO0611 28997  | B2 |
| PRO0628 29053  | B2 |
| PRO1768 29018  | B2 |
| PROCA1 147011  | B2 |
| PRODH 5625     | B2 |
| PROK1 84432    | B2 |
| PROK2 60675    | B2 |
| PROKR2 128674  | B2 |
| PROL1 58503    | B2 |
| PROM1 8842     | B2 |
| PROP1 5626     | B2 |
| PROSC 11212    | B2 |
| PROX2 283571   | B2 |
| PROZ 8858      | B2 |
| PRPF18 8559    | B2 |
| PRPF31 26121   | B2 |

|                     |    |
|---------------------|----|
| PRPF38A 84950       | B2 |
| PRPF38B 55119       | B2 |
| PRPF39 55015        | B2 |
| PRPF3 9129          | B2 |
| PRPF40B 25766       | B2 |
| PRPF4B 8899         | B2 |
| PRPF6 24148         | B2 |
| PRPF8 10594         | B2 |
| PRPH2 5961          | B2 |
| PRPH 5630           | B2 |
| PRPS1L1 221823      | B2 |
| PRPSAP1 5635        | B2 |
| PRPSAP2 5636        | B2 |
| PRR11 55771         | B2 |
| PRR12 57479         | B2 |
| PRR15L 79170        | B2 |
| PRR16 51334         | B2 |
| PRR18 285800        | B2 |
| PRR22 163154        | B2 |
| PRR23A 729627       | B2 |
| PRR24 255783        | B2 |
| PRR25 388199        | B2 |
| PRR3 80742          | B2 |
| PRR4 11272          | B2 |
| PRR5-ARHGAP8 553158 | B2 |
| PRR5L 79899         | B2 |
| PRRG2 5639          | B2 |
| PRRG4 79056         | B2 |
| PRRT1 80863         | B2 |
| PRRT2 112476        | B2 |
| PRRX1 5396          | B2 |
| PRRX2 51450         | B2 |
| PRSS12 8492         | B2 |
| PRSS16 10279        | B2 |
| PRSS1 5644          | B2 |
| PRSS21 10942        | B2 |
| PRSS22 64063        | B2 |
| PRSS23 11098        | B2 |
| PRSS27 83886        | B2 |
| PRSS30P 124221      | B2 |
| PRSS33 260429       | B2 |
| PRSS35 167681       | B2 |
| PRSS36 146547       | B2 |
| PRSS37 136242       | B2 |
| PRSS38 339501       | B2 |
| PRSS3 5646          | B2 |
| PRSS41 360226       | B2 |
| PRSS42 339906       | B2 |
| PRSS45 377047       | B2 |
| PRSS48 345062       | B2 |
| PRSS53 339105       | B2 |

|                    |    |
|--------------------|----|
| PRSS54 221191      | B2 |
| PRSSL1 400668      | B2 |
| PRTFDC1 56952      | B2 |
| PRTG 283659        | B2 |
| PRTN3 5657         | B2 |
| PSAPL1 768239      | B2 |
| PSAP 5660          | B2 |
| PSAT1 29968        | B2 |
| PSCA 8000          | B2 |
| PSD2 84249         | B2 |
| PSD3 23362         | B2 |
| PSD4 23550         | B2 |
| PSD 5662           | B2 |
| PSG10 653492       | B2 |
| PSG11 5680         | B2 |
| PSG1 5669          | B2 |
| PSG2 5670          | B2 |
| PSG3 5671          | B2 |
| PSG4 5672          | B2 |
| PSG5 5673          | B2 |
| PSG6 5675          | B2 |
| PSG7 5676          | B2 |
| PSG8 440533        | B2 |
| PSG9 5678          | B2 |
| PSIMCT-1 100101490 | B2 |
| PSIP1 11168        | B2 |
| PSKH2 85481        | B2 |
| PSMA1 5682         | B2 |
| PSMA8 143471       | B2 |
| PSMB10 5699        | B2 |
| PSMB11 122706      | B2 |
| PSMB1 5689         | B2 |
| PSMB6 5694         | B2 |
| PSMB7 5695         | B2 |
| PSMB8 5696         | B2 |
| PSMB9 5698         | B2 |
| PSMC1 5700         | B2 |
| PSMC3 5702         | B2 |
| PSMC5 5705         | B2 |
| PSMD13 5719        | B2 |
| PSMD3 5709         | B2 |
| PSMD6 9861         | B2 |
| PSMD7 5713         | B2 |
| PSMD8 5714         | B2 |
| PSMD9 5715         | B2 |
| PSMF1 9491         | B2 |
| PSMG1 8624         | B2 |
| PSMG2 56984        | B2 |
| PSMG4 389362       | B2 |
| PSORS1C1 170679    | B2 |
| PSORS1C2 170680    | B2 |

|                    |    |
|--------------------|----|
| PSORS1C3 100130889 | B2 |
| PSPH 5723          | B2 |
| PSPN 5623          | B2 |
| PSTK 118672        | B2 |
| PSTPIP1 9051       | B2 |
| PSTPIP2 9050       | B2 |
| PTAFR 5724         | B2 |
| PTBP2 58155        | B2 |
| PTCD2 79810        | B2 |
| PTCD3 55037        | B2 |
| PTCHD2 57540       | B2 |
| PTCHD3 374308      | B2 |
| PTCRA 171558       | B2 |
| PTDSS1 9791        | B2 |
| PTDSS2 81490       | B2 |
| PTENP1 11191       | B2 |
| PTER 9317          | B2 |
| PTF1A 256297       | B2 |
| PTGDR 5729         | B2 |
| PTGER1 5731        | B2 |
| PTGER2 5732        | B2 |
| PTGES2 80142       | B2 |
| PTGES 9536         | B2 |
| PTGFRN 5738        | B2 |
| PTGIR 5739         | B2 |
| PTGR1 22949        | B2 |
| PTGR2 145482       | B2 |
| PTGS1 5742         | B2 |
| PTGS2 5743         | B2 |
| PTH2R 5746         | B2 |
| PTH2 113091        | B2 |
| PTHLH 5744         | B2 |
| PTK2B 2185         | B2 |
| PTOV1 53635        | B2 |
| PTP4A1 7803        | B2 |
| PTP4A2 8073        | B2 |
| PTP4A3 11156       | B2 |
| PTPDC1 138639      | B2 |
| PTPLAD2 401494     | B2 |
| PTPLB 201562       | B2 |
| PTPMT1 114971      | B2 |
| PTPN12 5782        | B2 |
| PTPN13 5783        | B2 |
| PTPN18 26469       | B2 |
| PTPN1 5770         | B2 |
| PTPN20A 653129     | B2 |
| PTPN20B 26095      | B2 |
| PTPN22 26191       | B2 |
| PTPN23 25930       | B2 |
| PTPN2 5771         | B2 |
| PTPN3 5774         | B2 |



|               |    |
|---------------|----|
| PTPN5 84867   | B2 |
| PTPN7 5778    | B2 |
| PTPN9 5780    | B2 |
| PTPRA 5786    | B2 |
| PTPRCAP 5790  | B2 |
| PTPRC 5788    | B2 |
| PTPRD 5789    | B2 |
| PTPRE 5791    | B2 |
| PTPRF 5792    | B2 |
| PTPRH 5794    | B2 |
| PTPRJ 5795    | B2 |
| PTPRK 5796    | B2 |
| PTPRN2 5799   | B2 |
| PTPRN 5798    | B2 |
| PTPRO 5800    | B2 |
| PTPRQ 374462  | B2 |
| PTPRR 5801    | B2 |
| PTPRT 11122   | B2 |
| PTPRU 10076   | B2 |
| PTPRVP 148713 | B2 |
| PTRH2 51651   | B2 |
| PTTG2 10744   | B2 |
| PTX3 5806     | B2 |
| PTX4 390667   | B2 |
| PUM1 9698     | B2 |
| PUM2 23369    | B2 |
| PURA 5813     | B2 |
| PURB 5814     | B2 |
| PURG 29942    | B2 |
| PUS10 150962  | B2 |
| PUS1 80324    | B2 |
| PUS3 83480    | B2 |
| PVALB 5816    | B2 |
| PVRIG 79037   | B2 |
| PVRL1 5818    | B2 |
| PVR 5817      | B2 |
| PVT1 5820     | B2 |
| PWP1 11137    | B2 |
| PWP2 5822     | B2 |
| PWRN1 791114  | B2 |
| PWRN2 791115  | B2 |
| PWWP2A 114825 | B2 |
| PWWP2B 170394 | B2 |
| PXDNL 137902  | B2 |
| PXDN 7837     | B2 |
| PXK 54899     | B2 |
| PXMP2 5827    | B2 |
| PXMP4 11264   | B2 |
| PXT1 222659   | B2 |
| PYDC1 260434  | B2 |
| PYGB 5834     | B2 |

|                 |    |
|-----------------|----|
| PYGL 5836       | B2 |
| PYGM 5837       | B2 |
| PYGO1 26108     | B2 |
| PYHIN1 149628   | B2 |
| PYROXD1 79912   | B2 |
| PYY2 23615      | B2 |
| PYY 5697        | B2 |
| QARS 5859       | B2 |
| QDPR 5860       | B2 |
| QPCTL 54814     | B2 |
| QPCT 25797      | B2 |
| QPRT 23475      | B2 |
| QRFPR 84109     | B2 |
| QRFP 347148     | B2 |
| QRICH1 54870    | B2 |
| QRICH2 84074    | B2 |
| QRSL1 55278     | B2 |
| QSER1 79832     | B2 |
| QSOX1 5768      | B2 |
| QSOX2 169714    | B2 |
| QTRT1 81890     | B2 |
| R3HDM2 22864    | B2 |
| R3HDML 140902   | B2 |
| RAB11A 8766     | B2 |
| RAB11B 9230     | B2 |
| RAB11FIP1 80223 | B2 |
| RAB11FIP5 26056 | B2 |
| RAB12 201475    | B2 |
| RAB14 51552     | B2 |
| RAB15 376267    | B2 |
| RAB18 22931     | B2 |
| RAB1B 81876     | B2 |
| RAB20 55647     | B2 |
| RAB21 23011     | B2 |
| RAB22A 57403    | B2 |
| RAB23 51715     | B2 |
| RAB24 53917     | B2 |
| RAB27A 5873     | B2 |
| RAB27B 5874     | B2 |
| RAB2B 84932     | B2 |
| RAB30 27314     | B2 |
| RAB32 10981     | B2 |
| RAB33B 83452    | B2 |
| RAB34 83871     | B2 |
| RAB35 11021     | B2 |
| RAB36 9609      | B2 |
| RAB37 326624    | B2 |
| RAB38 23682     | B2 |
| RAB39B 116442   | B2 |
| RAB39 54734     | B2 |
| RAB3B 5865      | B2 |

|                 |    |
|-----------------|----|
| RAB3C 115827    | B2 |
| RAB3GAP1 22930  | B2 |
| RAB3GAP2 25782  | B2 |
| RAB40AL 282808  | B2 |
| RAB41 347517    | B2 |
| RAB42 115273    | B2 |
| RAB43 339122    | B2 |
| RAB4A 5867      | B2 |
| RAB5A 5868      | B2 |
| RAB5B 5869      | B2 |
| RAB5C 5878      | B2 |
| RAB6C 84084     | B2 |
| RAB7A 7879      | B2 |
| RAB7L1 8934     | B2 |
| RAB8B 51762     | B2 |
| RAB9A 9367      | B2 |
| RABAC1 10567    | B2 |
| RABEP1 9135     | B2 |
| RABGAP1L 9910   | B2 |
| RABGAP1 23637   | B2 |
| RABGEF1 27342   | B2 |
| RABGGTA 5875    | B2 |
| RABGGTB 5876    | B2 |
| RABL2A 11159    | B2 |
| RABL2B 11158    | B2 |
| RABL3 285282    | B2 |
| RAC1 5879       | B2 |
| RAC2 5880       | B2 |
| RAD17 5884      | B2 |
| RAD18 56852     | B2 |
| RAD21L1 642636  | B2 |
| RAD23A 5886     | B2 |
| RAD23B 5887     | B2 |
| RAD50 10111     | B2 |
| RAD51AP2 729475 | B2 |
| RAD51C 5889     | B2 |
| RAD51L1 5890    | B2 |
| RAD51L3 5892    | B2 |
| RAD52 5893      | B2 |
| RAD9A 5883      | B2 |
| RAD9B 144715    | B2 |
| RAET1E 135250   | B2 |
| RAET1G 353091   | B2 |
| RAET1L 154064   | B2 |
| RAF1 5894       | B2 |
| RAG2 5897       | B2 |
| RAGE 5891       | B2 |
| RAI1 10743      | B2 |
| RALBP1 10928    | B2 |
| RALB 5899       | B2 |
| RALGAPA1 253959 | B2 |

|                 |    |
|-----------------|----|
| RALGAPA2 57186  | B2 |
| RALGAPB 57148   | B2 |
| RALGPS1 9649    | B2 |
| RALYL 138046    | B2 |
| RAMP1 10267     | B2 |
| RAMP3 10268     | B2 |
| RANBP2 5903     | B2 |
| RANBP3L 202151  | B2 |
| RANBP3 8498     | B2 |
| RANBP6 26953    | B2 |
| RANGRF 29098    | B2 |
| RAP1A 5906      | B2 |
| RAP1B 5908      | B2 |
| RAP1GAP2 23108  | B2 |
| RAP1GAP 5909    | B2 |
| RAP1GDS1 5910   | B2 |
| RAP2A 5911      | B2 |
| RAP2B 5912      | B2 |
| RAPGEF4 11069   | B2 |
| RAPGEF5 9771    | B2 |
| RAPGEF6 51735   | B2 |
| RAPGEFL1 51195  | B2 |
| RAPH1 65059     | B2 |
| RAPSN 5913      | B2 |
| RARA 5914       | B2 |
| RARG 5916       | B2 |
| RARRES1 5918    | B2 |
| RARS2 57038     | B2 |
| RASA1 5921      | B2 |
| RASA4P 401331   | B2 |
| RASAL1 8437     | B2 |
| RASAL2 9462     | B2 |
| RASAL3 64926    | B2 |
| RASD2 23551     | B2 |
| RASEF 158158    | B2 |
| RASGEF1A 221002 | B2 |
| RASGEF1C 255426 | B2 |
| RASGRF1 5923    | B2 |
| RASGRF2 5924    | B2 |
| RASGRP1 10125   | B2 |
| RASGRP3 25780   | B2 |
| RASGRP4 115727  | B2 |
| RASL10B 91608   | B2 |
| RASSF10 644943  | B2 |
| RASSF2 9770     | B2 |
| RASSF4 83937    | B2 |
| RASSF5 83593    | B2 |
| RASSF8 11228    | B2 |
| RAX 30062       | B2 |
| RB1CC1 9821     | B2 |
| RB1 5925        | B2 |

|              |    |
|--------------|----|
| RBAK 57786   | B2 |
| RBBP6 5930   | B2 |
| RBBP7 5931   | B2 |
| RBBP8 5932   | B2 |
| RBBP9 10741  | B2 |
| RBCK1 10616  | B2 |
| RBM10 8241   | B2 |
| RBM11 54033  | B2 |
| RBM12 10137  | B2 |
| RBM14 10432  | B2 |
| RBM15B 29890 | B2 |
| RBM15 64783  | B2 |
| RBM16 22828  | B2 |
| RBM17 84991  | B2 |
| RBM18 92400  | B2 |
| RBM19 9904   | B2 |
| RBM20 282996 | B2 |
| RBM22 55696  | B2 |
| RBM23 55147  | B2 |
| RBM24 221662 | B2 |
| RBM25 58517  | B2 |
| RBM26 64062  | B2 |
| RBM27 54439  | B2 |
| RBM28 55131  | B2 |
| RBM38 55544  | B2 |
| RBM39 9584   | B2 |
| RBM3 5935    | B2 |
| RBM41 55285  | B2 |
| RBM42 79171  | B2 |
| RBM43 375287 | B2 |
| RBM44 375316 | B2 |
| RBM46 166863 | B2 |
| RBM4B 83759  | B2 |
| RBMX2 51634  | B2 |
| RBMXL2 27288 | B2 |
| RBMX 27316   | B2 |
| RBP1 5947    | B2 |
| RBP2 5948    | B2 |
| RBP3 5949    | B2 |
| RBP5 83758   | B2 |
| RBPJL 11317  | B2 |
| RC3H1 149041 | B2 |
| RC3H2 54542  | B2 |
| RCAN3 11123  | B2 |
| RCBTB1 55213 | B2 |
| RCCD1 91433  | B2 |
| RCE1 9986    | B2 |
| RCHY1 25898  | B2 |
| RCL1 10171   | B2 |
| RCN1 5954    | B2 |
| RCN2 5955    | B2 |

|                |    |
|----------------|----|
| RCN3 57333     | B2 |
| RCOR1 23186    | B2 |
| RCOR2 283248   | B2 |
| RCOR3 55758    | B2 |
| RD3 343035     | B2 |
| RDBP 7936      | B2 |
| RDH10 157506   | B2 |
| RDH12 145226   | B2 |
| RDH14 57665    | B2 |
| RDH16 8608     | B2 |
| RDH8 50700     | B2 |
| RDX 5962       | B2 |
| REC8 9985      | B2 |
| RECQL5 9400    | B2 |
| RECQL 5965     | B2 |
| REEP1 65055    | B2 |
| REEP2 51308    | B2 |
| REEP3 221035   | B2 |
| REEP5 7905     | B2 |
| REEP6 92840    | B2 |
| REG1A 5967     | B2 |
| REG3G 130120   | B2 |
| REG4 83998     | B2 |
| RELA 5970      | B2 |
| RELB 5971      | B2 |
| RELL1 768211   | B2 |
| REL 5966       | B2 |
| RENBP 5973     | B2 |
| REN 5972       | B2 |
| REP15 387849   | B2 |
| REPS1 85021    | B2 |
| RER1 11079     | B2 |
| REG 85004      | B2 |
| RESP18 389075  | B2 |
| REST 5978      | B2 |
| RETNLB 84666   | B2 |
| RETN 56729     | B2 |
| RET 5979       | B2 |
| REXO1L1 254958 | B2 |
| REXO1 57455    | B2 |
| REXO2 25996    | B2 |
| REXO4 57109    | B2 |
| RFC1 5981      | B2 |
| RFESD 317671   | B2 |
| RFK 55312      | B2 |
| RFNG 5986      | B2 |
| RFPL1S 10740   | B2 |
| RFPL1 5988     | B2 |
| RFPL2 10739    | B2 |
| RFPL3S 10737   | B2 |
| RFPL3 10738    | B2 |

|               |    |
|---------------|----|
| RFPL4A 342931 | B2 |
| RFPL4B 442247 | B2 |
| RFT1 91869    | B2 |
| RFTN1 23180   | B2 |
| RFX1 5989     | B2 |
| RFX3 5991     | B2 |
| RFX4 5992     | B2 |
| RFX6 222546   | B2 |
| RFX7 64864    | B2 |
| RFX8 731220   | B2 |
| RG9MTD1 54931 | B2 |
| RGAG1 57529   | B2 |
| RGL2 5863     | B2 |
| RGL3 57139    | B2 |
| RGL4 266747   | B2 |
| RGP1 9827     | B2 |
| RGPD1 400966  | B2 |
| RGPD8 727851  | B2 |
| RGR 5995      | B2 |
| RGS11 8786    | B2 |
| RGS13 6003    | B2 |
| RGS16 6004    | B2 |
| RGS17 26575   | B2 |
| RGS18 64407   | B2 |
| RGS1 5996     | B2 |
| RGS20 8601    | B2 |
| RGS21 431704  | B2 |
| RGS22 26166   | B2 |
| RGS3 5998     | B2 |
| RGS7 6000     | B2 |
| RGS8 85397    | B2 |
| RGS9BP 388531 | B2 |
| RGS9 8787     | B2 |
| RGSL1 353299  | B2 |
| RHAG 6005     | B2 |
| RHBDD1 84236  | B2 |
| RHBDL3 162494 | B2 |
| RHBG 57127    | B2 |
| RHCG 51458    | B2 |
| RHD 6007      | B2 |
| RHEBL1 121268 | B2 |
| RHEB 6009     | B2 |
| RHOA 387      | B2 |
| RHOBTB1 9886  | B2 |
| RHOBTB2 23221 | B2 |
| RHOBTB3 22836 | B2 |
| RHOB 388      | B2 |
| RHOC 389      | B2 |
| RHOG 391      | B2 |
| RHOH 399      | B2 |
| RHOT1 55288   | B2 |

|                |    |
|----------------|----|
| RHOV 171177    | B2 |
| RHOXF2B 727940 | B2 |
| RHO 6010       | B2 |
| RHPN2 85415    | B2 |
| RIBC1 158787   | B2 |
| RIC8A 60626    | B2 |
| RIC8B 55188    | B2 |
| RICH2 9912     | B2 |
| RICTOR 253260  | B2 |
| RIF1 55183     | B2 |
| RIMBP2 23504   | B2 |
| RIMBP3C 150221 | B2 |
| RIMBP3 85376   | B2 |
| RIMKLA 284716  | B2 |
| RIMS1 22999    | B2 |
| RIMS2 9699     | B2 |
| RIN1 9610      | B2 |
| RIN2 54453     | B2 |
| RIN3 79890     | B2 |
| RING1 6015     | B2 |
| RINL 126432    | B2 |
| RIOK1 83732    | B2 |
| RIOK2 55781    | B2 |
| RIOK3 8780     | B2 |
| RIPK1 8737     | B2 |
| RIPK3 11035    | B2 |
| RIPPLY1 92129  | B2 |
| RIPPLY2 134701 | B2 |
| RIT2 6014      | B2 |
| RLBP1 6017     | B2 |
| RLF 6018       | B2 |
| RLIM 51132     | B2 |
| RLN1 6013      | B2 |
| RLN2 6019      | B2 |
| RLN3 117579    | B2 |
| RLTPR 146206   | B2 |
| RMND1 55005    | B2 |
| RMND5A 64795   | B2 |
| RMRP 6023      | B2 |
| RMST 196475    | B2 |
| RNASE10 338879 | B2 |
| RNASE11 122651 | B2 |
| RNASE12 493901 | B2 |
| RNASE2 6036    | B2 |
| RNASE3 6037    | B2 |
| RNASE6 6039    | B2 |
| RNASE8 122665  | B2 |
| RNASEH1 246243 | B2 |
| RNASEH2B 79621 | B2 |
| RNASEH2C 84153 | B2 |
| RNASEK 440400  | B2 |



|                 |    |
|-----------------|----|
| RNASEL 6041     | B2 |
| RNASEN 29102    | B2 |
| RNASET2 8635    | B2 |
| RND2 8153       | B2 |
| RNF10 9921      | B2 |
| RNF111 54778    | B2 |
| RNF113A 7737    | B2 |
| RNF113B 140432  | B2 |
| RNF114 55905    | B2 |
| RNF121 55298    | B2 |
| RNF122 79845    | B2 |
| RNF123 63891    | B2 |
| RNF126P1 376412 | B2 |
| RNF126 55658    | B2 |
| RNF128 79589    | B2 |
| RNF133 168433   | B2 |
| RNF135 84282    | B2 |
| RNF138 51444    | B2 |
| RNF13 11342     | B2 |
| RNF141 50862    | B2 |
| RNF144A 9781    | B2 |
| RNF144B 255488  | B2 |
| RNF148 378925   | B2 |
| RNF14 9604      | B2 |
| RNF151 146310   | B2 |
| RNF152 220441   | B2 |
| RNF160 26046    | B2 |
| RNF166 115992   | B2 |
| RNF167 26001    | B2 |
| RNF168 165918   | B2 |
| RNF169 254225   | B2 |
| RNF170 81790    | B2 |
| RNF175 285533   | B2 |
| RNF17 56163     | B2 |
| RNF182 221687   | B2 |
| RNF183 138065   | B2 |
| RNF19A 25897    | B2 |
| RNF19B 127544   | B2 |
| RNF207 388591   | B2 |
| RNF20 56254     | B2 |
| RNF212 285498   | B2 |
| RNF215 200312   | B2 |
| RNF216L 441191  | B2 |
| RNF216 54476    | B2 |
| RNF219 79596    | B2 |
| RNF220 55182    | B2 |
| RNF222 643904   | B2 |
| RNF24 11237     | B2 |
| RNF25 64320     | B2 |
| RNF26 79102     | B2 |
| RNF31 55072     | B2 |

|                    |    |
|--------------------|----|
| RNF32 140545       | B2 |
| RNF39 80352        | B2 |
| RNF43 54894        | B2 |
| RNF44 22838        | B2 |
| RNF5P1 286140      | B2 |
| RNF5 6048          | B2 |
| RNF6 6049          | B2 |
| RNF8 9025          | B2 |
| RNFT1 51136        | B2 |
| RNGTT 8732         | B2 |
| RNH1 6050          | B2 |
| RNMTL1 55178       | B2 |
| RNMT 8731          | B2 |
| RNPEPL1 57140      | B2 |
| RNU11 26824        | B2 |
| RNU4ATAC 100151683 | B2 |
| RNU6ATAC 100151684 | B2 |
| ROBO1 6091         | B2 |
| ROBO2 6092         | B2 |
| ROCK1 6093         | B2 |
| ROM1 6094          | B2 |
| ROMO1 140823       | B2 |
| ROPN1B 152015      | B2 |
| ROPN1L 83853       | B2 |
| ROPN1 54763        | B2 |
| RORA 6095          | B2 |
| RORB 6096          | B2 |
| RORC 6097          | B2 |
| ROS1 6098          | B2 |
| RP1-177G6.2 286411 | B2 |
| RP1 6101           | B2 |
| RP2 6102           | B2 |
| RP9P 441212        | B2 |
| RP9 6100           | B2 |
| RPA1 6117          | B2 |
| RPA2 6118          | B2 |
| RPA4 29935         | B2 |
| RPAIN 84268        | B2 |
| RPAP1 26015        | B2 |
| RPAP2 79871        | B2 |
| RPF1 80135         | B2 |
| RPF2 84154         | B2 |
| RPGRIP1 57096      | B2 |
| RPH3AL 9501        | B2 |
| RPH3A 22895        | B2 |
| RPIA 22934         | B2 |
| RPL10L 140801      | B2 |
| RPL10 6134         | B2 |
| RPL12 6136         | B2 |
| RPL13AP17 399670   | B2 |
| RPL13AP20 387841   | B2 |

|                    |    |
|--------------------|----|
| RPL13AP3 645683    | B2 |
| RPL13AP6 644511    | B2 |
| RPL13A 23521       | B2 |
| RPL13P5 283345     | B2 |
| RPL13 6137         | B2 |
| RPL14 9045         | B2 |
| RPL17 6139         | B2 |
| RPL18A 6142        | B2 |
| RPL18 6141         | B2 |
| RPL19P12 100129424 | B2 |
| RPL19 6143         | B2 |
| RPL22L1 200916     | B2 |
| RPL23AP7 118433    | B2 |
| RPL23AP82 284942   | B2 |
| RPL23A 6147        | B2 |
| RPL23P8 222901     | B2 |
| RPL23 9349         | B2 |
| RPL24 6152         | B2 |
| RPL27A 6157        | B2 |
| RPL27 6155         | B2 |
| RPL28 6158         | B2 |
| RPL29P2 118432     | B2 |
| RPL29 6159         | B2 |
| RPL30 6156         | B2 |
| RPL31 6160         | B2 |
| RPL32P3 132241     | B2 |
| RPL35A 6165        | B2 |
| RPL35 11224        | B2 |
| RPL36AL 6166       | B2 |
| RPL36A 6173        | B2 |
| RPL36 25873        | B2 |
| RPL37A 6168        | B2 |
| RPL37 6167         | B2 |
| RPL38 6169         | B2 |
| RPL39 6170         | B2 |
| RPL3L 6123         | B2 |
| RPL41 6171         | B2 |
| RPL6 6128          | B2 |
| RPL7A 6130         | B2 |
| RPL7L1 285855      | B2 |
| RPL7 6129          | B2 |
| RPL8 6132          | B2 |
| RPL9 6133          | B2 |
| RPLP0 6175         | B2 |
| RPLP1 6176         | B2 |
| RPLP2 6181         | B2 |
| RPP14 11102        | B2 |
| RPP25 54913        | B2 |
| RPP38 10557        | B2 |
| RPPH1 85495        | B2 |
| RPRD1A 55197       | B2 |

|                  |    |
|------------------|----|
| RPRD1B 58490     | B2 |
| RPRML 388394     | B2 |
| RPRM 56475       | B2 |
| RPS10P7 376693   | B2 |
| RPS10 6204       | B2 |
| RPS11 6205       | B2 |
| RPS12 6206       | B2 |
| RPS15AP10 728963 | B2 |
| RPS15A 6210      | B2 |
| RPS15 6209       | B2 |
| RPS16 6217       | B2 |
| RPS17 6218       | B2 |
| RPS18 6222       | B2 |
| RPS19BP1 91582   | B2 |
| RPS19 6223       | B2 |
| RPS21 6227       | B2 |
| RPS24 6229       | B2 |
| RPS26P11 441502  | B2 |
| RPS26 6231       | B2 |
| RPS27L 51065     | B2 |
| RPS27 6232       | B2 |
| RPS28 6234       | B2 |
| RPS29 6235       | B2 |
| RPS2P32 256355   | B2 |
| RPS2 6187        | B2 |
| RPS3 6188        | B2 |
| RPS4X 6191       | B2 |
| RPS4Y1 6192      | B2 |
| RPS5 6193        | B2 |
| RPS6KA4 8986     | B2 |
| RPS6KA6 27330    | B2 |
| RPS6KB1 6198     | B2 |
| RPS6KL1 83694    | B2 |
| RPS6 6194        | B2 |
| RPS7 6201        | B2 |
| RPS8 6202        | B2 |
| RPSAP52 204010   | B2 |
| RPSAP58 388524   | B2 |
| RPSAP9 653162    | B2 |
| RPSA 3921        | B2 |
| RPTN 126638      | B2 |
| RPTOR 57521      | B2 |
| RPUSD2 27079     | B2 |
| RPUSD3 285367    | B2 |
| RRAD 6236        | B2 |
| RRAGA 10670      | B2 |
| RRAGB 10325      | B2 |
| RRAGC 64121      | B2 |
| RRBP1 6238       | B2 |
| RREB1 6239       | B2 |
| RRH 10692        | B2 |

|                  |    |
|------------------|----|
| RRM2B 50484      | B2 |
| RRN3P2 653390    | B2 |
| RRN3P3 100131998 | B2 |
| RRP15 51018      | B2 |
| RRP1B 23076      | B2 |
| RRP1 8568        | B2 |
| RRP7A 27341      | B2 |
| RRP7B 91695      | B2 |
| RRP8 23378       | B2 |
| RRP9 9136        | B2 |
| RS1 6247         | B2 |
| RSAD1 55316      | B2 |
| RSBN1L 222194    | B2 |
| RSBN1 54665      | B2 |
| RSC1A1 6248      | B2 |
| RSF1 51773       | B2 |
| RSL1D1 26156     | B2 |
| RSL24D1 51187    | B2 |
| RSPH10B2 728194  | B2 |
| RSPH3 83861      | B2 |
| RSPH4A 345895    | B2 |
| RSPH6A 81492     | B2 |
| RSPH9 221421     | B2 |
| RSPO1 284654     | B2 |
| RSPO2 340419     | B2 |
| RSPO4 343637     | B2 |
| RSPRY1 89970     | B2 |
| RSRC1 51319      | B2 |
| RSRC2 65117      | B2 |
| RSU1 6251        | B2 |
| RTBDN 83546      | B2 |
| RTDR1 27156      | B2 |
| RTL1 51750       | B2 |
| RTF1 23168       | B2 |
| RTL1 388015      | B2 |
| RTN1 6252        | B2 |
| RTN2 6253        | B2 |
| RTN3 10313       | B2 |
| RTN4IP1 84816    | B2 |
| RTN4RL1 146760   | B2 |
| RTN4R 65078      | B2 |
| RTP1 132112      | B2 |
| RTP2 344892      | B2 |
| RTP3 83597       | B2 |
| RTP4 64108       | B2 |
| RTTN 25914       | B2 |
| RUFY1 80230      | B2 |
| RUFY2 55680      | B2 |
| RUFY3 22902      | B2 |
| RUFY4 285180     | B2 |
| RUNDC1 146923    | B2 |

|                |    |
|----------------|----|
| RUNDC2A 84127  | B2 |
| RUNDC2C 440352 | B2 |
| RUNDC3A 10900  | B2 |
| RUNX1 861      | B2 |
| RUNX3 864      | B2 |
| RWDD1 51389    | B2 |
| RWDD2A 112611  | B2 |
| RWDD2B 10069   | B2 |
| RWDD3 25950    | B2 |
| RWDD4A 201965  | B2 |
| RXFP1 59350    | B2 |
| RXFP2 122042   | B2 |
| RXFP4 339403   | B2 |
| RXRA 6256      | B2 |
| RXRB 6257      | B2 |
| RXRG 6258      | B2 |
| RYBP 23429     | B2 |
| RYR1 6261      | B2 |
| RYR2 6262      | B2 |
| S100A10 6281   | B2 |
| S100A12 6283   | B2 |
| S100A13 6284   | B2 |
| S100A1 6271    | B2 |
| S100A2 6273    | B2 |
| S100A3 6274    | B2 |
| S100A5 6276    | B2 |
| S100A6 6277    | B2 |
| S100A7A 338324 | B2 |
| S100A7 6278    | B2 |
| S100A8 6279    | B2 |
| S100A9 6280    | B2 |
| S100G 795      | B2 |
| S100PBP 64766  | B2 |
| S100P 6286     | B2 |
| S100Z 170591   | B2 |
| S1PR2 9294     | B2 |
| S1PR3 1903     | B2 |
| S1PR4 8698     | B2 |
| S1PR5 53637    | B2 |
| SACM1L 22908   | B2 |
| SAFB2 9667     | B2 |
| SAFB 6294      | B2 |
| SAGE1 55511    | B2 |
| SAG 6295       | B2 |
| SALL1 6299     | B2 |
| SALL2 6297     | B2 |
| SALL3 27164    | B2 |
| SAMD13 148418  | B2 |
| SAMD3 154075   | B2 |
| SAMD4B 55095   | B2 |
| SAMD7 344658   | B2 |

|                  |    |
|------------------|----|
| SAMD8 142891     | B2 |
| SAMD9L 219285    | B2 |
| SAMD9 54809      | B2 |
| SAMHD1 25939     | B2 |
| SAMM50 25813     | B2 |
| SAP18 10284      | B2 |
| SAP30BP 29115    | B2 |
| SAPS2 9701       | B2 |
| SAPS3 55291      | B2 |
| SAR1A 56681      | B2 |
| SARDH 1757       | B2 |
| SARM1 23098      | B2 |
| SARS2 54938      | B2 |
| SARS 6301        | B2 |
| SART1 9092       | B2 |
| SART3 9733       | B2 |
| SASH3 54440      | B2 |
| SAT1 6303        | B2 |
| SATB2 23314      | B2 |
| SATL1 340562     | B2 |
| SBDSP1 155370    | B2 |
| SBF1P1 100133234 | B2 |
| SBK2 646643      | B2 |
| SBNO1 55206      | B2 |
| SBNO2 22904      | B2 |
| SBSN 374897      | B2 |
| SC4MOL 6307      | B2 |
| SC5DL 6309       | B2 |
| SCAF1 58506      | B2 |
| SCAI 286205      | B2 |
| SCAMP1 9522      | B2 |
| SCAMP2 10066     | B2 |
| SCAMP4 113178    | B2 |
| SCAMP5 192683    | B2 |
| SCAND1 51282     | B2 |
| SCAND2 54581     | B2 |
| SCAND3 114821    | B2 |
| SCAP 22937       | B2 |
| SCARA3 51435     | B2 |
| SCARB1 949       | B2 |
| SCARB2 950       | B2 |
| SCARF2 91179     | B2 |
| SCARNA10 692148  | B2 |
| SCARNA12 677777  | B2 |
| SCARNA16 677781  | B2 |
| SCARNA1 677774   | B2 |
| SCARNA21 677763  | B2 |
| SCARNA2 677766   | B2 |
| SCARNA4 677771   | B2 |
| SCARNA5 677775   | B2 |
| SCARNA6 677772   | B2 |

|                    |    |
|--------------------|----|
| SCARNA7 677767     | B2 |
| SCARNA8 677776     | B2 |
| SCARNA9L 100158262 | B2 |
| SCARNA9 619383     | B2 |
| SCD5 79966         | B2 |
| SCD 6319           | B2 |
| SCEL 8796          | B2 |
| SCFD1 23256        | B2 |
| SCFD2 152579       | B2 |
| SCG2 7857          | B2 |
| SCG3 29106         | B2 |
| SCG5 6447          | B2 |
| SCGB1A1 7356       | B2 |
| SCGB1C1 147199     | B2 |
| SCGB1D1 10648      | B2 |
| SCGB1D2 10647      | B2 |
| SCGB1D4 404552     | B2 |
| SCGB2A1 4246       | B2 |
| SCGB2A2 4250       | B2 |
| SCGB3A1 92304      | B2 |
| SCGB3A2 117156     | B2 |
| SCGBL 284402       | B2 |
| SCGN 10590         | B2 |
| SCHIP1 29970       | B2 |
| SCIN 85477         | B2 |
| SCLT1 132320       | B2 |
| SCML2 10389        | B2 |
| SCML4 256380       | B2 |
| SCN10A 6336        | B2 |
| SCN1A 6323         | B2 |
| SCN1B 6324         | B2 |
| SCN4A 6329         | B2 |
| SCN7A 6332         | B2 |
| SCN8A 6334         | B2 |
| SCNN1A 6337        | B2 |
| SCNN1B 6338        | B2 |
| SCNN1D 6339        | B2 |
| SCNN1G 6340        | B2 |
| SCO1 6341          | B2 |
| SCOC 60592         | B2 |
| SCP2 6342          | B2 |
| SCPEP1 59342       | B2 |
| SCRG1 11341        | B2 |
| SCRIB 23513        | B2 |
| SCRN1 9805         | B2 |
| SCRN3 79634        | B2 |
| SCRT1 83482        | B2 |
| SCRT2 85508        | B2 |
| SCUBE1 80274       | B2 |
| SCUBE2 57758       | B2 |
| SCUBE3 222663      | B2 |



|                |    |
|----------------|----|
| SCXB 642658    | B2 |
| SCYL1 57410    | B2 |
| SDAD1 55153    | B2 |
| SDC2 6383      | B2 |
| SDC4 6385      | B2 |
| SDCBP2 27111   | B2 |
| SDCBP 6386     | B2 |
| SDCCAG1 9147   | B2 |
| SDCCAG3 10807  | B2 |
| SDCCAG8 10806  | B2 |
| SDF2 6388      | B2 |
| SDF4 51150     | B2 |
| SDHAF1 644096  | B2 |
| SDHAF2 54949   | B2 |
| SDHA 6389      | B2 |
| SDHB 6390      | B2 |
| SDK2 54549     | B2 |
| SDR16C5 195814 | B2 |
| SDR39U1 56948  | B2 |
| SDR42E1 93517  | B2 |
| SDR9C7 121214  | B2 |
| SEBOX 645832   | B2 |
| SEC11A 23478   | B2 |
| SEC14L2 23541  | B2 |
| SEC14L3 266629 | B2 |
| SEC14L4 284904 | B2 |
| SEC14L5 9717   | B2 |
| SEC22A 26984   | B2 |
| SEC22B 9554    | B2 |
| SEC23A 10484   | B2 |
| SEC23IP 11196  | B2 |
| SEC24A 10802   | B2 |
| SEC24B 10427   | B2 |
| SEC24C 9632    | B2 |
| SEC62 7095     | B2 |
| SEC63 11231    | B2 |
| SECISBP2 79048 | B2 |
| SEH1L 81929    | B2 |
| SEL1L2 80343   | B2 |
| SEL1L3 23231   | B2 |
| SEL1L 6400     | B2 |
| SELENBP1 8991  | B2 |
| SELE 6401      | B2 |
| SELK 58515     | B2 |
| SELL 6402      | B2 |
| SELM 140606    | B2 |
| SELO 83642     | B2 |
| SELPLG 6404    | B2 |
| SELV 348303    | B2 |
| SEMA3B 7869    | B2 |
| SEMA3E 9723    | B2 |

|                  |    |
|------------------|----|
| SEMA4A 64218     | B2 |
| SEMA4B 10509     | B2 |
| SEMA4C 54910     | B2 |
| SEMA4D 10507     | B2 |
| SEMA4F 10505     | B2 |
| SEMA4G 57715     | B2 |
| SEMA5B 54437     | B2 |
| SEMA6B 10501     | B2 |
| SEMG1 6406       | B2 |
| SEMG2 6407       | B2 |
| SENP2 59343      | B2 |
| SENP3 26168      | B2 |
| SENP5 205564     | B2 |
| SENP6 26054      | B2 |
| SENP7 57337      | B2 |
| SENP8 123228     | B2 |
| SEP15 9403       | B2 |
| SEPHS1 22929     | B2 |
| SEPN1 57190      | B2 |
| SEPSECS 51091    | B2 |
| SEPT11 55752     | B2 |
| SEPT12 124404    | B2 |
| SEPT14 346288    | B2 |
| SEPT1 1731       | B2 |
| SEPT2 4735       | B2 |
| SEPT3 55964      | B2 |
| SEPT5 5413       | B2 |
| SEPT6 23157      | B2 |
| SEPT7L 285961    | B2 |
| SEPT7P2 641977   | B2 |
| SEPT7 989        | B2 |
| SEPW1 6415       | B2 |
| SERAC1 84947     | B2 |
| SERBP1 26135     | B2 |
| SERF1A 8293      | B2 |
| SERF2 10169      | B2 |
| SERGEF 26297     | B2 |
| SERHL2 253190    | B2 |
| SERHL 94009      | B2 |
| SERINC3 10955    | B2 |
| SERINC4 619189   | B2 |
| SERINC5 256987   | B2 |
| SERP2 387923     | B2 |
| SERPINA10 51156  | B2 |
| SERPINA11 256394 | B2 |
| SERPINA12 145264 | B2 |
| SERPINA13 388007 | B2 |
| SERPINA1 5265    | B2 |
| SERPINA3 12      | B2 |
| SERPINA4 5267    | B2 |
| SERPINA5 5104    | B2 |

|                 |    |
|-----------------|----|
| SERPINA6 866    | B2 |
| SERPINA9 327657 | B2 |
| SERPINB10 5273  | B2 |
| SERPINB11 89778 | B2 |
| SERPINB12 89777 | B2 |
| SERPINB13 5275  | B2 |
| SERPINB1 1992   | B2 |
| SERPINB2 5055   | B2 |
| SERPINB3 6317   | B2 |
| SERPINB4 6318   | B2 |
| SERPINB5 5268   | B2 |
| SERPINB6 5269   | B2 |
| SERPINB7 8710   | B2 |
| SERPINB8 5271   | B2 |
| SERPINB9 5272   | B2 |
| SERPINC1 462    | B2 |
| SERPIND1 3053   | B2 |
| SERPINE1 5054   | B2 |
| SERPINE2 5270   | B2 |
| SERPINE3 647174 | B2 |
| SERPINI1 5274   | B2 |
| SERPINI2 5276   | B2 |
| SERTAD1 29950   | B2 |
| SERTAD2 9792    | B2 |
| SERTAD3 29946   | B2 |
| SERTAD4 56256   | B2 |
| SESN2 83667     | B2 |
| SESN3 143686    | B2 |
| SESTD1 91404    | B2 |
| SETD1A 9739     | B2 |
| SETD1B 23067    | B2 |
| SETD2 29072     | B2 |
| SETD3 84193     | B2 |
| SETD4 54093     | B2 |
| SETD5 55209     | B2 |
| SETD6 79918     | B2 |
| SETD8 387893    | B2 |
| SEZ6L 23544     | B2 |
| SEZ6 124925     | B2 |
| SF3A2 8175      | B2 |
| SF3A3 10946     | B2 |
| SF3B1 23451     | B2 |
| SF3B2 10992     | B2 |
| SF3B3 23450     | B2 |
| SF3B5 83443     | B2 |
| SF4 57794       | B2 |
| SFI1 9814       | B2 |
| SFMBT1 51460    | B2 |
| SFMBT2 57713    | B2 |
| SFN 2810        | B2 |
| SFRP4 6424      | B2 |

|                  |    |
|------------------|----|
| SFRP5 6425       | B2 |
| SFRS11 9295      | B2 |
| SFRS12IP1 285672 | B2 |
| SFRS12 140890    | B2 |
| SFRS13A 10772    | B2 |
| SFRS13B 135295   | B2 |
| SFRS14 10147     | B2 |
| SFRS15 57466     | B2 |
| SFRS16 11129     | B2 |
| SFRS17A 8227     | B2 |
| SFRS2IP 9169     | B2 |
| SFRS3 6428       | B2 |
| SFRS6 6431       | B2 |
| SFRS7 6432       | B2 |
| SFRS8 6433       | B2 |
| SFT2D1 113402    | B2 |
| SFT2D2 375035    | B2 |
| SFT2D3 84826     | B2 |
| SFTA1P 207107    | B2 |
| SFTA2 389376     | B2 |
| SFTA3 253970     | B2 |
| SFTPA1 653509    | B2 |
| SFTPA2 729238    | B2 |
| SFTPB 6439       | B2 |
| SFTPC 6440       | B2 |
| SFTPD 6441       | B2 |
| SFXN3 81855      | B2 |
| SFXN4 119559     | B2 |
| SGCA 6442        | B2 |
| SGCD 6444        | B2 |
| SGCG 6445        | B2 |
| SGEF 26084       | B2 |
| SGIP1 84251      | B2 |
| SGK196 84197     | B2 |
| SGK223 157285    | B2 |
| SGK3 23678       | B2 |
| SGK494 124923    | B2 |
| SGMS1 259230     | B2 |
| SGMS2 166929     | B2 |
| SGPP1 81537      | B2 |
| SGPP2 130367     | B2 |
| SGSH 6448        | B2 |
| SGSM3 27352      | B2 |
| SGTA 6449        | B2 |
| SH2B1 25970      | B2 |
| SH2B2 10603      | B2 |
| SH2B3 10019      | B2 |
| SH2D1A 4068      | B2 |
| SH2D1B 117157    | B2 |
| SH2D3A 10045     | B2 |
| SH2D4B 387694    | B2 |

|                    |    |
|--------------------|----|
| SH2D5 400745       | B2 |
| SH2D6 284948       | B2 |
| SH2D7 646892       | B2 |
| SH3BGR 3 83442     | B2 |
| SH3BGR 6450        | B2 |
| SH3BP1 23616       | B2 |
| SH3BP4 23677       | B2 |
| SH3D20 201175      | B2 |
| SH3GL2 6456        | B2 |
| SH3GL3 6457        | B2 |
| SH3GLB2 56904      | B2 |
| SH3PXD2A 9644      | B2 |
| SH3PXD2B 285590    | B2 |
| SH3TC1 54436       | B2 |
| SH3YL1 26751       | B2 |
| SHANK1 50944       | B2 |
| SHANK2 22941       | B2 |
| SHB 6461           | B2 |
| SHC1 6464          | B2 |
| SHC2 25759         | B2 |
| SHC3 53358         | B2 |
| SHC4 399694        | B2 |
| SHD 56961          | B2 |
| SHF 90525          | B2 |
| SHH 6469           | B2 |
| SHISA2 387914      | B2 |
| SHISA4 149345      | B2 |
| SHISA6 388336      | B2 |
| SHISA7 729956      | B2 |
| SHOC2 8036         | B2 |
| SHPK 23729         | B2 |
| SHROOM1 134549     | B2 |
| SHROOM3 57619      | B2 |
| SIAE 54414         | B2 |
| SIAH1 6477         | B2 |
| SIAH3 283514       | B2 |
| SIGLEC10 89790     | B2 |
| SIGLEC11 114132    | B2 |
| SIGLEC12 89858     | B2 |
| SIGLEC14 100049587 | B2 |
| SIGLEC15 284266    | B2 |
| SIGLEC16 400709    | B2 |
| SIGLEC1 6614       | B2 |
| SIGLEC5 8778       | B2 |
| SIGLEC6 946        | B2 |
| SIGLEC7 27036      | B2 |
| SIGLEC8 27181      | B2 |
| SIGLEC9 27180      | B2 |
| SIGLECP3 284367    | B2 |
| SIGMAR1 10280      | B2 |
| SIK1 150094        | B2 |

|                |    |
|----------------|----|
| SIKE1 80143    | B2 |
| SIL1 64374     | B2 |
| SILV 6490      | B2 |
| SIM1 6492      | B2 |
| SIN3A 25942    | B2 |
| SIN3B 23309    | B2 |
| SIP1 8487      | B2 |
| SIPA1L1 26037  | B2 |
| SIPA1L2 57568  | B2 |
| SIPA1 6494     | B2 |
| SIRPB2 284759  | B2 |
| SIRPD 128646   | B2 |
| SIRPG 55423    | B2 |
| SIRT2 22933    | B2 |
| SIRT3 23410    | B2 |
| SIRT4 23409    | B2 |
| SIRT5 23408    | B2 |
| SIT1 27240     | B2 |
| SIVA1 10572    | B2 |
| SIX1 6495      | B2 |
| SIX2 10736     | B2 |
| SIX3 6496      | B2 |
| SIX5 147912    | B2 |
| SIX6 4990      | B2 |
| SKAP1 8631     | B2 |
| SKIV2L2 23517  | B2 |
| SKP1 6500      | B2 |
| SKP2 6502      | B2 |
| SLA2 84174     | B2 |
| SLAIN1 122060  | B2 |
| SLAIN2 57606   | B2 |
| SLAMF1 6504    | B2 |
| SLAMF6 114836  | B2 |
| SLAMF7 57823   | B2 |
| SLAMF9 89886   | B2 |
| SLA 6503       | B2 |
| SLC10A1 6554   | B2 |
| SLC10A2 6555   | B2 |
| SLC10A3 8273   | B2 |
| SLC10A4 201780 | B2 |
| SLC10A5 347051 | B2 |
| SLC10A7 84068  | B2 |
| SLC11A2 4891   | B2 |
| SLC12A1 6557   | B2 |
| SLC12A2 6558   | B2 |
| SLC12A3 6559   | B2 |
| SLC12A5 57468  | B2 |
| SLC12A9 56996  | B2 |
| SLC13A1 6561   | B2 |
| SLC13A2 9058   | B2 |
| SLC13A3 64849  | B2 |

|                 |    |
|-----------------|----|
| SLC13A4 26266   | B2 |
| SLC13A5 284111  | B2 |
| SLC14A1 6563    | B2 |
| SLC14A2 8170    | B2 |
| SLC15A1 6564    | B2 |
| SLC15A2 6565    | B2 |
| SLC15A3 51296   | B2 |
| SLC15A4 121260  | B2 |
| SLC16A10 117247 | B2 |
| SLC16A13 201232 | B2 |
| SLC16A14 151473 | B2 |
| SLC16A1 6566    | B2 |
| SLC16A4 9122    | B2 |
| SLC16A5 9121    | B2 |
| SLC16A6 9120    | B2 |
| SLC16A8 23539   | B2 |
| SLC16A9 220963  | B2 |
| SLC17A1 6568    | B2 |
| SLC17A3 10786   | B2 |
| SLC17A4 10050   | B2 |
| SLC17A5 26503   | B2 |
| SLC17A6 57084   | B2 |
| SLC17A8 246213  | B2 |
| SLC17A9 63910   | B2 |
| SLC18A1 6570    | B2 |
| SLC18A2 6571    | B2 |
| SLC18A3 6572    | B2 |
| SLC1A1 6505     | B2 |
| SLC1A2 6506     | B2 |
| SLC1A5 6510     | B2 |
| SLC1A6 6511     | B2 |
| SLC20A2 6575    | B2 |
| SLC22A10 387775 | B2 |
| SLC22A13 9390   | B2 |
| SLC22A14 9389   | B2 |
| SLC22A15 55356  | B2 |
| SLC22A16 85413  | B2 |
| SLC22A17 51310  | B2 |
| SLC22A18AS 5003 | B2 |
| SLC22A1 6580    | B2 |
| SLC22A20 440044 | B2 |
| SLC22A23 63027  | B2 |
| SLC22A24 283238 | B2 |
| SLC22A25 387601 | B2 |
| SLC22A2 6582    | B2 |
| SLC22A4 6583    | B2 |
| SLC22A5 6584    | B2 |
| SLC22A6 9356    | B2 |
| SLC22A7 10864   | B2 |
| SLC22A8 9376    | B2 |
| SLC22A9 114571  | B2 |

|                 |    |
|-----------------|----|
| SLC23A3 151295  | B2 |
| SLC24A1 9187    | B2 |
| SLC24A3 57419   | B2 |
| SLC24A4 123041  | B2 |
| SLC24A5 283652  | B2 |
| SLC24A6 80024   | B2 |
| SLC25A10 1468   | B2 |
| SLC25A11 8402   | B2 |
| SLC25A12 8604   | B2 |
| SLC25A13 10165  | B2 |
| SLC25A16 8034   | B2 |
| SLC25A18 83733  | B2 |
| SLC25A1 6576    | B2 |
| SLC25A21 89874  | B2 |
| SLC25A23 79085  | B2 |
| SLC25A29 123096 | B2 |
| SLC25A2 83884   | B2 |
| SLC25A31 83447  | B2 |
| SLC25A32 81034  | B2 |
| SLC25A33 84275  | B2 |
| SLC25A34 284723 | B2 |
| SLC25A35 399512 | B2 |
| SLC25A37 51312  | B2 |
| SLC25A38 54977  | B2 |
| SLC25A3 5250    | B2 |
| SLC25A40 55972  | B2 |
| SLC25A41 284427 | B2 |
| SLC25A43 203427 | B2 |
| SLC25A45 283130 | B2 |
| SLC25A46 91137  | B2 |
| SLC25A4 291     | B2 |
| SLC25A6 293     | B2 |
| SLC26A11 284129 | B2 |
| SLC26A1 10861   | B2 |
| SLC26A2 1836    | B2 |
| SLC26A3 1811    | B2 |
| SLC26A5 375611  | B2 |
| SLC26A6 65010   | B2 |
| SLC26A7 115111  | B2 |
| SLC26A8 116369  | B2 |
| SLC26A9 115019  | B2 |
| SLC27A2 11001   | B2 |
| SLC27A3 11000   | B2 |
| SLC27A5 10998   | B2 |
| SLC28A1 9154    | B2 |
| SLC28A2 9153    | B2 |
| SLC28A3 64078   | B2 |
| SLC29A2 3177    | B2 |
| SLC2A11 66035   | B2 |
| SLC2A13 114134  | B2 |
| SLC2A14 144195  | B2 |



|                 |    |
|-----------------|----|
| SLC2A2 6514     | B2 |
| SLC2A3 6515     | B2 |
| SLC2A4RG 56731  | B2 |
| SLC2A5 6518     | B2 |
| SLC2A7 155184   | B2 |
| SLC2A8 29988    | B2 |
| SLC2A9 56606    | B2 |
| SLC30A10 55532  | B2 |
| SLC30A2 7780    | B2 |
| SLC30A3 7781    | B2 |
| SLC30A4 7782    | B2 |
| SLC30A5 64924   | B2 |
| SLC30A6 55676   | B2 |
| SLC30A8 169026  | B2 |
| SLC30A9 10463   | B2 |
| SLC31A1 1317    | B2 |
| SLC31A2 1318    | B2 |
| SLC32A1 140679  | B2 |
| SLC33A1 9197    | B2 |
| SLC34A1 6569    | B2 |
| SLC34A2 10568   | B2 |
| SLC34A3 142680  | B2 |
| SLC35A1 10559   | B2 |
| SLC35A4 113829  | B2 |
| SLC35A5 55032   | B2 |
| SLC35B3 51000   | B2 |
| SLC35C1 55343   | B2 |
| SLC35C2 51006   | B2 |
| SLC35D2 11046   | B2 |
| SLC35D3 340146  | B2 |
| SLC35E1 79939   | B2 |
| SLC35E2 728661  | B2 |
| SLC35E2 9906    | B2 |
| SLC35E4 339665  | B2 |
| SLC35F1 222553  | B2 |
| SLC35F2 54733   | B2 |
| SLC35F3 148641  | B2 |
| SLC35F4 341880  | B2 |
| SLC36A1 206358  | B2 |
| SLC36A2 153201  | B2 |
| SLC36A3 285641  | B2 |
| SLC36A4 120103  | B2 |
| SLC37A2 219855  | B2 |
| SLC37A3 84255   | B2 |
| SLC37A4 2542    | B2 |
| SLC38A10 124565 | B2 |
| SLC38A11 151258 | B2 |
| SLC38A1 81539   | B2 |
| SLC38A2 54407   | B2 |
| SLC38A3 10991   | B2 |
| SLC38A4 55089   | B2 |

|                 |    |
|-----------------|----|
| SLC38A6 145389  | B2 |
| SLC38A8 146167  | B2 |
| SLC38A9 153129  | B2 |
| SLC39A12 221074 | B2 |
| SLC39A13 91252  | B2 |
| SLC39A14 23516  | B2 |
| SLC39A2 29986   | B2 |
| SLC39A5 283375  | B2 |
| SLC39A6 25800   | B2 |
| SLC39A8 64116   | B2 |
| SLC3A1 6519     | B2 |
| SLC3A2 6520     | B2 |
| SLC40A1 30061   | B2 |
| SLC41A1 254428  | B2 |
| SLC41A2 84102   | B2 |
| SLC43A1 8501    | B2 |
| SLC43A2 124935  | B2 |
| SLC43A3 29015   | B2 |
| SLC44A2 57153   | B2 |
| SLC44A3 126969  | B2 |
| SLC44A5 204962  | B2 |
| SLC45A1 50651   | B2 |
| SLC45A2 51151   | B2 |
| SLC45A3 85414   | B2 |
| SLC45A4 57210   | B2 |
| SLC46A1 113235  | B2 |
| SLC46A2 57864   | B2 |
| SLC46A3 283537  | B2 |
| SLC47A1 55244   | B2 |
| SLC4A10 57282   | B2 |
| SLC4A11 83959   | B2 |
| SLC4A1AP 22950  | B2 |
| SLC4A1 6521     | B2 |
| SLC4A3 6508     | B2 |
| SLC4A4 8671     | B2 |
| SLC4A7 9497     | B2 |
| SLC4A9 83697    | B2 |
| SLC5A10 125206  | B2 |
| SLC5A11 115584  | B2 |
| SLC5A12 159963  | B2 |
| SLC5A1 6523     | B2 |
| SLC5A2 6524     | B2 |
| SLC5A3 6526     | B2 |
| SLC5A5 6528     | B2 |
| SLC5A6 8884     | B2 |
| SLC5A7 60482    | B2 |
| SLC5A8 160728   | B2 |
| SLC6A10P 386757 | B2 |
| SLC6A11 6538    | B2 |
| SLC6A12 6539    | B2 |
| SLC6A13 6540    | B2 |

|                 |    |
|-----------------|----|
| SLC6A14 11254   | B2 |
| SLC6A15 55117   | B2 |
| SLC6A17 388662  | B2 |
| SLC6A18 348932  | B2 |
| SLC6A19 340024  | B2 |
| SLC6A20 54716   | B2 |
| SLC6A2 6530     | B2 |
| SLC6A3 6531     | B2 |
| SLC6A4 6532     | B2 |
| SLC6A6 6533     | B2 |
| SLC6A7 6534     | B2 |
| SLC6A8 6535     | B2 |
| SLC7A13 157724  | B2 |
| SLC7A1 6541     | B2 |
| SLC7A2 6542     | B2 |
| SLC7A4 6545     | B2 |
| SLC7A5P1 81893  | B2 |
| SLC7A5P2 387254 | B2 |
| SLC7A5 8140     | B2 |
| SLC7A6OS 84138  | B2 |
| SLC7A6 9057     | B2 |
| SLC7A7 9056     | B2 |
| SLC7A9 11136    | B2 |
| SLC8A1 6546     | B2 |
| SLC8A2 6543     | B2 |
| SLC8A3 6547     | B2 |
| SLC9A10 285335  | B2 |
| SLC9A11 284525  | B2 |
| SLC9A1 6548     | B2 |
| SLC9A2 6549     | B2 |
| SLC9A3R2 9351   | B2 |
| SLC9A3 6550     | B2 |
| SLC9A4 389015   | B2 |
| SLC9A5 6553     | B2 |
| SLC9A7 84679    | B2 |
| SLC9A8 23315    | B2 |
| SLCO1B1 10599   | B2 |
| SLCO1B3 28234   | B2 |
| SLCO2A1 6578    | B2 |
| SLCO2B1 11309   | B2 |
| SLCO3A1 28232   | B2 |
| SLCO4A1 28231   | B2 |
| SLCO4C1 353189  | B2 |
| SLCO5A1 81796   | B2 |
| SLCO6A1 133482  | B2 |
| SLED1 643036    | B2 |
| SLFN11 91607    | B2 |
| SLFN12L 342615  | B2 |
| SLFN12 55106    | B2 |
| SLFN13 146857   | B2 |
| SLFN14 342618   | B2 |

|                |    |
|----------------|----|
| SLFN5 162394   | B2 |
| SLFNL1 200172  | B2 |
| SLIT1 6585     | B2 |
| SLITRK1 114798 | B2 |
| SLITRK3 22865  | B2 |
| SLITRK4 139065 | B2 |
| SLITRK5 26050  | B2 |
| SLITRK6 84189  | B2 |
| SLK 9748       | B2 |
| SLMAP 7871     | B2 |
| SLMO1 10650    | B2 |
| SLN 6588       | B2 |
| SLPI 6590      | B2 |
| SLTM 79811     | B2 |
| SLURP1 57152   | B2 |
| SMAD1 4086     | B2 |
| SMAD2 4087     | B2 |
| SMAD5 4090     | B2 |
| SMAD7 4092     | B2 |
| SMAGP 57228    | B2 |
| SMAP1 60682    | B2 |
| SMAP2 64744    | B2 |
| SMARCA1 6594   | B2 |
| SMARCA5 8467   | B2 |
| SMARCAD1 56916 | B2 |
| SMARCAL1 50485 | B2 |
| SMARCD1 6602   | B2 |
| SMARCD2 6603   | B2 |
| SMARCD3 6604   | B2 |
| SMARCE1 6605   | B2 |
| SMC1B 27127    | B2 |
| SMC3 9126      | B2 |
| SMC5 23137     | B2 |
| SMCHD1 23347   | B2 |
| SMCR5 140771   | B2 |
| SMCR7L 54471   | B2 |
| SMCR7 125170   | B2 |
| SMCR8 140775   | B2 |
| SMEK1 55671    | B2 |
| SMEK2 57223    | B2 |
| SMEK3P 139420  | B2 |
| SMG1 23049     | B2 |
| SMN1 6606      | B2 |
| SMN2 6607      | B2 |
| SMNDC1 10285   | B2 |
| SMOC2 64094    | B2 |
| SMOX 54498     | B2 |
| SMO 6608       | B2 |
| SMPD1 6609     | B2 |
| SMPD3 55512    | B2 |
| SMPDL3A 10924  | B2 |

|                   |    |
|-------------------|----|
| SMPDL3B 27293     | B2 |
| SMPX 23676        | B2 |
| SMR3A 26952       | B2 |
| SMR3B 10879       | B2 |
| SMTNL1 219537     | B2 |
| SMTNL2 342527     | B2 |
| SMU1 55234        | B2 |
| SMURF1 57154      | B2 |
| SMURF2 64750      | B2 |
| SMYD1 150572      | B2 |
| SMYD2 56950       | B2 |
| SMYD5 10322       | B2 |
| SNAI1 6615        | B2 |
| SNAI3 333929      | B2 |
| SNAP23 8773       | B2 |
| SNAP25 6616       | B2 |
| SNAP29 9342       | B2 |
| SNAP91 9892       | B2 |
| SNAPC1 6617       | B2 |
| SNAPC3 6619       | B2 |
| SNAPC4 6621       | B2 |
| SNAPC5 10302      | B2 |
| SNAPIN 23557      | B2 |
| SNCAIP 9627       | B2 |
| SNCB 6620         | B2 |
| SND1 27044        | B2 |
| SNF8 11267        | B2 |
| SNHG10 283596     | B2 |
| SNHG11 128439     | B2 |
| SNHG12 85028      | B2 |
| SNHG1 23642       | B2 |
| SNHG3-RCC1 751867 | B2 |
| SNHG3 8420        | B2 |
| SNHG4 724102      | B2 |
| SNHG6 641638      | B2 |
| SNHG7 84973       | B2 |
| SNHG9 735301      | B2 |
| SNIP1 79753       | B2 |
| SNORA10 574042    | B2 |
| SNORA11 677799    | B2 |
| SNORA12 677800    | B2 |
| SNORA14A 677801   | B2 |
| SNORA14B 677802   | B2 |
| SNORA15 677803    | B2 |
| SNORA16A 692073   | B2 |
| SNORA16B 692157   | B2 |
| SNORA18 677805    | B2 |
| SNORA1 677792     | B2 |
| SNORA20 677806    | B2 |
| SNORA21 619505    | B2 |
| SNORA22 677807    | B2 |

|                    |    |
|--------------------|----|
| SNORA23 677808     | B2 |
| SNORA24 677809     | B2 |
| SNORA25 684959     | B2 |
| SNORA26 677810     | B2 |
| SNORA27 619499     | B2 |
| SNORA29 677812     | B2 |
| SNORA2A 677793     | B2 |
| SNORA2B 677794     | B2 |
| SNORA31 677814     | B2 |
| SNORA34 677815     | B2 |
| SNORA37 677819     | B2 |
| SNORA38B 100124536 | B2 |
| SNORA38 677820     | B2 |
| SNORA39 677821     | B2 |
| SNORA3 619562      | B2 |
| SNORA40 677822     | B2 |
| SNORA41 619569     | B2 |
| SNORA44 677825     | B2 |
| SNORA45 677826     | B2 |
| SNORA46 677827     | B2 |
| SNORA47 677828     | B2 |
| SNORA48 652965     | B2 |
| SNORA49 677829     | B2 |
| SNORA4 619568      | B2 |
| SNORA50 677830     | B2 |
| SNORA52 619565     | B2 |
| SNORA53 677832     | B2 |
| SNORA54 677833     | B2 |
| SNORA55 677834     | B2 |
| SNORA56 677835     | B2 |
| SNORA57 692158     | B2 |
| SNORA59B 677882    | B2 |
| SNORA5A 654319     | B2 |
| SNORA5B 677795     | B2 |
| SNORA5C 677796     | B2 |
| SNORA61 677838     | B2 |
| SNORA62 6044       | B2 |
| SNORA63 6043       | B2 |
| SNORA64 26784      | B2 |
| SNORA65 26783      | B2 |
| SNORA67 26781      | B2 |
| SNORA68 26780      | B2 |
| SNORA6 574040      | B2 |
| SNORA70 26778      | B2 |
| SNORA71A 26777     | B2 |
| SNORA71B 26776     | B2 |
| SNORA71D 677840    | B2 |
| SNORA72 26775      | B2 |
| SNORA74A 26821     | B2 |
| SNORA74B 677841    | B2 |
| SNORA75 654321     | B2 |

|                       |    |
|-----------------------|----|
| SNORA76 677842        | B2 |
| SNORA7B 677797        | B2 |
| SNORA80 677846        | B2 |
| SNORA81 677847        | B2 |
| SNORA84 100124534     | B2 |
| SNORA8 654320         | B2 |
| SNORA9 677798         | B2 |
| SNORD10 652966        | B2 |
| SNORD115-26 100033802 | B2 |
| SNORD116-28 100033820 | B2 |
| SNORD15A 6079         | B2 |
| SNORD15B 114599       | B2 |
| SNORD17 692086        | B2 |
| SNORD1C 677850        | B2 |
| SNORD22 9304          | B2 |
| SNORD94 692225        | B2 |
| SNORD97 692223        | B2 |
| SNPH 9751             | B2 |
| SNRNP200 23020        | B2 |
| SNRNP27 11017         | B2 |
| SNRNP35 11066         | B2 |
| SNRNP48 154007        | B2 |
| SNRNP70 6625          | B2 |
| SNRPA 6626            | B2 |
| SNRPD2 6633           | B2 |
| SNRPN 6638            | B2 |
| SNTA1 6640            | B2 |
| SNTG1 54212           | B2 |
| SNTN 132203           | B2 |
| SNUPN 10073           | B2 |
| SNURF 8926            | B2 |
| SNW1 22938            | B2 |
| SNX10 29887           | B2 |
| SNX11 29916           | B2 |
| SNX12 29934           | B2 |
| SNX13 23161           | B2 |
| SNX14 57231           | B2 |
| SNX16 64089           | B2 |
| SNX17 9784            | B2 |
| SNX19 399979          | B2 |
| SNX20 124460          | B2 |
| SNX22 79856           | B2 |
| SNX25 83891           | B2 |
| SNX2 6643             | B2 |
| SNX30 401548          | B2 |
| SNX31 169166          | B2 |
| SNX32 254122          | B2 |
| SNX3 8724             | B2 |
| SNX4 8723             | B2 |
| SNX5 27131            | B2 |
| SNX6 58533            | B2 |

|                |    |
|----------------|----|
| SNX7 51375     | B2 |
| SNX8 29886     | B2 |
| SNX9 51429     | B2 |
| SOAT1 6646     | B2 |
| SOAT2 8435     | B2 |
| SOCS1 8651     | B2 |
| SOCS4 122809   | B2 |
| SOCS6 9306     | B2 |
| SOCS7 30837    | B2 |
| SOD1 6647      | B2 |
| SOHLH1 402381  | B2 |
| SOHLH2 54937   | B2 |
| SON 6651       | B2 |
| SORCS1 114815  | B2 |
| SORCS2 57537   | B2 |
| SORCS3 22986   | B2 |
| SORL1 6653     | B2 |
| SORT1 6272     | B2 |
| SOST 50964     | B2 |
| SOX11 6664     | B2 |
| SOX13 9580     | B2 |
| SOX14 8403     | B2 |
| SOX15 6665     | B2 |
| SOX18 54345    | B2 |
| SOX1 6656      | B2 |
| SOX21 11166    | B2 |
| SOX20T 347689  | B2 |
| SOX2 6657      | B2 |
| SOX30 11063    | B2 |
| SOX3 6658      | B2 |
| SOX6 55553     | B2 |
| SOX8 30812     | B2 |
| SOX9 6662      | B2 |
| SP100 6672     | B2 |
| SP140L 93349   | B2 |
| SP140 11262    | B2 |
| SP1 6667       | B2 |
| SP2 6668       | B2 |
| SP3 6670       | B2 |
| SP4 6671       | B2 |
| SP5 389058     | B2 |
| SP6 80320      | B2 |
| SP7 121340     | B2 |
| SP8 221833     | B2 |
| SP9 100131390  | B2 |
| SPACA3 124912  | B2 |
| SPACA4 171169  | B2 |
| SPACA5 389852  | B2 |
| SPAG11A 653423 | B2 |
| SPAG16 79582   | B2 |
| SPAG17 200162  | B2 |



|                   |    |
|-------------------|----|
| SPAG4 6676        | B2 |
| SPAG6 9576        | B2 |
| SPAG7 9552        | B2 |
| SPAG8 26206       | B2 |
| SPAG9 9043        | B2 |
| SPAM1 6677        | B2 |
| SPANXA2 728712    | B2 |
| SPANXB2 100133171 | B2 |
| SPANXC 64663      | B2 |
| SPANXE 171489     | B2 |
| SPANXN3 139067    | B2 |
| SPARC 6678        | B2 |
| SPAST 6683        | B2 |
| SPATA12 353324    | B2 |
| SPATA13 221178    | B2 |
| SPATA16 83893     | B2 |
| SPATA1 64173      | B2 |
| SPATA20 64847     | B2 |
| SPATA21 374955    | B2 |
| SPATA22 84690     | B2 |
| SPATA24 202051    | B2 |
| SPATA2L 124044    | B2 |
| SPATA2 9825       | B2 |
| SPATA3 130560     | B2 |
| SPATA4 132851     | B2 |
| SPATA5L1 79029    | B2 |
| SPATA5 166378     | B2 |
| SPATA6 54558      | B2 |
| SPATA8 145946     | B2 |
| SPATC1 375686     | B2 |
| SPATS1 221409     | B2 |
| SPATS2L 26010     | B2 |
| SPCS3 60559       | B2 |
| SPDYA 245711      | B2 |
| SPDYC 387778      | B2 |
| SPDYE1 285955     | B2 |
| SPDYE2 441273     | B2 |
| SPDYE3 441272     | B2 |
| SPDYE4 388333     | B2 |
| SPDYE5 442590     | B2 |
| SPDYE6 729597     | B2 |
| SPDYE7P 441251    | B2 |
| SPDYE8P 389517    | B2 |
| SPEF2 79925       | B2 |
| SPEG 10290        | B2 |
| SPEM1 374768      | B2 |
| SPERT 220082      | B2 |
| SPESP1 246777     | B2 |
| SPG11 80208       | B2 |
| SPG21 51324       | B2 |
| SPG7 6687         | B2 |

|                |    |
|----------------|----|
| SPHAR 10638    | B2 |
| SPHK1 8877     | B2 |
| SPHK2 56848    | B2 |
| SPI1 6688      | B2 |
| SPIB 6689      | B2 |
| SPIC 121599    | B2 |
| SPIN1 10927    | B2 |
| SPIN2B 474343  | B2 |
| SPIN3 169981   | B2 |
| SPIN4 139886   | B2 |
| SPINK13 153218 | B2 |
| SPINK1 6690    | B2 |
| SPINK2 6691    | B2 |
| SPINK4 27290   | B2 |
| SPINK5 11005   | B2 |
| SPINK6 404203  | B2 |
| SPINK7 84651   | B2 |
| SPINK8 646424  | B2 |
| SPINK9 643394  | B2 |
| SPINLW1 57119  | B2 |
| SPINT3 10816   | B2 |
| SPIRE1 56907   | B2 |
| SPNS3 201305   | B2 |
| SPN 6693       | B2 |
| SPOCK1 6695    | B2 |
| SPOCK2 9806    | B2 |
| SPOCK3 50859   | B2 |
| SPON1 10418    | B2 |
| SPON2 10417    | B2 |
| SPOP 8405      | B2 |
| SPP2 6694      | B2 |
| SPPL2A 84888   | B2 |
| SPPL2B 56928   | B2 |
| SPPL3 121665   | B2 |
| SPRED1 161742  | B2 |
| SPRED2 200734  | B2 |
| SPRED3 399473  | B2 |
| SPRN 503542    | B2 |
| SPRR1A 6698    | B2 |
| SPRR1B 6699    | B2 |
| SPRR2A 6700    | B2 |
| SPRR2B 6701    | B2 |
| SPRR2C 6702    | B2 |
| SPRR2D 6703    | B2 |
| SPRR2E 6704    | B2 |
| SPRR2F 6705    | B2 |
| SPRR2G 6706    | B2 |
| SPRR3 6707     | B2 |
| SPRR4 163778   | B2 |
| SPRY3 10251    | B2 |
| SPRY4 81848    | B2 |

|                 |    |
|-----------------|----|
| SPRYD3 84926    | B2 |
| SPRYD4 283377   | B2 |
| SPRYD5 84767    | B2 |
| SPSB1 80176     | B2 |
| SPSB2 84727     | B2 |
| SPSB3 90864     | B2 |
| SPSB4 92369     | B2 |
| SPTA1 6708      | B2 |
| SPTAN1 6709     | B2 |
| SPTBN2 6712     | B2 |
| SPTBN4 57731    | B2 |
| SPTBN5 51332    | B2 |
| SPTB 6710       | B2 |
| SPTLC1 10558    | B2 |
| SPTLC2 9517     | B2 |
| SPTLC3 55304    | B2 |
| SPTY2D1 144108  | B2 |
| SPZ1 84654      | B2 |
| SQSTM1 8878     | B2 |
| SR140 23350     | B2 |
| SRBD1 55133     | B2 |
| SRCIN1 80725    | B2 |
| SRCRB4D 136853  | B2 |
| SRD5A1 6715     | B2 |
| SRD5A2 6716     | B2 |
| SREBF2 6721     | B2 |
| SRFBP1 153443   | B2 |
| SRGAP1 57522    | B2 |
| SRGAP3 9901     | B2 |
| SRGN 5552       | B2 |
| SRI 6717        | B2 |
| SRL 6345        | B2 |
| SRM 6723        | B2 |
| SRP14 6727      | B2 |
| SRP68 6730      | B2 |
| SRPK3 26576     | B2 |
| SRPR 6734       | B2 |
| SRPX2 27286     | B2 |
| SRRD 402055     | B2 |
| SRRM1 10250     | B2 |
| SRRM2 23524     | B2 |
| SRRM3 222183    | B2 |
| SRRM4 84530     | B2 |
| SRRM5 100170229 | B2 |
| SRR 63826       | B2 |
| SS18L1 26039    | B2 |
| SS18L2 51188    | B2 |
| SS18 6760       | B2 |
| SSBP3 23648     | B2 |
| SSBP4 170463    | B2 |
| SSB 6741        | B2 |

|                  |    |
|------------------|----|
| SSC5D 284297     | B2 |
| SSFA2 6744       | B2 |
| SSH1 54434       | B2 |
| SSH2 85464       | B2 |
| SSH3 54961       | B2 |
| SSPO 23145       | B2 |
| SSR3 6747        | B2 |
| SSRP1 6749       | B2 |
| SSSCA1 10534     | B2 |
| SSTR2 6752       | B2 |
| SSTR3 6753       | B2 |
| SSTR5 6755       | B2 |
| SST 6750         | B2 |
| SSU72 29101      | B2 |
| SSX1 6756        | B2 |
| SSX2 6757        | B2 |
| SSX3 10214       | B2 |
| SSX4 6759        | B2 |
| SSX5 6758        | B2 |
| SSX6 280657      | B2 |
| ST18 9705        | B2 |
| ST3GAL1 6482     | B2 |
| ST3GAL2 6483     | B2 |
| ST3GAL4 6484     | B2 |
| ST3GAL5 8869     | B2 |
| ST3GAL6 10402    | B2 |
| ST6GAL1 6480     | B2 |
| ST6GALNAC1 55808 | B2 |
| ST6GALNAC2 10610 | B2 |
| ST6GALNAC4 27090 | B2 |
| ST6GALNAC5 81849 | B2 |
| ST7L 54879       | B2 |
| ST7OT2 93654     | B2 |
| ST7OT3 93655     | B2 |
| ST7OT4 338069    | B2 |
| ST7 7982         | B2 |
| ST8SIA1 6489     | B2 |
| ST8SIA3 51046    | B2 |
| ST8SIA4 7903     | B2 |
| ST8SIA5 29906    | B2 |
| ST8SIA6 338596   | B2 |
| STAC3 246329     | B2 |
| STAC 6769        | B2 |
| STAG1 10274      | B2 |
| STAG2 10735      | B2 |
| STAG3L1 54441    | B2 |
| STAG3L2 442582   | B2 |
| STAG3L4 64940    | B2 |
| STAG3 10734      | B2 |
| STAM2 10254      | B2 |
| STAMBPL1 57559   | B2 |

|                      |    |
|----------------------|----|
| STAP1 26228          | B2 |
| STAP2 55620          | B2 |
| STARD3NL 83930       | B2 |
| STARD3 10948         | B2 |
| STARD4 134429        | B2 |
| STARD5 80765         | B2 |
| STARD6 147323        | B2 |
| STARD7 56910         | B2 |
| STAR 6770            | B2 |
| STAT2 6773           | B2 |
| STAT3 6774           | B2 |
| STAT4 6775           | B2 |
| STATH 6779           | B2 |
| STAU2 27067          | B2 |
| STC1 6781            | B2 |
| STC2 8614            | B2 |
| STEAP1 26872         | B2 |
| STEAP2 261729        | B2 |
| STEAP3 55240         | B2 |
| STEAP4 79689         | B2 |
| STH 246744           | B2 |
| STK10 6793           | B2 |
| STK11 6794           | B2 |
| STK16 8576           | B2 |
| STK17A 9263          | B2 |
| STK17B 9262          | B2 |
| STK19 8859           | B2 |
| STK24 8428           | B2 |
| STK25 10494          | B2 |
| STK31 56164          | B2 |
| STK32B 55351         | B2 |
| STK32C 282974        | B2 |
| STK33 65975          | B2 |
| STK35 140901         | B2 |
| STK36 27148          | B2 |
| STK38L 23012         | B2 |
| STK38 11329          | B2 |
| STK39 27347          | B2 |
| STK3 6788            | B2 |
| STK4 6789            | B2 |
| STMN2 11075          | B2 |
| STMN3 50861          | B2 |
| STMN4 81551          | B2 |
| STOML1 9399          | B2 |
| STOML2 30968         | B2 |
| STOML3 161003        | B2 |
| STOM 2040            | B2 |
| STON1-GTF2A1L 286749 | B2 |
| STON2 85439          | B2 |
| STOX1 219736         | B2 |
| STRA6 64220          | B2 |

|                |    |
|----------------|----|
| STRA8 346673   | B2 |
| STRADA 92335   | B2 |
| STRADB 55437   | B2 |
| STRAP 11171    | B2 |
| STRC 161497    | B2 |
| STRN3 29966    | B2 |
| STRN4 29888    | B2 |
| STRN 6801      | B2 |
| STS 412        | B2 |
| STT3B 201595   | B2 |
| STUB1 10273    | B2 |
| STX10 8677     | B2 |
| STX16 8675     | B2 |
| STX17 55014    | B2 |
| STX18 53407    | B2 |
| STX19 415117   | B2 |
| STX1B 112755   | B2 |
| STX4 6810      | B2 |
| STX5 6811      | B2 |
| STXBP3 6814    | B2 |
| STXBP4 252983  | B2 |
| STXBP5L 9515   | B2 |
| STXBP5 134957  | B2 |
| STYK1 55359    | B2 |
| STYX 6815      | B2 |
| SUB1 10923     | B2 |
| SUCLG2 8801    | B2 |
| SUCNR1 56670   | B2 |
| SUDS3 64426    | B2 |
| SUFU 51684     | B2 |
| SUGT1 10910    | B2 |
| SULT1A1 6817   | B2 |
| SULT1A2 6799   | B2 |
| SULT1A3 6818   | B2 |
| SULT1B1 27284  | B2 |
| SULT1C2 6819   | B2 |
| SULT1C3 442038 | B2 |
| SULT1E1 6783   | B2 |
| SULT2A1 6822   | B2 |
| SULT2B1 6820   | B2 |
| SULT4A1 25830  | B2 |
| SULT6B1 391365 | B2 |
| SUMF1 285362   | B2 |
| SUMF2 25870    | B2 |
| SUMO1P1 391257 | B2 |
| SUMO4 387082   | B2 |
| SUN3 256979    | B2 |
| SUOX 6821      | B2 |
| SUPT4H1 6827   | B2 |
| SUPT5H 6829    | B2 |
| SUPT6H 6830    | B2 |

|                    |    |
|--------------------|----|
| SUPT7L 9913        | B2 |
| SUPV3L1 6832       | B2 |
| SURF1 6834         | B2 |
| SURF2 6835         | B2 |
| SURF4 6836         | B2 |
| SURF6 6838         | B2 |
| SUSD1 64420        | B2 |
| SUSD2 56241        | B2 |
| SUSD4 55061        | B2 |
| SUSD5 26032        | B2 |
| SUV420H1 51111     | B2 |
| SUZ12P 440423      | B2 |
| SUZ12 23512        | B2 |
| SV2A 9900          | B2 |
| SV2C 22987         | B2 |
| SVIL 6840          | B2 |
| SVOPL 136306       | B2 |
| SVOP 55530         | B2 |
| SYBU 55638         | B2 |
| SYCE1L 100130958   | B2 |
| SYCE1 93426        | B2 |
| SYCN 342898        | B2 |
| SYCP1 6847         | B2 |
| SYCP2L 221711      | B2 |
| SYCP2 10388        | B2 |
| SYCP3 50511        | B2 |
| SYDE2 84144        | B2 |
| SYK 6850           | B2 |
| SYMPK 8189         | B2 |
| SYN1 6853          | B2 |
| SYN3 8224          | B2 |
| SYNCRIP 10492      | B2 |
| SYNC 81493         | B2 |
| SYNGAP1 8831       | B2 |
| SYNGR1 9145        | B2 |
| SYNJ1 8867         | B2 |
| SYNJ2BP 55333      | B2 |
| SYNJ2 8871         | B2 |
| SYNPO2L 79933      | B2 |
| SYNPR 132204       | B2 |
| SYNRG 11276        | B2 |
| SYPL1 6856         | B2 |
| SYPL2 284612       | B2 |
| SYP 6855           | B2 |
| SYS1-DBNDD2 767557 | B2 |
| SYS1 90196         | B2 |
| SYT10 341359       | B2 |
| SYT11 23208        | B2 |
| SYT12 91683        | B2 |
| SYT13 57586        | B2 |
| SYT14L 401135      | B2 |

|              |    |
|--------------|----|
| SYT14 255928 | B2 |
| SYT16 83851  | B2 |
| SYT17 51760  | B2 |
| SYT1 6857    | B2 |
| SYT3 84258   | B2 |
| SYT4 6860    | B2 |
| SYT5 6861    | B2 |
| SYT6 148281  | B2 |
| SYT7 9066    | B2 |
| SYT9 143425  | B2 |
| SYTL1 84958  | B2 |
| SYTL2 54843  | B2 |
| SYTL4 94121  | B2 |
| SYTL5 94122  | B2 |
| SYVN1 84447  | B2 |
| TAAR1 134864 | B2 |
| TAB1 10454   | B2 |
| TAB2 23118   | B2 |
| TAB3 257397  | B2 |
| TAC3 6866    | B2 |
| TAC4 255061  | B2 |
| TACC2 10579  | B2 |
| TACR2 6865   | B2 |
| TACR3 6870   | B2 |
| TACSTD2 4070 | B2 |
| TADA2A 6871  | B2 |
| TADA2B 93624 | B2 |
| TADA3 10474  | B2 |
| TAF10 6881   | B2 |
| TAF13 6884   | B2 |
| TAF15 8148   | B2 |
| TAF1A 9015   | B2 |
| TAF1B 9014   | B2 |
| TAF1D 79101  | B2 |
| TAF1L 138474 | B2 |
| TAF1 6872    | B2 |
| TAF3 83860   | B2 |
| TAF4B 6875   | B2 |
| TAF5 6877    | B2 |
| TAF6L 10629  | B2 |
| TAF7L 54457  | B2 |
| TAF7 6879    | B2 |
| TAF9B 51616  | B2 |
| TAF9 6880    | B2 |
| TAGAP 117289 | B2 |
| TAGLN3 29114 | B2 |
| TAL2 6887    | B2 |
| TALDO1 6888  | B2 |
| TANC1 85461  | B2 |
| TAOK1 57551  | B2 |
| TAOK2 9344   | B2 |



|                 |    |
|-----------------|----|
| TAOK3 51347     | B2 |
| TAP2 6891       | B2 |
| TAPBPL 55080    | B2 |
| TAPT1 202018    | B2 |
| TARBP1 6894     | B2 |
| TARP 445347     | B2 |
| TARSL2 123283   | B2 |
| TAS1R1 80835    | B2 |
| TAS1R2 80834    | B2 |
| TAS1R3 83756    | B2 |
| TAS2R10 50839   | B2 |
| TAS2R13 50838   | B2 |
| TAS2R14 50840   | B2 |
| TAS2R19 259294  | B2 |
| TAS2R1 50834    | B2 |
| TAS2R20 259295  | B2 |
| TAS2R30 259293  | B2 |
| TAS2R31 259290  | B2 |
| TAS2R38 5726    | B2 |
| TAS2R39 259285  | B2 |
| TAS2R3 50831    | B2 |
| TAS2R40 259286  | B2 |
| TAS2R42 353164  | B2 |
| TAS2R43 259289  | B2 |
| TAS2R46 259292  | B2 |
| TAS2R4 50832    | B2 |
| TAS2R50 259296  | B2 |
| TAS2R60 338398  | B2 |
| TAS2R7 50837    | B2 |
| TAS2R8 50836    | B2 |
| TAS2R9 50835    | B2 |
| TASP1 55617     | B2 |
| TATDN1 83940    | B2 |
| TATDN2 9797     | B2 |
| TATDN3 128387   | B2 |
| TAT 6898        | B2 |
| TAX1BP3 30851   | B2 |
| TAZ 6901        | B2 |
| TBC1D10A 83874  | B2 |
| TBC1D10C 374403 | B2 |
| TBC1D12 23232   | B2 |
| TBC1D16 125058  | B2 |
| TBC1D19 55296   | B2 |
| TBC1D1 23216    | B2 |
| TBC1D20 128637  | B2 |
| TBC1D22A 25771  | B2 |
| TBC1D22B 55633  | B2 |
| TBC1D23 55773   | B2 |
| TBC1D24 57465   | B2 |
| TBC1D26 353149  | B2 |
| TBC1D28 254272  | B2 |

|                 |    |
|-----------------|----|
| TBC1D29 26083   | B2 |
| TBC1D2 55357    | B2 |
| TBC1D3B 414059  | B2 |
| TBC1D3C 414060  | B2 |
| TBC1D3G 654341  | B2 |
| TBC1D3H 729877  | B2 |
| TBC1D3P2 440452 | B2 |
| TBC1D3 729873   | B2 |
| TBC1D8B 54885   | B2 |
| TBC1D8 11138    | B2 |
| TBC1D9B 23061   | B2 |
| TBCCD1 55171    | B2 |
| TBCC 6903       | B2 |
| TBCD 6904       | B2 |
| TBCEL 219899    | B2 |
| TBCK 93627      | B2 |
| TBK1 29110      | B2 |
| TBL1X 6907      | B2 |
| TBL1Y 90665     | B2 |
| TBPL1 9519      | B2 |
| TBPL2 387332    | B2 |
| TBP 6908        | B2 |
| TBR1 10716      | B2 |
| TBX10 347853    | B2 |
| TBX19 9095      | B2 |
| TBX1 6899       | B2 |
| TBX20 57057     | B2 |
| TBX21 30009     | B2 |
| TBX22 50945     | B2 |
| TBX2 6909       | B2 |
| TBX3 6926       | B2 |
| TBX4 9496       | B2 |
| TBX5 6910       | B2 |
| TBX6 6911       | B2 |
| TBXA2R 6915     | B2 |
| TBXAS1 6916     | B2 |
| TC2N 123036     | B2 |
| TCAM1P 146771   | B2 |
| TCAP 8557       | B2 |
| TCEA2 6919      | B2 |
| TCEA3 6920      | B2 |
| TCEAL1 9338     | B2 |
| TCEAL3 85012    | B2 |
| TCEAL4 79921    | B2 |
| TCEAL6 158931   | B2 |
| TCEAL8 90843    | B2 |
| TCEANC 170082   | B2 |
| TCEB3B 51224    | B2 |
| TCEB3C 162699   | B2 |
| TCEB3 6924      | B2 |
| TCERG1L 256536  | B2 |

|                 |    |
|-----------------|----|
| TCERG1 10915    | B2 |
| TCF12 6938      | B2 |
| TCF20 6942      | B2 |
| TCF23 150921    | B2 |
| TCFL5 10732     | B2 |
| TCHHL1 126637   | B2 |
| TCHH 7062       | B2 |
| TCHP 84260      | B2 |
| TCIRG1 10312    | B2 |
| TCL1A 8115      | B2 |
| TCL1B 9623      | B2 |
| TCL6 27004      | B2 |
| TCN1 6947       | B2 |
| TCOF1 6949      | B2 |
| TCP10L2 401285  | B2 |
| TCP10L 140290   | B2 |
| TCP11L1 55346   | B2 |
| TCP11 6954      | B2 |
| TCP1 6950       | B2 |
| TCTA 6988       | B2 |
| TCTE1 202500    | B2 |
| TCTE3 6991      | B2 |
| TCTEX1D1 200132 | B2 |
| TCTEX1D4 343521 | B2 |
| TCTN1 79600     | B2 |
| TCTN2 79867     | B2 |
| TCTN3 26123     | B2 |
| TDGF1 6997      | B2 |
| TDGF3 6998      | B2 |
| TDH 157739      | B2 |
| TDO2 6999       | B2 |
| TDP2 51567      | B2 |
| TDRD12 91646    | B2 |
| TDRD1 56165     | B2 |
| TDRD3 81550     | B2 |
| TDRD5 163589    | B2 |
| TDRD7 23424     | B2 |
| TDRD9 122402    | B2 |
| TDRG1 732253    | B2 |
| TEAD2 8463      | B2 |
| TEAD3 7005      | B2 |
| TECPR1 25851    | B2 |
| TECRL 253017    | B2 |
| TECR 9524       | B2 |
| TECTA 7007      | B2 |
| TECTB 6975      | B2 |
| TEC 7006        | B2 |
| TEDDM1 127670   | B2 |
| TEKT1 83659     | B2 |
| TEKT2 27285     | B2 |
| TEKT3 64518     | B2 |

|               |    |
|---------------|----|
| TEKT4 150483  | B2 |
| TEKT5 146279  | B2 |
| TELO2 9894    | B2 |
| TEP1 7011     | B2 |
| TERC 7012     | B2 |
| TERF1 7013    | B2 |
| TERF2IP 54386 | B2 |
| TERF2 7014    | B2 |
| TERT 7015     | B2 |
| TESK1 7016    | B2 |
| TESK2 10420   | B2 |
| TES 26136     | B2 |
| TET1 80312    | B2 |
| TET2 54790    | B2 |
| TEX101 83639  | B2 |
| TEX10 54881   | B2 |
| TEX11 56159   | B2 |
| TEX12 56158   | B2 |
| TEX13B 56156  | B2 |
| TEX14 56155   | B2 |
| TEX15 56154   | B2 |
| TEX19 400629  | B2 |
| TEX261 113419 | B2 |
| TEX264 51368  | B2 |
| TEX2 55852    | B2 |
| TEX9 374618   | B2 |
| TFAMP1 260341 | B2 |
| TFAM 7019     | B2 |
| TFAP2B 7021   | B2 |
| TFAP2C 7022   | B2 |
| TFAP2D 83741  | B2 |
| TFAP2E 339488 | B2 |
| TFAP4 7023    | B2 |
| TFB1M 51106   | B2 |
| TFCP2L1 29842 | B2 |
| TFCP2 7024    | B2 |
| TFDP2 7029    | B2 |
| TFDP3 51270   | B2 |
| TFEB 7942     | B2 |
| TFEC 22797    | B2 |
| TFF1 7031     | B2 |
| TFF2 7032     | B2 |
| TFF3 7033     | B2 |
| TFIP11 24144  | B2 |
| TFPI2 7980    | B2 |
| TGDS 23483    | B2 |
| TGFA 7039     | B2 |
| TGFB2 7042    | B2 |
| TGFBI 7045    | B2 |
| TGFBR1 7046   | B2 |
| TGFBRAP1 9392 | B2 |

|               |    |
|---------------|----|
| TGIF2LX 90316 | B2 |
| TGIF2LY 90655 | B2 |
| TGIF2 60436   | B2 |
| TGM1 7051     | B2 |
| TGM2 7052     | B2 |
| TGM3 7053     | B2 |
| TGM4 7047     | B2 |
| TGM5 9333     | B2 |
| TGM7 116179   | B2 |
| TGOLN2 10618  | B2 |
| TGS1 96764    | B2 |
| TG 7038       | B2 |
| TH1L 51497    | B2 |
| THADA 63892   | B2 |
| THAP10 56906  | B2 |
| THAP11 57215  | B2 |
| THAP1 55145   | B2 |
| THAP2 83591   | B2 |
| THAP3 90326   | B2 |
| THAP4 51078   | B2 |
| THAP5 168451  | B2 |
| THAP6 152815  | B2 |
| THAP7 80764   | B2 |
| THAP8 199745  | B2 |
| THAP9 79725   | B2 |
| THBS1 7057    | B2 |
| THBS3 7059    | B2 |
| THBS4 7060    | B2 |
| THEG 51298    | B2 |
| THEM4 117145  | B2 |
| THEM5 284486  | B2 |
| THEMIS 387357 | B2 |
| THG1L 54974   | B2 |
| THNSL1 79896  | B2 |
| THNSL2 55258  | B2 |
| THOC1 9984    | B2 |
| THOC5 8563    | B2 |
| THOC7 80145   | B2 |
| THOP1 7064    | B2 |
| THPO 7066     | B2 |
| THRAP3 9967   | B2 |
| THSD4 79875   | B2 |
| THTPA 79178   | B2 |
| THUMPD1 55623 | B2 |
| THUMPD2 80745 | B2 |
| TH 7054       | B2 |
| TIA1 7072     | B2 |
| TIAF1 9220    | B2 |
| TIAL1 7073    | B2 |
| TIAM1 7074    | B2 |
| TIAM2 26230   | B2 |

|                  |    |
|------------------|----|
| TICAM1 148022    | B2 |
| TICAM2 353376    | B2 |
| TIFAB 497189     | B2 |
| TIFA 92610       | B2 |
| TIGD1 200765     | B2 |
| TIGD2 166815     | B2 |
| TIGD4 201798     | B2 |
| TIGD6 81789      | B2 |
| TIGD7 91151      | B2 |
| TIMD4 91937      | B2 |
| TIMM10 26519     | B2 |
| TIMM13 26517     | B2 |
| TIMM22 29928     | B2 |
| TIMM44 10469     | B2 |
| TIMM50 92609     | B2 |
| TIMM8B 26521     | B2 |
| TIMM9 26520      | B2 |
| TIMP2 7077       | B2 |
| TIMP3 7078       | B2 |
| TINF2 26277      | B2 |
| TIRAP 114609     | B2 |
| TJAP1 93643      | B2 |
| TKTL2 84076      | B2 |
| TKT 7086         | B2 |
| TLE1 7088        | B2 |
| TLK1 9874        | B2 |
| TLK2 11011       | B2 |
| TLR10 81793      | B2 |
| TLR1 7096        | B2 |
| TLR2 7097        | B2 |
| TLR5 7100        | B2 |
| TLR6 10333       | B2 |
| TLR7 51284       | B2 |
| TLR8 51311       | B2 |
| TLR9 54106       | B2 |
| TLX1NB 100038246 | B2 |
| TLX1 3195        | B2 |
| TLX2 3196        | B2 |
| TLX3 30012       | B2 |
| TM2D1 83941      | B2 |
| TM2D2 83877      | B2 |
| TM2D3 80213      | B2 |
| TM4SF19 116211   | B2 |
| TM4SF1 4071      | B2 |
| TM4SF20 79853    | B2 |
| TM4SF4 7104      | B2 |
| TM4SF5 9032      | B2 |
| TM6SF1 53346     | B2 |
| TM7SF2 7108      | B2 |
| TM7SF3 51768     | B2 |
| TM7SF4 81501     | B2 |

|                        |    |
|------------------------|----|
| TM9SF3 56889           | B2 |
| TMBIM4 51643           | B2 |
| TMC1 117531            | B2 |
| TMC3 342125            | B2 |
| TMC5 79838             | B2 |
| TMC7 79905             | B2 |
| TMC8 147138            | B2 |
| TMCC1 23023            | B2 |
| TMCC2 9911             | B2 |
| TMCO2 127391           | B2 |
| TMCO5A 145942          | B2 |
| TMED10 10972           | B2 |
| TMED1 11018            | B2 |
| TMED5 50999            | B2 |
| TMED6 146456           | B2 |
| TMED7-TICAM2 100302736 | B2 |
| TMED8 283578           | B2 |
| TMEFF1 8577            | B2 |
| TMEFF2 23671           | B2 |
| TMEM101 84336          | B2 |
| TMEM102 284114         | B2 |
| TMEM105 284186         | B2 |
| TMEM106A 113277        | B2 |
| TMEM106B 54664         | B2 |
| TMEM107 84314          | B2 |
| TMEM108 66000          | B2 |
| TMEM110 375346         | B2 |
| TMEM111 55831          | B2 |
| TMEM114 283953         | B2 |
| TMEM115 11070          | B2 |
| TMEM116 89894          | B2 |
| TMEM119 338773         | B2 |
| TMEM11 8834            | B2 |
| TMEM120A 83862         | B2 |
| TMEM121 80757          | B2 |
| TMEM123 114908         | B2 |
| TMEM126A 84233         | B2 |
| TMEM126B 55863         | B2 |
| TMEM128 85013          | B2 |
| TMEM129 92305          | B2 |
| TMEM130 222865         | B2 |
| TMEM131 23505          | B2 |
| TMEM132B 114795        | B2 |
| TMEM132D 121256        | B2 |
| TMEM132E 124842        | B2 |
| TMEM135 65084          | B2 |
| TMEM136 219902         | B2 |
| TMEM138 51524          | B2 |
| TMEM139 135932         | B2 |
| TMEM143 55260          | B2 |
| TMEM144 55314          | B2 |

|                       |    |
|-----------------------|----|
| TMEM145 284339        | B2 |
| TMEM146 257062        | B2 |
| TMEM149 79713         | B2 |
| TMEM14B 81853         | B2 |
| TMEM14C 51522         | B2 |
| TMEM14E 645843        | B2 |
| TMEM150A 129303       | B2 |
| TMEM150B 284417       | B2 |
| TMEM150C 441027       | B2 |
| TMEM151A 256472       | B2 |
| TMEM151B 441151       | B2 |
| TMEM154 201799        | B2 |
| TMEM155 132332        | B2 |
| TMEM156 80008         | B2 |
| TMEM158 25907         | B2 |
| TMEM159 57146         | B2 |
| TMEM160 54958         | B2 |
| TMEM161A 54929        | B2 |
| TMEM161B 153396       | B2 |
| TMEM163 81615         | B2 |
| TMEM164 84187         | B2 |
| TMEM167A 153339       | B2 |
| TMEM167B 56900        | B2 |
| TMEM168 64418         | B2 |
| TMEM169 92691         | B2 |
| TMEM171 134285        | B2 |
| TMEM173 340061        | B2 |
| TMEM174 134288        | B2 |
| TMEM175 84286         | B2 |
| TMEM176A 55365        | B2 |
| TMEM176B 28959        | B2 |
| TMEM179 388021        | B2 |
| TMEM17 200728         | B2 |
| TMEM180 79847         | B2 |
| TMEM181 57583         | B2 |
| TMEM182 130827        | B2 |
| TMEM184B 25829        | B2 |
| TMEM184C 55751        | B2 |
| TMEM185A 84548        | B2 |
| TMEM185B 79134        | B2 |
| TMEM186 25880         | B2 |
| TMEM187 8269          | B2 |
| TMEM188 255919        | B2 |
| TMEM189-UBE2V1 387522 | B2 |
| TMEM189 387521        | B2 |
| TMEM190 147744        | B2 |
| TMEM192 201931        | B2 |
| TMEM194B 100131211    | B2 |
| TMEM196 256130        | B2 |
| TMEM198 130612        | B2 |
| TMEM19 55266          | B2 |



|                 |    |
|-----------------|----|
| TMEM200A 114801 | B2 |
| TMEM200C 645369 | B2 |
| TMEM201 199953  | B2 |
| TMEM203 94107   | B2 |
| TMEM204 79652   | B2 |
| TMEM211 255349  | B2 |
| TMEM212 389177  | B2 |
| TMEM213 155006  | B2 |
| TMEM214 54867   | B2 |
| TMEM215 401498  | B2 |
| TMEM216 51259   | B2 |
| TMEM217 221468  | B2 |
| TMEM219 124446  | B2 |
| TMEM222 84065   | B2 |
| TMEM229A 730130 | B2 |
| TMEM229B 161145 | B2 |
| TMEM231 79583   | B2 |
| TMEM232 642987  | B2 |
| TMEM233 387890  | B2 |
| TMEM25 84866    | B2 |
| TMEM26 219623   | B2 |
| TMEM27 57393    | B2 |
| TMEM2 23670     | B2 |
| TMEM30A 55754   | B2 |
| TMEM30B 161291  | B2 |
| TMEM31 203562   | B2 |
| TMEM38A 79041   | B2 |
| TMEM38B 55151   | B2 |
| TMEM39A 55254   | B2 |
| TMEM39B 55116   | B2 |
| TMEM40 55287    | B2 |
| TMEM44 93109    | B2 |
| TMEM45A 55076   | B2 |
| TMEM45B 120224  | B2 |
| TMEM49 81671    | B2 |
| TMEM50A 23585   | B2 |
| TMEM50B 757     | B2 |
| TMEM51 55092    | B2 |
| TMEM52 339456   | B2 |
| TMEM53 79639    | B2 |
| TMEM55B 90809   | B2 |
| TMEM56 148534   | B2 |
| TMEM59L 25789   | B2 |
| TMEM59 9528     | B2 |
| TMEM5 10329     | B2 |
| TMEM60 85025    | B2 |
| TMEM61 199964   | B2 |
| TMEM62 80021    | B2 |
| TMEM63A 9725    | B2 |
| TMEM64 169200   | B2 |
| TMEM65 157378   | B2 |

|                    |    |
|--------------------|----|
| TMEM66 51669       | B2 |
| TMEM67 91147       | B2 |
| TMEM68 137695      | B2 |
| TMEM70 54968       | B2 |
| TMEM72 643236      | B2 |
| TMEM74 157753      | B2 |
| TMEM81 388730      | B2 |
| TMEM82 388595      | B2 |
| TMEM84 283673      | B2 |
| TMEM85 51234       | B2 |
| TMEM86A 144110     | B2 |
| TMEM86B 255043     | B2 |
| TMEM87A 25963      | B2 |
| TMEM88B 643965     | B2 |
| TMEM89 440955      | B2 |
| TMEM8B 51754       | B2 |
| TMEM8C 389827      | B2 |
| TMEM90A 646658     | B2 |
| TMEM91 641649      | B2 |
| TMEM92 162461      | B2 |
| TMEM93 83460       | B2 |
| TMEM95 339168      | B2 |
| TMEM98 26022       | B2 |
| TMEM99 147184      | B2 |
| TMF1 7110          | B2 |
| TMIGD1 388364      | B2 |
| TMIGD2 126259      | B2 |
| TMOD1 7111         | B2 |
| TMOD3 29766        | B2 |
| TMOD4 29765        | B2 |
| TMPPE 643853       | B2 |
| TMPRSS11A 339967   | B2 |
| TMPRSS11BNL 401136 | B2 |
| TMPRSS11B 132724   | B2 |
| TMPRSS11D 9407     | B2 |
| TMPRSS11F 389208   | B2 |
| TMPRSS12 283471    | B2 |
| TMPRSS13 84000     | B2 |
| TMPRSS15 5651      | B2 |
| TMPRSS2 7113       | B2 |
| TMPRSS3 64699      | B2 |
| TMPRSS4 56649      | B2 |
| TMPRSS5 80975      | B2 |
| TMPRSS6 164656     | B2 |
| TMPRSS7 344805     | B2 |
| TMPRSS9 360200     | B2 |
| TMSB15A 11013      | B2 |
| TMSB15B 286527     | B2 |
| TMSL3 7117         | B2 |
| TMTC2 160335       | B2 |
| TMUB1 83590        | B2 |

|                        |    |
|------------------------|----|
| TMUB2 79089            | B2 |
| TMX2 51075             | B2 |
| TMX3 54495             | B2 |
| TMX4 56255             | B2 |
| TNC 3371               | B2 |
| TNFAIP1 7126           | B2 |
| TNFAIP2 7127           | B2 |
| TNFAIP3 7128           | B2 |
| TNFAIP6 7130           | B2 |
| TNFAIP8L2 79626        | B2 |
| TNFAIP8L3 388121       | B2 |
| TNFAIP8 25816          | B2 |
| TNFRSF10A 8797         | B2 |
| TNFRSF10B 8795         | B2 |
| TNFRSF10C 8794         | B2 |
| TNFRSF11A 8792         | B2 |
| TNFRSF11B 4982         | B2 |
| TNFRSF12A 51330        | B2 |
| TNFRSF13B 23495        | B2 |
| TNFRSF13C 115650       | B2 |
| TNFRSF14 8764          | B2 |
| TNFRSF17 608           | B2 |
| TNFRSF19 55504         | B2 |
| TNFRSF1A 7132          | B2 |
| TNFRSF25 8718          | B2 |
| TNFRSF6B 8771          | B2 |
| TNFRSF9 3604           | B2 |
| TNFSF10 8743           | B2 |
| TNFSF11 8600           | B2 |
| TNFSF12-TNFSF13 407977 | B2 |
| TNFSF13B 10673         | B2 |
| TNFSF13 8741           | B2 |
| TNFSF14 8740           | B2 |
| TNFSF15 9966           | B2 |
| TNFSF18 8995           | B2 |
| TNFSF8 944             | B2 |
| TNFSF9 8744            | B2 |
| TNF 7124               | B2 |
| TNIK 23043             | B2 |
| TNIP2 79155            | B2 |
| TNIP3 79931            | B2 |
| TNK1 8711              | B2 |
| TNK2 10188             | B2 |
| TNKS1BP1 85456         | B2 |
| TNKS2 80351            | B2 |
| TNKS 8658              | B2 |
| TNNC1 7134             | B2 |
| TNNC2 7125             | B2 |
| TNNI1 7135             | B2 |
| TNNI2 7136             | B2 |
| TNNI3K 51086           | B2 |

|                |    |
|----------------|----|
| TNNI3 7137     | B2 |
| TNNT1 7138     | B2 |
| TNNT2 7139     | B2 |
| TNNT3 7140     | B2 |
| TNN 63923      | B2 |
| TNP1 7141      | B2 |
| TNP2 7142      | B2 |
| TNPO1 3842     | B2 |
| TNPO2 30000    | B2 |
| TNPO3 23534    | B2 |
| TNRC18 84629   | B2 |
| TNRC6A 27327   | B2 |
| TNRC6C 57690   | B2 |
| TNR 7143       | B2 |
| TNS3 64759     | B2 |
| TOB1 10140     | B2 |
| TOB2 10766     | B2 |
| TOE1 114034    | B2 |
| TOLLIP 54472   | B2 |
| TOM1L1 10040   | B2 |
| TOM1 10043     | B2 |
| TOMM20L 387990 | B2 |
| TOMM20 9804    | B2 |
| TOMM22 56993   | B2 |
| TOMM5 401505   | B2 |
| TOMM70A 9868   | B2 |
| TOP1MT 116447  | B2 |
| TOP2B 7155     | B2 |
| TOP3A 7156     | B2 |
| TOP3B 8940     | B2 |
| TOPORS 10210   | B2 |
| TOR1AIP1 26092 | B2 |
| TOX2 84969     | B2 |
| TOX4 9878      | B2 |
| TOX 9760       | B2 |
| TP53BP1 7158   | B2 |
| TP53I13 90313  | B2 |
| TP53I3 9540    | B2 |
| TP53INP2 58476 | B2 |
| TP53TG1 11257  | B2 |
| TP53TG5 27296  | B2 |
| TP53 7157      | B2 |
| TP73 7161      | B2 |
| TPCN2 219931   | B2 |
| TPD52L1 7164   | B2 |
| TPD52L2 7165   | B2 |
| TPD52L3 89882  | B2 |
| TPH1 7166      | B2 |
| TPH2 121278    | B2 |
| TPI1P3 728402  | B2 |
| TPK1 27010     | B2 |

|                 |    |
|-----------------|----|
| TPM1 7168       | B2 |
| TPM2 7169       | B2 |
| TPP1 1200       | B2 |
| TPP2 7174       | B2 |
| TPRA1 131601    | B2 |
| TPRG1 285386    | B2 |
| TPRX1 284355    | B2 |
| TPRXL 348825    | B2 |
| TPR 7175        | B2 |
| TPSAB1 7177     | B2 |
| TPSB2 64499     | B2 |
| TPSD1 23430     | B2 |
| TPSG1 25823     | B2 |
| TPST1 8460      | B2 |
| TPST2 8459      | B2 |
| TPTE2 93492     | B2 |
| TPTE 7179       | B2 |
| TRA2A 29896     | B2 |
| TRA2B 6434      | B2 |
| TRABD 80305     | B2 |
| TRADD 8717      | B2 |
| TRAF1 7185      | B2 |
| TRAF3IP1 26146  | B2 |
| TRAF3IP2 10758  | B2 |
| TRAF3IP3 80342  | B2 |
| TRAF3 7187      | B2 |
| TRAF4 9618      | B2 |
| TRAK1 22906     | B2 |
| TRAK2 66008     | B2 |
| TRAM1L1 133022  | B2 |
| TRAM1 23471     | B2 |
| TRAM2 9697      | B2 |
| TRANK1 9881     | B2 |
| TRAP1 10131     | B2 |
| TRAPPC10 7109   | B2 |
| TRAPPC1 58485   | B2 |
| TRAPPC2L 51693  | B2 |
| TRAPPC2P1 10597 | B2 |
| TRAPPC2 6399    | B2 |
| TRAPPC3 27095   | B2 |
| TRAPPC4 51399   | B2 |
| TRAPPC5 126003  | B2 |
| TRAPPC6A 79090  | B2 |
| TRAPPC6B 122553 | B2 |
| TRAT1 50852     | B2 |
| TRDN 10345      | B2 |
| TREM2 54209     | B2 |
| TREML1 340205   | B2 |
| TREML2 79865    | B2 |
| TREML3 340206   | B2 |
| TREML4 285852   | B2 |

|                     |    |
|---------------------|----|
| TREX1 11277         | B2 |
| TREX2 11219         | B2 |
| TRHR 7201           | B2 |
| TRH 7200            | B2 |
| TRIAP1 51499        | B2 |
| TRIB1 10221         | B2 |
| TRIB2 28951         | B2 |
| TRIL 9865           | B2 |
| TRIM10 10107        | B2 |
| TRIM13 10206        | B2 |
| TRIM15 89870        | B2 |
| TRIM16L 147166      | B2 |
| TRIM16 10626        | B2 |
| TRIM17 51127        | B2 |
| TRIM21 6737         | B2 |
| TRIM22 10346        | B2 |
| TRIM25 7706         | B2 |
| TRIM31 11074        | B2 |
| TRIM32 22954        | B2 |
| TRIM33 51592        | B2 |
| TRIM34 53840        | B2 |
| TRIM36 55521        | B2 |
| TRIM37 4591         | B2 |
| TRIM38 10475        | B2 |
| TRIM39 56658        | B2 |
| TRIM3 10612         | B2 |
| TRIM40 135644       | B2 |
| TRIM41 90933        | B2 |
| TRIM42 287015       | B2 |
| TRIM43 129868       | B2 |
| TRIM44 54765        | B2 |
| TRIM45 80263        | B2 |
| TRIM47 91107        | B2 |
| TRIM48 79097        | B2 |
| TRIM49L 729384      | B2 |
| TRIM49 57093        | B2 |
| TRIM4 89122         | B2 |
| TRIM52 84851        | B2 |
| TRIM54 57159        | B2 |
| TRIM55 84675        | B2 |
| TRIM58 25893        | B2 |
| TRIM5 85363         | B2 |
| TRIM6-TRIM34 445372 | B2 |
| TRIM60 166655       | B2 |
| TRIM63 84676        | B2 |
| TRIM65 201292       | B2 |
| TRIM67 440730       | B2 |
| TRIM69 140691       | B2 |
| TRIM6 117854        | B2 |
| TRIM71 131405       | B2 |
| TRIM72 493829       | B2 |

|                 |    |
|-----------------|----|
| TRIM74 378108   | B2 |
| TRIM78P 117852  | B2 |
| TRIM7 81786     | B2 |
| TRIM8 81603     | B2 |
| TRIM9 114088    | B2 |
| TRIML1 339976   | B2 |
| TRIML2 205860   | B2 |
| TRIO 7204       | B2 |
| TRIP11 9321     | B2 |
| TRIP12 9320     | B2 |
| TRIP4 9325      | B2 |
| TRIP6 7205      | B2 |
| TRIT1 54802     | B2 |
| TRMT1 55621     | B2 |
| TRMT2A 27037    | B2 |
| TRMT2B 79979    | B2 |
| TRMT61A 115708  | B2 |
| TRMT61B 55006   | B2 |
| TRMU 55687      | B2 |
| TRNAU1AP 54952  | B2 |
| TRNT1 51095     | B2 |
| TRPA1 8989      | B2 |
| TRPC2 7221      | B2 |
| TRPC3 7222      | B2 |
| TRPC4AP 26133   | B2 |
| TRPC4 7223      | B2 |
| TRPC5 7224      | B2 |
| TRPC7 57113     | B2 |
| TRPM1 4308      | B2 |
| TRPM4 54795     | B2 |
| TRPM5 29850     | B2 |
| TRPM7 54822     | B2 |
| TRPM8 79054     | B2 |
| TRPT1 83707     | B2 |
| TRPV1 7442      | B2 |
| TRPV2 51393     | B2 |
| TRPV3 162514    | B2 |
| TRPV4 59341     | B2 |
| TRPV5 56302     | B2 |
| TRPV6 55503     | B2 |
| TRRAP 8295      | B2 |
| TRY6 154754     | B2 |
| TRYX3 136541    | B2 |
| TSC22D2 9819    | B2 |
| TSC22D4 81628   | B2 |
| TSC2 7249       | B2 |
| TSEN2 80746     | B2 |
| TSG1 643432     | B2 |
| TSGA10IP 254187 | B2 |
| TSGA10 80705    | B2 |
| TSGA13 114960   | B2 |

|                       |    |
|-----------------------|----|
| TSGA14 95681          | B2 |
| TSHB 7252             | B2 |
| TSHR 7253             | B2 |
| TSHZ3 57616           | B2 |
| TSIX 9383             | B2 |
| TSKU 25987            | B2 |
| TSNARE1 203062        | B2 |
| TSNAX-DISC1 100303453 | B2 |
| TSNAXIP1 55815        | B2 |
| TSN 7247              | B2 |
| TSPAN10 83882         | B2 |
| TSPAN12 23554         | B2 |
| TSPAN16 26526         | B2 |
| TSPAN19 144448        | B2 |
| TSPAN31 6302          | B2 |
| TSPAN32 10077         | B2 |
| TSPAN33 340348        | B2 |
| TSPAN5 10098          | B2 |
| TSPAN8 7103           | B2 |
| TSPAN9 10867          | B2 |
| TSPO2 222642          | B2 |
| TSPO 706              | B2 |
| TSPYL1 7259           | B2 |
| TSPYL3 128854         | B2 |
| TSPYL4 23270          | B2 |
| TSPYL5 85453          | B2 |
| TSPYL6 388951         | B2 |
| TSR1 55720            | B2 |
| TSR2 90121            | B2 |
| TSSC4 10078           | B2 |
| TSSK1B 83942          | B2 |
| TSSK6 83983           | B2 |
| TSTD2 158427          | B2 |
| TST 7263              | B2 |
| TTBK1 84630           | B2 |
| TTC12 54970           | B2 |
| TTC14 151613          | B2 |
| TTC15 51112           | B2 |
| TTC16 158248          | B2 |
| TTC17 55761           | B2 |
| TTC18 118491          | B2 |
| TTC19 54902           | B2 |
| TTC1 7265             | B2 |
| TTC21A 199223         | B2 |
| TTC22 55001           | B2 |
| TTC23L 153657         | B2 |
| TTC24 164118          | B2 |
| TTC25 83538           | B2 |
| TTC27 55622           | B2 |
| TTC29 83894           | B2 |
| TTC30A 92104          | B2 |



|                |    |
|----------------|----|
| TTC30B 150737  | B2 |
| TTC31 64427    | B2 |
| TTC32 130502   | B2 |
| TTC35 9694     | B2 |
| TTC36 143941   | B2 |
| TTC37 9652     | B2 |
| TTC39B 158219  | B2 |
| TTC39C 125488  | B2 |
| TTC3 7267      | B2 |
| TTC4 7268      | B2 |
| TTC5 91875     | B2 |
| TTC7A 57217    | B2 |
| TTC8 123016    | B2 |
| TTF1 7270      | B2 |
| TTF2 8458      | B2 |
| TTLL13 440307  | B2 |
| TTLL1 25809    | B2 |
| TTLL2 83887    | B2 |
| TTLL4 9654     | B2 |
| TTLL5 23093    | B2 |
| TTLL6 284076   | B2 |
| TTLL7 79739    | B2 |
| TTLL8 164714   | B2 |
| TTLL9 164395   | B2 |
| TTL 150465     | B2 |
| TTN 7273       | B2 |
| TTPAL 79183    | B2 |
| TTPA 7274      | B2 |
| TTR 7276       | B2 |
| TTY15 64595    | B2 |
| TTYH1 57348    | B2 |
| TTYH2 94015    | B2 |
| TUBA1A 7846    | B2 |
| TUBA3C 7278    | B2 |
| TUBA3D 113457  | B2 |
| TUBA3E 112714  | B2 |
| TUBA4A 7277    | B2 |
| TUBA4B 80086   | B2 |
| TUBA8 51807    | B2 |
| TUBAL3 79861   | B2 |
| TUBB1 81027    | B2 |
| TUBB4Q 56604   | B2 |
| TUBB4 10382    | B2 |
| TUBBP5 643224  | B2 |
| TUBD1 51174    | B2 |
| TUBGCP2 10844  | B2 |
| TUBGCP3 10426  | B2 |
| TUBGCP4 27229  | B2 |
| TUBGCP5 114791 | B2 |
| TUG1 55000     | B2 |
| TULP1 7287     | B2 |

|                  |    |
|------------------|----|
| TULP3 7289       | B2 |
| TUSC1 286319     | B2 |
| TUSC2 11334      | B2 |
| TUSC3 7991       | B2 |
| TUT1 64852       | B2 |
| TWF2 11344       | B2 |
| TWISTNB 221830   | B2 |
| TXK 7294         | B2 |
| TXLNA 200081     | B2 |
| TXLNB 167838     | B2 |
| TXLNG 55787      | B2 |
| TXN2 25828       | B2 |
| TXNDC15 79770    | B2 |
| TXNDC16 57544    | B2 |
| TXNDC3 51314     | B2 |
| TXNDC5 81567     | B2 |
| TXNL4B 54957     | B2 |
| TXNRD1 7296      | B2 |
| TXNRD2 10587     | B2 |
| TXNRD3IT1 645840 | B2 |
| TYK2 7297        | B2 |
| TYROBP 7305      | B2 |
| TYRP1 7306       | B2 |
| TYR 7299         | B2 |
| TYSND1 219743    | B2 |
| TYW1B 441250     | B2 |
| TYW1 55253       | B2 |
| T 6862           | B2 |
| U2AF1L4 199746   | B2 |
| U2AF1 7307       | B2 |
| UAP1L1 91373     | B2 |
| UAP1 6675        | B2 |
| UBA2 10054       | B2 |
| UBA3 9039        | B2 |
| UBA52 7311       | B2 |
| UBA5 79876       | B2 |
| UBA6 55236       | B2 |
| UBA7 7318        | B2 |
| UBAC1 10422      | B2 |
| UBAC2 337867     | B2 |
| UBAP2 55833      | B2 |
| UBASH3A 53347    | B2 |
| UBASH3B 84959    | B2 |
| UBB 7314         | B2 |
| UBC 7316         | B2 |
| UBD 10537        | B2 |
| UBE2B 7320       | B2 |
| UBE2CBP 90025    | B2 |
| UBE2D1 7321      | B2 |
| UBE2D3 7323      | B2 |
| UBE2D4 51619     | B2 |

|                   |    |
|-------------------|----|
| UBE2DNL 100131816 | B2 |
| UBE2E2 7325       | B2 |
| UBE2G1 7326       | B2 |
| UBE2J1 51465      | B2 |
| UBE2J2 118424     | B2 |
| UBE2L3 7332       | B2 |
| UBE2NL 389898     | B2 |
| UBE2Q2 92912      | B2 |
| UBE2QL1 134111    | B2 |
| UBE2R2 54926      | B2 |
| UBE2U 148581      | B2 |
| UBE2V1 7335       | B2 |
| UBE2Z 65264       | B2 |
| UBE3A 7337        | B2 |
| UBE3B 89910       | B2 |
| UBE3C 9690        | B2 |
| UBE4A 9354        | B2 |
| UBE4B 10277       | B2 |
| UBIAD1 29914      | B2 |
| UBL3 5412         | B2 |
| UBL4B 164153      | B2 |
| UBL7 84993        | B2 |
| UBLCP1 134510     | B2 |
| UBN2 254048       | B2 |
| UBOX5 22888       | B2 |
| UBP1 7342         | B2 |
| UBQLN1 29979      | B2 |
| UBQLN2 29978      | B2 |
| UBQLN3 50613      | B2 |
| UBQLNL 143630     | B2 |
| UBR1 197131       | B2 |
| UBR2 23304        | B2 |
| UBR3 130507       | B2 |
| UBR4 23352        | B2 |
| UBR5 51366        | B2 |
| UBTD1 80019       | B2 |
| UBTF 7343         | B2 |
| UBXN10 127733     | B2 |
| UBXN11 91544      | B2 |
| UBXN1 51035       | B2 |
| UBXN2A 165324     | B2 |
| UBXN6 80700       | B2 |
| UBXN7 26043       | B2 |
| UBXN8 7993        | B2 |
| UCA1 652995       | B2 |
| UACL1 7345        | B2 |
| UACL3 7347        | B2 |
| UCK1 83549        | B2 |
| UCKL1AS 100113386 | B2 |
| UCKL1 54963       | B2 |
| UCMA 221044       | B2 |

|                 |    |
|-----------------|----|
| UCN2 90226      | B2 |
| UCN3 114131     | B2 |
| UCN 7349        | B2 |
| UCP1 7350       | B2 |
| UCP2 7351       | B2 |
| UCP3 7352       | B2 |
| UEVLD 55293     | B2 |
| UFM1 51569      | B2 |
| UFSP1 402682    | B2 |
| UGCG 7357       | B2 |
| UGDH 7358       | B2 |
| UGGT2 55757     | B2 |
| UGT1A10 54575   | B2 |
| UGT1A1 54658    | B2 |
| UGT1A3 54659    | B2 |
| UGT1A4 54657    | B2 |
| UGT1A6 54578    | B2 |
| UGT1A7 54577    | B2 |
| UGT1A8 54576    | B2 |
| UGT1A9 54600    | B2 |
| UGT2A1 10941    | B2 |
| UGT2A3 79799    | B2 |
| UGT2B10 7365    | B2 |
| UGT2B11 10720   | B2 |
| UGT2B15 7366    | B2 |
| UGT2B28 54490   | B2 |
| UGT2B4 7363     | B2 |
| UGT2B7 7364     | B2 |
| UGT3A1 133688   | B2 |
| UGT3A2 167127   | B2 |
| UGT8 7368       | B2 |
| UHMK1 127933    | B2 |
| UHRF1BP1L 23074 | B2 |
| UHRF1BP1 54887  | B2 |
| UHRF2 115426    | B2 |
| ULBP1 80329     | B2 |
| ULBP2 80328     | B2 |
| ULBP3 79465     | B2 |
| ULK1 8408       | B2 |
| ULK2 9706       | B2 |
| ULK3 25989      | B2 |
| ULK4 54986      | B2 |
| UMODL1 89766    | B2 |
| UMOD 7369       | B2 |
| UNC119 9094     | B2 |
| UNC13A 23025    | B2 |
| UNC13B 10497    | B2 |
| UNC13C 440279   | B2 |
| UNC13D 201294   | B2 |
| UNC45A 55898    | B2 |
| UNC45B 146862   | B2 |

|                  |    |
|------------------|----|
| UNC50 25972      | B2 |
| UNC5A 90249      | B2 |
| UNC5CL 222643    | B2 |
| UNC5C 8633       | B2 |
| UNC5D 137970     | B2 |
| UNC80 285175     | B2 |
| UNC93A 54346     | B2 |
| UNG 7374         | B2 |
| UNK 85451        | B2 |
| UOX 391051       | B2 |
| UPB1 51733       | B2 |
| UPF0639 400224   | B2 |
| UPF1 5976        | B2 |
| UPF2 26019       | B2 |
| UPF3A 65110      | B2 |
| UPF3B 65109      | B2 |
| UPK1A 11045      | B2 |
| UPK1B 7348       | B2 |
| UPK2 7379        | B2 |
| UPK3A 7380       | B2 |
| UPK3BL 100134938 | B2 |
| UPK3B 80761      | B2 |
| UPP1 7378        | B2 |
| UPP2 151531      | B2 |
| UQCC 55245       | B2 |
| UQCR10 29796     | B2 |
| UQCR11 10975     | B2 |
| UQCRB 7381       | B2 |
| UQCRC1 7384      | B2 |
| UQCRC2 7385      | B2 |
| UQCRFS1 7386     | B2 |
| UQCRHL 440567    | B2 |
| UQCRH 7388       | B2 |
| URB1 9875        | B2 |
| URGCP 55665      | B2 |
| URM1 81605       | B2 |
| UROC1 131669     | B2 |
| UROS 7390        | B2 |
| USE1 55850       | B2 |
| USF2 7392        | B2 |
| USH1C 10083      | B2 |
| USH1G 124590     | B2 |
| USH2A 7399       | B2 |
| USMG5 84833      | B2 |
| USO1 8615        | B2 |
| USP10 9100       | B2 |
| USP12 219333     | B2 |
| USP13 8975       | B2 |
| USP15 9958       | B2 |
| USP16 10600      | B2 |
| USP17L2 377630   | B2 |

|                 |    |
|-----------------|----|
| USP17L6P 391622 | B2 |
| USP17 391627    | B2 |
| USP1 7398       | B2 |
| USP20 10868     | B2 |
| USP22 23326     | B2 |
| USP24 23358     | B2 |
| USP26 83844     | B2 |
| USP27X 389856   | B2 |
| USP28 57646     | B2 |
| USP29 57663     | B2 |
| USP2 9099       | B2 |
| USP32 84669     | B2 |
| USP33 23032     | B2 |
| USP34 9736      | B2 |
| USP35 57558     | B2 |
| USP36 57602     | B2 |
| USP38 84640     | B2 |
| USP3 9960       | B2 |
| USP40 55230     | B2 |
| USP42 84132     | B2 |
| USP43 124739    | B2 |
| USP45 85015     | B2 |
| USP46 64854     | B2 |
| USP47 55031     | B2 |
| USP48 84196     | B2 |
| USP49 25862     | B2 |
| USP4 7375       | B2 |
| USP50 373509    | B2 |
| USP51 158880    | B2 |
| USP54 159195    | B2 |
| USP6NL 9712     | B2 |
| USP6 9098       | B2 |
| USP8 9101       | B2 |
| USP9X 8239      | B2 |
| USP9Y 8287      | B2 |
| USPL1 10208     | B2 |
| UTF1 8433       | B2 |
| UTP11L 51118    | B2 |
| UTP14A 10813    | B2 |
| UTP14C 9724     | B2 |
| UTP15 84135     | B2 |
| UTP18 51096     | B2 |
| UTP20 27340     | B2 |
| UTP23 84294     | B2 |
| UTP3 57050      | B2 |
| UTP6 55813      | B2 |
| UTS2R 2837      | B2 |
| UTS2 10911      | B2 |
| UTY 7404        | B2 |
| UXT 8409        | B2 |
| VAC14 55697     | B2 |

|                |    |
|----------------|----|
| VAMP1 6843     | B2 |
| VAMP4 8674     | B2 |
| VAMP5 10791    | B2 |
| VAMP7 6845     | B2 |
| VANGL2 57216   | B2 |
| VAPA 9218      | B2 |
| VAPB 9217      | B2 |
| VASH1 22846    | B2 |
| VASH2 79805    | B2 |
| VASN 114990    | B2 |
| VAT1L 57687    | B2 |
| VAT1 10493     | B2 |
| VAV1 7409      | B2 |
| VAX1 11023     | B2 |
| VAX2 25806     | B2 |
| VCAM1 7412     | B2 |
| VCL 7414       | B2 |
| VCPIP1 80124   | B2 |
| VCX2 51480     | B2 |
| VCX3A 51481    | B2 |
| VCX3B 425054   | B2 |
| VCX 26609      | B2 |
| VDAC2 7417     | B2 |
| VDAC3 7419     | B2 |
| VDR 7421       | B2 |
| VEGFA 7422     | B2 |
| VENTXP1 139538 | B2 |
| VENTXP7 391518 | B2 |
| VEPH1 79674    | B2 |
| VEZF1 7716     | B2 |
| VGf 7425       | B2 |
| VGLL1 51442    | B2 |
| VGLL2 245806   | B2 |
| VGLL4 9686     | B2 |
| VHLL 391104    | B2 |
| VHL 7428       | B2 |
| VIL1 7429      | B2 |
| VIPAR 63894    | B2 |
| VIPR2 7434     | B2 |
| VMA21 203547   | B2 |
| VMAC 400673    | B2 |
| VMO1 284013    | B2 |
| VN1R1 57191    | B2 |
| VN1R2 317701   | B2 |
| VN1R5 317705   | B2 |
| VNN1 8876      | B2 |
| VNN2 8875      | B2 |
| VNN3 55350     | B2 |
| VPRBP 9730     | B2 |
| VPREB1 7441    | B2 |
| VPREB3 29802   | B2 |

|                |    |
|----------------|----|
| VPS13B 157680  | B2 |
| VPS13C 54832   | B2 |
| VPS16 64601    | B2 |
| VPS18 57617    | B2 |
| VPS26A 9559    | B2 |
| VPS26B 112936  | B2 |
| VPS29 51699    | B2 |
| VPS33B 26276   | B2 |
| VPS35 55737    | B2 |
| VPS37A 137492  | B2 |
| VPS37B 79720   | B2 |
| VPS37D 155382  | B2 |
| VPS41 27072    | B2 |
| VPS4A 27183    | B2 |
| VPS4B 9525     | B2 |
| VPS53 55275    | B2 |
| VPS54 51542    | B2 |
| VPS8 23355     | B2 |
| VRK2 7444      | B2 |
| VRK3 51231     | B2 |
| VSIG10L 147645 | B2 |
| VSIG10 54621   | B2 |
| VSIG1 340547   | B2 |
| VSIG2 23584    | B2 |
| VSIG4 11326    | B2 |
| VSIG8 391123   | B2 |
| VSTM1 284415   | B2 |
| VSTM2A 222008  | B2 |
| VSTM2B 342865  | B2 |
| VSTM2L 128434  | B2 |
| VSX1 30813     | B2 |
| VSX2 338917    | B2 |
| VTA1 51534     | B2 |
| VTCN1 79679    | B2 |
| VTI1A 143187   | B2 |
| VTI1B 10490    | B2 |
| VTN 7448       | B2 |
| VWA2 340706    | B2 |
| VWA3A 146177   | B2 |
| VWA3B 200403   | B2 |
| VWA5B1 127731  | B2 |
| VWA5B2 90113   | B2 |
| VWC2L 402117   | B2 |
| VWC2 375567    | B2 |
| VWDE 221806    | B2 |
| WAC 51322      | B2 |
| WAPAL 23063    | B2 |
| WARS2 10352    | B2 |
| WARS 7453      | B2 |
| WASF1 8936     | B2 |
| WASH2P 375260  | B2 |



|                |    |
|----------------|----|
| WASH3P 374666  | B2 |
| WASH5P 375690  | B2 |
| WASH7P 653635  | B2 |
| WASL 8976      | B2 |
| WAS 7454       | B2 |
| WBP11P1 441818 | B2 |
| WBP11 51729    | B2 |
| WBP2 23558     | B2 |
| WBP5 51186     | B2 |
| WBSCR16 81554  | B2 |
| WBSCR17 64409  | B2 |
| WBSCR26 171022 | B2 |
| WBSCR27 155368 | B2 |
| WDFY1 57590    | B2 |
| WDFY3 23001    | B2 |
| WDFY4 57705    | B2 |
| WDR16 146845   | B2 |
| WDR17 116966   | B2 |
| WDR18 57418    | B2 |
| WDR20 91833    | B2 |
| WDR25 79446    | B2 |
| WDR31 114987   | B2 |
| WDR33 55339    | B2 |
| WDR35 57539    | B2 |
| WDR36 134430   | B2 |
| WDR38 401551   | B2 |
| WDR3 10885     | B2 |
| WDR41 55255    | B2 |
| WDR43 23160    | B2 |
| WDR44 54521    | B2 |
| WDR45L 56270   | B2 |
| WDR45 11152    | B2 |
| WDR46 9277     | B2 |
| WDR47 22911    | B2 |
| WDR49 151790   | B2 |
| WDR4 10785     | B2 |
| WDR52 55779    | B2 |
| WDR53 348793   | B2 |
| WDR5B 54554    | B2 |
| WDR5 11091     | B2 |
| WDR60 55112    | B2 |
| WDR61 80349    | B2 |
| WDR62 284403   | B2 |
| WDR63 126820   | B2 |
| WDR64 128025   | B2 |
| WDR65 149465   | B2 |
| WDR66 144406   | B2 |
| WDR69 164781   | B2 |
| WDR6 11180     | B2 |
| WDR70 55100    | B2 |
| WDR72 256764   | B2 |

|                |    |
|----------------|----|
| WDR73 84942    | B2 |
| WDR74 54663    | B2 |
| WDR77 79084    | B2 |
| WDR78 79819    | B2 |
| WDR7 23335     | B2 |
| WDR82 80335    | B2 |
| WDR83 84292    | B2 |
| WDR85 92715    | B2 |
| WDR87 83889    | B2 |
| WDR88 126248   | B2 |
| WDR89 112840   | B2 |
| WDR8 49856     | B2 |
| WDR91 29062    | B2 |
| WDR92 116143   | B2 |
| WDR93 56964    | B2 |
| WDSUB1 151525  | B2 |
| WEE1 7465      | B2 |
| WEE2 494551    | B2 |
| WFDC10A 140832 | B2 |
| WFDC10B 280664 | B2 |
| WFDC11 259239  | B2 |
| WFDC12 128488  | B2 |
| WFDC13 164237  | B2 |
| WFDC1 58189    | B2 |
| WFDC2 10406    | B2 |
| WFDC3 140686   | B2 |
| WFDC5 149708   | B2 |
| WFDC6 140870   | B2 |
| WFDC8 90199    | B2 |
| WFIKKN1 117166 | B2 |
| WFIKKN2 124857 | B2 |
| WFS1 7466      | B2 |
| WHSC1L1 54904  | B2 |
| WHSC2 7469     | B2 |
| WIF1 11197     | B2 |
| WIPF1 7456     | B2 |
| WIPF2 147179   | B2 |
| WIPF3 644150   | B2 |
| WIPI1 55062    | B2 |
| WIPI2 26100    | B2 |
| WISP3 8838     | B2 |
| WIT1 51352     | B2 |
| WIZ 58525      | B2 |
| WNK1 65125     | B2 |
| WNK3 65267     | B2 |
| WNK4 65266     | B2 |
| WNT10A 80326   | B2 |
| WNT10B 7480    | B2 |
| WNT11 7481     | B2 |
| WNT16 51384    | B2 |
| WNT1 7471      | B2 |

|               |    |
|---------------|----|
| WNT2B 7482    | B2 |
| WNT3A 89780   | B2 |
| WNT3 7473     | B2 |
| WNT4 54361    | B2 |
| WNT5A 7474    | B2 |
| WNT5B 81029   | B2 |
| WNT6 7475     | B2 |
| WNT7A 7476    | B2 |
| WNT8A 7478    | B2 |
| WNT8B 7479    | B2 |
| WNT9A 7483    | B2 |
| WRAP53 55135  | B2 |
| WRB 7485      | B2 |
| WRN 7486      | B2 |
| WSB2 55884    | B2 |
| WT1 7490      | B2 |
| WWC1 23286    | B2 |
| WWC2 80014    | B2 |
| WWC3 55841    | B2 |
| WWOX 51741    | B2 |
| WWP1 11059    | B2 |
| WWP2 11060    | B2 |
| WWTR1 25937   | B2 |
| XAB2 56949    | B2 |
| XAF1 54739    | B2 |
| XAGE1D 9503   | B2 |
| XAGE2 9502    | B2 |
| XAGE3 170626  | B2 |
| XAGE5 170627  | B2 |
| XCL1 6375     | B2 |
| XCL2 6846     | B2 |
| XCR1 2829     | B2 |
| XDH 7498      | B2 |
| XG 7499       | B2 |
| XIAP 331      | B2 |
| XIRP1 165904  | B2 |
| XIRP2 129446  | B2 |
| XKR3 150165   | B2 |
| XKR4 114786   | B2 |
| XKR5 389610   | B2 |
| XKR7 343702   | B2 |
| XKR8 55113    | B2 |
| XKR9 389668   | B2 |
| XKRX 402415   | B2 |
| XK 7504       | B2 |
| XPNPEP1 7511  | B2 |
| XPNPEP3 63929 | B2 |
| XPO4 64328    | B2 |
| XPO7 23039    | B2 |
| XRCC1 7515    | B2 |
| XRCC3 7517    | B2 |

|                |    |
|----------------|----|
| XRCC6BP1 91419 | B2 |
| XRCC6 2547     | B2 |
| XRN1 54464     | B2 |
| XRN2 22803     | B2 |
| XRRA1 143570   | B2 |
| XYLT1 64131    | B2 |
| XYLT2 64132    | B2 |
| YAF2 10138     | B2 |
| YBX1 4904      | B2 |
| YBX2 51087     | B2 |
| YEATS2 55689   | B2 |
| YES1 7525      | B2 |
| YIPF4 84272    | B2 |
| YIPF5 81555    | B2 |
| YIPF7 285525   | B2 |
| YJEFN3 374887  | B2 |
| YOD1 55432     | B2 |
| YPEL1 29799    | B2 |
| YPEL2 388403   | B2 |
| YPEL3 83719    | B2 |
| YPEL5 51646    | B2 |
| YRDC 79693     | B2 |
| YSK4 80122     | B2 |
| YTHDC1 91746   | B2 |
| YTHDC2 64848   | B2 |
| YTHDF2 51441   | B2 |
| YTHDF3 253943  | B2 |
| YWHAE 7531     | B2 |
| YWHAG 7532     | B2 |
| YWHAQ 10971    | B2 |
| ZACN 353174    | B2 |
| ZADH2 284273   | B2 |
| ZAN 7455       | B2 |
| ZAP70 7535     | B2 |
| ZAR1L 646799   | B2 |
| ZAR1 326340    | B2 |
| ZBBX 79740     | B2 |
| ZBED1 9189     | B2 |
| ZBED2 79413    | B2 |
| ZBED5 58486    | B2 |
| ZBP1 81030     | B2 |
| ZBTB10 65986   | B2 |
| ZBTB11 27107   | B2 |
| ZBTB17 7709    | B2 |
| ZBTB22 9278    | B2 |
| ZBTB24 9841    | B2 |
| ZBTB25 7597    | B2 |
| ZBTB26 57684   | B2 |
| ZBTB2 57621    | B2 |
| ZBTB32 27033   | B2 |
| ZBTB33 10009   | B2 |

|                 |    |
|-----------------|----|
| ZBTB37 84614    | B2 |
| ZBTB39 9880     | B2 |
| ZBTB3 79842     | B2 |
| ZBTB43 23099    | B2 |
| ZBTB45 84878    | B2 |
| ZBTB46 140685   | B2 |
| ZBTB48 3104     | B2 |
| ZBTB5 9925      | B2 |
| ZBTB6 10773     | B2 |
| ZBTB7A 51341    | B2 |
| ZBTB7C 201501   | B2 |
| ZBTB8A 653121   | B2 |
| ZBTB8B 728116   | B2 |
| ZC3H10 84872    | B2 |
| ZC3H11A 9877    | B2 |
| ZC3H12A 80149   | B2 |
| ZC3H12D 340152  | B2 |
| ZC3H14 79882    | B2 |
| ZC3H18 124245   | B2 |
| ZC3H4 23211     | B2 |
| ZC3H7A 29066    | B2 |
| ZC3H8 84524     | B2 |
| ZC3HAV1L 92092  | B2 |
| ZC3HAV1 56829   | B2 |
| ZC3HC1 51530    | B2 |
| ZC4H2 55906     | B2 |
| ZCCHC14 23174   | B2 |
| ZCCHC16 340595  | B2 |
| ZCCHC17 51538   | B2 |
| ZCCHC18 644353  | B2 |
| ZCCHC2 54877    | B2 |
| ZCCHC3 85364    | B2 |
| ZCCHC5 203430   | B2 |
| ZCCHC6 79670    | B2 |
| ZCCHC7 84186    | B2 |
| ZCCHC8 55596    | B2 |
| ZCCHC9 84240    | B2 |
| ZCRB1 85437     | B2 |
| ZDHHC11 79844   | B2 |
| ZDHHC14 79683   | B2 |
| ZDHHC18 84243   | B2 |
| ZDHHC19 131540  | B2 |
| ZDHHC20 253832  | B2 |
| ZDHHC21 340481  | B2 |
| ZDHHC22 283576  | B2 |
| ZDHHC23 254887  | B2 |
| ZDHHC3 51304    | B2 |
| ZDHHC4 55146    | B2 |
| ZDHHC5 25921    | B2 |
| ZDHHC7 55625    | B2 |
| ZDHHC8P1 150244 | B2 |

|                   |    |
|-------------------|----|
| ZEB1 6935         | B2 |
| ZFAND1 79752      | B2 |
| ZFAND2A 90637     | B2 |
| ZFAND2B 130617    | B2 |
| ZFAND3 60685      | B2 |
| ZFAND6 54469      | B2 |
| ZFATAS 594840     | B2 |
| ZFAT 57623        | B2 |
| ZFC3H1 196441     | B2 |
| ZFHX3 463         | B2 |
| ZFP106 64397      | B2 |
| ZFP112 7771       | B2 |
| ZFP14 57677       | B2 |
| ZFP1 162239       | B2 |
| ZFP30 22835       | B2 |
| ZFP3 124961       | B2 |
| ZFP41 286128      | B2 |
| ZFP42 132625      | B2 |
| ZFP57 346171      | B2 |
| ZFP82 284406      | B2 |
| ZFP91-CNTF 386607 | B2 |
| ZFP91 80829       | B2 |
| ZFP92 139735      | B2 |
| ZFPL1 7542        | B2 |
| ZFR2 23217        | B2 |
| ZFR 51663         | B2 |
| ZFX 7543          | B2 |
| ZFYVE16 9765      | B2 |
| ZFYVE19 84936     | B2 |
| ZFYVE26 23503     | B2 |
| ZFYVE27 118813    | B2 |
| ZFY 7544          | B2 |
| ZG16 653808       | B2 |
| ZGLP1 100125288   | B2 |
| ZGPAT 84619       | B2 |
| ZHX1 11244        | B2 |
| ZHX2 22882        | B2 |
| ZIC1 7545         | B2 |
| ZIC3 7547         | B2 |
| ZIC4 84107        | B2 |
| ZIC5 85416        | B2 |
| ZIK1 284307       | B2 |
| ZIM2 23619        | B2 |
| ZKSCAN1 7586      | B2 |
| ZKSCAN2 342357    | B2 |
| ZKSCAN3 80317     | B2 |
| ZKSCAN4 387032    | B2 |
| ZKSCAN5 23660     | B2 |
| ZMAT2 153527      | B2 |
| ZMAT4 79698       | B2 |
| ZMAT5 55954       | B2 |

|                |    |
|----------------|----|
| ZMIZ1 57178    | B2 |
| ZMIZ2 83637    | B2 |
| ZMYM1 79830    | B2 |
| ZMYM2 7750     | B2 |
| ZMYM3 9203     | B2 |
| ZMYM4 9202     | B2 |
| ZMYM5 9205     | B2 |
| ZMYM6 9204     | B2 |
| ZMYND11 10771  | B2 |
| ZMYND12 84217  | B2 |
| ZMYND15 84225  | B2 |
| ZMYND17 118490 | B2 |
| ZNF100 163227  | B2 |
| ZNF101 94039   | B2 |
| ZNF107 51427   | B2 |
| ZNF114 163071  | B2 |
| ZNF117 51351   | B2 |
| ZNF121 7675    | B2 |
| ZNF12 7559     | B2 |
| ZNF131 7690    | B2 |
| ZNF134 7693    | B2 |
| ZNF135 7694    | B2 |
| ZNF136 7695    | B2 |
| ZNF137 7696    | B2 |
| ZNF140 7699    | B2 |
| ZNF141 7700    | B2 |
| ZNF142 7701    | B2 |
| ZNF143 7702    | B2 |
| ZNF148 7707    | B2 |
| ZNF14 7561     | B2 |
| ZNF155 7711    | B2 |
| ZNF165 7718    | B2 |
| ZNF169 169841  | B2 |
| ZNF16 7564     | B2 |
| ZNF175 7728    | B2 |
| ZNF177 7730    | B2 |
| ZNF17 7565     | B2 |
| ZNF180 7733    | B2 |
| ZNF181 339318  | B2 |
| ZNF182 7569    | B2 |
| ZNF185 7739    | B2 |
| ZNF18 7566     | B2 |
| ZNF192 7745    | B2 |
| ZNF193 7746    | B2 |
| ZNF195 7748    | B2 |
| ZNF197 10168   | B2 |
| ZNF19 7567     | B2 |
| ZNF205 7755    | B2 |
| ZNF20 7568     | B2 |
| ZNF211 10520   | B2 |
| ZNF212 7988    | B2 |

|                |    |
|----------------|----|
| ZNF214 7761    | B2 |
| ZNF215 7762    | B2 |
| ZNF217 7764    | B2 |
| ZNF221 7638    | B2 |
| ZNF222 7673    | B2 |
| ZNF223 7766    | B2 |
| ZNF224 7767    | B2 |
| ZNF225 7768    | B2 |
| ZNF226 7769    | B2 |
| ZNF227 7770    | B2 |
| ZNF229 7772    | B2 |
| ZNF230 7773    | B2 |
| ZNF232 7775    | B2 |
| ZNF233 353355  | B2 |
| ZNF234 10780   | B2 |
| ZNF235 9310    | B2 |
| ZNF236 7776    | B2 |
| ZNF238 10472   | B2 |
| ZNF24 7572     | B2 |
| ZNF250 58500   | B2 |
| ZNF251 90987   | B2 |
| ZNF252 286101  | B2 |
| ZNF253 56242   | B2 |
| ZNF254 9534    | B2 |
| ZNF256 10172   | B2 |
| ZNF257 113835  | B2 |
| ZNF259 8882    | B2 |
| ZNF263 10127   | B2 |
| ZNF264 9422    | B2 |
| ZNF266 10781   | B2 |
| ZNF268 10795   | B2 |
| ZNF26 7574     | B2 |
| ZNF271 10778   | B2 |
| ZNF274 10782   | B2 |
| ZNF275 10838   | B2 |
| ZNF277 11179   | B2 |
| ZNF280A 129025 | B2 |
| ZNF280B 140883 | B2 |
| ZNF280C 55609  | B2 |
| ZNF282 8427    | B2 |
| ZNF283 284349  | B2 |
| ZNF284 342909  | B2 |
| ZNF285 26974   | B2 |
| ZNF286A 57335  | B2 |
| ZNF286B 729288 | B2 |
| ZNF287 57336   | B2 |
| ZNF292 23036   | B2 |
| ZNF295 49854   | B2 |
| ZNF2 7549      | B2 |
| ZNF300 91975   | B2 |
| ZNF302 55900   | B2 |



|                |    |
|----------------|----|
| ZNF304 57343   | B2 |
| ZNF30 90075    | B2 |
| ZNF311 282890  | B2 |
| ZNF317 57693   | B2 |
| ZNF318 24149   | B2 |
| ZNF320 162967  | B2 |
| ZNF321 399669  | B2 |
| ZNF322A 79692  | B2 |
| ZNF322B 387328 | B2 |
| ZNF323 64288   | B2 |
| ZNF324B 388569 | B2 |
| ZNF324 25799   | B2 |
| ZNF326 284695  | B2 |
| ZNF329 79673   | B2 |
| ZNF32 7580     | B2 |
| ZNF335 63925   | B2 |
| ZNF33A 7581    | B2 |
| ZNF33B 7582    | B2 |
| ZNF343 79175   | B2 |
| ZNF346 23567   | B2 |
| ZNF347 84671   | B2 |
| ZNF34 80778    | B2 |
| ZNF350 59348   | B2 |
| ZNF354A 6940   | B2 |
| ZNF358 140467  | B2 |
| ZNF35 7584     | B2 |
| ZNF362 149076  | B2 |
| ZNF365 22891   | B2 |
| ZNF37A 7587    | B2 |
| ZNF382 84911   | B2 |
| ZNF384 171017  | B2 |
| ZNF385A 25946  | B2 |
| ZNF385B 151126 | B2 |
| ZNF385D 79750  | B2 |
| ZNF394 84124   | B2 |
| ZNF396 252884  | B2 |
| ZNF398 57541   | B2 |
| ZNF3 7551      | B2 |
| ZNF404 342908  | B2 |
| ZNF408 79797   | B2 |
| ZNF414 84330   | B2 |
| ZNF415 55786   | B2 |
| ZNF416 55659   | B2 |
| ZNF417 147687  | B2 |
| ZNF418 147686  | B2 |
| ZNF419 79744   | B2 |
| ZNF41 7592     | B2 |
| ZNF420 147923  | B2 |
| ZNF425 155054  | B2 |
| ZNF428 126299  | B2 |
| ZNF429 353088  | B2 |

|               |    |
|---------------|----|
| ZNF430 80264  | B2 |
| ZNF431 170959 | B2 |
| ZNF432 9668   | B2 |
| ZNF433 163059 | B2 |
| ZNF436 80818  | B2 |
| ZNF439 90594  | B2 |
| ZNF440 126070 | B2 |
| ZNF441 126068 | B2 |
| ZNF442 79973  | B2 |
| ZNF445 353274 | B2 |
| ZNF446 55663  | B2 |
| ZNF44 51710   | B2 |
| ZNF451 26036  | B2 |
| ZNF45 7596    | B2 |
| ZNF460 10794  | B2 |
| ZNF461 92283  | B2 |
| ZNF473 25888  | B2 |
| ZNF474 133923 | B2 |
| ZNF479 90827  | B2 |
| ZNF484 83744  | B2 |
| ZNF485 220992 | B2 |
| ZNF486 90649  | B2 |
| ZNF491 126069 | B2 |
| ZNF492 57615  | B2 |
| ZNF493 284443 | B2 |
| ZNF496 84838  | B2 |
| ZNF497 162968 | B2 |
| ZNF500 26048  | B2 |
| ZNF503 84858  | B2 |
| ZNF506 440515 | B2 |
| ZNF511 118472 | B2 |
| ZNF512B 57473 | B2 |
| ZNF512 84450  | B2 |
| ZNF513 130557 | B2 |
| ZNF514 84874  | B2 |
| ZNF516 9658   | B2 |
| ZNF517 340385 | B2 |
| ZNF518A 9849  | B2 |
| ZNF518B 85460 | B2 |
| ZNF519 162655 | B2 |
| ZNF524 147807 | B2 |
| ZNF526 116115 | B2 |
| ZNF528 84436  | B2 |
| ZNF529 57711  | B2 |
| ZNF530 348327 | B2 |
| ZNF532 55205  | B2 |
| ZNF534 147658 | B2 |
| ZNF536 9745   | B2 |
| ZNF541 84215  | B2 |
| ZNF542 147947 | B2 |
| ZNF543 125919 | B2 |

|                  |    |
|------------------|----|
| ZNF547 284306    | B2 |
| ZNF548 147694    | B2 |
| ZNF549 256051    | B2 |
| ZNF550 162972    | B2 |
| ZNF551 90233     | B2 |
| ZNF555 148254    | B2 |
| ZNF556 80032     | B2 |
| ZNF557 79230     | B2 |
| ZNF558 148156    | B2 |
| ZNF560 147741    | B2 |
| ZNF562 54811     | B2 |
| ZNF563 147837    | B2 |
| ZNF564 163050    | B2 |
| ZNF565 147929    | B2 |
| ZNF566 84924     | B2 |
| ZNF567 163081    | B2 |
| ZNF568 374900    | B2 |
| ZNF569 148266    | B2 |
| ZNF570 148268    | B2 |
| ZNF571 51276     | B2 |
| ZNF572 137209    | B2 |
| ZNF573 126231    | B2 |
| ZNF574 64763     | B2 |
| ZNF575 284346    | B2 |
| ZNF576 79177     | B2 |
| ZNF577 84765     | B2 |
| ZNF578 147660    | B2 |
| ZNF579 163033    | B2 |
| ZNF57 126295     | B2 |
| ZNF580 51157     | B2 |
| ZNF581 51545     | B2 |
| ZNF582 147948    | B2 |
| ZNF583 147949    | B2 |
| ZNF584 201514    | B2 |
| ZNF585A 199704   | B2 |
| ZNF585B 92285    | B2 |
| ZNF586 54807     | B2 |
| ZNF593 51042     | B2 |
| ZNF594 84622     | B2 |
| ZNF595 152687    | B2 |
| ZNF597 146434    | B2 |
| ZNF599 148103    | B2 |
| ZNF600 162966    | B2 |
| ZNF605 100289635 | B2 |
| ZNF606 80095     | B2 |
| ZNF607 84775     | B2 |
| ZNF609 23060     | B2 |
| ZNF610 162963    | B2 |
| ZNF611 81856     | B2 |
| ZNF613 79898     | B2 |
| ZNF614 80110     | B2 |

|                |    |
|----------------|----|
| ZNF615 284370  | B2 |
| ZNF616 90317   | B2 |
| ZNF618 114991  | B2 |
| ZNF619 285267  | B2 |
| ZNF620 253639  | B2 |
| ZNF621 285268  | B2 |
| ZNF622 90441   | B2 |
| ZNF624 57547   | B2 |
| ZNF625 90589   | B2 |
| ZNF626 199777  | B2 |
| ZNF627 199692  | B2 |
| ZNF628 89887   | B2 |
| ZNF629 23361   | B2 |
| ZNF630 57232   | B2 |
| ZNF638 27332   | B2 |
| ZNF639 51193   | B2 |
| ZNF641 121274  | B2 |
| ZNF644 84146   | B2 |
| ZNF645 158506  | B2 |
| ZNF648 127665  | B2 |
| ZNF649 65251   | B2 |
| ZNF652 22834   | B2 |
| ZNF653 115950  | B2 |
| ZNF654 55279   | B2 |
| ZNF664 144348  | B2 |
| ZNF665 79788   | B2 |
| ZNF669 79862   | B2 |
| ZNF670 93474   | B2 |
| ZNF671 79891   | B2 |
| ZNF674 641339  | B2 |
| ZNF676 163223  | B2 |
| ZNF679 168417  | B2 |
| ZNF680 340252  | B2 |
| ZNF683 257101  | B2 |
| ZNF684 127396  | B2 |
| ZNF688 146542  | B2 |
| ZNF689 115509  | B2 |
| ZNF691 51058   | B2 |
| ZNF692 55657   | B2 |
| ZNF696 79943   | B2 |
| ZNF697 90874   | B2 |
| ZNF69 7620     | B2 |
| ZNF700 90592   | B2 |
| ZNF701 55762   | B2 |
| ZNF702P 79986  | B2 |
| ZNF703 80139   | B2 |
| ZNF705A 440077 | B2 |
| ZNF705D 728957 | B2 |
| ZNF706 51123   | B2 |
| ZNF708 7562    | B2 |
| ZNF709 163051  | B2 |

|                  |    |
|------------------|----|
| ZNF70 7621       | B2 |
| ZNF710 374655    | B2 |
| ZNF711 7552      | B2 |
| ZNF713 349075    | B2 |
| ZNF714 148206    | B2 |
| ZNF716 441234    | B2 |
| ZNF717 100131827 | B2 |
| ZNF718 255403    | B2 |
| ZNF71 58491      | B2 |
| ZNF720 124411    | B2 |
| ZNF721 170960    | B2 |
| ZNF732 654254    | B2 |
| ZNF737 100129842 | B2 |
| ZNF738 148203    | B2 |
| ZNF740 283337    | B2 |
| ZNF746 155061    | B2 |
| ZNF747 65988     | B2 |
| ZNF749 388567    | B2 |
| ZNF74 7625       | B2 |
| ZNF750 79755     | B2 |
| ZNF75D 7626      | B2 |
| ZNF761 388561    | B2 |
| ZNF763 284390    | B2 |
| ZNF766 90321     | B2 |
| ZNF76 7629       | B2 |
| ZNF770 54989     | B2 |
| ZNF772 400720    | B2 |
| ZNF773 374928    | B2 |
| ZNF774 342132    | B2 |
| ZNF775 285971    | B2 |
| ZNF776 284309    | B2 |
| ZNF777 27153     | B2 |
| ZNF77 58492      | B2 |
| ZNF780A 284323   | B2 |
| ZNF780B 163131   | B2 |
| ZNF782 158431    | B2 |
| ZNF784 147808    | B2 |
| ZNF785 146540    | B2 |
| ZNF786 136051    | B2 |
| ZNF787 126208    | B2 |
| ZNF788 388507    | B2 |
| ZNF789 285989    | B2 |
| ZNF790 388536    | B2 |
| ZNF791 163049    | B2 |
| ZNF792 126375    | B2 |
| ZNF793 390927    | B2 |
| ZNF799 90576     | B2 |
| ZNF79 7633       | B2 |
| ZNF7 7553        | B2 |
| ZNF800 168850    | B2 |
| ZNF804A 91752    | B2 |

|                |    |
|----------------|----|
| ZNF804B 219578 | B2 |
| ZNF805 390980  | B2 |
| ZNF808 388558  | B2 |
| ZNF80 7634     | B2 |
| ZNF813 126017  | B2 |
| ZNF814 730051  | B2 |
| ZNF815 401303  | B2 |
| ZNF816A 125893 | B2 |
| ZNF81 347344   | B2 |
| ZNF821 55565   | B2 |
| ZNF823 55552   | B2 |
| ZNF826 664701  | B2 |
| ZNF827 152485  | B2 |
| ZNF828 283489  | B2 |
| ZNF829 374899  | B2 |
| ZNF830 91603   | B2 |
| ZNF831 128611  | B2 |
| ZNF835 90485   | B2 |
| ZNF836 162962  | B2 |
| ZNF837 116412  | B2 |
| ZNF839 55778   | B2 |
| ZNF83 55769    | B2 |
| ZNF841 284371  | B2 |
| ZNF844 284391  | B2 |
| ZNF845 91664   | B2 |
| ZNF846 162993  | B2 |
| ZNF84 7637     | B2 |
| ZNF860 344787  | B2 |
| ZNF862 643641  | B2 |
| ZNF876P 642280 | B2 |
| ZNF878 729747  | B2 |
| ZNF879 345462  | B2 |
| ZNF880 400713  | B2 |
| ZNF883 169834  | B2 |
| ZNF8 7554      | B2 |
| ZNF90 7643     | B2 |
| ZNF91 7644     | B2 |
| ZNF92 168374   | B2 |
| ZNF98 148198   | B2 |
| ZNF99 7652     | B2 |
| ZNFX1 57169    | B2 |
| ZNHIT1 10467   | B2 |
| ZNHIT3 9326    | B2 |
| ZNHIT6 54680   | B2 |
| ZNRD1 30834    | B2 |
| ZNRF1 84937    | B2 |
| ZNRF3 84133    | B2 |
| ZP1 22917      | B2 |
| ZP2 7783       | B2 |
| ZP3 7784       | B2 |
| ZP4 57829      | B2 |

|                  |    |
|------------------|----|
| ZPBP2 124626     | B2 |
| ZPBP 11055       | B2 |
| ZPLD1 131368     | B2 |
| ZRANB3 84083     | B2 |
| ZRSR2 8233       | B2 |
| ZSCAN10 84891    | B2 |
| ZSCAN18 65982    | B2 |
| ZSCAN1 284312    | B2 |
| ZSCAN20 7579     | B2 |
| ZSCAN21 7589     | B2 |
| ZSCAN22 342945   | B2 |
| ZSCAN29 146050   | B2 |
| ZSCAN2 54993     | B2 |
| ZSCAN4 201516    | B2 |
| ZSCAN5A 79149    | B2 |
| ZSCAN5B 342933   | B2 |
| ZSWIM1 90204     | B2 |
| ZSWIM2 151112    | B2 |
| ZSWIM3 140831    | B2 |
| ZSWIM4 65249     | B2 |
| ZSWIM5 57643     | B2 |
| ZSWIM6 57688     | B2 |
| ZUFSP 221302     | B2 |
| ZW10 9183        | B2 |
| ZXDA 7789        | B2 |
| ZXDB 158586      | B2 |
| ZXDC 79364       | B2 |
| ZYG11B 79699     | B2 |
| ZYX 7791         | B2 |
| ZZZ3 26009       | B2 |
| tAKR 389932      | B2 |
| ACOT9 23597      | B3 |
| ACR 49           | B3 |
| ADH6 130         | B3 |
| AXL 558          | B3 |
| BCHE 590         | B3 |
| BRWD3 254065     | B3 |
| C10orf108 414235 | B3 |
| C11orf53 341032  | B3 |
| C1QTNF2 114898   | B3 |
| C1S 716          | B3 |
| C21orf62 56245   | B3 |
| CCDC92 80212     | B3 |
| CLEC2L 154790    | B3 |
| CLEC4F 165530    | B3 |
| COL15A1 1306     | B3 |
| CPS1 1373        | B3 |
| CRTAC1 55118     | B3 |
| DPP4 1803        | B3 |
| DZIP1 22873      | B3 |
| EIF1 10209       | B3 |

|                  |    |
|------------------|----|
| ELMO1 9844       | B3 |
| FAM127A 8933     | B3 |
| FGD5 152273      | B3 |
| FGF10 2255       | B3 |
| FKBP1B 2281      | B3 |
| FXVD2 486        | B3 |
| GABRA2 2555      | B3 |
| GLI1 2735        | B3 |
| GPER 2852        | B3 |
| HIBADH 11112     | B3 |
| HMGCR 3156       | B3 |
| HSPB11 51668     | B3 |
| IGF2 3481        | B3 |
| ILK 3611         | B3 |
| ITGB1 3688       | B3 |
| JDP2 122953      | B3 |
| LOC158696 158696 | B3 |
| LOC348926 348926 | B3 |
| LOC400804 400804 | B3 |
| MAGEE2 139599    | B3 |
| MAP1A 4130       | B3 |
| METTL6 131965    | B3 |
| MFAP5 8076       | B3 |
| MPZ 4359         | B3 |
| NAA35 60560      | B3 |
| NNMT 4837        | B3 |
| NTRK3 4916       | B3 |
| PKIG 11142       | B3 |
| PLS1 5357        | B3 |
| PPP1R1B 84152    | B3 |
| PRMT2 3275       | B3 |
| RAB3IL1 5866     | B3 |
| RFFL 117584      | B3 |
| RGS5 8490        | B3 |
| RPP30 10556      | B3 |
| S100B 6285       | B3 |
| SAMD10 140700    | B3 |
| SEPT4 5414       | B3 |
| SGTB 54557       | B3 |
| SHOX2 6474       | B3 |
| SNHG5 387066     | B3 |
| STX2 2054        | B3 |
| SULT1C4 27233    | B3 |
| THOC2 57187      | B3 |
| TSPAN18 90139    | B3 |
| UVRAG 7405       | B3 |
| XKR6 286046      | B3 |
| ZNF208 7757      | B3 |
| psiTPTE22 387590 | B3 |
| AJAP1 55966      | B4 |
| AKAP6 9472       | B4 |



|                  |    |
|------------------|----|
| C6orf105 84830   | B4 |
| CASP1 834        | B4 |
| CCDC68 80323     | B4 |
| CEP164 22897     | B4 |
| DIRC2 84925      | B4 |
| FLJ39582 439931  | B4 |
| GPR62 118442     | B4 |
| GRIN2D 2906      | B4 |
| KIAA0913 23053   | B4 |
| LOC284276 284276 | B4 |
| LOC401127 401127 | B4 |
| MARCH4 57574     | B4 |
| MLLT6 4302       | B4 |
| NEUROG2 63973    | B4 |
| NKPD1 284353     | B4 |
| NMNAT3 349565    | B4 |
| NPAS3 64067      | B4 |
| SEMA6C 10500     | B4 |
| SF1 7536         | B4 |
| STAU1 6780       | B4 |
| SYNPO2 171024    | B4 |
| TMEM79 84283     | B4 |
| TPTE2P3 220115   | B4 |
| WSCD2 9671       | B4 |
| ZFYVE28 57732    | B4 |
| ZNF487 642819    | B4 |
| ZNF589 51385     | B4 |
| AMIGO2 347902    | B5 |
| BRMS1L 84312     | B5 |
| C11orf31 280636  | B5 |
| C11orf93 120376  | B5 |
| CA11 770         | B5 |
| CDK6 1021        | B5 |
| CSDAP1 440359    | B5 |
| CSDA 8531        | B5 |
| CYP20A1 57404    | B5 |
| CYP39A1 51302    | B5 |
| DCHS2 54798      | B5 |
| DISC1 27185      | B5 |
| GNAQ 2776        | B5 |
| IGF2BP2 10644    | B5 |
| LPPR5 163404     | B5 |
| MAP2 4133        | B5 |
| OCA2 4948        | B5 |
| SMOC1 64093      | B5 |
| CAPN3 825        | B6 |
| CLCA4 22802      | B6 |
| GLT25D2 23127    | B6 |
| JPH2 57158       | B6 |
| LOC285419 285419 | B6 |
| MYH3 4621        | B6 |

|                |    |
|----------------|----|
| MYH7B 57644    | B6 |
| PLP1 5354      | B6 |
| TPM3 7170      | B6 |
| ALPL 249       | B7 |
| CHST2 9435     | B7 |
| KCTD14 65987   | B7 |
| KSR1 8844      | B7 |
| MRAP2 112609   | B7 |
| NAV3 89795     | B7 |
| PLA2G4A 5321   | B7 |
| TUBB2B 347733  | B7 |
| ANKRD35 148741 | B8 |
| ASXL3 80816    | B8 |
| SEC1 653677    | B8 |
