# Supplementary material for: Classification of Genes Based on Age-Related Differential Expression in Breast Cancer
Source: PubMed Central journal article supplement — Genomics Inform. 2017 Dec 29;15(4):156–61. doi: 10.5808/GI.2017.15.4.156 (PMC5769863; doi:10.5808/gi.2017.15.4.156), 2017-12-29
Supplement: gi-15-4-156-suppl2.pdf [file gi-15-4-156-suppl2.pdf]

**Supplementary Table 2.** Functional enrichment analysis for each class by ToppGene

|    | Category                  | ID         | Name                                             | p.value  | q.value.B<br>onferroni | q.value.F<br>DR.B.H | q.value.F<br>DR.B.Y | Hit.Count.<br>in.Query.<br>List | Hit.Count.<br>in.Genom<br>e |
|----|---------------------------|------------|--------------------------------------------------|----------|------------------------|---------------------|---------------------|---------------------------------|-----------------------------|
| A3 | GO: Molecular<br>Function | GO:0008201 | Heparin binding                                  | 2.50E-06 | 3.64E-03               | 3.64E-03            | 2.87E-02            | 21                              | 167                         |
| A3 | GO: Biological<br>Process | GO:0048514 | Blood vessel morphogenesis                       | 1.51E-08 | 9.00E-05               | 7.40E-05            | 6.86E-04            | 51                              | 551                         |
| A3 | GO: Biological<br>Process | GO:0001944 | Vasculature development                          | 2.48E-08 | 1.48E-04               | 7.40E-05            | 6.86E-04            | 58                              | 677                         |
| A3 | GO: Biological<br>Process | GO:0001568 | Blood vessel development                         | 3.80E-08 | 2.27E-04               | 7.56E-05            | 7.00E-04            | 56                              | 651                         |
| A3 | GO: Biological<br>Process | GO:0001525 | Angiogenesis                                     | 7.52E-08 | 4.49E-04               | 1.12E-04            | 1.04E-03            | 44                              | 464                         |
| A3 | GO: Biological<br>Process | GO:0072359 | Circulatory system development                   | 2.85E-07 | 1.70E-03               | 2.83E-04            | 2.63E-03            | 76                              | 1,058                       |
| A3 | GO: Biological<br>Process | GO:0072358 | Cardiovascular system development                | 2.85E-07 | 1.70E-03               | 2.83E-04            | 2.63E-03            | 76                              | 1,058                       |
| A3 | GO: Biological<br>Process | GO:0022610 | Biological adhesion                              | 4.66E-07 | 2.78E-03               | 3.97E-04            | 3.68E-03            | 100                             | 1,542                       |
| A3 | GO: Biological<br>Process | GO:0007155 | Cell adhesion                                    | 5.94E-07 | 3.54E-03               | 4.42E-04            | 4.10E-03            | 99                              | 1,530                       |
| A3 | GO: Biological<br>Process | GO:0045765 | Regulation of angiogenesis                       | 9.39E-07 | 5.60E-03               | 6.22E-04            | 5.77E-03            | 27                              | 239                         |
| A3 | GO: Biological<br>Process | GO:0072659 | Protein localization to plasma membrane          | 3.19E-06 | 1.90E-02               | 1.77E-03            | 1.64E-02            | 25                              | 225                         |
| A3 | GO: Biological<br>Process | GO:0022603 | Regulation of anatomical structure morphogenesis | 3.26E-06 | 1.94E-02               | 1.77E-03            | 1.64E-02            | 76                              | 1,128                       |
| A3 | GO: Biological<br>Process | GO:1990778 | Protein localization to cell periphery           | 3.74E-06 | 2.23E-02               | 1.86E-03            | 1.72E-02            | 25                              | 227                         |
| A3 | GO: Biological<br>Process | GO:0031589 | Cell-substrate adhesion                          | 4.68E-06 | 2.79E-02               | 2.15E-03            | 1.99E-02            | 31                              | 322                         |
| A3 | GO: Biological<br>Process | GO:0006261 | DNA-dependent DNA replication                    | 5.51E-06 | 3.29E-02               | 2.35E-03            | 2.18E-02            | 18                              | 134                         |
| A3 | GO: Biological<br>Process | GO:1901342 | Regulation of vasculature development            | 6.31E-06 | 3.76E-02               | 2.51E-03            | 2.32E-02            | 27                              | 264                         |
| A3 | GO: Biological<br>Process | GO:2000351 | Regulation of endothelial cell apoptotic process | 7.86E-06 | 4.68E-02               | 2.93E-03            | 2.71E-02            | 10                              | 45                          |
| A3 | GO: Cellular<br>Component | GO:0005811 | Lipid droplet                                    | 3.43E-08 | 2.27E-05               | 2.27E-05            | 1.60E-04            | 15                              | 67                          |
| A3 | GO: Cellular<br>Component | GO:0005912 | Adherens junction                                | 1.92E-07 | 1.27E-04               | 6.35E-05            | 4.49E-04            | 44                              | 484                         |
| A3 | GO: Cellular<br>Component | GO:0070161 | Anchoring junction                               | 5.60E-07 | 3.69E-04               | 1.23E-04            | 8.70E-04            | 44                              | 503                         |
| A3 | GO: Cellular<br>Component | GO:0005924 | Cell-substrate adherens junction                 | 1.06E-06 | 7.03E-04               | 1.76E-04            | 1.24E-03            | 37                              | 398                         |
| A3 | GO: Cellular<br>Component | GO:0030055 | Cell-substrate junction                          | 1.44E-06 | 9.47E-04               | 1.89E-04            | 1.34E-03            | 37                              | 403                         |

|    |                        |            |                                                                                                                                                                  |          |          |          |          |    |       |
|----|------------------------|------------|------------------------------------------------------------------------------------------------------------------------------------------------------------------|----------|----------|----------|----------|----|-------|
| A3 | GO: Cellular Component | GO:0005925 | Focal adhesion                                                                                                                                                   | 2.10E-06 | 1.38E-03 | 2.31E-04 | 1.63E-03 | 36 | 393   |
| A3 | GO: Cellular Component | GO:0030054 | Cell junction                                                                                                                                                    | 3.68E-05 | 2.43E-02 | 3.47E-03 | 2.45E-02 | 75 | 1,200 |
| A3 | Mouse Phenotype        | MP:0005666 | Abnormal adipose tissue physiology                                                                                                                               | 7.74E-07 | 3.71E-03 | 3.71E-03 | 3.35E-02 | 19 | 111   |
| A3 | Mouse Phenotype        | MP:0001614 | Abnormal blood vessel morphology                                                                                                                                 | 1.96E-06 | 9.39E-03 | 4.70E-03 | 4.25E-02 | 92 | 1,233 |
| A3 | Pubmed                 | 23376485   | Proteomic analysis of podocyte exosome-enriched fraction from normal human urine.                                                                                | 2.77E-27 | 1.03E-22 | 1.03E-22 | 1.14E-21 | 94 | 1,743 |
| A3 | Pubmed                 | 17081983   | Global, in vivo, and site-specific phosphorylation dynamics in signaling networks.                                                                               | 1.53E-26 | 5.67E-22 | 2.83E-22 | 3.14E-21 | 87 | 1,546 |
| A3 | Pubmed                 | 26638075   | A dynamic protein interaction landscape of the human centrosome-cilium interface.                                                                                | 4.04E-24 | 1.49E-19 | 4.98E-20 | 5.52E-19 | 91 | 1,820 |
| A3 | Pubmed                 | 19322201   | Ubiquitin-mediated proteolysis of HuR by heat shock.                                                                                                             | 4.99E-23 | 1.85E-18 | 4.62E-19 | 5.12E-18 | 85 | 1,672 |
| A3 | Pubmed                 | 25921289   | Temporal proteomics of NGF-TrkA signaling identifies an inhibitory role for the E3 ligase Cbl-b in neuroblastoma cell differentiation.                           | 1.67E-22 | 6.18E-18 | 1.24E-18 | 1.37E-17 | 91 | 1,922 |
| A3 | Pubmed                 | 22863883   | A high-throughput approach for measuring temporal changes in the interactome.                                                                                    | 2.50E-21 | 9.26E-17 | 1.54E-17 | 1.71E-16 | 76 | 1,456 |
| A3 | Pubmed                 | 16169070   | A human protein-protein interaction network: a resource for annotating the proteome.                                                                             | 4.28E-21 | 1.59E-16 | 2.26E-17 | 2.51E-16 | 82 | 1,683 |
| A3 | Pubmed                 | 21832049   | Interactions of pathological hallmark proteins: tubulin polymerization promoting protein/p25, beta-amyloid, and alpha-synuclein.                                 | 3.42E-20 | 1.26E-15 | 1.58E-16 | 1.75E-15 | 86 | 1,891 |
| A3 | Pubmed                 | 26673895   | A deep proteomics perspective on CRM1-mediated nuclear export and nucleocytoplasmic partitioning.                                                                | 4.34E-19 | 1.61E-14 | 1.79E-15 | 1.98E-14 | 60 | 1,039 |
| A3 | Pubmed                 | 20467437   | Direct interaction between hnRNP-M and CDC5L/PLRG1 proteins affects alternative splice site choice.                                                              | 4.43E-17 | 1.64E-12 | 1.64E-13 | 1.82E-12 | 42 | 581   |
| A3 | Pubmed                 | 12975309   | The Secreted Protein Discovery Initiative (SPDI), a large-scale effort to identify novel human secreted and transmembrane proteins: a bioinformatics assessment. | 6.42E-17 | 2.38E-12 | 2.16E-13 | 2.40E-12 | 55 | 987   |
| A3 | Pubmed                 | 24711643   | Identifying biological pathways that underlie primordial short stature using network analysis.                                                                   | 7.53E-17 | 2.79E-12 | 2.32E-13 | 2.58E-12 | 56 | 1,024 |
| A3 | Pubmed                 | 21900206   | A directed protein interaction network for investigating intracellular signal transduction.                                                                      | 2.65E-16 | 9.81E-12 | 7.55E-13 | 8.38E-12 | 58 | 1,123 |
| A3 | Pubmed                 | 16189514   | Towards a proteome-scale map of the human protein-protein interaction network.                                                                                   | 4.12E-16 | 1.52E-11 | 1.09E-12 | 1.21E-11 | 70 | 1,573 |
| A3 | Pubmed                 | 23533145   | In-depth proteomic analyses of exosomes isolated from expressed prostatic secretions in urine.                                                                   | 1.82E-15 | 6.74E-11 | 4.49E-12 | 4.98E-11 | 55 | 1,068 |
| A3 | Pubmed                 | 27880917   | Phenotypic and Interaction Profiling of the Human Phosphatases Identifies Diverse Mitotic Regulators.                                                            | 3.50E-15 | 1.30E-10 | 8.10E-12 | 8.98E-11 | 54 | 1,050 |
| A3 | Pubmed                 | 19056867   | Large-scale proteomics and phosphoproteomics of urinary exosomes.                                                                                                | 3.73E-15 | 1.38E-10 | 8.12E-12 | 9.00E-11 | 53 | 1,017 |
| A3 | Pubmed                 | 8125298    | Oligo-capping: a simple method to replace the cap structure of eukaryotic mRNAs with oligoribonucleotides.                                                       | 3.19E-14 | 1.18E-09 | 6.56E-11 | 7.28E-10 | 74 | 1,881 |
| A3 | Pubmed                 | 19946888   | Defining the membrane proteome of NK cells.                                                                                                                      | 6.69E-14 | 2.48E-09 | 1.30E-10 | 1.45E-09 | 55 | 1,166 |
| A3 | Pubmed                 | 16335952   | Human plasma N-glycoproteome analysis by                                                                                                                         | 1.51E-13 | 5.58E-09 | 2.79E-10 | 3.10E-09 | 25 | 257   |

|    |        |          |                                                                                                                                                    |          |          |          |          |    |       |
|----|--------|----------|----------------------------------------------------------------------------------------------------------------------------------------------------|----------|----------|----------|----------|----|-------|
|    |        |          | immunoaffinity subtraction, hydrazide chemistry, and mass spectrometry.                                                                            |          |          |          |          |    |       |
| A3 | Pubmed | 27068509 | Extracellular matrix remodelling in response to venous hypertension: proteomics of human varicose veins.                                           | 7.04E-13 | 2.60E-08 | 1.24E-09 | 1.38E-08 | 19 | 146   |
| A3 | Pubmed | 17353931 | Large-scale mapping of human protein-protein interactions by mass spectrometry.                                                                    | 9.26E-13 | 3.43E-08 | 1.56E-09 | 1.73E-08 | 56 | 1,284 |
| A3 | Pubmed | 21423176 | Analysis of the myosin-II-responsive focal adhesion proteome reveals a role for $\alpha$ -Pix in negative regulation of focal adhesion maturation. | 1.66E-12 | 6.15E-08 | 2.67E-09 | 2.97E-08 | 25 | 286   |
| A3 | Pubmed | 15146197 | Transcriptome characterization elucidates signaling networks that control human ES cell growth and differentiation.                                | 2.22E-12 | 8.23E-08 | 3.43E-09 | 3.81E-08 | 50 | 1,085 |
| A3 | Pubmed | 15342556 | Sequence comparison of human and mouse genes reveals a homologous block structure in the promoter regions.                                         | 2.63E-12 | 9.73E-08 | 3.89E-09 | 4.32E-08 | 52 | 1165  |
| A3 | Pubmed | 15302935 | Large-scale characterization of HeLa cell nuclear phosphoproteins.                                                                                 | 3.00E-12 | 1.11E-07 | 4.27E-09 | 4.74E-08 | 41 | 773   |
| A3 | Pubmed | 27173435 | An organelle-specific protein landscape identifies novel diseases and molecular mechanisms.                                                        | 8.87E-12 | 3.28E-07 | 1.22E-08 | 1.35E-07 | 55 | 1,321 |
| A3 | Pubmed | 21145461 | Dynamics of cullin-RING ubiquitin ligase network revealed by systematic quantitative proteomics.                                                   | 3.30E-11 | 1.22E-06 | 4.30E-08 | 4.77E-07 | 63 | 1,698 |
| A3 | Pubmed | 25468996 | E-cadherin interactome complexity and robustness resolved by quantitative proteomics.                                                              | 3.37E-11 | 1.25E-06 | 4.30E-08 | 4.77E-07 | 33 | 565   |
| A3 | Pubmed | 21516116 | Next-generation sequencing to generate interactome datasets.                                                                                       | 5.22E-11 | 1.93E-06 | 6.43E-08 | 7.14E-07 | 49 | 1,147 |
| A3 | Pubmed | 19738201 | Proteomic analysis of integrin-associated complexes identifies RCC2 as a dual regulator of Rac1 and Arf6.                                          | 2.04E-10 | 7.55E-06 | 2.44E-07 | 2.70E-06 | 36 | 708   |
| A3 | Pubmed | 23251661 | Novel genetic loci identified for the pathophysiology of childhood obesity in the Hispanic population.                                             | 2.24E-10 | 8.28E-06 | 2.59E-07 | 2.87E-06 | 39 | 817   |
| A3 | Pubmed | 16710414 | The DNA sequence and biological annotation of human chromosome 1.                                                                                  | 5.77E-10 | 2.14E-05 | 6.47E-07 | 7.18E-06 | 44 | 1,034 |
| A3 | Pubmed | 20360068 | Systematic analysis of human protein complexes identifies chromosome segregation proteins.                                                         | 1.16E-09 | 4.30E-05 | 1.27E-06 | 1.40E-05 | 51 | 1,341 |
| A3 | Pubmed | 15231748 | Functional proteomics mapping of a human signaling pathway.                                                                                        | 1.78E-09 | 6.57E-05 | 1.88E-06 | 2.08E-05 | 31 | 591   |
| A3 | Pubmed | 25852190 | Integrative analysis of kinase networks in TRAIL-induced apoptosis provides a source of potential targets for combination therapy.                 | 2.18E-09 | 8.08E-05 | 2.25E-06 | 2.49E-05 | 25 | 401   |
| A3 | Pubmed | 27559042 | Glycoproteomics Reveals Decorin Peptides With Anti-Myostatin Activity in Human Atrial Fibrillation.                                                | 2.68E-09 | 9.93E-05 | 2.68E-06 | 2.98E-05 | 13 | 99    |
| A3 | Pubmed | 16964243 | A probability-based approach for high-throughput protein phosphorylation analysis and site localization.                                           | 3.00E-09 | 1.11E-04 | 2.91E-06 | 3.23E-05 | 28 | 503   |
| A3 | Pubmed | 20551380 | Proteomics characterization of extracellular space components in the human aorta.                                                                  | 3.45E-09 | 1.28E-04 | 3.27E-06 | 3.63E-05 | 13 | 101   |
| A3 | Pubmed | 16381901 | The LIFEdb database in 2006.                                                                                                                       | 4.21E-09 | 1.56E-04 | 3.84E-06 | 4.26E-05 | 34 | 720   |
| A3 | Pubmed | 11076863 | DNA cloning using in vitro site-specific recombination.                                                                                            | 4.26E-09 | 1.58E-04 | 3.84E-06 | 4.26E-05 | 36 | 794   |
| A3 | Pubmed | 15489336 | From ORFeome to biology: a functional genomics pipeline.                                                                                           | 4.51E-09 | 1.67E-04 | 3.97E-06 | 4.41E-05 | 34 | 722   |
| A3 | Pubmed | 25609649 | Proteomic analyses reveal distinct chromatin-associated and soluble transcription factor complexes.                                                | 8.06E-09 | 2.98E-04 | 6.94E-06 | 7.70E-05 | 37 | 852   |

|    |        |          |                                                                                                                                                                                        |          |          |          |          |    |       |
|----|--------|----------|----------------------------------------------------------------------------------------------------------------------------------------------------------------------------------------|----------|----------|----------|----------|----|-------|
| A3 | Pubmed | 19615732 | Defining the human deubiquitinating enzyme interaction landscape.                                                                                                                      | 2.20E-08 | 8.14E-04 | 1.85E-05 | 2.05E-04 | 40 | 1,005 |
| A3 | Pubmed | 15242332 | Vectorial proteomics reveal targeting, phosphorylation and specific fragmentation of polymerase I and transcript release factor (PTRF) at the surface of caveolae in human adipocytes. | 2.92E-08 | 1.08E-03 | 2.40E-05 | 2.66E-04 | 7  | 23    |
| A3 | Pubmed | 20734064 | A large-scale candidate gene association study of age at menarche and age at natural menopause.                                                                                        | 3.63E-08 | 1.34E-03 | 2.92E-05 | 3.24E-04 | 19 | 275   |
| A3 | Pubmed | 20589320 | mRNA levels of CD31, CD144, CD146 and von Willebrand factor do not serve as surrogate markers for circulating endothelial cells.                                                       | 4.74E-08 | 1.75E-03 | 3.68E-05 | 4.08E-04 | 4  | 4     |
| A3 | Pubmed | 20628624 | Evaluation of candidate stromal epithelial cross-talk genes identifies association between risk of serous ovarian cancer and TERT, a cancer susceptibility "hot-spot".                 | 4.78E-08 | 1.77E-03 | 3.68E-05 | 4.08E-04 | 15 | 172   |
| A3 | Pubmed | 24332808 | PRP19 transforms into a sensor of RPA-ssDNA after DNA damage and drives ATR activation via a ubiquitin-mediated circuitry.                                                             | 4.87E-08 | 1.80E-03 | 3.68E-05 | 4.08E-04 | 21 | 340   |
| A3 | Pubmed | 22681889 | The mRNA-bound proteome and its global occupancy profile on protein-coding transcripts.                                                                                                | 6.29E-08 | 2.33E-03 | 4.58E-05 | 5.09E-04 | 34 | 805   |
| A3 | Pubmed | 15815621 | Generation and annotation of the DNA sequences of human chromosomes 2 and 4.                                                                                                           | 6.32E-08 | 2.34E-03 | 4.58E-05 | 5.09E-04 | 24 | 442   |
| A3 | Pubmed | 24255178 | Protein interaction network of the mammalian Hippo pathway reveals mechanisms of kinase-phosphatase interactions.                                                                      | 7.47E-08 | 2.76E-03 | 5.26E-05 | 5.84E-04 | 24 | 446   |
| A3 | Pubmed | 23383273 | VCP phosphorylation-dependent interaction partners prevent apoptosis in Helicobacter pylori-infected gastric epithelial cells.                                                         | 7.54E-08 | 2.79E-03 | 5.26E-05 | 5.84E-04 | 19 | 288   |
| A3 | Pubmed | 22446626 | DBIRD complex integrates alternative mRNA splicing with RNA polymerase II transcript elongation.                                                                                       | 8.48E-08 | 3.14E-03 | 5.81E-05 | 6.45E-04 | 11 | 89    |
| A3 | Pubmed | 17207965 | hORFeome v3.1: a resource of human open reading frames representing over 10,000 human genes.                                                                                           | 9.49E-08 | 3.51E-03 | 6.39E-05 | 7.09E-04 | 54 | 1,674 |
| A3 | Pubmed | 28065597 | A Global Analysis of the Receptor Tyrosine Kinase-Protein Phosphatase Interactome.                                                                                                     | 9.75E-08 | 3.61E-03 | 6.44E-05 | 7.15E-04 | 23 | 419   |
| A3 | Pubmed | 12107410 | Expressed sequence tag analysis of human RPE/choroid for the NEIBank Project: over 6000 non-redundant transcripts, novel genes, and splice variants.                                   | 9.97E-08 | 3.69E-03 | 6.48E-05 | 7.19E-04 | 12 | 111   |
| A3 | Pubmed | 26167880 | SR protein kinases promote splicing of nonconsensus introns.                                                                                                                           | 1.34E-07 | 4.94E-03 | 8.52E-05 | 9.46E-04 | 21 | 361   |
| A3 | Pubmed | 17474147 | Systematic identification of SH3 domain-mediated human protein-protein interactions by peptide array target screening.                                                                 | 1.37E-07 | 5.08E-03 | 8.61E-05 | 9.55E-04 | 20 | 330   |
| A3 | Pubmed | 20634891 | Maternal genes and facial clefts in offspring: a comprehensive search for genetic associations in two population-based cleft studies from Scandinavia.                                 | 1.44E-07 | 5.33E-03 | 8.88E-05 | 9.86E-04 | 20 | 331   |
| A3 | Pubmed | 22113938 | A bead-based approach for large-scale identification of in vitro kinase substrates.                                                                                                    | 1.61E-07 | 5.96E-03 | 9.69E-05 | 1.08E-03 | 14 | 163   |
| A3 | Pubmed | 16713569 | A protein-protein interaction network for human inherited ataxias and disorders of Purkinje cell degeneration.                                                                         | 1.62E-07 | 6.01E-03 | 9.69E-05 | 1.08E-03 | 28 | 608   |
| A3 | Pubmed | 22268729 | Proteomic identification of common SCF ubiquitin ligase                                                                                                                                | 1.92E-07 | 7.09E-03 | 1.13E-04 | 1.25E-03 | 28 | 613   |

|    |              |                  |                                                                                                                                                                                         |          |          |          |          |    |     |
|----|--------------|------------------|-----------------------------------------------------------------------------------------------------------------------------------------------------------------------------------------|----------|----------|----------|----------|----|-----|
|    |              |                  | FBXO6-interacting glycoproteins in three kinds of cells.                                                                                                                                |          |          |          |          |    |     |
| A3 | Pubmed       | 24550385         | Characterizing WW domain interactions of tumor suppressor WWOX reveals its association with multiprotein networks.                                                                      | 2.15E-07 | 7.94E-03 | 1.24E-04 | 1.38E-03 | 16 | 220 |
| A3 | Pubmed       | 12621583         | Refinement of a 400-kb critical region allows genotypic differentiation between isolated lissencephaly, Miller-Dieker syndrome, and other phenotypes secondary to deletions of 17p13.3. | 2.31E-07 | 8.53E-03 | 1.27E-04 | 1.41E-03 | 6  | 19  |
| A3 | Pubmed       | 17724803         | Expression of angiopoietin-1, 2 and 4 and Tie-1 and 2 in gastrointestinal stromal tumor, leiomyoma and schwannoma.                                                                      | 2.31E-07 | 8.53E-03 | 1.27E-04 | 1.41E-03 | 4  | 5   |
| A3 | Pubmed       | 9151733          | Cloning and functional characterization of Roaz, a zinc finger protein that interacts with O/E-1 to regulate gene expression: implications for olfactory neuronal development.          | 2.31E-07 | 8.53E-03 | 1.27E-04 | 1.41E-03 | 4  | 5   |
| A3 | Pubmed       | 22412018         | A promiscuous biotin ligase fusion protein identifies proximal and interacting proteins in mammalian cells.                                                                             | 2.59E-07 | 9.58E-03 | 1.41E-04 | 1.56E-03 | 12 | 121 |
| A3 | Pubmed       | 23667531         | The SOX2-interactome in brain cancer cells identifies the requirement of MSI2 and USP9X for the growth of brain tumor cells.                                                            | 2.69E-07 | 9.95E-03 | 1.44E-04 | 1.60E-03 | 18 | 282 |
| A3 | Pubmed       | 23455922         | Interlaboratory reproducibility of large-scale human protein-complex analysis by standardized AP-MS.                                                                                    | 3.06E-07 | 1.13E-02 | 1.62E-04 | 1.79E-03 | 23 | 447 |
| A3 | Pubmed       | 22990118         | Charting the landscape of tandem BRCT domain-mediated protein interactions.                                                                                                             | 3.64E-07 | 1.35E-02 | 1.90E-04 | 2.11E-03 | 29 | 671 |
| A3 | Pubmed       | 25281560         | Proximity biotinylation and affinity purification are complementary approaches for the interactome mapping of chromatin-associated protein complexes.                                   | 4.01E-07 | 1.48E-02 | 2.06E-04 | 2.28E-03 | 28 | 636 |
| A3 | Pubmed       | 22261194         | Proteomics analysis of cardiac extracellular matrix remodeling in a porcine model of ischemia/reperfusion injury.                                                                       | 4.16E-07 | 1.54E-02 | 2.11E-04 | 2.34E-03 | 9  | 64  |
| A3 | Pubmed       | 19692168         | Genetic susceptibility to distinct bladder cancer subphenotypes.                                                                                                                        | 4.41E-07 | 1.63E-02 | 2.21E-04 | 2.45E-03 | 22 | 422 |
| A3 | Pubmed       | 16303743         | Signal sequence and keyword trap in silico for selection of full-length human cDNAs encoding secretion or membrane proteins from oligo-capped cDNA libraries.                           | 6.04E-07 | 2.24E-02 | 2.98E-04 | 3.31E-03 | 22 | 430 |
| A3 | Pubmed       | 22952844         | Targeted ubiquitination and degradation of G-protein-coupled receptor kinase 5 by the DDB1-CUL4 ubiquitin ligase complex.                                                               | 6.28E-07 | 2.32E-02 | 3.06E-04 | 3.39E-03 | 13 | 156 |
| A3 | Pubmed       | 22586326         | Functional proteomics establishes the interaction of SIRT7 with chromatin remodeling complexes and expands its role in regulation of RNA polymerase I transcription.                    | 6.74E-07 | 2.49E-02 | 3.24E-04 | 3.60E-03 | 28 | 653 |
| A3 | Pubmed       | 19625176         | PTEN identified as important risk factor of chronic obstructive pulmonary disease.                                                                                                      | 1.07E-06 | 3.96E-02 | 5.08E-04 | 5.64E-03 | 20 | 376 |
| A3 | Pubmed       | 20800603         | Investigation of genetic susceptibility factors for human longevity - a targeted nonsynonymous SNP study.                                                                               | 1.33E-06 | 4.94E-02 | 6.22E-04 | 6.90E-03 | 18 | 315 |
| A3 | Pubmed       | 20346360         | Genetic risk factors for hepatopulmonary syndrome in patients with advanced liver disease.                                                                                              | 1.35E-06 | 4.98E-02 | 6.22E-04 | 6.90E-03 | 10 | 94  |
| A3 | Coexpression | 20421987-TableS1 | Human Lung_Hou10_1067genes                                                                                                                                                              | 5.43E-30 | 5.65E-26 | 5.65E-26 | 5.55E-25 | 94 | 724 |

|    |              |                          |                                                                                                                                               |          |          |          |          |     |       |
|----|--------------|--------------------------|-----------------------------------------------------------------------------------------------------------------------------------------------|----------|----------|----------|----------|-----|-------|
| A3 | Coexpression | 19036130-TableS1a        | Mouse Viral_Mendoza-Villanueva08_1830genes                                                                                                    | 7.15E-23 | 7.44E-19 | 3.72E-19 | 3.66E-18 | 131 | 1,561 |
| A3 | Coexpression | 18310505-TableS8         | Human StemCell_Matushansky08_297genes                                                                                                         | 6.38E-20 | 6.65E-16 | 1.67E-16 | 1.64E-15 | 46  | 269   |
| A3 | Coexpression | 15793299-TableC          | Mouse Breast_Astolfi05_1104genes_TumorGenes                                                                                                   | 6.40E-20 | 6.67E-16 | 1.67E-16 | 1.64E-15 | 87  | 872   |
| A3 | Coexpression | 19038878-SuppTable3      | Human Leukemia_Lenz08_385genes                                                                                                                | 7.17E-19 | 7.46E-15 | 1.35E-15 | 1.33E-14 | 51  | 349   |
| A3 | Coexpression | M2573                    | Genes consistently up-regulated in mammary stem cells both in mouse and human species.                                                        | 7.78E-19 | 8.10E-15 | 1.35E-15 | 1.33E-14 | 61  | 489   |
| A3 | Coexpression | M1451                    | Top 100 probe sets contributing to the negative side of the 2nd principal component; associated with adipocytic differentiation.              | 5.99E-18 | 6.23E-14 | 8.91E-15 | 8.75E-14 | 25  | 80    |
| A3 | Coexpression | 16440291-SuppTable1      | Human HeadandNeck_Martens06_209genes                                                                                                          | 7.95E-18 | 8.28E-14 | 1.04E-14 | 1.02E-13 | 38  | 206   |
| A3 | Coexpression | M7396                    | Genes down-regulated in the Kras2LA mouse lung cancer model with mutated KRAS [GeneID=3845].                                                  | 1.05E-16 | 1.09E-12 | 1.21E-13 | 1.19E-12 | 54  | 435   |
| A3 | Coexpression | M1834                    | Genes up-regulated in freshly isolated CD31- [GeneID=5175] (stromal stem cells from adipose tissue) versus the CD31+ (non-stem) counterparts. | 1.35E-16 | 1.40E-12 | 1.40E-13 | 1.38E-12 | 41  | 260   |
| A3 | Coexpression | 16488994-SuppTable1a     | Mouse Lung_Lu06_856genes_Array MG_U74Av2                                                                                                      | 4.16E-16 | 4.33E-12 | 3.94E-13 | 3.87E-12 | 54  | 449   |
| A3 | Coexpression | 18310505-TableS1         | Human StemCell_Matushansky08_886genes                                                                                                         | 7.37E-16 | 7.68E-12 | 6.40E-13 | 6.29E-12 | 69  | 695   |
| A3 | Coexpression | 16488994-SuppTable1b     | Mouse Lung_Lu06_856genes_Array MEO430Av2                                                                                                      | 9.83E-16 | 1.02E-11 | 7.87E-13 | 7.74E-12 | 53  | 443   |
| A3 | Coexpression | 16288205-GeneTable3      | Human Breast_Charafe-Jauffret06_1309genes                                                                                                     | 1.96E-15 | 2.04E-11 | 1.46E-12 | 1.43E-11 | 79  | 884   |
| A3 | Coexpression | M19391                   | Genes down-regulated in prostate cancer samples.                                                                                              | 7.19E-15 | 7.49E-11 | 4.99E-12 | 4.91E-11 | 54  | 480   |
| A3 | Coexpression | M17471                   | Genes up-regulated in invasive ductal carcinoma (IDC) relative to ductal carcinoma in situ (DCIS, non-invasive).                              | 5.45E-14 | 5.67E-10 | 3.55E-11 | 3.48E-10 | 44  | 351   |
| A3 | Coexpression | 18338247-SuppTable4B     | Human Breast_Harvell08_428genes                                                                                                               | 7.33E-14 | 7.64E-10 | 4.49E-11 | 4.41E-10 | 41  | 311   |
| A3 | Coexpression | 20421987-TableS2         | Human Lung_Hou10_187genes                                                                                                                     | 1.83E-13 | 1.90E-09 | 1.03E-10 | 1.00E-09 | 27  | 141   |
| A3 | Coexpression | 19843711-TableS1         | Human Kidney_Sallustio10_2134genes_DiscriminatedARPCsFromRPTEC/MSC                                                                            | 1.87E-13 | 1.95E-09 | 1.03E-10 | 1.00E-09 | 115 | 1,688 |
| A3 | Coexpression | 15220918-TableS1a        | Human Viral_Wang04_1482genes                                                                                                                  | 2.17E-13 | 2.26E-09 | 1.13E-10 | 1.11E-09 | 90  | 1,178 |
| A3 | Coexpression | 19843711-TableS2         | Human Kidney_Sallustio10_2134genes_CompleteListAnalysis                                                                                       | 2.49E-13 | 2.60E-09 | 1.24E-10 | 1.22E-09 | 114 | 1,674 |
| A3 | Coexpression | 16293578-SuppTable2      | Human StemCell_Cai06_1370genes                                                                                                                | 3.85E-13 | 4.00E-09 | 1.82E-10 | 1.79E-09 | 90  | 1,190 |
| A3 | Coexpression | 15785748-Table3          | Human Uterine_Santin05_178genes                                                                                                               | 6.60E-12 | 6.87E-08 | 3.00E-09 | 2.94E-08 | 26  | 151   |
| A3 | Coexpression | 18498629-GeneList        | Human Breast_Loi08_239genes                                                                                                                   | 9.87E-12 | 1.03E-07 | 4.28E-09 | 4.21E-08 | 28  | 178   |
| A3 | Coexpression | M9192                    | Genes down-regulated in luminal-like breast cancer cell lines compared to the mesenchymal-like ones.                                          | 1.32E-11 | 1.38E-07 | 5.51E-09 | 5.42E-08 | 47  | 460   |
| A3 | Coexpression | M2129                    | Genes up-regulated in confluent IMR90 cells (fibroblast) after knockdown of RB1 [GeneID=5925] by RNAi.                                        | 1.82E-11 | 1.89E-07 | 7.27E-09 | 7.15E-08 | 53  | 566   |
| A3 | Coexpression | 18006812-TableS1         | Human Lymphoma_Piccaluga07_260genes                                                                                                           | 5.38E-11 | 5.60E-07 | 2.08E-08 | 2.04E-07 | 29  | 204   |
| A3 | Coexpression | M12225                   | Up-regulated genes in angioimmunoblastic lymphoma (AILT) compared to normal T lymphocytes.                                                    | 6.07E-11 | 6.32E-07 | 2.26E-08 | 2.22E-07 | 29  | 205   |
| A3 | Coexpression | 18435859-ShorterGeneList | Mouse Breast_Piechocki08_558genes                                                                                                             | 1.35E-10 | 1.41E-06 | 4.85E-08 | 4.77E-07 | 40  | 376   |
| A3 | Coexpression | M3837                    | Down-regulated genes in pediatric adrenocortical tumors (ACT) compared to the normal tissue.                                                  | 1.42E-10 | 1.48E-06 | 4.93E-08 | 4.84E-07 | 50  | 545   |
| A3 | Coexpression | 17975224-TableS6         | Mouse Viral_Cho08_252genes                                                                                                                    | 1.96E-10 | 2.04E-06 | 6.58E-08 | 6.47E-07 | 27  | 188   |

|    |              |                      |                                                                                                                                                        |          |          |          |          |     |       |
|----|--------------|----------------------|--------------------------------------------------------------------------------------------------------------------------------------------------------|----------|----------|----------|----------|-----|-------|
| A3 | Coexpression | 18310505-Table1      | Human StemCell_Matushansky08_69genes                                                                                                                   | 2.28E-10 | 2.38E-06 | 7.43E-08 | 7.30E-07 | 15  | 55    |
| A3 | Coexpression | 17683608-TableS1     | Mouse StemCell_Ulloa-Montoya07_546genes                                                                                                                | 2.68E-10 | 2.80E-06 | 8.47E-08 | 8.33E-07 | 44  | 451   |
| A3 | Coexpression | M4995                | Genes specifically up-regulated in Cluster IIb of urothelial cell carcinoma (UCC) tumors.                                                              | 4.05E-10 | 4.22E-06 | 1.24E-07 | 1.22E-06 | 40  | 390   |
| A3 | Coexpression | M97                  | Genes up-regulated in glomeruli of kidneys from patients with diabetic nephropathy (type 2 diabetes mellitus).                                         | 4.27E-10 | 4.44E-06 | 1.27E-07 | 1.25E-06 | 18  | 86    |
| A3 | Coexpression | 19286929-SuppTable1  | Mouse Lung_Rangasamy09_2003genes                                                                                                                       | 4.92E-10 | 5.13E-06 | 1.42E-07 | 1.40E-06 | 102 | 1,621 |
| A3 | Coexpression | 17234769-TableS2b    | Human StemCell_West07_669genes                                                                                                                         | 5.16E-10 | 5.37E-06 | 1.45E-07 | 1.43E-06 | 48  | 530   |
| A3 | Coexpression | M12921               | Genes up-regulated in brain from patients with Alzheimer's disease.                                                                                    | 5.36E-10 | 5.58E-06 | 1.47E-07 | 1.44E-06 | 105 | 1,690 |
| A3 | Coexpression | M1533                | All significantly down-regulated genes in kidney glomeruli isolated from TCF21 [GeneID=6943] knockout mice.                                            | 5.64E-10 | 5.87E-06 | 1.51E-07 | 1.48E-06 | 64  | 830   |
| A3 | Coexpression | 18535662-TableS2c    | Mouse Lymphoma_Wu08_1148genes                                                                                                                          | 1.15E-09 | 1.20E-05 | 3.01E-07 | 2.95E-06 | 48  | 543   |
| A3 | Coexpression | 17660535-TableS4b    | Mouse InnerEar_Sajan08_2230genes                                                                                                                       | 1.47E-09 | 1.53E-05 | 3.74E-07 | 3.67E-06 | 115 | 1,948 |
| A3 | Coexpression | 18535662-TableS1a    | Mouse Lymphoma_Wu08_1813genes                                                                                                                          | 1.69E-09 | 1.76E-05 | 4.20E-07 | 4.13E-06 | 67  | 913   |
| A3 | Coexpression | M80                  | Genes up-regulated in TC71 and EWS502 cells (Ewing's sarcoma) by EWSR1-FLI1 [GeneID=2130;2314] as inferred from RNAi knockdown of this fusion protein. | 2.52E-09 | 2.62E-05 | 6.09E-07 | 5.99E-06 | 84  | 1276  |
| A3 | Coexpression | M2324                | Genes up-regulated in uterus upon knockout of BMP2 [GeneID=650].                                                                                       | 2.65E-09 | 2.76E-05 | 6.26E-07 | 6.15E-06 | 58  | 745   |
| A3 | Coexpression | 15361855-SuppTable1  | Human Ovarian_Donninger04_1191genes                                                                                                                    | 3.46E-09 | 3.61E-05 | 7.85E-07 | 7.71E-06 | 69  | 970   |
| A3 | Coexpression | 19139136-TableS3     | Human Prostate_John-Aryankalayil09_2212genes                                                                                                           | 3.47E-09 | 3.61E-05 | 7.85E-07 | 7.71E-06 | 96  | 1,547 |
| A3 | Coexpression | 17161497-SuppTable1  | Human Lung_Dracheva07_162genes                                                                                                                         | 3.74E-09 | 3.90E-05 | 8.30E-07 | 8.15E-06 | 22  | 146   |
| A3 | Coexpression | 17724462-TableS2     | Human StemCell_Nuytten08_2072genes                                                                                                                     | 4.00E-09 | 4.12E-05 | 8.57E-07 | 8.43E-06 | 105 | 1,753 |
| A3 | Coexpression | 17284527-TableS2     | Human Lymphoma_Leval07_832genes                                                                                                                        | 4.11E-09 | 4.28E-05 | 8.74E-07 | 8.59E-06 | 52  | 639   |
| A3 | Coexpression | 19408105-SuppTable4  | Mouse Breast_Stein09_1780genes                                                                                                                         | 5.19E-09 | 5.40E-05 | 1.08E-06 | 1.06E-05 | 45  | 514   |
| A3 | Coexpression | 19061838-TableS7     | Human Viral_Cairo08_982genes                                                                                                                           | 5.91E-09 | 6.15E-05 | 1.21E-06 | 1.19E-05 | 60  | 801   |
| A3 | Coexpression | 18381423-SuppTable1a | Human StemCell_Riggi08_262genes                                                                                                                        | 1.12E-08 | 1.16E-04 | 2.24E-06 | 2.20E-05 | 24  | 182   |
| A3 | Coexpression | M2456                | Genes requiring MLL [GeneID=4297] for H3K4me3 and expression in MEF cells (embryonic fibroblast).                                                      | 1.34E-08 | 1.40E-04 | 2.64E-06 | 2.59E-05 | 31  | 289   |
| A3 | Coexpression | 15972966-TableS2b    | Human Colon_Lacroix05_61genes                                                                                                                          | 1.46E-08 | 1.52E-04 | 2.82E-06 | 2.78E-05 | 12  | 44    |
| A3 | Coexpression | M1941                | Genes with high-CpG-density promoters (HCP) bearing histone H3 dimethylation at K4 (H3K4me2) and trimethylation at K27 (H3K27me3) in brain.            | 1.51E-08 | 1.57E-04 | 2.86E-06 | 2.81E-05 | 72  | 1,069 |
| A3 | Coexpression | M17923               | Genes up-regulated in cultured stromal stem cells from adipose tissue, compared to the freshly isolated cells.                                         | 1.55E-08 | 1.61E-04 | 2.88E-06 | 2.83E-05 | 39  | 425   |
| A3 | Coexpression | M5930                | Genes defining epithelial-mesenchymal transition, as in wound healing, fibrosis and metastasis.                                                        | 1.66E-08 | 1.73E-04 | 3.00E-06 | 2.95E-05 | 25  | 200   |
| A3 | Coexpression | M7517                | Genes up-regulated in the luminal A subtype of breast cancer.                                                                                          | 1.67E-08 | 1.74E-04 | 3.00E-06 | 2.95E-05 | 16  | 84    |
| A3 | Coexpression | M17788               | Down-regulated genes whose expression profile is specific to Cluster I of urothelial cell carcinoma (UCC) tumors.                                      | 2.15E-08 | 2.24E-04 | 3.79E-06 | 3.73E-05 | 36  | 378   |
| A3 | Coexpression | 19605494-TableS2     | Mouse Skin_Driskell09_1477genes                                                                                                                        | 2.29E-08 | 2.39E-04 | 3.98E-06 | 3.91E-05 | 62  | 872   |
| A3 | Coexpression | M13256               | Genes down-regulated in mesenchymal stem cells (MSC) engineered to express EWS-FLI1 [GeneID=2130;2321]                                                 | 2.61E-08 | 2.72E-04 | 4.46E-06 | 4.38E-05 | 24  | 190   |

|    |              |                     |                                                                                                                                                                                    |          |          |          |          |     |       |
|----|--------------|---------------------|------------------------------------------------------------------------------------------------------------------------------------------------------------------------------------|----------|----------|----------|----------|-----|-------|
|    |              |                     | fusion protein.                                                                                                                                                                    |          |          |          |          |     |       |
| A3 | Coexpression | M8901               | Down-regulated genes from the 324 genes identified by two analytical methods as changed in the mammary tumors induced by transgenic expression of ERBB2 [GeneID=2064].             | 2.83E-08 | 2.95E-04 | 4.75E-06 | 4.67E-05 | 21  | 149   |
| A3 | Coexpression | M13867              | Genes up-regulated in HMLE cells (immortalized nontransformed mammary epithelium) after E-cadherin (CDH1) [GeneID=999] knockdown by RNAi.                                          | 4.44E-08 | 4.62E-04 | 7.34E-06 | 7.21E-05 | 28  | 256   |
| A3 | Coexpression | 19861896-SuppTable1 | Human Brain_Castells09_424genes                                                                                                                                                    | 4.88E-08 | 5.09E-04 | 7.95E-06 | 7.81E-05 | 35  | 373   |
| A3 | Coexpression | M1504               | Adipocyte abundant genes up-regulated in 3T3-L1 cells (fibroblasts induced to differentiate to adipocytes) in response to troglitazone [PubChem=5591].                             | 6.47E-08 | 6.73E-04 | 1.04E-05 | 1.02E-04 | 9   | 25    |
| A3 | Coexpression | 20559987-TableS1    | Rat Heart_Lara-Pezzi09_1421genes                                                                                                                                                   | 7.22E-08 | 7.52E-04 | 1.14E-05 | 1.12E-04 | 55  | 757   |
| A3 | Coexpression | M1578               | Genes down-regulated in freshly isolated CD31- [GeneID=5175] (stromal stem cells from adipose tissue) versus the CD31+ (non-stem) counterparts.                                    | 7.74E-08 | 8.06E-04 | 1.20E-05 | 1.18E-04 | 25  | 216   |
| A3 | Coexpression | M1999               | The 'adult tissue stem' module: genes coordinately up-regulated in a compendium of adult tissue stem cells.                                                                        | 8.64E-08 | 9.00E-04 | 1.32E-05 | 1.30E-04 | 53  | 721   |
| A3 | Coexpression | M10952              | Genes up-regulated in the atria of healthy hearts, compared to ventricles.                                                                                                         | 9.21E-08 | 9.60E-04 | 1.39E-05 | 1.37E-04 | 27  | 249   |
| A3 | Coexpression | M8513               | Genes up-regulated in the normal-like subtype of breast cancer.                                                                                                                    | 1.12E-07 | 1.17E-03 | 1.67E-05 | 1.64E-04 | 40  | 476   |
| A3 | Coexpression | M12432              | Genes down-regulated in unstable atherosclerotic plaques compared to the stable ones.                                                                                              | 1.21E-07 | 1.27E-03 | 1.75E-05 | 1.72E-04 | 11  | 43    |
| A3 | Coexpression | 19505326-SuppTable3 | Human Ovarian_Li09_2322genes_cisplatinresistance                                                                                                                                   | 1.23E-07 | 1.28E-03 | 1.75E-05 | 1.72E-04 | 102 | 1,804 |
| A3 | Coexpression | M14098              | Genes down-regulated in primary fibroblast cell culture after infection with HCMV (AD169 strain) at 24 h time point that were not down-regulated at the previous time point, 20 h. | 1.23E-07 | 1.28E-03 | 1.75E-05 | 1.72E-04 | 20  | 148   |
| A3 | Coexpression | M6520               | Genes up-regulated in patients at the incipient stage of Alzheimer's disease.                                                                                                      | 1.46E-07 | 1.52E-03 | 2.05E-05 | 2.02E-04 | 35  | 390   |
| A3 | Coexpression | 17724462-TableS1    | Human StemCell_Nuytten08_1622genes                                                                                                                                                 | 1.67E-07 | 1.74E-03 | 2.32E-05 | 2.28E-04 | 84  | 1,402 |
| A3 | Coexpression | M1484               | Genes up-regulated in pancreatic cells from mice with double knockout of E2F1 [GeneID=1869] and E2F2 [GeneID=1870] compared to wild type.                                          | 1.71E-07 | 1.79E-03 | 2.35E-05 | 2.31E-04 | 20  | 151   |
| A3 | Coexpression | 15972966-TableS2a   | Human Colon_Lacroix05_114genes                                                                                                                                                     | 2.40E-07 | 2.50E-03 | 3.25E-05 | 3.19E-04 | 14  | 77    |
| A3 | Coexpression | 17676974-TableS1    | Mouse StemCell_Chambers07_1667genes                                                                                                                                                | 2.49E-07 | 2.59E-03 | 3.29E-05 | 3.23E-04 | 76  | 1,236 |
| A3 | Coexpression | 16288205-GeneTable2 | Human Breast_Charafe-Jauffret06_1233genes                                                                                                                                          | 2.49E-07 | 2.60E-03 | 3.29E-05 | 3.23E-04 | 56  | 807   |
| A3 | Coexpression | 19331821-SuppTable3 | Human StemCell_Pilgaard09_26genes                                                                                                                                                  | 3.25E-07 | 3.39E-03 | 4.24E-05 | 4.16E-04 | 8   | 22    |
| A3 | Coexpression | 16498405-TableS3    | Mouse Kidney_Takemoto06_388genes_cat1                                                                                                                                              | 4.23E-07 | 4.41E-03 | 5.44E-05 | 5.35E-04 | 29  | 302   |
| A3 | Coexpression | M4196               | Genes up-regulated in PC3 cells (prostate cancer) after knockdown of EZH2 [GeneID=2146] by RNAi.                                                                                   | 4.86E-07 | 5.06E-03 | 6.17E-05 | 6.07E-04 | 66  | 1,037 |
| A3 | Coexpression | 16166195-TableS1b   | Mouse Testicular_Denolet06_342genes                                                                                                                                                | 4.92E-07 | 5.12E-03 | 6.17E-05 | 6.07E-04 | 26  | 254   |
| A3 | Coexpression | M9908               | Genes down-regulated in preneoplastic mammary tissues and whose expression is maintained in tumors.                                                                                | 5.00E-07 | 5.21E-03 | 6.20E-05 | 6.09E-04 | 13  | 70    |
| A3 | Coexpression | 14766275-Fig.2      | Human Uterine_Ferguson04_101genes                                                                                                                                                  | 5.39E-07 | 5.61E-03 | 6.58E-05 | 6.47E-04 | 14  | 82    |



|    |              |                     |                                                                                                                                                                  |          |          |          |          |    |       |
|----|--------------|---------------------|------------------------------------------------------------------------------------------------------------------------------------------------------------------|----------|----------|----------|----------|----|-------|
| A3 | Coexpression | M14027              | Down-regulated genes in lung tissue of smokers with chronic obstructive pulmonary disease (COPD) vs smokers without disease (GOLD-2 vs GOLD-0).                  | 5.43E-07 | 5.66E-03 | 6.58E-05 | 6.47E-04 | 17 | 120   |
| A3 | Coexpression | M4913               | Genes down-regulated in adipose tissue mesenchymal stem cells (ASC) vs bone marrow mesenchymal stem cells (rBMSCs)                                               | 6.30E-07 | 6.56E-03 | 7.53E-05 | 7.40E-04 | 16 | 108   |
| A3 | Coexpression | M2571               | Genes down-regulated during prostate cancer progression in the JOCK1 model due to inducible activation of FGFR1 [GeneID=2260] gene in prostate.                  | 6.37E-07 | 6.63E-03 | 7.53E-05 | 7.40E-04 | 29 | 308   |
| A3 | Coexpression | M13206              | Genes down-regulated in TC71 and EWS502 cells (Ewing's sarcoma) by EWSR1-FLI1 [GeneID=2130;2314] as inferred from RNAi knockdown of this fusion protein.         | 6.65E-07 | 6.93E-03 | 7.78E-05 | 7.65E-04 | 30 | 326   |
| A3 | Coexpression | M12176              | Genes down-regulated in robust Cluster 2 (rC2) of hepatoblastoma samples compared to those in the robust Cluster 1 (rC1).                                        | 6.84E-07 | 7.13E-03 | 7.92E-05 | 7.78E-04 | 23 | 210   |
| A3 | Coexpression | 19489030-SuppTable7 | Human Prostate_Chambers09_259genes                                                                                                                               | 7.18E-07 | 7.48E-03 | 8.22E-05 | 8.08E-04 | 22 | 195   |
| A3 | Coexpression | M1555               | Adipocyte abundant genes down-regulated in 3T3-L1 cells (fibroblasts induced to differentiate to adipocytes) in response to TNF [GeneID=7124].                   | 7.31E-07 | 7.61E-03 | 8.27E-05 | 8.13E-04 | 14 | 84    |
| A3 | Coexpression | 17273163-Supp1a     | Human Skin_Micke07_42genes                                                                                                                                       | 7.42E-07 | 7.73E-03 | 8.31E-05 | 8.17E-04 | 10 | 41    |
| A3 | Coexpression | M14427              | Genes down-regulated in nasopharyngeal carcinoma (NPC) compared to the normal tissue.                                                                            | 8.59E-07 | 8.95E-03 | 9.52E-05 | 9.36E-04 | 80 | 1,367 |
| A3 | Coexpression | M2580               | Genes consistently down-regulated in mature mammary luminal cells both in mouse and human species.                                                               | 1.05E-06 | 1.09E-02 | 1.15E-04 | 1.13E-03 | 15 | 99    |
| A3 | Coexpression | M5905               | Genes up-regulated during adipocyte differentiation (adipogenesis).                                                                                              | 1.11E-06 | 1.15E-02 | 1.17E-04 | 1.15E-03 | 22 | 200   |
| A3 | Coexpression | M8469               | Genes up-regulated in activated CD4 [GeneID=920] T cells: wildtype versus MIR17 [GeneID=406952] knockout.                                                        | 1.11E-06 | 1.15E-02 | 1.17E-04 | 1.15E-03 | 22 | 200   |
| A3 | Coexpression | M8734               | Genes up-regulated in T cells: control versus IL2 [GeneID=3558] stimulation for 17h.                                                                             | 1.11E-06 | 1.15E-02 | 1.17E-04 | 1.15E-03 | 22 | 200   |
| A3 | Coexpression | M13273              | Genes down-regulated in papillary thyroid carcinoma (PTC) compared to normal tissue.                                                                             | 1.11E-06 | 1.16E-02 | 1.17E-04 | 1.15E-03 | 24 | 232   |
| A3 | Coexpression | 15489886-TableS1b   | Human Sarcoma_Mason04_549genes                                                                                                                                   | 1.19E-06 | 1.24E-02 | 1.24E-04 | 1.22E-03 | 37 | 464   |
| A3 | Coexpression | 17471573-Table2     | Human Viral_Santagoets07_103genes                                                                                                                                | 1.31E-06 | 1.36E-02 | 1.35E-04 | 1.33E-03 | 14 | 88    |
| A3 | Coexpression | 17206280-TableS1C   | Mouse Breast_Park07_173genes                                                                                                                                     | 1.71E-06 | 1.78E-02 | 1.74E-04 | 1.71E-03 | 17 | 130   |
| A3 | Coexpression | M2675               | Genes down-regulated in HUVEC cells (endothelium) by treatment with VEGFA [Gene ID=7422].                                                                        | 2.30E-06 | 2.40E-02 | 2.30E-04 | 2.26E-03 | 21 | 193   |
| A3 | Coexpression | M14142              | Genes down-regulated in the invasive ductal carcinoma (IDC) compared to the invasive lobular carcinoma (ILC), the two major pathological types of breast cancer. | 2.32E-06 | 2.42E-02 | 2.30E-04 | 2.26E-03 | 10 | 46    |
| A3 | Coexpression | 17699775-SuppTable1 | Human Lung_Johnson07_1334genes                                                                                                                                   | 2.32E-06 | 2.42E-02 | 2.30E-04 | 2.26E-03 | 57 | 888   |
| A3 | Coexpression | M18090              | Genes down-regulated in PC3 cells (prostate cancer) after knockdown of NIPPI1 [GeneID=5511] by RNAi.                                                             | 2.57E-06 | 2.68E-02 | 2.52E-04 | 2.47E-03 | 55 | 848   |
| A3 | Coexpression | M5688               | Genes up-regulated in Paneth cell (part of intestinal epithelium) of mice with hypomorphic (reduced function) form of ATG16L1 [GeneID=55054].                    | 2.59E-06 | 2.69E-02 | 2.52E-04 | 2.47E-03 | 14 | 93    |
| A3 | Coexpression | M13944              | Genes up-regulated in TMX2-28 cells (breast cancer) which do not express ESR1 [GeneID=2099] compared to the                                                      | 2.72E-06 | 2.84E-02 | 2.63E-04 | 2.58E-03 | 18 | 149   |

|    |                    |                                               |                                                                                                               |          |          |          |          |     |       |  |
|----|--------------------|-----------------------------------------------|---------------------------------------------------------------------------------------------------------------|----------|----------|----------|----------|-----|-------|--|
|    |                    |                                               | parental MCF7 cells which do.                                                                                 |          |          |          |          |     |       |  |
| A3 | Coexpression       | M14385                                        | Genes down-regulated in fibroblasts with defective XPC [GeneID=7508] in response to cisplatin [PubChem=2767]. | 2.85E-06 | 2.97E-02 | 2.70E-04 | 2.65E-03 | 23  | 228   |  |
| A3 | Coexpression       | 20937356-TableS1                              | Rat Hypothalamic_Mansuy10_1270genes                                                                           | 2.85E-06 | 2.97E-02 | 2.70E-04 | 2.65E-03 | 57  | 894   |  |
| A3 | Coexpression       | 15845616-SuppTable3                           | Mouse Uterine_Jeong05_634genes                                                                                | 2.92E-06 | 3.04E-02 | 2.74E-04 | 2.69E-03 | 37  | 482   |  |
| A3 | Coexpression       | M2270                                         | Genes up-regulated during adipogenesis of 3T3-L1 cells (fibroblast).                                          | 3.58E-06 | 3.73E-02 | 3.33E-04 | 3.27E-03 | 7   | 21    |  |
| A3 | Coexpression       | 20220088-SuppTable1                           | Human Immune_Allen10_2900genes                                                                                | 3.68E-06 | 3.83E-02 | 3.39E-04 | 3.33E-03 | 96  | 1,798 |  |
| A3 | Coexpression       | M7762                                         | Genes down-regulated in macrophages: wildtype versus MYD88 [GeneID=4615] knockout.                            | 4.07E-06 | 4.23E-02 | 3.68E-04 | 3.62E-03 | 21  | 200   |  |
| A3 | Coexpression       | M4545                                         | Genes up-regulated in comparison of thymic progenitors versus DN2 thymocytes.                                 | 4.07E-06 | 4.23E-02 | 3.68E-04 | 3.62E-03 | 21  | 200   |  |
| A3 | Coexpression       | 18631401-TableS3                              | Human Breast_Yau08_1518genes_OxidativeStress                                                                  | 4.44E-06 | 4.62E-02 | 3.98E-04 | 3.92E-03 | 67  | 1,129 |  |
| A3 | Coexpression       | 19658189-TableS4                              | Human EmbryonicStemCell_Xu09_1801genes                                                                        | 4.78E-06 | 4.98E-02 | 4.25E-04 | 4.18E-03 | 80  | 1,430 |  |
| A3 | Coexpression Atlas | GSM777059_500                                 | Stromal Cells, LEC.MLN, gp38+ CD31+, Lymph Node, avg-4                                                        | 2.33E-24 | 1.05E-20 | 6.46E-21 | 5.81E-20 | 68  | 439   |  |
| A3 | Coexpression Atlas | GSM777067_500                                 | Stromal Cells, St.31-38-44-.SLN, CD45- gp38- CD31- CD44-, Lymph Node, avg-2                                   | 2.86E-24 | 1.29E-20 | 6.46E-21 | 5.81E-20 | 69  | 453   |  |
| A3 | Coexpression Atlas | GSM777063_500                                 | Stromal Cells, LEC.SLN, gp38+ CD31+, Lymph Node, avg-4                                                        | 9.97E-24 | 4.50E-20 | 1.21E-20 | 1.09E-19 | 68  | 450   |  |
| A3 | Coexpression Atlas | GSM777046_500                                 | Stromal Cells, Fi.Sk, gp38+ CD140a+, Skin, avg-4                                                              | 1.07E-23 | 4.83E-20 | 1.21E-20 | 1.09E-19 | 67  | 438   |  |
| A3 | Coexpression Atlas | PCBC_ratio_CardiacMyocyte_vs_SC_cfr-2X-p05    | Cardiac Myocyte Cells_vs_Pluripotent Stem Cells-Confounder_removed-fold2.0_adjp0.05                           | 7.83E-23 | 3.54E-19 | 7.07E-20 | 6.36E-19 | 149 | 1,769 |  |
| A3 | Coexpression Atlas | GSM777050_500                                 | Stromal Cells, FRC.MLN, gp38+ CD31- CD140a+, Lymph Node, avg-5                                                | 4.16E-22 | 1.88E-18 | 3.13E-19 | 2.82E-18 | 67  | 467   |  |
| A3 | Coexpression Atlas | GSM777032_500                                 | Stromal Cells, BEC.MLN, gp38- CD31+, Lymph Node, avg-5                                                        | 1.20E-20 | 5.43E-17 | 7.75E-18 | 6.97E-17 | 64  | 456   |  |
| A3 | Coexpression Atlas | GSM777055_500                                 | Stromal Cells, FRC.SLN, gp38+ CD31- CD140a+, Lymph Node, avg-4                                                | 4.96E-20 | 2.24E-16 | 2.80E-17 | 2.52E-16 | 63  | 455   |  |
| A3 | Coexpression Atlas | PCBC_ctl_CardiacMyocyte_1000                  | Progenitor-Cell-Biology-Consortium_reference_CardiacMyocyte_top-relative-expression-ranked_1000               | 2.41E-19 | 1.09E-15 | 1.21E-16 | 1.09E-15 | 97  | 985   |  |
| A3 | Coexpression Atlas | gudmap_kidney_adult_RenCorpusGlomer_1000      | kidney_adult_RenCorpusGlomer_top-relative-expression-ranked_1000                                              | 4.11E-19 | 1.85E-15 | 1.85E-16 | 1.67E-15 | 90  | 878   |  |
| A3 | Coexpression Atlas | gudmap_RNAseq_e15.5_Podocytes_2500            | gudmap_RNAseq_e15.5_Podocytes_2500                                                                            | 5.32E-19 | 2.40E-15 | 2.19E-16 | 1.97E-15 | 145 | 1,863 |  |
| A3 | Coexpression Atlas | GSM777043_500                                 | Stromal Cells, Fi.MTS15+.Th, CD45- PDGFRA+ MTS15+, Thymus, avg-3                                              | 1.49E-18 | 6.72E-15 | 5.60E-16 | 5.04E-15 | 60  | 445   |  |
| A3 | Coexpression Atlas | gudmap_RNAseq_p2_CD2APMEISWT_2500             | gudmap_RNAseq_p2_CD2APMEISWT_2500                                                                             | 3.03E-18 | 1.37E-14 | 1.05E-15 | 9.46E-15 | 141 | 1,822 |  |
| A3 | Coexpression Atlas | GSM777037_500                                 | Stromal Cells, BEC.SLN, gp38- CD31+, Lymph Node, avg-4                                                        | 6.76E-18 | 3.05E-14 | 2.18E-15 | 1.96E-14 | 60  | 459   |  |
| A3 | Coexpression Atlas | PCBC_ratio_BronchSmoothMuscl_vs_SC_cfr-2X-p05 | Bronchial Smooth Muscle Cells_vs_Pluripotent Stem Cells-Confounder_removed-fold2.0_adjp0.05                   | 9.00E-18 | 4.07E-14 | 2.71E-15 | 2.44E-14 | 145 | 1,923 |  |
| A3 | Coexpression Atlas | JC_hmvEC_2500_K1                              | JC_hmvEC_top-relative-expression-ranked_2500_k-means-cluster#1                                                | 9.90E-18 | 4.47E-14 | 2.80E-15 | 2.51E-14 | 91  | 939   |  |

|    |                    |                                                                                             |                                                                                              |          |          |          |          |     |       |
|----|--------------------|---------------------------------------------------------------------------------------------|----------------------------------------------------------------------------------------------|----------|----------|----------|----------|-----|-------|
| A3 | Coexpression Atlas | PCBC_ratio_Lung Fibroblast_vs_SC_cfr-2X-p05                                                 | Lung Fibroblast_vs_Puripotent Stem Cells-Confunder_removed-fold2.0_adjp0.05                  | 1.30E-17 | 5.86E-14 | 3.45E-15 | 3.10E-14 | 145 | 1,931 |
| A3 | Coexpression Atlas | gudmap_kidney_adult_Mesangium_Meis_1000                                                     | kidney_adult_Mesangium_Meis_top-relative-expression-ranked_1000                              | 9.33E-17 | 4.22E-13 | 2.34E-14 | 2.11E-13 | 85  | 872   |
| A3 | Coexpression Atlas | gudmap_kidney_adult_RenalCapsule_1000                                                       | kidney_adult_RenalCapsule_top-relative-expression-ranked_1000                                | 1.45E-16 | 6.57E-13 | 3.46E-14 | 3.11E-13 | 79  | 780   |
| A3 | Coexpression Atlas | gudmap_RNAseq_p2_Glomerular Endothelial_2500                                                | gudmap_RNAseq_p2_Glomerular Endothelial_2500                                                 | 2.76E-16 | 1.25E-12 | 6.24E-14 | 5.61E-13 | 129 | 1,686 |
| A3 | Coexpression Atlas | PCBC_ratio_PulmonMicrovasc_vs_SC_2X-p05                                                     | Pulmonary Microvascular_vs_Puripotent Stem Cells-fold2.0_adjp0.05                            | 4.07E-16 | 1.84E-12 | 8.49E-14 | 7.64E-13 | 136 | 1,831 |
| A3 | Coexpression Atlas | PCBC_ratio_PulmonMicrovasc_vs_SC_cfr-2X-p05                                                 | Pulmonary Microvascular_vs_Puripotent Stem Cells-Confunder_removed-fold2.0_adjp0.05          | 4.14E-16 | 1.87E-12 | 8.49E-14 | 7.64E-13 | 132 | 1,753 |
| A3 | Coexpression Atlas | Lungmap_Mouse_e16.5_Endothelial_Top_500_All                                                 | Lungmap_Mouse_e16.5_Endothelial_Top_500_All                                                  | 2.20E-15 | 9.92E-12 | 4.31E-13 | 3.88E-12 | 55  | 446   |
| A3 | Coexpression Atlas | gudmap_developingLowerUrinaryTract_P1_ureter_emap-30363_top-relative-expression-ranked_1000 | DevelopingLowerUrinaryTract_P1_ureter_emap-30363_top-relative-expression-ranked_1000         | 3.53E-15 | 1.60E-11 | 6.65E-13 | 5.98E-12 | 76  | 776   |
| A3 | Coexpression Atlas | PCBC_ratio_CardioEndothel_vs_SC_cfr-2X-p05                                                  | Cardiovascular Endothelial Cells_vs_Puripotent Stem Cells-Confunder_removed-fold2.0_adjp0.05 | 1.22E-14 | 5.52E-11 | 2.21E-12 | 1.99E-11 | 130 | 1,791 |
| A3 | Coexpression Atlas | gudmap_kidney_adult_GlomCapSys_Tie2_1000                                                    | kidney_adult_GlomCapSys_Tie2_top-relative-expression-ranked_1000                             | 1.94E-14 | 8.75E-11 | 3.27E-12 | 2.94E-11 | 79  | 852   |
| A3 | Coexpression Atlas | gudmap_dev gonad_e11.5_F_ReproVasc_Flk_200                                                  | dev gonad_e11.5_F_ReproVasc_Flk_top-relative-expression-ranked_200                           | 1.96E-14 | 8.84E-11 | 3.27E-12 | 2.94E-11 | 33  | 182   |
| A3 | Coexpression Atlas | GSM777067_100                                                                               | Stromal Cells, St.31-38-44-.SLN, CD45- gp38- CD31- CD44-, Lymph Node, avg-2                  | 2.38E-14 | 1.07E-10 | 3.84E-12 | 3.45E-11 | 23  | 85    |
| A3 | Coexpression Atlas | gudmap_RNAseq_p2_CD2APMEIS WT_2500_K4                                                       | gudmap_RNAseq_p2_CD2APMEISWT_2500_K4                                                         | 3.22E-14 | 1.45E-10 | 4.98E-12 | 4.48E-11 | 78  | 843   |
| A3 | Coexpression Atlas | gudmap_kidney_adult_RenMedVasc_Tie2_500                                                     | kidney_adult_RenMedVasc_Tie2_top-relative-expression-ranked_500                              | 3.31E-14 | 1.49E-10 | 4.98E-12 | 4.48E-11 | 51  | 417   |
| A3 | Coexpression Atlas | gudmap_dev gonad_e12.5_M_gudmap_devVasTestis_Flk_k2_500                                     | dev gonad_e12.5_M_DevVasTestis_Flk_k-means-cluster#2_top-relative-expression-ranked_500      | 5.20E-14 | 2.35E-10 | 7.57E-12 | 6.81E-11 | 42  | 298   |
| A3 | Coexpression Atlas | gudmap_dev gonad_e11.5_F_ReproVasc_Flk_500                                                  | dev gonad_e11.5_F_ReproVasc_Flk_top-relative-expression-ranked_500                           | 6.05E-14 | 2.73E-10 | 8.48E-12 | 7.63E-11 | 50  | 409   |
| A3 | Coexpression Atlas | BM Top 100 - adipose tissue subcutaneous                                                    | BM Top 100 - adipose tissue subcutaneous                                                     | 6.20E-14 | 2.80E-10 | 8.48E-12 | 7.63E-11 | 21  | 72    |
| A3 | Coexpression Atlas | gudmap_kidney_P0_JuxtaGlom_Ren1_1000                                                        | kidney_P0_JuxtaGlom_Ren1_top-relative-expression-ranked_1000                                 | 6.45E-14 | 2.91E-10 | 8.57E-12 | 7.71E-11 | 81  | 906   |
| A3 | Coexpression Atlas | facebase_RNAseq_e14.5_palate_poster_oral_Tgfr2_WT_2500                                      | facebase_RNAseq_e14.5_palate_poster_oral_Tgfr2_WT_2500                                       | 8.75E-14 | 3.95E-10 | 1.13E-11 | 1.02E-10 | 114 | 1,522 |
| A3 | Coexpression Atlas | gudmap_dev gonad_e11.5_M_ReproVasc_Flk_100                                                  | dev gonad_e11.5_M_ReproVasc_Flk_top-relative-expression-ranked_100                           | 1.95E-13 | 8.80E-10 | 2.34E-11 | 2.10E-10 | 23  | 93    |
| A3 | Coexpression Atlas | endothelial_Top_500_All                                                                     | endothelial_Top_500_All                                                                      | 1.96E-13 | 8.87E-10 | 2.34E-11 | 2.10E-10 | 55  | 496   |
| A3 | Coexpression Atlas | gudmap_developingLowerUrinaryTract_adult_bladder_1000                                       | DevelopingLowerUrinaryTract_adult_bladder_emap-29457_top-relative-expression-ranked_1000     | 1.97E-13 | 8.87E-10 | 2.34E-11 | 2.10E-10 | 70  | 736   |
| A3 | Coexpression Atlas | gudmap_dev gonad_e12.5_F_gudmap_devVasOvary_Flk_200                                         | dev gonad_e12.5_F_DevVasOvary_Flk_top-relative-expression-ranked_200                         | 2.74E-13 | 1.24E-09 | 3.18E-11 | 2.86E-10 | 31  | 176   |
| A3 | Coexpression Atlas | gudmap_dev                                                                                  | dev gonad_e13.5_M_DevVasTestis_Flk_top-relative-                                             | 3.21E-13 | 1.45E-09 | 3.55E-11 | 3.19E-10 | 76  | 846   |

|    |                       |                                                                       |                                                                                                             |          |          |          |          |     |       |  |
|----|-----------------------|-----------------------------------------------------------------------|-------------------------------------------------------------------------------------------------------------|----------|----------|----------|----------|-----|-------|--|
|    | Atlas                 | gonad_e13.5_M_gudmap_devVasTest<br>is_Flk_1000                        | expression-ranked_1000                                                                                      |          |          |          |          |     |       |  |
| A3 | Coexpression<br>Atlas | gudmap_kidney_adult_GlomCapSys_<br>Tie2_500                           | kidney_adult_GlomCapSys_Tie2_top-relative-expression-<br>ranked_500                                         | 3.22E-13 | 1.45E-09 | 3.55E-11 | 3.19E-10 | 50  | 427   |  |
| A3 | Coexpression<br>Atlas | gudmap_dev<br>gonad_e12.5_M_gudmap_devVasTest<br>is_Flk_500           | dev gonad_e12.5_M_DevVasTestis_Flk_top-relative-<br>expression-ranked_500                                   | 3.73E-13 | 1.69E-09 | 4.01E-11 | 3.61E-10 | 49  | 414   |  |
| A3 | Coexpression<br>Atlas | gudmap_kidney_adult_RenMedVasc_<br>Tie2_1000                          | kidney_adult_RenMedVasc_Tie2_top-relative-expression-<br>ranked_1000                                        | 4.08E-13 | 1.84E-09 | 4.27E-11 | 3.84E-10 | 76  | 850   |  |
| A3 | Coexpression<br>Atlas | JC_hmvEC_1000_K4                                                      | JC_hmvEC_top-relative-expression-ranked_1000_k-means-<br>cluster#4                                          | 4.21E-13 | 1.90E-09 | 4.27E-11 | 3.84E-10 | 50  | 430   |  |
| A3 | Coexpression<br>Atlas | geo_heart_2500_K2                                                     | geo_heart_top-relative-expression-ranked_2500_k-means-<br>cluster#2                                         | 4.26E-13 | 1.92E-09 | 4.27E-11 | 3.84E-10 | 92  | 1,138 |  |
| A3 | Coexpression<br>Atlas | gudmap_dev<br>gonad_e13.5_F_gudmap_devVascOva<br>ry_Flk_200           | dev gonad_e13.5_F_DevVascOvary_Flk_top-relative-<br>expression-ranked_200                                   | 4.39E-13 | 2.00E-09 | 4.31E-11 | 3.88E-10 | 31  | 179   |  |
| A3 | Coexpression<br>Atlas | gudmap_dev<br>gonad_e11.5_M_ReproVasc_Flk_200                         | dev gonad_e11.5_M_ReproVasc_Flk_top-relative-<br>expression-ranked_200                                      | 6.96E-13 | 3.14E-09 | 6.68E-11 | 6.01E-10 | 31  | 182   |  |
| A3 | Coexpression<br>Atlas | PCBC_ctl_CardioEndothel_1000                                          | Progenitor-Cell-Biology-<br>Consortium_reference_CardioEndothel_top-relative-<br>expression-ranked_1000     | 8.09E-13 | 3.66E-09 | 7.61E-11 | 6.85E-10 | 83  | 986   |  |
| A3 | Coexpression<br>Atlas | gudmap_developingLowerUrinaryTra<br>ct_P2_bladder detrusor (LCM)_1000 | DevelopingLowerUrinaryTract_P2_bladder detrusor<br>(LCM)_emap-30376_top-relative-expression-<br>ranked_1000 | 9.73E-13 | 4.40E-09 | 8.94E-11 | 8.04E-10 | 70  | 761   |  |
| A3 | Coexpression<br>Atlas | endothelial_Top_500_Cluster_4                                         | endothelial_Top_500_Cluster_4                                                                               | 9.90E-13 | 4.47E-09 | 8.94E-11 | 8.04E-10 | 37  | 258   |  |
| A3 | Coexpression<br>Atlas | DevelopingKidney_e15.5_Endothelial<br>cells_emap-29977_1000           | DevelopingKidney_e15.5_Endothelial cells_emap-<br>29977_top-relative-expression-ranked_1000                 | 1.17E-12 | 5.30E-09 | 1.04E-10 | 9.34E-10 | 70  | 764   |  |
| A3 | Coexpression<br>Atlas | gudmap_dev<br>gonad_e11.5_F_ReproVasc_Flk_1000                        | dev gonad_e11.5_F_ReproVasc_Flk_top-relative-<br>expression-ranked_1000                                     | 1.27E-12 | 5.74E-09 | 1.10E-10 | 1.00E-09 | 73  | 817   |  |
| A3 | Coexpression<br>Atlas | gudmap_dev<br>gonad_e11.5_M_ReproVasc_Flk_500                         | dev gonad_e11.5_M_ReproVasc_Flk_top-relative-<br>expression-ranked_500                                      | 1.40E-12 | 6.31E-09 | 1.19E-10 | 1.07E-09 | 48  | 414   |  |
| A3 | Coexpression<br>Atlas | gudmap_developingLowerUrinaryTra<br>ct_P2_bladder detrusor (LCM)_500  | DevelopingLowerUrinaryTract_P2_bladder detrusor<br>(LCM)_emap-30376_top-relative-expression-ranked_500      | 1.88E-12 | 8.51E-09 | 1.58E-10 | 1.42E-09 | 46  | 388   |  |
| A3 | Coexpression<br>Atlas | lungmap/P1_Pericyte_Subclass_All<br>subclasses                        | lungmap/P1_Pericyte_Subclass_All subclasses                                                                 | 1.96E-12 | 8.84E-09 | 1.61E-10 | 1.45E-09 | 31  | 189   |  |
| A3 | Coexpression<br>Atlas | PCBC_ctl_PulmonMicrovasc_1000                                         | Progenitor-Cell-Biology-<br>Consortium_reference_PulmonMicrovasc_top-relative-<br>expression-ranked_1000    | 2.01E-12 | 9.10E-09 | 1.62E-10 | 1.46E-09 | 82  | 985   |  |
| A3 | Coexpression<br>Atlas | gudmap_dev<br>gonad_e13.5_M_InterstitTestis_Sma_<br>1000              | dev gonad_e13.5_M_InterstitTestis_Sma_top-relative-<br>expression-ranked_1000                               | 2.75E-12 | 1.24E-08 | 2.18E-10 | 2.00E-09 | 70  | 778   |  |
| A3 | Coexpression<br>Atlas | facebase_RNAseq_e14.5_palate_poste<br>r_proximal_ERK2_WT_2500         | facebase_RNAseq_e14.5_palate_poster_proximal_ERK2_W<br>T_2500                                               | 2.99E-12 | 1.35E-08 | 2.33E-10 | 2.09E-09 | 118 | 1,686 |  |
| A3 | Coexpression<br>Atlas | gudmap_dev<br>gonad_e11.5_F_ReproVasc_Flk_100                         | dev gonad_e11.5_F_ReproVasc_Flk_top-relative-<br>expression-ranked_100                                      | 3.43E-12 | 1.55E-08 | 2.58E-10 | 2.32E-09 | 22  | 96    |  |
| A3 | Coexpression<br>Atlas | GSM777063_100                                                         | Stromal Cells, LEC.SLN, gp38+ CD31+, Lymph Node, avg-<br>4                                                  | 3.43E-12 | 1.55E-08 | 2.58E-10 | 2.32E-09 | 22  | 96    |  |
| A3 | Coexpression          | gudmap_RNAseq_e15.5_Podocytes_2                                       | gudmap_RNAseq_e15.5_Podocytes_2500_K0                                                                       | 3.58E-12 | 1.62E-08 | 2.65E-10 | 2.38E-09 | 90  | 1144  |  |

|    | Atlas              | 500_K0                                                  |                                                                                                        |          |          |          |          |     |       |
|----|--------------------|---------------------------------------------------------|--------------------------------------------------------------------------------------------------------|----------|----------|----------|----------|-----|-------|
| A3 | Coexpression Atlas | PCBC_ctl_geo-heart_1000                                 | geo_heart_top-relative-expression-ranked_1000                                                          | 3.77E-12 | 1.71E-08 | 2.75E-10 | 2.47E-09 | 82  | 997   |
| A3 | Coexpression Atlas | BM Top 100 - adipose tissue                             | BM Top 100 - adipose tissue                                                                            | 4.06E-12 | 1.83E-08 | 2.87E-10 | 2.58E-09 | 19  | 70    |
| A3 | Coexpression Atlas | lungmap/P1_Endothelial_Subclass_Endothelial-B(2)        | lungmap/P1_Endothelial_Subclass_Endothelial-B(2)                                                       | 4.07E-12 | 1.84E-08 | 2.87E-10 | 2.58E-09 | 35  | 244   |
| A3 | Coexpression Atlas | gudmap_kidney_e15.5_SmlBldVes_Tie2_k2_200               | kidney_e15.5_SmlBldVes_Tie2_k-means-cluster#2_top-relative-expression-ranked_200                       | 4.29E-12 | 1.94E-08 | 2.94E-10 | 2.64E-09 | 22  | 97    |
| A3 | Coexpression Atlas | GSM777046_100                                           | Stromal Cells, Fi.Sk, gp38+ CD140a+, Skin, avg-4                                                       | 4.29E-12 | 1.94E-08 | 2.94E-10 | 2.64E-09 | 22  | 97    |
| A3 | Coexpression Atlas | gudmap_kidney_adult_RenMedVasc_Tie2_200                 | kidney_adult_RenMedVasc_Tie2_top-relative-expression-ranked_200                                        | 5.01E-12 | 2.26E-08 | 3.38E-10 | 3.00E-09 | 29  | 172   |
| A3 | Coexpression Atlas | gudmap_RNAseq_e15.5_Mesangium_2500_K3                   | gudmap_RNAseq_e15.5_Mesangium_2500_K3                                                                  | 5.81E-12 | 2.62E-08 | 3.86E-10 | 3.47E-09 | 35  | 247   |
| A3 | Coexpression Atlas | PCBC_ratio_Bronchial Smooth Muscle_vs_SC_cfr-2X-p05     | Bronchial Smooth Muscle_vs_Pluripotent Stem Cells-Confounder_removed-fold2.0_adjp0.05                  | 6.00E-12 | 2.71E-08 | 3.93E-10 | 3.53E-09 | 123 | 1,806 |
| A3 | Coexpression Atlas | gudmap_developingLowerUrinaryTract_P1_bladder_1000_B    | DevelopingLowerUrinaryTract_P1_bladder_B_emap-30374_top-relative-expression-ranked_1000                | 6.85E-12 | 3.09E-08 | 4.42E-10 | 4.00E-09 | 69  | 776   |
| A3 | Coexpression Atlas | gudmap_dev gonad_e13.5_F_gudmap_devVasOvary_Flk_1000    | dev gonad_e13.5_F_DevVasOvary_Flk_top-relative-expression-ranked_1000                                  | 7.88E-12 | 3.56E-08 | 5.01E-10 | 4.51E-09 | 72  | 831   |
| A3 | Coexpression Atlas | gudmap_developingKidney_e13.5_podocyte cells_1000_k5    | DevelopingKidney_e13.5_podocyte cells_emap-27773_k-means-cluster#5_top-relative-expression-ranked_1000 | 8.55E-12 | 3.86E-08 | 5.36E-10 | 4.82E-09 | 28  | 164   |
| A3 | Coexpression Atlas | gudmap_kidney_adult_JuxtaGlom_Ren1_Captopr_1000         | kidney_adult_JuxtaGlom_Ren1_Captopr_top-relative-expression-ranked_1000                                | 8.66E-12 | 3.91E-08 | 5.36E-10 | 4.82E-09 | 69  | 780   |
| A3 | Coexpression Atlas | lungmap/P1_Pericyte_Subclass_Multiple                   | lungmap/P1_Pericyte_Subclass_Multiple                                                                  | 1.05E-11 | 4.76E-08 | 6.43E-10 | 5.78E-09 | 30  | 189   |
| A3 | Coexpression Atlas | gudmap_dev gonad_e12.5_F_gudmap_devVasOvary_Flk_100     | dev gonad_e12.5_F_DevVasOvary_Flk_top-relative-expression-ranked_100                                   | 1.16E-11 | 5.22E-08 | 6.87E-10 | 6.18E-09 | 21  | 92    |
| A3 | Coexpression Atlas | gudmap_dev gonad_e13.5_F_gudmap_devVasOvary_Flk_100     | dev gonad_e13.5_F_DevVasOvary_Flk_top-relative-expression-ranked_100                                   | 1.16E-11 | 5.22E-08 | 6.87E-10 | 6.18E-09 | 21  | 92    |
| A3 | Coexpression Atlas | BM Top 100 - adipose tissue omental                     | BM Top 100 - adipose tissue omental                                                                    | 1.19E-11 | 5.39E-08 | 7.01E-10 | 6.30E-09 | 19  | 74    |
| A3 | Coexpression Atlas | lungmap/P3_Endothelial_Subclass_Endothelial-B(1)        | lungmap/P3_Endothelial_Subclass_Endothelial-B(1)                                                       | 1.26E-11 | 5.68E-08 | 7.28E-10 | 6.55E-09 | 39  | 308   |
| A3 | Coexpression Atlas | gudmap_kidney_adult_RenalCapsule_500                    | kidney_adult_RenalCapsule_top-relative-expression-ranked_500                                           | 1.30E-11 | 5.89E-08 | 7.37E-10 | 6.63E-09 | 46  | 410   |
| A3 | Coexpression Atlas | lungmap/P1_Endothelial_Subclass_Endothelial-B(1)        | lungmap/P1_Endothelial_Subclass_Endothelial-B(1)                                                       | 1.31E-11 | 5.90E-08 | 7.37E-10 | 6.63E-09 | 35  | 254   |
| A3 | Coexpression Atlas | gudmap_dev gonad_e12.5_M_gudmap_devVasTestis_Flk_k2_200 | dev gonad_e12.5_M_DevVasTestis_Flk_k-means-cluster#2_top-relative-expression-ranked_200                | 1.45E-11 | 6.55E-08 | 8.09E-10 | 7.27E-09 | 27  | 156   |
| A3 | Coexpression Atlas | gudmap_dev gonad_e11.5_F_ReproVasc_Flk_k4_500           | dev gonad_e11.5_F_ReproVasc_Flk_k-means-cluster#4_top-relative-expression-ranked_500                   | 1.48E-11 | 6.67E-08 | 8.14E-10 | 7.32E-09 | 33  | 229   |

|    |                    |                                                            |                                                                                                       |          |          |          |          |     |       |
|----|--------------------|------------------------------------------------------------|-------------------------------------------------------------------------------------------------------|----------|----------|----------|----------|-----|-------|
| A3 | Coexpression Atlas | gudmap_dev gonad_e12.5_M_gudmap_devVasTestis_Flk_200       | dev gonad_e12.5_M_DevVasTestis_Flk_top-relative-expression-ranked_200                                 | 1.60E-11 | 7.22E-08 | 8.70E-10 | 7.83E-09 | 29  | 180   |
| A3 | Coexpression Atlas | gudmap_kidney_e15.5_SmlBldVes_Tie2_1000                    | kidney_e15.5_SmlBldVes_Tie2_top-relative-expression-ranked_1000                                       | 2.09E-11 | 9.43E-08 | 1.12E-09 | 1.01E-08 | 70  | 813   |
| A3 | Coexpression Atlas | gudmap_kidney_adult_GlomCapSys_Tie2_k3_1000                | kidney_adult_GlomCapSys_Tie2_k-means-cluster#3_top-relative-expression-ranked_1000                    | 2.10E-11 | 9.50E-08 | 1.12E-09 | 1.01E-08 | 34  | 245   |
| A3 | Coexpression Atlas | gudmap_dev gonad_e13.5_F_gudmap_devVasOvary_Flk_500        | dev gonad_e13.5_F_DevVasOvary_Flk_top-relative-expression-ranked_500                                  | 2.15E-11 | 9.71E-08 | 1.13E-09 | 1.02E-08 | 46  | 416   |
| A3 | Coexpression Atlas | gudmap_developingKidney_e15.5_Endothelial cells_1000       | DevelopingKidney_e15.5_Endothelial cells_emap-29965_top-relative-expression-ranked_1000               | 2.18E-11 | 9.86E-08 | 1.13E-09 | 1.02E-08 | 67  | 761   |
| A3 | Coexpression Atlas | endothelial_SubClass_DCN-hi_Top_500_All                    | endothelial_SubClass_DCN-hi_Top_500_All                                                               | 2.39E-11 | 1.08E-07 | 1.23E-09 | 1.10E-08 | 51  | 495   |
| A3 | Coexpression Atlas | gudmap_kidney_adult_GlomCapSys_Tie2_k4_500                 | kidney_adult_GlomCapSys_Tie2_k-means-cluster#4_top-relative-expression-ranked_500                     | 2.50E-11 | 1.13E-07 | 1.27E-09 | 1.14E-08 | 25  | 137   |
| A3 | Coexpression Atlas | PCBC_ctl_PulmonMicrovasc_500                               | Progenitor-Cell-Biology-Consortium_reference_PulmonMicrovasc_top-relative-expression-ranked_500       | 2.58E-11 | 1.16E-07 | 1.29E-09 | 1.16E-08 | 51  | 496   |
| A3 | Coexpression Atlas | gudmap_dev gonad_e11.5_F_ReproVasc_Flk_k3_200              | dev gonad_e11.5_F_ReproVasc_Flk_k-means-cluster#3_top-relative-expression-ranked_200                  | 2.68E-11 | 1.21E-07 | 1.33E-09 | 1.20E-08 | 23  | 116   |
| A3 | Coexpression Atlas | facebase_RNAseq_e14.5_palate_posterior_distal_ERK2_WT_2500 | facebase_RNAseq_e14.5_palate_posterior_distal_ERK2_WT_2500                                            | 2.81E-11 | 1.27E-07 | 1.38E-09 | 1.24E-08 | 107 | 1,522 |
| A3 | Coexpression Atlas | gudmap_RNAseq_e11.5_Ureteric_bud_2500                      | gudmap_RNAseq_e11.5_Ureteric_bud_2500                                                                 | 3.03E-11 | 1.37E-07 | 1.47E-09 | 1.33E-08 | 115 | 1,686 |
| A3 | Coexpression Atlas | gudmap_developingKidney_e13.5_podocyte cells_500_k2        | DevelopingKidney_e13.5_podocyte cells_emap-27773_k-means-cluster#2_top-relative-expression-ranked_500 | 3.40E-11 | 1.53E-07 | 1.63E-09 | 1.46E-08 | 21  | 97    |
| A3 | Coexpression Atlas | gudmap_dev gonad_e11.5_M_ReproVasc_Flk_k2_100              | dev gonad_e11.5_M_ReproVasc_Flk_k-means-cluster#2_top-relative-expression-ranked_100                  | 3.42E-11 | 1.55E-07 | 1.63E-09 | 1.46E-08 | 16  | 53    |
| A3 | Coexpression Atlas | gudmap_dev gonad_e12.5_F_gudmap_devVasOvary_Flk_k4_200     | dev gonad_e12.5_F_DevVasOvary_Flk_k-means-cluster#4_top-relative-expression-ranked_200                | 3.89E-11 | 1.76E-07 | 1.83E-09 | 1.65E-08 | 20  | 88    |
| A3 | Coexpression Atlas | gudmap_kidney_adult_CortVasc_Tie2_k3_500                   | kidney_adult_CortVasc_Tie2_k-means-cluster#3_top-relative-expression-ranked_500                       | 4.16E-11 | 1.88E-07 | 1.94E-09 | 1.74E-08 | 27  | 163   |
| A3 | Coexpression Atlas | gudmap_developingLowerUrinaryTract_adult_bladder_500       | DevelopingLowerUrinaryTract_adult_bladder_emap-29457_top-relative-expression-ranked_500               | 4.28E-11 | 1.93E-07 | 2.00E-09 | 1.77E-08 | 43  | 379   |
| A3 | Coexpression Atlas | gudmap_dev gonad_e11.5_M_ReproVasc_Flk_k3_500              | dev gonad_e11.5_M_ReproVasc_Flk_k-means-cluster#3_top-relative-expression-ranked_500                  | 4.82E-11 | 2.18E-07 | 2.20E-09 | 1.98E-08 | 32  | 226   |
| A3 | Coexpression Atlas | gudmap_kidney_e15.5_SmlBldVes_Tie2_k1_100                  | kidney_e15.5_SmlBldVes_Tie2_k-means-cluster#1_top-relative-expression-ranked_100                      | 5.77E-11 | 2.61E-07 | 2.61E-09 | 2.34E-08 | 15  | 47    |
| A3 | Coexpression Atlas | gudmap_kidney_e15.5_SmlBldVes_Tie2_500                     | kidney_e15.5_SmlBldVes_Tie2_top-relative-expression-ranked_500                                        | 5.85E-11 | 2.64E-07 | 2.62E-09 | 2.35E-08 | 45  | 413   |
| A3 | Coexpression Atlas | gudmap_dev gonad_e13.5_F_gudmap_devVasOvary_Flk_k2_200     | dev gonad_e13.5_F_DevVasOvary_Flk_k-means-cluster#2_top-relative-expression-ranked_200                | 6.06E-11 | 2.74E-07 | 2.68E-09 | 2.41E-08 | 22  | 110   |
| A3 | Coexpression Atlas | gudmap_kidney_e15.5_SmlBldVes_Tie2_k-means-cluster#4_top-  | kidney_e15.5_SmlBldVes_Tie2_k-means-cluster#4_top-                                                    | 6.20E-11 | 2.80E-07 | 2.72E-09 | 2.45E-08 | 29  | 190   |

|    | Atlas              | e2_k4_500                                                       | relative-expression-ranked_500                                                                     |          |          |          |          |     |       |
|----|--------------------|-----------------------------------------------------------------|----------------------------------------------------------------------------------------------------|----------|----------|----------|----------|-----|-------|
| A3 | Coexpression Atlas | gudmap_dev gonad_e12.5_F_gudmap_devVasOvary_Flk_500             | dev gonad_e12.5_F_DevVasOvary_Flk_top-relative-expression-ranked_500                               | 6.87E-11 | 3.10E-07 | 3.00E-09 | 2.67E-08 | 45  | 415   |
| A3 | Coexpression Atlas | gudmap_dev gonad_e12.5_F_gudmap_devVasOvary_Flk_1000            | dev gonad_e12.5_F_DevVasOvary_Flk_top-relative-expression-ranked_1000                              | 6.91E-11 | 3.12E-07 | 3.00E-09 | 2.67E-08 | 69  | 817   |
| A3 | Coexpression Atlas | gudmap_developingLowerUrinaryTract_P2_bladder stroma (LCM)_1000 | DevelopingLowerUrinaryTract_P2_bladder stroma (LCM)_emap-30396_top-relative-expression-ranked_1000 | 8.45E-11 | 3.82E-07 | 3.60E-09 | 3.24E-08 | 67  | 785   |
| A3 | Coexpression Atlas | gudmap_dev gonad_e13.5_M_gudmap_devVasTestis_Flk_k2_200         | dev gonad_e13.5_M_DevVasTestis_Flk_k-means-cluster#2_top-relative-expression-ranked_200            | 9.36E-11 | 4.23E-07 | 4.00E-09 | 3.55E-08 | 23  | 123   |
| A3 | Coexpression Atlas | gudmap_kidney_e15.5_SmlBldVes_Tie2_k4_1000                      | kidney_e15.5_SmlBldVes_Tie2_k-means-cluster#4_top-relative-expression-ranked_1000                  | 1.02E-10 | 4.61E-07 | 4.27E-09 | 3.84E-08 | 36  | 287   |
| A3 | Coexpression Atlas | JC_hmvEC_500_K1                                                 | JC_hmvEC_top-relative-expression-ranked_500_k-means-cluster#1                                      | 1.10E-10 | 4.95E-07 | 4.54E-09 | 4.08E-08 | 31  | 220   |
| A3 | Coexpression Atlas | lungmap/P3_Endothelial_Subclass_Endothelial-B(2)                | lungmap/P3_Endothelial_Subclass_Endothelial-B(2)                                                   | 1.22E-10 | 5.53E-07 | 5.00E-09 | 4.48E-08 | 37  | 303   |
| A3 | Coexpression Atlas | gudmap_developingLowerUrinaryTract_P1_bladder_1000_J            | DevelopingLowerUrinaryTract_P1_bladder_J_emap-30374_top-relative-expression-ranked_1000            | 1.23E-10 | 5.54E-07 | 5.00E-09 | 4.48E-08 | 66  | 774   |
| A3 | Coexpression Atlas | gudmap_kidney_adult_RenCorpuscGlomer_500                        | kidney_adult_RenCorpuscGlomer_top-relative-expression-ranked_500                                   | 1.23E-10 | 5.57E-07 | 5.00E-09 | 4.48E-08 | 46  | 438   |
| A3 | Coexpression Atlas | gudmap_developingLowerUrinaryTract_P1_ureter_500                | DevelopingLowerUrinaryTract_P1_ureter_emap-30363_top-relative-expression-ranked_500                | 1.27E-10 | 5.73E-07 | 5.07E-09 | 4.56E-08 | 43  | 392   |
| A3 | Coexpression Atlas | gudmap_dev gonad_e11.5_M_ReproVasc_Flk_1000                     | dev gonad_e11.5_M_ReproVasc_Flk_top-relative-expression-ranked_1000                                | 1.45E-10 | 6.57E-07 | 5.76E-09 | 5.18E-08 | 67  | 795   |
| A3 | Coexpression Atlas | GSM791122_500                                                   | Fetal Liver, SC.STSL.FL, IgM- CD24- CD117+ IL7R- CD150- CD48- AA4.1+ CD43+, Fetal Liver, avg-2     | 1.57E-10 | 7.09E-07 | 6.17E-09 | 5.55E-08 | 44  | 410   |
| A3 | Coexpression Atlas | DevelopingKidney_e15.5_Endothelial cells_emap-29977_500         | DevelopingKidney_e15.5_Endothelial cells_emap-29977_top-relative-expression-ranked_500             | 2.29E-10 | 1.03E-06 | 8.92E-09 | 8.02E-08 | 42  | 384   |
| A3 | Coexpression Atlas | facebase_RNAseq_e14.5_palate_posterior_nasal_Tgfr2_WT_2500      | facebase_RNAseq_e14.5_palate_posterior_nasal_Tgfr2_WT_2500                                         | 2.45E-10 | 1.11E-06 | 9.47E-09 | 8.52E-08 | 110 | 1,641 |
| A3 | Coexpression Atlas | gudmap_kidney_adult_RenalCapsule_k2_1000                        | kidney_adult_RenalCapsule_k-means-cluster#2_top-relative-expression-ranked_1000                    | 2.74E-10 | 1.24E-06 | 1.05E-08 | 9.45E-08 | 41  | 371   |
| A3 | Coexpression Atlas | Lungmap_Mouse_e16.5_Matrix fibroblast_Top_500_All               | Lungmap_Mouse_e16.5_Matrix fibroblast_Top_500_All                                                  | 3.41E-10 | 1.54E-06 | 1.29E-08 | 1.16E-07 | 44  | 420   |
| A3 | Coexpression Atlas | PCBC_ctl_CardioEndothel_100                                     | Progenitor-Cell-Biology-Consortium_reference_CardioEndothel_top-relative-expression-ranked_100     | 3.72E-10 | 1.68E-06 | 1.40E-08 | 1.26E-07 | 20  | 99    |
| A3 | Coexpression Atlas | gudmap_kidney_adult_CortVasc_Tie2_k2_1000                       | kidney_adult_CortVasc_Tie2_k-means-cluster#2_top-relative-expression-ranked_1000                   | 4.29E-10 | 1.94E-06 | 1.60E-08 | 1.44E-07 | 36  | 302   |
| A3 | Coexpression Atlas | gudmap_dev gonad_e12.5_M_gudmap_devVasTestis_Flk_100            | dev gonad_e12.5_M_DevVasTestis_Flk_top-relative-expression-ranked_100                              | 4.63E-10 | 2.09E-06 | 1.72E-08 | 1.54E-07 | 19  | 90    |
| A3 | Coexpression Atlas | GSM777059_100                                                   | Stromal Cells, LEC.MLN, gp38+ CD31+, Lymph Node, avg-4                                             | 5.66E-10 | 2.56E-06 | 2.06E-08 | 1.85E-07 | 19  | 91    |
| A3 | Coexpression Atlas | GSM791112_500                                                   | Stem Cells, SC.ST34F.BM, Lineage- cKit+ Sca-1+ flk2-                                               | 5.66E-10 | 2.56E-06 | 2.06E-08 | 1.85E-07 | 43  | 411   |

|    | Atlas              |                                                                  | CD34+, Bone marrow, avg-2                                                                                 |          |          |          |          |    |     |  |
|----|--------------------|------------------------------------------------------------------|-----------------------------------------------------------------------------------------------------------|----------|----------|----------|----------|----|-----|--|
| A3 | Coexpression Atlas | DevelopingKidney_e15.5_Endothelial cells_emap-29977_200          | DevelopingKidney_e15.5_Endothelial cells_emap-29977_top-relative-expression-ranked_200                    | 5.96E-10 | 2.69E-06 | 2.15E-08 | 1.94E-07 | 25 | 158 |  |
| A3 | Coexpression Atlas | lungmap/P1_MyoFB_Subclass_MyoFB-A                                | lungmap/P1_MyoFB_Subclass_MyoFB-A                                                                         | 6.05E-10 | 2.73E-06 | 2.17E-08 | 1.95E-07 | 32 | 249 |  |
| A3 | Coexpression Atlas | gudmap_dev gonad_e11.5_F_ReproVasc_Flk_k3_1000                   | dev gonad_e11.5_F_ReproVasc_Flk_k-means-cluster#3_top-relative-expression-ranked_1000                     | 6.24E-10 | 2.82E-06 | 2.22E-08 | 2.00E-07 | 45 | 444 |  |
| A3 | Coexpression Atlas | gudmap_kidney_adult_Mesangium_Meis_500                           | kidney_adult_Mesangium_Meis_top-relative-expression-ranked_500                                            | 6.68E-10 | 3.02E-06 | 2.36E-08 | 2.12E-07 | 44 | 429 |  |
| A3 | Coexpression Atlas | geo_heart_2500_K3                                                | geo_heart_top-relative-expression-ranked_2500_k-means-cluster#3                                           | 6.99E-10 | 3.16E-06 | 2.45E-08 | 2.20E-07 | 27 | 184 |  |
| A3 | Coexpression Atlas | facebase_RNAseq_e8.5_ParaxMesoderm_2500_K3                       | facebase_RNAseq_e8.5_ParaxMesoderm_2500_K3                                                                | 7.54E-10 | 3.41E-06 | 2.61E-08 | 2.35E-07 | 23 | 136 |  |
| A3 | Coexpression Atlas | BM Top 100 - coronary artery                                     | BM Top 100 - coronary artery                                                                              | 7.58E-10 | 3.42E-06 | 2.61E-08 | 2.35E-07 | 17 | 73  |  |
| A3 | Coexpression Atlas | gudmap_dev gonad_e13.5_M_InterstitFLeydig_MafB_1000              | dev gonad_e13.5_M_InterstitFLeydig_MafB_top-relative-expression-ranked_1000                               | 7.89E-10 | 3.56E-06 | 2.70E-08 | 2.43E-07 | 64 | 773 |  |
| A3 | Coexpression Atlas | lungmap/P1_MyoFB_Subclass_MyoFB-D                                | lungmap/P1_MyoFB_Subclass_MyoFB-D                                                                         | 8.04E-10 | 3.63E-06 | 2.73E-08 | 2.46E-07 | 31 | 238 |  |
| A3 | Coexpression Atlas | JC_fibro_1000_K1                                                 | JC_fibro_top-relative-expression-ranked_1000_k-means-cluster#1                                            | 8.24E-10 | 3.72E-06 | 2.78E-08 | 2.50E-07 | 46 | 464 |  |
| A3 | Coexpression Atlas | gudmap_dev gonad_e13.5_M_gudmap_devVasTestis_Flk_k4_500          | dev gonad_e13.5_M_DevVasTestis_Flk_k-means-cluster#4_top-relative-expression-ranked_500                   | 1.00E-09 | 4.40E-06 | 3.26E-08 | 2.93E-07 | 34 | 282 |  |
| A3 | Coexpression Atlas | gudmap_developingKidney_e13.5_podocyte cells_1000                | DevelopingKidney_e13.5_podocyte cells_emap-27773_top-relative-expression-ranked_1000                      | 1.23E-09 | 5.55E-06 | 4.07E-08 | 3.66E-07 | 68 | 855 |  |
| A3 | Coexpression Atlas | gudmap_dev gonad_e13.5_F_gudmap_devVasOvary_Flk_k3_1000          | dev gonad_e13.5_F_DevVasOvary_Flk_k-means-cluster#3_top-relative-expression-ranked_1000                   | 1.24E-09 | 5.58E-06 | 4.07E-08 | 3.66E-07 | 52 | 570 |  |
| A3 | Coexpression Atlas | gudmap_developingLowerUrinaryTract_e13.5_bladder mesenchyme_1000 | DevelopingLowerUrinaryTract_e13.5_bladder mesenchyme_emap-3087_top-relative-expression-ranked_1000        | 1.32E-09 | 5.96E-06 | 4.32E-08 | 3.89E-07 | 67 | 838 |  |
| A3 | Coexpression Atlas | gudmap_kidney_P0_JuxtaGlom_Ren1_500                              | kidney_P0_JuxtaGlom_Ren1_top-relative-expression-ranked_500                                               | 1.46E-09 | 6.59E-06 | 4.74E-08 | 4.27E-07 | 45 | 456 |  |
| A3 | Coexpression Atlas | gudmap_developingKidney_e15.5_Endothelial cells_500_k4           | DevelopingKidney_e15.5_Endothelial cells_emap-29965_k-means-cluster#4_top-relative-expression-ranked_500  | 1.55E-09 | 6.99E-06 | 4.99E-08 | 4.49E-07 | 29 | 217 |  |
| A3 | Coexpression Atlas | gudmap_dev gonad_e12.5_M_gudmap_devVasTestis_Flk_k4_1000         | dev gonad_e12.5_M_DevVasTestis_Flk_k-means-cluster#4_top-relative-expression-ranked_1000                  | 1.56E-09 | 7.03E-06 | 4.99E-08 | 4.49E-07 | 49 | 523 |  |
| A3 | Coexpression Atlas | gudmap_developingKidney_e15.5_Endothelial cells_1000_k2          | DevelopingKidney_e15.5_Endothelial cells_emap-29965_k-means-cluster#2_top-relative-expression-ranked_1000 | 1.75E-09 | 7.90E-06 | 5.56E-08 | 5.00E-07 | 35 | 303 |  |
| A3 | Coexpression Atlas | gudmap_developingLowerUrinaryTract_P1_bladder_B_1000_k1          | DevelopingLowerUrinaryTract_P1_bladder_B_emap-30374_k-means-cluster#1_top-relative-expression-ranked_1000 | 1.83E-09 | 8.26E-06 | 5.78E-08 | 5.20E-07 | 27 | 192 |  |
| A3 | Coexpression Atlas | gudmap_developingKidney_e15.5_Ureteral Smooth Musc_1000          | DevelopingKidney_e15.5_Ureteral Smooth Musc_emap-28812_top-relative-expression-ranked_1000                | 1.90E-09 | 8.60E-06 | 5.97E-08 | 5.37E-07 | 63 | 772 |  |
| A3 | Coexpression Atlas | gudmap_dev                                                       | dev gonad_e12.5_M_DevVasTestis_Flk_top-relative-                                                          | 2.00E-09 | 9.22E-06 | 6.36E-08 | 5.72E-07 | 67 | 847 |  |



|    |                    |                                                                      |                                                                                                                        |          |          |          |          |    |     |  |
|----|--------------------|----------------------------------------------------------------------|------------------------------------------------------------------------------------------------------------------------|----------|----------|----------|----------|----|-----|--|
|    | Atlas              | gonad_e12.5_M_gudmap_devVasTestis_Flk_1000                           | expression-ranked_1000                                                                                                 |          |          |          |          |    |     |  |
| A3 | Coexpression Atlas | gudmap_dev gonad_e13.5_M_gudmap_devVasTestis_Flk_500                 | dev gonad_e13.5_M_DevVasTestis_Flk_top-relative-expression-ranked_500                                                  | 2.28E-09 | 1.03E-05 | 7.01E-08 | 6.30E-07 | 43 | 430 |  |
| A3 | Coexpression Atlas | gudmap_kidney_e15.5_SmlBldVes_Tie2_100                               | kidney_e15.5_SmlBldVes_Tie2_top-relative-expression-ranked_100                                                         | 2.28E-09 | 1.03E-05 | 7.01E-08 | 6.30E-07 | 18 | 88  |  |
| A3 | Coexpression Atlas | lungmap/P1_Endothelial_Subclass_Vascular Endothelial-F               | lungmap/P1_Endothelial_Subclass_Vascular Endothelial-F                                                                 | 2.44E-09 | 1.10E-05 | 7.46E-08 | 6.71E-07 | 30 | 235 |  |
| A3 | Coexpression Atlas | PCBC_ctl_PulmonMicrovasc_100                                         | Progenitor-Cell-Biology-Consortium_reference_PulmonMicrovasc_top-relative-expression-ranked_100                        | 2.54E-09 | 1.15E-05 | 7.71E-08 | 6.93E-07 | 19 | 99  |  |
| A3 | Coexpression Atlas | PCBC_ctl_geo-heart_500                                               | geo_heart_top-relative-expression-ranked_500                                                                           | 2.86E-09 | 1.29E-05 | 8.60E-08 | 7.73E-07 | 47 | 499 |  |
| A3 | Coexpression Atlas | PCBC_ctl_BronchSmoothMuscl_1000                                      | Progenitor-Cell-Biology-Consortium_reference_BronchSmoothMuscl_top-relative-expression-ranked_1000                     | 2.93E-09 | 1.32E-05 | 8.77E-08 | 7.89E-07 | 74 | 987 |  |
| A3 | Coexpression Atlas | gudmap_kidney_adult_CortVasc_Tie2_500                                | kidney_adult_CortVasc_Tie2_top-relative-expression-ranked_500                                                          | 3.00E-09 | 1.37E-05 | 9.04E-08 | 8.13E-07 | 42 | 418 |  |
| A3 | Coexpression Atlas | gudmap_dev gonad_e13.5_F_gudmap_devVascOvary_Flk_k2_100              | dev gonad_e13.5_F_DevVascOvary_Flk_k-means-cluster#2_top-relative-expression-ranked_100                                | 3.11E-09 | 1.41E-05 | 9.19E-08 | 8.27E-07 | 14 | 52  |  |
| A3 | Coexpression Atlas | JC_fibro_1000                                                        | JC_fibro_top-relative-expression-ranked_1000                                                                           | 4.00E-09 | 1.79E-05 | 1.16E-07 | 1.05E-06 | 74 | 994 |  |
| A3 | Coexpression Atlas | gudmap_dev gonad_e13.5_M_gudmap_devVasTestis_Flk_k3_100              | dev gonad_e13.5_M_DevVasTestis_Flk_k-means-cluster#3_top-relative-expression-ranked_100                                | 4.09E-09 | 1.85E-05 | 1.19E-07 | 1.07E-06 | 14 | 53  |  |
| A3 | Coexpression Atlas | gudmap_kidney_adult_GlomCapSys_Tie2_200                              | kidney_adult_GlomCapSys_Tie2_top-relative-expression-ranked_200                                                        | 4.12E-09 | 1.86E-05 | 1.19E-07 | 1.07E-06 | 25 | 173 |  |
| A3 | Coexpression Atlas | gudmap_kidney_adult_CortVasc_Tie2_1000                               | kidney_adult_CortVasc_Tie2_top-relative-expression-ranked_1000                                                         | 4.94E-09 | 2.23E-05 | 1.42E-07 | 1.28E-06 | 66 | 847 |  |
| A3 | Coexpression Atlas | gudmap_developingKidney_e15.5_Ureteral Smooth Musc_500               | DevelopingKidney_e15.5_Ureteral Smooth Musc_emap-28812_top-relative-expression-ranked_500                              | 5.00E-09 | 2.27E-05 | 1.44E-07 | 1.29E-06 | 40 | 393 |  |
| A3 | Coexpression Atlas | gudmap_developingLowerUrinaryTract_P2_bladder detrusor (LCM)_1000_k1 | DevelopingLowerUrinaryTract_P2_bladder detrusor (LCM)_emap-30376_k-means-cluster#1_top-relative-expression-ranked_1000 | 5.41E-09 | 2.44E-05 | 1.54E-07 | 1.38E-06 | 30 | 243 |  |
| A3 | Coexpression Atlas | gudmap_kidney_e10.5_UretericTrunk_HoxB7_k3_1000                      | kidney_e10.5_UretericTrunk_HoxB7_k-means-cluster#3_top-relative-expression-ranked_1000                                 | 5.79E-09 | 2.61E-05 | 1.63E-07 | 1.47E-06 | 18 | 93  |  |
| A3 | Coexpression Atlas | gudmap_kidney_adult_Mesangium_Meis_k2_1000                           | kidney_adult_Mesangium_Meis_k-means-cluster#2_top-relative-expression-ranked_1000                                      | 5.91E-09 | 2.67E-05 | 1.66E-07 | 1.49E-06 | 37 | 348 |  |
| A3 | Coexpression Atlas | PCBC_ctl_CardiacMyocyte_500                                          | Progenitor-Cell-Biology-Consortium_reference_CardiacMyocyte_top-relative-expression-ranked_500                         | 6.43E-09 | 2.91E-05 | 1.79E-07 | 1.61E-06 | 46 | 495 |  |
| A3 | Coexpression Atlas | gudmap_RNAseq_e15.5_Podocytes_2500_K2                                | gudmap_RNAseq_e15.5_Podocytes_2500_K2                                                                                  | 6.62E-09 | 2.99E-05 | 1.84E-07 | 1.65E-06 | 36 | 334 |  |
| A3 | Coexpression Atlas | DevelopingKidney_e15.5_Endothelial cells_emap-29977_k5_1000          | DevelopingKidney_e15.5_Endothelial cells_emap-29977_k-means-cluster#5_top-relative-expression-ranked_1000              | 7.00E-09 | 3.17E-05 | 1.93E-07 | 1.74E-06 | 42 | 430 |  |
| A3 | Coexpression Atlas | gudmap_dev gonad_e11.5_M_ReproVasc_Flk_k4_                           | dev gonad_e11.5_M_ReproVasc_Flk_k-means-cluster#4_top-relative-expression-ranked_1000                                  | 7.32E-09 | 3.31E-05 | 2.01E-07 | 1.80E-06 | 47 | 514 |  |

|    |                    | 1000                                                           |                                                                                                              |          |          |          |          |     |       |
|----|--------------------|----------------------------------------------------------------|--------------------------------------------------------------------------------------------------------------|----------|----------|----------|----------|-----|-------|
| A3 | Coexpression Atlas | gudmap_RNAseq_e15.5_Endothelial_2500                           | gudmap_RNAseq_e15.5_Endothelial_2500                                                                         | 7.56E-09 | 3.42E-05 | 2.06E-07 | 1.85E-06 | 114 | 1,829 |
| A3 | Coexpression Atlas | gudmap_kidney_adult_JuxtaGlom_Ren1_1000                        | kidney_adult_JuxtaGlom_Ren1_top-relative-expression-ranked_1000                                              | 7.90E-09 | 3.57E-05 | 2.14E-07 | 1.92E-06 | 63  | 801   |
| A3 | Coexpression Atlas | gudmap_dev_gonad_e13.5_M_gudmap_devVasTestis_Flk_200           | dev_gonad_e13.5_M_DevVasTestis_Flk_top-relative-expression-ranked_200                                        | 8.38E-09 | 3.79E-05 | 2.24E-07 | 2.02E-06 | 25  | 179   |
| A3 | Coexpression Atlas | gudmap_kidney_e15.5_SmlBldVes_Tie2_200                         | kidney_e15.5_SmlBldVes_Tie2_top-relative-expression-ranked_200                                               | 8.38E-09 | 3.79E-05 | 2.24E-07 | 2.02E-06 | 25  | 179   |
| A3 | Coexpression Atlas | geo_heart_1000_K2                                              | geo_heart_top-relative-expression-ranked_1000_k-means-cluster#2                                              | 8.79E-09 | 3.97E-05 | 2.34E-07 | 2.10E-06 | 34  | 307   |
| A3 | Coexpression Atlas | DevelopingKidney_e15.5_Endothelial_cells_emap-29977_k5_500     | DevelopingKidney_e15.5_Endothelial_cells_emap-29977_k-means-cluster#5_top-relative-expression-ranked_500     | 9.14E-09 | 4.13E-05 | 2.41E-07 | 2.17E-06 | 26  | 193   |
| A3 | Coexpression Atlas | lungmap/P1_Endothelial_Subclass_Vascular_Endothelial-H         | lungmap/P1_Endothelial_Subclass_Vascular_Endothelial-H                                                       | 9.84E-09 | 4.44E-05 | 2.58E-07 | 2.32E-06 | 28  | 221   |
| A3 | Coexpression Atlas | endothelial-mural Subclass Vend2                               | endothelial-mural Subclass Vend2                                                                             | 1.02E-08 | 4.59E-05 | 2.65E-07 | 2.39E-06 | 43  | 452   |
| A3 | Coexpression Atlas | gudmap_developingLowerUrinaryTract_P2_bladder_stroma (LCM)_500 | DevelopingLowerUrinaryTract_P2_bladder_stroma (LCM)_emap-30396_top-relative-expression-ranked_500            | 1.11E-08 | 5.01E-05 | 2.88E-07 | 2.59E-06 | 39  | 388   |
| A3 | Coexpression Atlas | gudmap_kidney_adult_RenMedVasc_Tie2_k2_500                     | kidney_adult_RenMedVasc_Tie2_k-means-cluster#2_top-relative-expression-ranked_500                            | 1.19E-08 | 5.39E-05 | 3.08E-07 | 2.77E-06 | 24  | 169   |
| A3 | Coexpression Atlas | gudmap_dev_gonad_e13.5_M_gudmap_devVasTestis_Flk_k3_1000       | dev_gonad_e13.5_M_DevVasTestis_Flk_k-means-cluster#3_top-relative-expression-ranked_1000                     | 1.26E-08 | 5.70E-05 | 3.24E-07 | 2.91E-06 | 47  | 523   |
| A3 | Coexpression Atlas | GSM791126_500                                                  | Fetal Liver, SC.LTSL.FL, IgM- CD24- CD117+ IL7R- CD150+ CD48- AA4.1+ CD43+, Fetal Liver, avg-3               | 1.32E-08 | 5.98E-05 | 3.38E-07 | 3.04E-06 | 41  | 423   |
| A3 | Coexpression Atlas | gudmap_dev_gonad_e13.5_F_gudmap_devVasOvary_Flk_k3_500         | dev_gonad_e13.5_F_DevVasOvary_Flk_k-means-cluster#3_top-relative-expression-ranked_500                       | 1.34E-08 | 6.06E-05 | 3.41E-07 | 3.06E-06 | 24  | 170   |
| A3 | Coexpression Atlas | gudmap_developingKidney_e15.5_Ureteral_Smooth_Musc_1000_k2     | DevelopingKidney_e15.5_Ureteral_Smooth_Musc_emap-28812_k-means-cluster#2_top-relative-expression-ranked_1000 | 1.71E-08 | 7.74E-05 | 4.33E-07 | 3.89E-06 | 31  | 270   |
| A3 | Coexpression Atlas | gudmap_kidney_adult_RenalCapsule_k1_500                        | kidney_adult_RenalCapsule_k-means-cluster#1_top-relative-expression-ranked_500                               | 1.91E-08 | 8.61E-05 | 4.79E-07 | 4.30E-06 | 29  | 242   |
| A3 | Coexpression Atlas | BM Top 100 - saphenous vein                                    | BM Top 100 - saphenous vein                                                                                  | 2.06E-08 | 9.33E-05 | 5.15E-07 | 4.63E-06 | 15  | 69    |
| A3 | Coexpression Atlas | GSM777037_100                                                  | Stromal Cells, BEC.SLN, gp38- CD31+, Lymph Node, avg-4                                                       | 2.25E-08 | 1.01E-04 | 5.52E-07 | 4.97E-06 | 17  | 90    |
| A3 | Coexpression Atlas | GSM777032_100                                                  | Stromal Cells, BEC.MLN, gp38- CD31+, Lymph Node, avg-5                                                       | 2.25E-08 | 1.01E-04 | 5.52E-07 | 4.97E-06 | 17  | 90    |
| A3 | Coexpression Atlas | gudmap_developingKidney_e13.5_podocyte_cells_500               | DevelopingKidney_e13.5_podocyte_cells_emap-27773_top-relative-expression-ranked_500                          | 2.25E-08 | 1.02E-04 | 5.52E-07 | 4.97E-06 | 41  | 431   |
| A3 | Coexpression Atlas | gudmap_kidney_adult_GlomCapSys_Tie2_k1_200                     | kidney_adult_GlomCapSys_Tie2_k-means-cluster#1_top-relative-expression-ranked_200                            | 2.33E-08 | 1.05E-04 | 5.69E-07 | 5.12E-06 | 14  | 60    |
| A3 | Coexpression Atlas | gudmap_developingKidney_e15.5_Endothelial_cells_500            | DevelopingKidney_e15.5_Endothelial_cells_emap-29965_top-relative-expression-ranked_500                       | 2.60E-08 | 1.18E-04 | 6.32E-07 | 5.68E-06 | 38  | 384   |
| A3 | Coexpression Atlas | endothelial-mural Subclass Vsmc                                | endothelial-mural Subclass Vsmc                                                                              | 2.78E-08 | 1.26E-04 | 6.69E-07 | 6.01E-06 | 42  | 451   |

|    |                    |                                                                    |                                                                                                                      |          |          |          |          |     |       |
|----|--------------------|--------------------------------------------------------------------|----------------------------------------------------------------------------------------------------------------------|----------|----------|----------|----------|-----|-------|
| A3 | Coexpression Atlas | endothelial-mural                                                  | endothelial-mural                                                                                                    | 2.78E-08 | 1.26E-04 | 6.69E-07 | 6.01E-06 | 42  | 451   |
| A3 | Coexpression Atlas | endothelial_SubClass_DCN-hi_Top_500_Cluster_1                      | endothelial_SubClass_DCN-hi_Top_500_Cluster_1                                                                        | 2.87E-08 | 1.30E-04 | 6.85E-07 | 6.16E-06 | 28  | 232   |
| A3 | Coexpression Atlas | gudmap_developingLowerUrinaryTract_adult_bladder_1000_k4           | DevelopingLowerUrinaryTract_adult_bladder_emap-29457_k-means-cluster#4_top-relative-expression-ranked_1000           | 3.63E-08 | 1.64E-04 | 8.62E-07 | 7.75E-06 | 18  | 104   |
| A3 | Coexpression Atlas | gudmap_kidney_adult_RenCorpusGlomer_k2_500                         | kidney_adult_RenCorpusGlomer_k-means-cluster#2_top-relative-expression-ranked_500                                    | 3.85E-08 | 1.74E-04 | 9.10E-07 | 8.18E-06 | 19  | 116   |
| A3 | Coexpression Atlas | JC_hmvEC_1000                                                      | JC_hmvEC_top-relative-expression-ranked_1000                                                                         | 4.62E-08 | 2.09E-04 | 1.09E-06 | 9.78E-06 | 71  | 995   |
| A3 | Coexpression Atlas | facebase_RNAseq_e14.5_palate_poster_nasal_Tgfr2_WT_2500_K0         | facebase_RNAseq_e14.5_palate_poster_nasal_Tgfr2_WT_2500_K0                                                           | 5.14E-08 | 2.32E-04 | 1.20E-06 | 1.08E-05 | 24  | 182   |
| A3 | Coexpression Atlas | JC_hmvEC_500                                                       | JC_hmvEC_top-relative-expression-ranked_500                                                                          | 5.72E-08 | 2.58E-04 | 1.33E-06 | 1.20E-05 | 44  | 497   |
| A3 | Coexpression Atlas | gudmap_kidney_e10.5_UretericTrunk_HoxB7_k2_500                     | kidney_e10.5_UretericTrunk_HoxB7_k-means-cluster#2_top-relative-expression-ranked_500                                | 6.27E-08 | 2.83E-04 | 1.45E-06 | 1.31E-05 | 13  | 55    |
| A3 | Coexpression Atlas | JC_iEC_1000_K3                                                     | JC_iEC_top-relative-expression-ranked_1000_k-means-cluster#3                                                         | 6.91E-08 | 3.12E-04 | 1.59E-06 | 1.43E-05 | 22  | 158   |
| A3 | Coexpression Atlas | gudmap_RNAseq_p2_Glomerular_Endothelial_2500_K3                    | gudmap_RNAseq_p2_Glomerular_Endothelial_2500_K3                                                                      | 7.05E-08 | 3.18E-04 | 1.62E-06 | 1.45E-05 | 24  | 185   |
| A3 | Coexpression Atlas | gudmap_RNAseq_e11.5_Ureteric_bud_2500_K4                           | gudmap_RNAseq_e11.5_Ureteric_bud_2500_K4                                                                             | 7.19E-08 | 3.25E-04 | 1.64E-06 | 1.48E-05 | 53  | 662   |
| A3 | Coexpression Atlas | gudmap_RNAseq_e15.5_Collecting_Duct_2500_K3                        | gudmap_RNAseq_e15.5_Collecting_Duct_2500_K3                                                                          | 7.24E-08 | 3.27E-04 | 1.64E-06 | 1.48E-05 | 29  | 257   |
| A3 | Coexpression Atlas | gudmap_developingKidney_e15.5_Endothelial cells_200                | DevelopingKidney_e15.5_Endothelial cells_emap-29965_top-relative-expression-ranked_200                               | 7.75E-08 | 3.50E-04 | 1.75E-06 | 1.57E-05 | 22  | 159   |
| A3 | Coexpression Atlas | gudmap_kidney_adult_RenCorpusGlomer_k3_200                         | kidney_adult_RenCorpusGlomer_k-means-cluster#3_top-relative-expression-ranked_200                                    | 8.02E-08 | 3.62E-04 | 1.80E-06 | 1.62E-05 | 12  | 47    |
| A3 | Coexpression Atlas | gudmap_RNAseq_e15.5_Mesangium_2500                                 | gudmap_RNAseq_e15.5_Mesangium_2500                                                                                   | 8.09E-08 | 3.65E-04 | 1.81E-06 | 1.63E-05 | 112 | 1,867 |
| A3 | Coexpression Atlas | gudmap_developingLowerUrinaryTract_P2_bladder stroma (LCM)_1000_k3 | DevelopingLowerUrinaryTract_P2_bladder stroma (LCM)_emap-30396_k-means-cluster#3_top-relative-expression-ranked_1000 | 8.24E-08 | 3.72E-04 | 1.83E-06 | 1.64E-05 | 27  | 229   |
| A3 | Coexpression Atlas | gudmap_dev gonad_e13.5_M_InterstitFleydig_MafB_k3_1000             | dev gonad_e13.5_M_InterstitFleydig_MafB_k-means-cluster#3_top-relative-expression-ranked_1000                        | 8.24E-08 | 3.72E-04 | 1.83E-06 | 1.64E-05 | 34  | 336   |
| A3 | Coexpression Atlas | gudmap_developingKidney_e15.5_Ureteral Smooth Musc_500_k5          | DevelopingKidney_e15.5_Ureteral Smooth Musc_emap-28812_k-means-cluster#5_top-relative-expression-ranked_500          | 8.67E-08 | 3.92E-04 | 1.91E-06 | 1.71E-05 | 24  | 187   |
| A3 | Coexpression Atlas | PCBC_ratio_MESO-15_vs_MESO-5_cfr-2X-p05                            | Mesoderm Day 15_vs_Mesoderm Day 5-Confounder_removed-fold2.0_adjp0.05                                                | 8.69E-08 | 3.92E-04 | 1.91E-06 | 1.71E-05 | 74  | 1,071 |
| A3 | Coexpression Atlas | gudmap_dev gonad_e12.5_F_VasAssocMesStromOvary_Sma_500             | dev gonad_e12.5_F_VasAssocMesStromOvary_Sma_top-relative-expression-ranked_500                                       | 9.02E-08 | 4.08E-04 | 1.96E-06 | 1.77E-05 | 37  | 386   |
| A3 | Coexpression Atlas | gudmap_dev gonad_e13.5_F_VascAssocMesenchStromOvary_Sma_1000       | dev gonad_e13.5_F_VascAssocMesenchStromOvary_Sma_top-relative-expression-ranked_1000                                 | 9.04E-08 | 4.08E-04 | 1.96E-06 | 1.77E-05 | 60  | 798   |
| A3 | Coexpression Atlas | gudmap_developingLowerUrinaryTra                                   | DevelopingLowerUrinaryTract_P2_bladder urothelium                                                                    | 9.46E-08 | 4.27E-04 | 2.04E-06 | 1.84E-05 | 59  | 780   |

|    | Atlas              | ct_P2_bladder urothelium (LCM)_1000                             | (LCM)_emap-30380_top-relative-expression-ranked_1000                                                      |          |          |          |          |     |       |
|----|--------------------|-----------------------------------------------------------------|-----------------------------------------------------------------------------------------------------------|----------|----------|----------|----------|-----|-------|
| A3 | Coexpression Atlas | GSM605850_500                                                   | Myeloid Cells, MF.II-480hi.PC, F4/80hi CD115hi CD11b+ MHC II- CD11c-, Peritoneal Cavity, avg-3            | 1.01E-07 | 4.57E-04 | 2.18E-06 | 1.96E-05 | 40  | 438   |
| A3 | Coexpression Atlas | gudmap_kidney_e10.5_UretericTrunk_HoxB7_1000                    | kidney_e10.5_UretericTrunk_HoxB7_top-relative-expression-ranked_1000                                      | 1.08E-07 | 4.86E-04 | 2.30E-06 | 2.07E-05 | 60  | 802   |
| A3 | Coexpression Atlas | gudmap_kidney_adult_RenalCapsule_200                            | kidney_adult_RenalCapsule_top-relative-expression-ranked_200                                              | 1.15E-07 | 5.19E-04 | 2.45E-06 | 2.20E-05 | 23  | 176   |
| A3 | Coexpression Atlas | DevelopingLowerUrinaryTract_e14.5_bladder_emap-6668_1000        | DevelopingLowerUrinaryTract_e14.5_bladder_emap-6668_top-relative-expression-ranked_1000                   | 1.32E-07 | 5.97E-04 | 2.80E-06 | 2.52E-05 | 61  | 826   |
| A3 | Coexpression Atlas | gudmap_kidney_adult_RenMedVasc_Tie2_k2_1000                     | kidney_adult_RenMedVasc_Tie2_k-means-cluster#2_top-relative-expression-ranked_1000                        | 1.45E-07 | 6.56E-04 | 3.07E-06 | 2.76E-05 | 32  | 312   |
| A3 | Coexpression Atlas | PCBC_ctl_CardioEndothel_500                                     | Progenitor-Cell-Biology-Consortium_reference_CardioEndothel_top-relative-expression-ranked_500            | 1.54E-07 | 6.97E-04 | 3.23E-06 | 2.90E-05 | 43  | 497   |
| A3 | Coexpression Atlas | gudmap_developingLowerUrinaryTra ct_P1_bladder_J_1000_k2        | DevelopingLowerUrinaryTract_P1_bladder_J_emap-30374_k-means-cluster#2_top-relative-expression-ranked_1000 | 1.54E-07 | 6.98E-04 | 3.23E-06 | 2.90E-05 | 28  | 251   |
| A3 | Coexpression Atlas | Facebase_RNAseq_ratio_e9.5_MandibularArch_vs_MaxillaryArch_1000 | FacebaseRNAseq_ratio_e9.5_MandibularArch_vs_MaxillaryArch_top-relative-expression-ranked_1000             | 1.83E-07 | 8.25E-04 | 3.80E-06 | 3.42E-05 | 68  | 971   |
| A3 | Coexpression Atlas | GSM791102_500                                                   | Stem Cells, SC.LT34F.BM, Lineage- cKit+ Sca-1+ flk2- CD34-, Bone marrow, avg-3                            | 1.99E-07 | 9.00E-04 | 4.13E-06 | 3.71E-05 | 35  | 365   |
| A3 | Coexpression Atlas | facebase_RNAseq_e14.5_palate_poster_oral_Tgfr2_WT_2500_K3       | facebase_RNAseq_e14.5_palate_poster_oral_Tgfr2_WT_2500_K3                                                 | 2.48E-07 | 1.12E-03 | 5.10E-06 | 4.58E-05 | 19  | 130   |
| A3 | Coexpression Atlas | gudmap_developingLowerUrinaryTra ct_P1_bladder_500_B            | DevelopingLowerUrinaryTract_P1_bladder_B_emap-30374_top-relative-expression-ranked_500                    | 2.48E-07 | 1.12E-03 | 5.10E-06 | 4.58E-05 | 36  | 385   |
| A3 | Coexpression Atlas | gudmap_kidney_P0_JuxtaGlom_Ren1_k1_1000                         | kidney_P0_JuxtaGlom_Ren1_k-means-cluster#1_top-relative-expression-ranked_1000                            | 2.63E-07 | 1.19E-03 | 5.37E-06 | 4.83E-05 | 16  | 94    |
| A3 | Coexpression Atlas | gudmap_developingLowerUrinaryTra ct_P1_ureter_200               | DevelopingLowerUrinaryTract_P1_ureter_emap-30363_top-relative-expression-ranked_200                       | 2.73E-07 | 1.23E-03 | 5.56E-06 | 5.00E-05 | 21  | 157   |
| A3 | Coexpression Atlas | GSM476663_100                                                   | Stem Cells, SC.LTSL.BM, CD117+ IL7R- CD150+ CD48-AA4.1+ CD43+, Bone marrow, avg-1                         | 2.76E-07 | 1.25E-03 | 5.59E-06 | 5.03E-05 | 15  | 83    |
| A3 | Coexpression Atlas | lungmap/P1_MatrixFB_Subclass_MyoFB-F                            | lungmap/P1_MatrixFB_Subclass_MyoFB-F                                                                      | 2.97E-07 | 1.34E-03 | 5.99E-06 | 5.38E-05 | 28  | 259   |
| A3 | Coexpression Atlas | facebase_RNAseq_e14.5_palate_poster_distal_ERK2_WT_2500_K4      | facebase_RNAseq_e14.5_palate_poster_distal_ERK2_WT_2500_K4                                                | 3.23E-07 | 1.46E-03 | 6.48E-06 | 5.83E-05 | 25  | 215   |
| A3 | Coexpression Atlas | gudmap_dev gonad_e13.5_M_gudmap_devVasTestis_Flk_100            | dev gonad_e13.5_M_DevVasTestis_Flk_top-relative-expression-ranked_100                                     | 3.25E-07 | 1.47E-03 | 6.49E-06 | 5.84E-05 | 15  | 84    |
| A3 | Coexpression Atlas | gudmap_dev gonad_e13.5_F_VascAssocMesenchStromOvary_Sma_500     | dev gonad_e13.5_F_VascAssocMesenchStromOvary_Sma_top-relative-expression-ranked_500                       | 3.35E-07 | 1.51E-03 | 6.67E-06 | 6.00E-05 | 35  | 373   |
| A3 | Coexpression Atlas | gudmap_kidney_adult_JuxtaGlom_Ren1_Captopr_500                  | kidney_adult_JuxtaGlom_Ren1_Captopr_top-relative-expression-ranked_500                                    | 3.41E-07 | 1.54E-03 | 6.76E-06 | 6.08E-05 | 37  | 407   |
| A3 | Coexpression Atlas | gudmap_dev lower uro neuro_e15.5_PelvicGanglion_Sox10_k4_1000   | dev lower uro neuro_e15.5_PelvicGanglion_Sox10_k-means-cluster#4_top-relative-expression-ranked_1000      | 3.48E-07 | 1.57E-03 | 6.86E-06 | 6.17E-05 | 28  | 261   |
| A3 | Coexpression Atlas | PCBC_ratio_MESO-30_vs_SC_cfr-2X-p05                             | Mesoderm Day 30_vs_Pluripotent Stem Cells-Confounder_removed-fold2.0_adjp0.05                             | 3.56E-07 | 1.61E-03 | 7.00E-06 | 6.29E-05 | 100 | 1,659 |

|    |                    |                                                                   |                                                                                                                     |          |          |          |          |     |       |
|----|--------------------|-------------------------------------------------------------------|---------------------------------------------------------------------------------------------------------------------|----------|----------|----------|----------|-----|-------|
| A3 | Coexpression Atlas | gudmap_dev gonad_e11.5_F_GonadVasMes_Flk_1000                     | dev gonad_e11.5_F_GonadVasMes_Flk_top-relative-expression-ranked_1000                                               | 3.77E-07 | 1.70E-03 | 7.37E-06 | 6.63E-05 | 60  | 832   |
| A3 | Coexpression Atlas | PCBC_ratio_SC_vs_PulmonMicrovasc_c_cfr-2X-p05                     | Pluripotent Stem Cells_vs_Pulmonary Microvascular-Confounder_removed-fold2.0_adjp0.05                               | 4.36E-07 | 1.97E-03 | 8.48E-06 | 7.63E-05 | 101 | 1,688 |
| A3 | Coexpression Atlas | GSM399442_100                                                     | Stem Cells, SC.LTSL.BM, IgM- CD24- CD117+ IL7R- CD150+ CD48- AA4.1+ CD43+, Bone marrow, avg-2                       | 4.47E-07 | 2.02E-03 | 8.62E-06 | 7.75E-05 | 15  | 86    |
| A3 | Coexpression Atlas | gudmap_developingKidney_e15.5_Endothelial cells_200_k4            | DevelopingKidney_e15.5_Endothelial cells_emap-29965_k-means-cluster#4_top-relative-expression-ranked_200            | 4.47E-07 | 2.02E-03 | 8.62E-06 | 7.75E-05 | 15  | 86    |
| A3 | Coexpression Atlas | facebase_RNAseq_e14.5_palate_poster_oral_Tgfb2_WT_2500_K1         | facebase_RNAseq_e14.5_palate_poster_oral_Tgfb2_WT_2500_K1                                                           | 4.72E-07 | 2.13E-03 | 9.07E-06 | 8.15E-05 | 22  | 176   |
| A3 | Coexpression Atlas | endothelial_SubClass_MFSD2-hi_Top_500_Cluster_1                   | endothelial_SubClass_MFSD2-hi_Top_500_Cluster_1                                                                     | 4.75E-07 | 2.15E-03 | 9.09E-06 | 8.18E-05 | 28  | 265   |
| A3 | Coexpression Atlas | GSM791122_100                                                     | Fetal Liver, SC.STSL.FL, IgM- CD24- CD117+ IL7R- CD150- CD48- AA4.1+ CD43+, Fetal Liver, avg-2                      | 5.22E-07 | 2.36E-03 | 9.94E-06 | 8.94E-05 | 15  | 87    |
| A3 | Coexpression Atlas | JC_fibro_2500_K5                                                  | JC_fibro_top-relative-expression-ranked_2500_k-means-cluster#5                                                      | 6.48E-07 | 2.93E-03 | 1.23E-05 | 1.11E-04 | 59  | 826   |
| A3 | Coexpression Atlas | endothelial-mural Subclass Peric                                  | endothelial-mural Subclass Peric                                                                                    | 6.62E-07 | 2.99E-03 | 1.25E-05 | 1.13E-04 | 39  | 453   |
| A3 | Coexpression Atlas | gudmap_developingLowerUrinaryTract_P2_bladder stroma (LCM)_500_k2 | DevelopingLowerUrinaryTract_P2_bladder stroma (LCM)_emap-30396_k-means-cluster#2_top-relative-expression-ranked_500 | 6.96E-07 | 3.14E-03 | 1.31E-05 | 1.18E-04 | 17  | 113   |
| A3 | Coexpression Atlas | facebase_RNAseq_e14.5_palate_poster_proximal_ERK2_WT_2500_K3      | facebase_RNAseq_e14.5_palate_poster_proximal_ERK2_WT_2500_K3                                                        | 7.52E-07 | 3.40E-03 | 1.41E-05 | 1.27E-04 | 26  | 240   |
| A3 | Coexpression Atlas | ratio_EB_vs_SC_1000_K1                                            | ratio_EmbryoidBody_vs_StemCell_top-relative-expression-ranked_1000_k-means-cluster#1                                | 7.69E-07 | 3.47E-03 | 1.44E-05 | 1.29E-04 | 32  | 336   |
| A3 | Coexpression Atlas | gudmap_developingLowerUrinaryTract_e14.5_bladder_1000             | DevelopingLowerUrinaryTract_e14.5_bladder_emap-30872_top-relative-expression-ranked_1000                            | 7.77E-07 | 3.51E-03 | 1.44E-05 | 1.30E-04 | 58  | 811   |
| A3 | Coexpression Atlas | GSM399442_500                                                     | Stem Cells, SC.LTSL.BM, IgM- CD24- CD117+ IL7R- CD150+ CD48- AA4.1+ CD43+, Bone marrow, avg-2                       | 8.26E-07 | 3.73E-03 | 1.53E-05 | 1.38E-04 | 37  | 422   |
| A3 | Coexpression Atlas | Facebase_ST1_e8.5_ParaxMesoderm_500                               | e8.5_ParaxMesoderm_top-relative-expression-ranked_500                                                               | 8.74E-07 | 3.95E-03 | 1.61E-05 | 1.45E-04 | 37  | 423   |
| A3 | Coexpression Atlas | DevelopingKidney_e15.5_Endothelial cells_emap-29977_k3_200        | DevelopingKidney_e15.5_Endothelial cells_emap-29977_k-means-cluster#3_top-relative-expression-ranked_200            | 8.81E-07 | 3.98E-03 | 1.62E-05 | 1.46E-04 | 14  | 79    |
| A3 | Coexpression Atlas | gudmap_developingLowerUrinaryTract_adult_bladder_500_k3           | DevelopingLowerUrinaryTract_adult_bladder_emap-29457_k-means-cluster#3_top-relative-expression-ranked_500           | 9.48E-07 | 4.28E-03 | 1.73E-05 | 1.56E-04 | 16  | 103   |
| A3 | Coexpression Atlas | gudmap_developingLowerUrinaryTract_P1_ureter_1000_k2              | DevelopingLowerUrinaryTract_P1_ureter_emap-30363_k-means-cluster#2_top-relative-expression-ranked_1000              | 1.02E-06 | 4.59E-03 | 1.85E-05 | 1.66E-04 | 22  | 184   |
| A3 | Coexpression Atlas | GSM791102_100                                                     | Stem Cells, SC.LT34F.BM, Lineage- cKit+ Sca-1+ flk2- CD34-, Bone marrow, avg-3                                      | 1.03E-06 | 4.67E-03 | 1.87E-05 | 1.69E-04 | 14  | 80    |
| A3 | Coexpression Atlas | GSM476663_500                                                     | Stem Cells, SC.LTSL.BM, CD117+ IL7R- CD150+ CD48- AA4.1+ CD43+, Bone marrow, avg-1                                  | 1.06E-06 | 4.79E-03 | 1.92E-05 | 1.72E-04 | 36  | 409   |
| A3 | Coexpression Atlas | gudmap_kidney_adult_Podocyte_MafB_1000                            | kidney_adult_Podocyte_MafB_top-relative-expression-ranked_1000                                                      | 1.08E-06 | 4.86E-03 | 1.93E-05 | 1.73E-04 | 59  | 839   |
| A3 | Coexpression Atlas | gudmap_RNAseq_p2_Glomerular Endothelial_2500_K4                   | gudmap_RNAseq_p2_Glomerular Endothelial_2500_K4                                                                     | 1.08E-06 | 4.86E-03 | 1.93E-05 | 1.73E-04 | 35  | 392   |
| A3 | Coexpression Atlas | JC_iEC_500_K1                                                     | JC_iEC_top-relative-expression-ranked_500_k-means-cluster#1                                                         | 1.24E-06 | 5.58E-03 | 2.21E-05 | 1.98E-04 | 16  | 105   |

|    |                    |                                                                 |                                                                                                           |          |          |          |          |    |       |
|----|--------------------|-----------------------------------------------------------------|-----------------------------------------------------------------------------------------------------------|----------|----------|----------|----------|----|-------|
| A3 | Coexpression Atlas | gudmap_kidney_adult_GlomCapSys_Tie2_100                         | kidney_adult_GlomCapSys_Tie2_top-relative-expression-ranked_100                                           | 1.41E-06 | 6.36E-03 | 2.50E-05 | 2.25E-04 | 14 | 82    |
| A3 | Coexpression Atlas | gudmap_developingKidney_e15.5_S-shaped body_1000_k2             | DevelopingKidney_e15.5_S-shaped body_emap-27855_k-means-cluster#2_top-relative-expression-ranked_1000     | 1.46E-06 | 6.61E-03 | 2.59E-05 | 2.33E-04 | 22 | 188   |
| A3 | Coexpression Atlas | gudmap_kidney_adult_RenMedVasc_Tie2_k3_500                      | kidney_adult_RenMedVasc_Tie2_k-means-cluster#3_top-relative-expression-ranked_500                         | 1.65E-06 | 7.44E-03 | 2.91E-05 | 2.61E-04 | 17 | 120   |
| A3 | Coexpression Atlas | gudmap_kidney_adult_CortVasc_Tie2_k3_200                        | kidney_adult_CortVasc_Tie2_k-means-cluster#3_top-relative-expression-ranked_200                           | 1.74E-06 | 7.85E-03 | 3.06E-05 | 2.75E-04 | 11 | 51    |
| A3 | Coexpression Atlas | gudmap_kidney_adult_RenMedVasc_Tie2_k4_1000                     | kidney_adult_RenMedVasc_Tie2_k-means-cluster#4_top-relative-expression-ranked_1000                        | 1.76E-06 | 7.94E-03 | 3.08E-05 | 2.77E-04 | 24 | 220   |
| A3 | Coexpression Atlas | lungmap/P1_MyoFB_Subclass_MyoFB-G                               | lungmap/P1_MyoFB_Subclass_MyoFB-G                                                                         | 1.90E-06 | 8.57E-03 | 3.30E-05 | 2.97E-04 | 26 | 252   |
| A3 | Coexpression Atlas | DevelopingKidney_e15.5_Endothelial cells_emap-29977_100         | DevelopingKidney_e15.5_Endothelial cells_emap-29977_top-relative-expression-ranked_100                    | 1.90E-06 | 8.58E-03 | 3.30E-05 | 2.97E-04 | 14 | 84    |
| A3 | Coexpression Atlas | PCBC_ratio_MESO-15_vs_SC_cfr-2X-p05                             | Mesoderm Day 15_vs_Pluripotent Stem Cells-Confounder_removed-fold2.0_adjp0.05                             | 1.98E-06 | 8.95E-03 | 3.43E-05 | 3.09E-04 | 98 | 1,679 |
| A3 | Coexpression Atlas | gudmap_developingLowerUrinaryTract_e13.5_bladder mesenchyme_500 | DevelopingLowerUrinaryTract_e13.5_bladder mesenchyme_emap-3087_top-relative-expression-ranked_500         | 2.08E-06 | 9.39E-03 | 3.58E-05 | 3.22E-04 | 36 | 421   |
| A3 | Coexpression Atlas | facebase_RNAseq_e8.5_FloorPlate_2500                            | facebase_RNAseq_e8.5_FloorPlate_2500                                                                      | 2.09E-06 | 9.44E-03 | 3.59E-05 | 3.23E-04 | 97 | 1,659 |
| A3 | Coexpression Atlas | lungmap/P3_Endothelial_Subclass_Endothelial-A                   | lungmap/P3_Endothelial_Subclass_Endothelial-A                                                             | 2.13E-06 | 9.63E-03 | 3.64E-05 | 3.27E-04 | 29 | 302   |
| A3 | Coexpression Atlas | gudmap_dev gonad_e12.5_F_VasAssocMesStromOvary_Sma_k1_200       | dev gonad_e12.5_F_VasAssocMesStromOvary_Sma_k-means-cluster#1_top-relative-expression-ranked_200          | 2.13E-06 | 9.64E-03 | 3.64E-05 | 3.27E-04 | 11 | 52    |
| A3 | Coexpression Atlas | GSM791129_500                                                   | B cells, MLP.BM, CD19- IgM- CD43+ CD24intermediate AA4.1+ CD45R- CD, Bone marrow, avg-2                   | 2.14E-06 | 9.68E-03 | 3.64E-05 | 3.27E-04 | 35 | 404   |
| A3 | Coexpression Atlas | GSM791124_500                                                   | B cells, MLP.BM, CD19- IgM- CD43+ CD24- AA4.1+ CD45R- CD117+ IL7R-, Bone marrow, avg-2                    | 2.20E-06 | 9.92E-03 | 3.71E-05 | 3.34E-04 | 36 | 422   |
| A3 | Coexpression Atlas | 80Dn_Top_500_All                                                | 80Dn_Top_500_All                                                                                          | 2.23E-06 | 1.01E-02 | 3.76E-05 | 3.38E-04 | 40 | 494   |
| A3 | Coexpression Atlas | gudmap_developingKidney_e15.5_Endothelial cells_1000_k1         | DevelopingKidney_e15.5_Endothelial cells_emap-29965_k-means-cluster#1_top-relative-expression-ranked_1000 | 2.28E-06 | 1.03E-02 | 3.83E-05 | 3.44E-04 | 29 | 303   |
| A3 | Coexpression Atlas | GSM399454_500                                                   | Stem Cells, SC.STSL.BM, CD117+ IL7R- CD150- CD48- AA4.1+ CD43+, Bone marrow, avg-3                        | 2.32E-06 | 1.05E-02 | 3.88E-05 | 3.49E-04 | 36 | 423   |
| A3 | Coexpression Atlas | lungmap/P1_Endothelial_Subclass_Vascular Endothelial-E          | lungmap/P1_Endothelial_Subclass_Vascular Endothelial-E                                                    | 2.42E-06 | 1.09E-02 | 4.03E-05 | 3.62E-04 | 24 | 224   |
| A3 | Coexpression Atlas | lungmap/P3_Endothelial_Subclass_Endothelial-D                   | lungmap/P3_Endothelial_Subclass_Endothelial-D                                                             | 2.43E-06 | 1.10E-02 | 4.04E-05 | 3.64E-04 | 29 | 304   |
| A3 | Coexpression Atlas | gudmap_developingKidney_e15.5_Endothelial cells_100_k1          | DevelopingKidney_e15.5_Endothelial cells_emap-29965_k-means-cluster#1_top-relative-expression-ranked_100  | 2.47E-06 | 1.12E-02 | 4.09E-05 | 3.68E-04 | 9  | 34    |
| A3 | Coexpression Atlas | gudmap_developingKidney_e15.5_Pelvic Mesenchyme_1000_k2         | DevelopingKidney_e15.5_Pelvic Mesenchyme_emap-8241_k-means-cluster#2_top-relative-expression-ranked_1000  | 2.60E-06 | 1.17E-02 | 4.28E-05 | 3.85E-04 | 29 | 305   |
| A3 | Coexpression Atlas | gudmap_dev gonad_e13.5_M_InterstitFLeydig_MafB_500              | dev gonad_e13.5_M_InterstitFLeydig_MafB_top-relative-expression-ranked_500                                | 2.68E-06 | 1.21E-02 | 4.41E-05 | 3.96E-04 | 32 | 356   |
| A3 | Coexpression Atlas | gudmap_developingKidney_e15.5_Pelvic Mesenchyme_emap-           | DevelopingKidney_e15.5_Pelvic Mesenchyme_emap-                                                            | 2.70E-06 | 1.22E-02 | 4.42E-05 | 3.97E-04 | 22 | 195   |

|    |                    |                                                                        |                                                                                                                      |          |          |          |          |    |     |  |
|----|--------------------|------------------------------------------------------------------------|----------------------------------------------------------------------------------------------------------------------|----------|----------|----------|----------|----|-----|--|
|    | Atlas              | vic Mesenchyme_500_k4                                                  | 8241_k-means-cluster#4_top-relative-expression-ranked_500                                                            |          |          |          |          |    |     |  |
| A3 | Coexpression Atlas | gudmap_kidney_adult_Mesangium_Meis_200                                 | kidney_adult_Mesangium_Meis_top-relative-expression-ranked_200                                                       | 3.04E-06 | 1.37E-02 | 4.96E-05 | 4.46E-04 | 20 | 167 |  |
| A3 | Coexpression Atlas | gudmap_dev gonad_e12.5_M_InterstitLeydig_MafB_1000                     | dev gonad_e12.5_M_InterstitLeydig_MafB_top-relative-expression-ranked_1000                                           | 3.24E-06 | 1.46E-02 | 5.27E-05 | 4.74E-04 | 54 | 769 |  |
| A3 | Coexpression Atlas | gudmap_developingKidney_e15.5_Pelvic Mesenchyme_1000                   | DevelopingKidney_e15.5_Pelvic Mesenchyme_emap-8241_top-relative-expression-ranked_1000                               | 3.28E-06 | 1.48E-02 | 5.31E-05 | 4.78E-04 | 56 | 809 |  |
| A3 | Coexpression Atlas | gudmap_developingGonad_e18.5_testes_1000_k4                            | DevelopingGonad_e18.5_testes_emap-11164_k-means-cluster#4_top-relative-expression-ranked_1000                        | 3.50E-06 | 1.58E-02 | 5.64E-05 | 5.07E-04 | 28 | 293 |  |
| A3 | Coexpression Atlas | gudmap_dev gonad_e12.5_M_InterstitLeydig_MafB_k1_1000                  | dev gonad_e12.5_M_InterstitLeydig_MafB_k-means-cluster#1_top-relative-expression-ranked_1000                         | 3.82E-06 | 1.73E-02 | 6.15E-05 | 5.53E-04 | 29 | 311 |  |
| A3 | Coexpression Atlas | lungmap/P1_MyoFB_Subclass_MyoFB-F                                      | lungmap/P1_MyoFB_Subclass_MyoFB-F                                                                                    | 3.91E-06 | 1.77E-02 | 6.26E-05 | 5.63E-04 | 25 | 246 |  |
| A3 | Coexpression Atlas | gudmap_dev gonad_e12.5_M_InterstitTestis_Sma_1000                      | dev gonad_e12.5_M_InterstitTestis_Sma_top-relative-expression-ranked_1000                                            | 3.94E-06 | 1.78E-02 | 6.28E-05 | 5.65E-04 | 55 | 794 |  |
| A3 | Coexpression Atlas | gudmap_developingGonad_e18.5_testes_1000                               | DevelopingGonad_e18.5_testes_emap-11164_top-relative-expression-ranked_1000                                          | 3.95E-06 | 1.78E-02 | 6.28E-05 | 5.65E-04 | 56 | 814 |  |
| A3 | Coexpression Atlas | gudmap_dev lower uro neuro_e15.5_PelvicGanglion_Sox10_1000             | dev lower uro neuro_e15.5_PelvicGanglion_Sox10_top-relative-expression-ranked_1000                                   | 4.00E-06 | 1.81E-02 | 6.33E-05 | 5.70E-04 | 52 | 735 |  |
| A3 | Coexpression Atlas | gudmap_kidney_adult_GlomCapSys_Tie2_k4_100                             | kidney_adult_GlomCapSys_Tie2_k-means-cluster#4_top-relative-expression-ranked_100                                    | 4.16E-06 | 1.88E-02 | 6.57E-05 | 5.91E-04 | 9  | 36  |  |
| A3 | Coexpression Atlas | lungmap/P3_Epithelial_Subclass_AT1                                     | lungmap/P3_Epithelial_Subclass_AT1                                                                                   | 4.49E-06 | 2.03E-02 | 7.06E-05 | 6.35E-04 | 26 | 264 |  |
| A3 | Coexpression Atlas | gudmap_developingKidney_e15.5_stage III-IV renal corpusc_1000_k3       | DevelopingKidney_e15.5_stage III-IV renal corpusc_emap-27945_k-means-cluster#3_top-relative-expression-ranked_1000   | 4.72E-06 | 2.13E-02 | 7.40E-05 | 6.65E-04 | 15 | 103 |  |
| A3 | Coexpression Atlas | gudmap_kidney_adult_RenCorpuscGlomer_200                               | kidney_adult_RenCorpuscGlomer_top-relative-expression-ranked_200                                                     | 4.79E-06 | 2.17E-02 | 7.49E-05 | 6.74E-04 | 20 | 172 |  |
| A3 | Coexpression Atlas | PCBC_ratio_MESO-15 blastocyst_vs_MESO-15 amniotic fluid MSC_cfr-2X-p05 | MESO-15 blastocyst_vs_MESO-15 amniotic fluid MSC-Confounder_removed-fold2.0_adjp0.05                                 | 5.07E-06 | 2.29E-02 | 7.90E-05 | 7.11E-04 | 53 | 761 |  |
| A3 | Coexpression Atlas | Facebase_ST1_e8.5_NeuroEpith_FloorPlate_500_2                          | e8.5_NeuroEpith_FloorPlate_top-relative-expression-ranked_500_2                                                      | 5.23E-06 | 2.36E-02 | 8.12E-05 | 7.30E-04 | 30 | 333 |  |
| A3 | Coexpression Atlas | gudmap_developingLowerUrinaryTract_e13.5_bladder epithelial cells_1000 | DevelopingLowerUrinaryTract_e13.5_bladder epithelial cells_emap-30875_top-relative-expression-ranked_1000            | 5.29E-06 | 2.39E-02 | 8.18E-05 | 7.35E-04 | 54 | 782 |  |
| A3 | Coexpression Atlas | gudmap_developingLowerUrinaryTract_e13.5_bladder mesenchyme_1000_k2    | DevelopingLowerUrinaryTract_e13.5_bladder mesenchyme_emap-3087_k-means-cluster#2_top-relative-expression-ranked_1000 | 5.76E-06 | 2.60E-02 | 8.89E-05 | 7.99E-04 | 14 | 92  |  |
| A3 | Coexpression Atlas | GSM791117_500                                                          | Stem Cells, SC.CMP.BM, Lineage- Kit+ Sca1- CD34+ FcgRlow, Bone marrow, avg-2                                         | 5.91E-06 | 2.67E-02 | 9.08E-05 | 8.17E-04 | 29 | 318 |  |
| A3 | Coexpression Atlas | GSM605862_500                                                          | Myeloid Cells, MF.Thio5.II-480hi.PC, CD115+ MHC II-F480hi Siglec F-, Peritoneal Cavity, avg-3                        | 5.96E-06 | 2.69E-02 | 9.13E-05 | 8.21E-04 | 36 | 441 |  |
| A3 | Coexpression Atlas | lungmap/P3_MatrixFB_Subclass_MatrixFB-A                                | lungmap/P3_MatrixFB_Subclass_MatrixFB-A                                                                              | 6.00E-06 | 2.71E-02 | 9.13E-05 | 8.21E-04 | 25 | 252 |  |

|    |                    |                                                                 |                                                                                                            |          |          |          |          |     |       |
|----|--------------------|-----------------------------------------------------------------|------------------------------------------------------------------------------------------------------------|----------|----------|----------|----------|-----|-------|
| A3 | Coexpression Atlas | lungmap/P1_Endothelial_Subclass_Lymphatic Endothelial-B         | lungmap/P1_Endothelial_Subclass_Lymphatic Endothelial-B                                                    | 6.00E-06 | 2.71E-02 | 9.13E-05 | 8.21E-04 | 24  | 236   |
| A3 | Coexpression Atlas | Facebase_RNAseq_e9.5_Maxillary Arch_1000                        | FacebaseRNAseq_e9.5_Maxillary Arch_top-relative-expression-ranked_1000                                     | 6.13E-06 | 2.77E-02 | 9.29E-05 | 8.35E-04 | 63  | 969   |
| A3 | Coexpression Atlas | gudmap_developingLowerUrinaryTract_P1_bladder_500_J             | DevelopingLowerUrinaryTract_P1_bladder_J_emap-30374_top-relative-expression-ranked_500                     | 6.87E-06 | 3.10E-02 | 1.04E-04 | 9.33E-04 | 33  | 390   |
| A3 | Coexpression Atlas | brainmap/Mixed Age_intermediate_Subclass_intermediate1          | brainmap/Mixed Age_intermediate_Subclass_intermediate1                                                     | 7.03E-06 | 3.18E-02 | 1.06E-04 | 9.52E-04 | 30  | 338   |
| A3 | Coexpression Atlas | gudmap_developingKidney_e15.5_S-shaped body_1000                | DevelopingKidney_e15.5_S-shaped body_emap-27855_top-relative-expression-ranked_1000                        | 7.32E-06 | 3.31E-02 | 1.10E-04 | 9.88E-04 | 55  | 811   |
| A3 | Coexpression Atlas | gudmap_kidney_P0_JuxtaGlom_Ren1_200                             | kidney_P0_JuxtaGlom_Ren1_top-relative-expression-ranked_200                                                | 7.42E-06 | 3.35E-02 | 1.11E-04 | 9.98E-04 | 20  | 177   |
| A3 | Coexpression Atlas | gudmap_developingLowerUrinaryTract_adult_bladder_1000_k1        | DevelopingLowerUrinaryTract_adult_bladder_emap-29457_k-means-cluster#1_top-relative-expression-ranked_1000 | 7.55E-06 | 3.41E-02 | 1.12E-04 | 1.01E-03 | 18  | 148   |
| A3 | Coexpression Atlas | gudmap_dev gonad_e13.5_M_InterstitTestis_Sma_200                | dev gonad_e13.5_M_InterstitTestis_Sma_top-relative-expression-ranked_200                                   | 7.55E-06 | 3.41E-02 | 1.12E-04 | 1.01E-03 | 18  | 148   |
| A3 | Coexpression Atlas | PCBC_ratio_EB_vs_SC_cfr-2X-p05                                  | Embryoid Body Cells_vs_Pluripotent Stem Cells-Confounder_removed-fold2.0_adjp0.05                          | 7.62E-06 | 3.44E-02 | 1.13E-04 | 1.02E-03 | 102 | 1,823 |
| A3 | Coexpression Atlas | facebase_RNAseq_e14.5_palate_posterior_proximal_ERK2_WT_2500_K2 | facebase_RNAseq_e14.5_palate_posterior_proximal_ERK2_WT_2500_K2                                            | 8.00E-06 | 3.61E-02 | 1.18E-04 | 1.06E-03 | 74  | 1,209 |
| A3 | Coexpression Atlas | gudmap_dev gonad_e12.5_F_VasAssMesen_MafB_k1_200                | dev gonad_e12.5_F_VasAssMesen_MafB_k-means-cluster#1_top-relative-expression-ranked_200                    | 8.49E-06 | 3.83E-02 | 1.25E-04 | 1.12E-03 | 9   | 39    |
| A3 | Coexpression Atlas | lungmap/P1_Endothelial_Subclass_Vascular Endothelial-D          | lungmap/P1_Endothelial_Subclass_Vascular Endothelial-D                                                     | 8.56E-06 | 3.87E-02 | 1.26E-04 | 1.13E-03 | 23  | 225   |
| A3 | Coexpression Atlas | gudmap_developingKidney_e15.5_Podocyte cells_1000               | DevelopingKidney_e15.5_Podocyte cells_emap-27915_top-relative-expression-ranked_1000                       | 8.66E-06 | 3.91E-02 | 1.27E-04 | 1.14E-03 | 56  | 836   |
| A3 | Coexpression Atlas | gudmap_dev gonad_e11.5_F_ReproVasc_Flk_k3_100                   | dev gonad_e11.5_F_ReproVasc_Flk_k-means-cluster#3_top-relative-expression-ranked_100                       | 8.70E-06 | 3.93E-02 | 1.27E-04 | 1.14E-03 | 7   | 22    |
| A3 | Coexpression Atlas | lungmap/P1_MatrixFB_Subclass_MatrixFB-E                         | lungmap/P1_MatrixFB_Subclass_MatrixFB-E                                                                    | 8.78E-06 | 3.97E-02 | 1.27E-04 | 1.14E-03 | 26  | 274   |
| A3 | Coexpression Atlas | gudmap_kidney_adult_JuxtaGlom_Ren1_Captopr_k4_1000              | kidney_adult_JuxtaGlom_Ren1_Captopr_k-means-cluster#4_top-relative-expression-ranked_1000                  | 8.79E-06 | 3.97E-02 | 1.27E-04 | 1.14E-03 | 20  | 179   |
| A3 | Coexpression Atlas | gudmap_dev gonad_e12.5_F_VasAssocMesStromOvary_Sma_1000         | dev gonad_e12.5_F_VasAssocMesStromOvary_Sma_top-relative-expression-ranked_1000                            | 9.44E-06 | 4.26E-02 | 1.36E-04 | 1.22E-03 | 54  | 798   |
| A3 | Coexpression Atlas | gudmap_kidney_e10.5_UretericTrunk_HoxB7_500                     | kidney_e10.5_UretericTrunk_HoxB7_top-relative-expression-ranked_500                                        | 9.45E-06 | 4.27E-02 | 1.36E-04 | 1.22E-03 | 33  | 396   |
| A3 | Coexpression Atlas | endothelial-mural Subclass Vend1                                | endothelial-mural Subclass Vend1                                                                           | 9.79E-06 | 4.42E-02 | 1.40E-04 | 1.26E-03 | 36  | 451   |
| A3 | Coexpression Atlas | GSM854335_500                                                   | alpha beta T cells, preT.ETP.Th, Lin-/lo CD25- CD44+ cKit+, Thymus, avg-3                                  | 9.97E-06 | 4.50E-02 | 1.43E-04 | 1.28E-03 | 34  | 415   |
| A3 | Coexpression Atlas | gudmap_developingLowerUrinaryTract_P1_ureter_1000_k4            | DevelopingLowerUrinaryTract_P1_ureter_emap-30363_k-means-cluster#4_top-relative-expression-ranked_1000     | 1.00E-05 | 4.52E-02 | 1.43E-04 | 1.28E-03 | 18  | 151   |
| A3 | Coexpression Atlas | gudmap_kidney_adult_RenMedVasc_                                 | kidney_adult_RenMedVasc_Tie2_top-relative-expression-                                                      | 1.02E-05 | 4.62E-02 | 1.45E-04 | 1.31E-03 | 13  | 84    |



|    | Atlas         | Tie2_100         | ranked_100                                                                                                                                       |          |          |          |          |     |       |
|----|---------------|------------------|--------------------------------------------------------------------------------------------------------------------------------------------------|----------|----------|----------|----------|-----|-------|
| A3 | Computational | M16395 MODULE_47 | ECM and collagens.                                                                                                                               | 5.24E-09 | 3.84E-06 | 3.84E-06 | 2.75E-05 | 32  | 225   |
| A3 | Computational | M9982 MODULE_2   | DRG (dorsal root ganglia) genes.                                                                                                                 | 4.72E-07 | 3.46E-04 | 1.73E-04 | 1.24E-03 | 40  | 384   |
| A3 | Computational | M4051 MODULE_1   | Ovary genes.                                                                                                                                     | 1.90E-05 | 1.39E-02 | 4.64E-03 | 3.33E-02 | 35  | 368   |
| A3 | Drug          | D004237          | Diuron                                                                                                                                           | 1.10E-27 | 3.51E-23 | 3.51E-23 | 3.84E-22 | 153 | 1,722 |
| A3 | Drug          | C041786          | palm oil                                                                                                                                         | 8.90E-22 | 2.83E-17 | 1.42E-17 | 1.55E-16 | 138 | 1,675 |
| A3 | Drug          | C057693          | troglitazone                                                                                                                                     | 7.58E-12 | 2.41E-07 | 7.15E-08 | 7.82E-07 | 95  | 1,306 |
| A3 | Drug          | D015056          | 1-Methyl-3-isobutylxanthine                                                                                                                      | 8.98E-12 | 2.86E-07 | 7.15E-08 | 7.82E-07 | 44  | 391   |
| A3 | Drug          | C006703          | benzo(b)fluoranthene                                                                                                                             | 3.52E-11 | 1.12E-06 | 2.24E-07 | 2.45E-06 | 89  | 1,222 |
| A3 | Drug          | C089730          | rosiglitazone                                                                                                                                    | 1.78E-09 | 5.65E-05 | 9.42E-06 | 1.03E-04 | 100 | 1,552 |
| A3 | Drug          | C023035          | 3,4,5,3',4'-pentachlorobiphenyl                                                                                                                  | 3.63E-09 | 1.16E-04 | 1.65E-05 | 1.81E-04 | 81  | 1,174 |
| A3 | Drug          | C548651          | 2-(1'H-indolo-3'-carbonyl)thiazole-4-carboxylic acid methyl ester                                                                                | 7.20E-09 | 2.29E-04 | 2.86E-05 | 3.13E-04 | 61  | 793   |
| A3 | Drug          | C015559          | trimellitic anhydride                                                                                                                            | 8.20E-09 | 2.61E-04 | 2.90E-05 | 3.17E-04 | 112 | 1,862 |
| A3 | Drug          | D004113          | Succimer                                                                                                                                         | 1.63E-08 | 5.18E-04 | 5.18E-05 | 5.67E-04 | 82  | 1,235 |
| A3 | Drug          | D007545          | Isoproterenol                                                                                                                                    | 2.10E-08 | 6.68E-04 | 6.07E-05 | 6.65E-04 | 70  | 995   |
| A3 | Drug          | C011559          | tributyltin                                                                                                                                      | 7.85E-08 | 2.50E-03 | 2.08E-04 | 2.28E-03 | 32  | 316   |
| A3 | Drug          | D058185          | Magnetite Nanoparticles                                                                                                                          | 1.56E-07 | 4.95E-03 | 3.81E-04 | 4.17E-03 | 81  | 1,280 |
| A3 | Drug          | C023036          | perfluorooctanoic acid                                                                                                                           | 1.96E-07 | 6.25E-03 | 4.27E-04 | 4.67E-03 | 97  | 1,638 |
| A3 | Drug          | D019324          | beta-Naphthoflavone                                                                                                                              | 2.01E-07 | 6.40E-03 | 4.27E-04 | 4.67E-03 | 58  | 810   |
| A3 | Drug          | D003561          | Cytarabine                                                                                                                                       | 2.16E-07 | 6.88E-03 | 4.30E-04 | 4.71E-03 | 47  | 598   |
| A3 | Drug          | C009277          | sodium arsenate                                                                                                                                  | 3.48E-07 | 1.11E-02 | 6.51E-04 | 7.12E-03 | 98  | 1,681 |
| A3 | Drug          | CID000082145     | 2-bromopalmitate                                                                                                                                 | 3.86E-07 | 1.23E-02 | 6.83E-04 | 7.47E-03 | 13  | 66    |
| A3 | Drug          | 4282_UP          | Hydralazine hydrochloride [304-20-1]; Up 200; 20.4uM; PC3; HT_HG-U133A                                                                           | 5.28E-07 | 1.68E-02 | 8.84E-04 | 9.67E-03 | 23  | 199   |
| A3 | Drug          | C016030          | pantogab                                                                                                                                         | 7.46E-07 | 2.37E-02 | 1.14E-03 | 1.25E-02 | 45  | 586   |
| A3 | Drug          | C410127          | PCB 180                                                                                                                                          | 7.53E-07 | 2.40E-02 | 1.14E-03 | 1.25E-02 | 93  | 1597  |
| A3 | Drug          | C510784          | ormosil                                                                                                                                          | 1.27E-06 | 4.03E-02 | 1.83E-03 | 2.00E-02 | 18  | 136   |
| A3 | Drug          | C550453          | dioxinodehydroeckol                                                                                                                              | 1.38E-06 | 4.38E-02 | 1.90E-03 | 2.08E-02 | 6   | 12    |
| A4 | Pubmed        | 23020937         | Range of genetic mutations associated with severe non-syndromic sporadic intellectual disability: an exome sequencing study.                     | 1.11E-06 | 2.82E-03 | 2.61E-03 | 2.20E-02 | 2   | 2     |
| A4 | Pubmed        | 25162404         | G protein beta 5 is targeted to D2-dopamine receptor-containing biochemical compartments and blocks dopamine-dependent receptor internalization. | 3.32E-06 | 8.45E-03 | 2.61E-03 | 2.20E-02 | 2   | 3     |
| A4 | Pubmed        | 16204458         | Non-EST based prediction of exon skipping and intron retention events using Pfam information.                                                    | 3.32E-06 | 8.45E-03 | 2.61E-03 | 2.20E-02 | 2   | 3     |
| A4 | Pubmed        | 16710414         | The DNA sequence and biological annotation of human chromosome 1.                                                                                | 1.31E-05 | 3.33E-02 | 2.61E-03 | 2.20E-02 | 8   | 1,034 |
| A4 | Pubmed        | 23020937         | Range of genetic mutations associated with severe non-syndromic sporadic intellectual disability: an exome sequencing study.                     | 1.11E-06 | 2.82E-03 | 2.61E-03 | 2.20E-02 | 2   | 2     |

|    |                        |            |                                                                                                                                                                                                                                                     |          |          |          |          |   |       |
|----|------------------------|------------|-----------------------------------------------------------------------------------------------------------------------------------------------------------------------------------------------------------------------------------------------------|----------|----------|----------|----------|---|-------|
| A4 | Pubmed                 | 25162404   | G protein beta 5 is targeted to D2-dopamine receptor-containing biochemical compartments and blocks dopamine-dependent receptor internalization.                                                                                                    | 3.32E-06 | 8.45E-03 | 2.61E-03 | 2.20E-02 | 2 | 3     |
| A4 | Pubmed                 | 16204458   | Non-EST based prediction of exon skipping and intron retention events using Pfam information.                                                                                                                                                       | 3.32E-06 | 8.45E-03 | 2.61E-03 | 2.20E-02 | 2 | 3     |
| A4 | Pubmed                 | 16710414   | The DNA sequence and biological annotation of human chromosome 1.                                                                                                                                                                                   | 1.31E-05 | 3.33E-02 | 2.61E-03 | 2.20E-02 | 8 | 1,034 |
| A5 | GO: Cellular Component | GO:0044420 | extracellular matrix component                                                                                                                                                                                                                      | 1.41E-05 | 2.25E-03 | 1.38E-03 | 7.79E-03 | 5 | 141   |
| A5 | GO: Cellular Component | GO:0005578 | proteinaceous extracellular matrix                                                                                                                                                                                                                  | 1.72E-05 | 2.75E-03 | 1.38E-03 | 7.79E-03 | 7 | 379   |
| A5 | GO: Cellular Component | GO:0031012 | extracellular matrix                                                                                                                                                                                                                                | 4.73E-05 | 7.57E-03 | 2.52E-03 | 1.43E-02 | 7 | 444   |
| A5 | Human Phenotype        | HP:0005622 | Broad long bones                                                                                                                                                                                                                                    | 3.10E-06 | 2.37E-03 | 2.37E-03 | 1.71E-02 | 3 | 10    |
| A5 | Pubmed                 | 19578796   | Association of genetic variants with chronic kidney disease in individuals with different lipid profiles.                                                                                                                                           | 1.84E-07 | 1.19E-03 | 8.21E-04 | 7.68E-03 | 5 | 152   |
| A5 | Pubmed                 | 26915435   | The anti-oxidative transcription factor Nuclear factor E2 related factor-2 (Nrf2) counteracts TGF- $\beta$ 1 mediated growth inhibition of pancreatic ductal epithelial cells - Nrf2 as determinant of pro-tumorigenic functions of TGF- $\beta$ 1. | 6.80E-07 | 4.38E-03 | 8.21E-04 | 7.68E-03 | 2 | 2     |
| A5 | Pubmed                 | 26226105   | The Crosstalk between Nrf2 and TGF- $\beta$ 1 in the Epithelial-Mesenchymal Transition of Pancreatic Duct Epithelial Cells.                                                                                                                         | 6.80E-07 | 4.38E-03 | 8.21E-04 | 7.68E-03 | 2 | 2     |
| A5 | Pubmed                 | 19389097   | Intense pulsed light effects on the expression of extracellular matrix proteins and transforming growth factor beta-1 in skin dermal fibroblasts cultured within contracted collagen lattices.                                                      | 6.80E-07 | 4.38E-03 | 8.21E-04 | 7.68E-03 | 2 | 2     |
| A5 | Pubmed                 | 17146610   | Expression of decorin and collagens I and III in different layers of human skin in vivo: a laser capture microdissection study.                                                                                                                     | 2.04E-06 | 1.31E-02 | 8.21E-04 | 7.68E-03 | 2 | 3     |
| A5 | Pubmed                 | 27997896   | Elevated THBS2, COL1A2, and SPP1 Expression Levels as Predictors of Gastric Cancer Prognosis.                                                                                                                                                       | 2.04E-06 | 1.31E-02 | 8.21E-04 | 7.68E-03 | 2 | 3     |
| A5 | Pubmed                 | 21858035   | The role of serum biomarkers in predicting fibrosis progression in pediatric and adult hepatitis C virus chronic infection.                                                                                                                         | 2.04E-06 | 1.31E-02 | 8.21E-04 | 7.68E-03 | 2 | 3     |
| A5 | Pubmed                 | 25851604   | The human 18S rRNA base methyltransferases DIMT1L and WBSR22-TRMT112 but not rRNA modification are required for ribosome biogenesis.                                                                                                                | 2.04E-06 | 1.31E-02 | 8.21E-04 | 7.68E-03 | 2 | 3     |
| A5 | Pubmed                 | 22379029   | TGF- $\beta$ -mediated downregulation of microRNA-196a contributes to the constitutive upregulated type I collagen expression in scleroderma dermal fibroblasts.                                                                                    | 2.04E-06 | 1.31E-02 | 8.21E-04 | 7.68E-03 | 2 | 3     |
| A5 | Pubmed                 | 24641356   | In Crohn's disease fibrosis-reduced expression of the miR-29 family enhances collagen expression in intestinal fibroblasts.                                                                                                                         | 2.04E-06 | 1.31E-02 | 8.21E-04 | 7.68E-03 | 2 | 3     |
| A5 | Pubmed                 | 20704113   | Effects of antisense transforming growth factor-beta1 gene transfer on the biological activities of tendon sheath fibroblasts.                                                                                                                      | 2.04E-06 | 1.31E-02 | 8.21E-04 | 7.68E-03 | 2 | 3     |

|    |        |          |                                                                                                                                                                                                                                      |          |          |          |          |   |   |
|----|--------|----------|--------------------------------------------------------------------------------------------------------------------------------------------------------------------------------------------------------------------------------------|----------|----------|----------|----------|---|---|
| A5 | Pubmed | 19858036 | Hepatocyte growth factor suppresses transforming growth factor-beta-1 and type III collagen in human primary renal fibroblasts.                                                                                                      | 2.04E-06 | 1.31E-02 | 8.21E-04 | 7.68E-03 | 2 | 3 |
| A5 | Pubmed | 16463783 | [The influence of adrenaline on the expression of TGF-beta1, bFGF and I procollagen for hypertrophic scar].                                                                                                                          | 2.04E-06 | 1.31E-02 | 8.21E-04 | 7.68E-03 | 2 | 3 |
| A5 | Pubmed | 21667357 | The identification of novel mutations in COL1A1, COL1A2, and LEPRE1 genes in Chinese patients with osteogenesis imperfecta.                                                                                                          | 2.04E-06 | 1.31E-02 | 8.21E-04 | 7.68E-03 | 2 | 3 |
| A5 | Pubmed | 25451260 | Role of Flightless-I (Drosophila) homolog in the transcription activation of type I collagen gene mediated by transforming growth factor beta.                                                                                       | 2.04E-06 | 1.31E-02 | 8.21E-04 | 7.68E-03 | 2 | 3 |
| A5 | Pubmed | 26904167 | TGF-? and Hypoxia/Reoxygenation Promote Radioresistance of A549 Lung Cancer Cells through Activation of Nrf2 and EGFR.                                                                                                               | 2.04E-06 | 1.31E-02 | 8.21E-04 | 7.68E-03 | 2 | 3 |
| A5 | Pubmed | 18996919 | Mutation and polymorphism spectrum in osteogenesis imperfecta type II: implications for genotype-phenotype relationships.                                                                                                            | 4.07E-06 | 2.63E-02 | 1.01E-03 | 9.44E-03 | 2 | 4 |
| A5 | Pubmed | 26258650 | Dysregulation of the Transforming Growth Factor ? Pathway in Induced Pluripotent Stem Cells Generated from Patients with Diamond Blackfan Anemia.                                                                                    | 4.07E-06 | 2.63E-02 | 1.01E-03 | 9.44E-03 | 2 | 4 |
| A5 | Pubmed | 26238954 | A Preliminary Study on Racial Differences in 絶쟁 MOX1, NFE2L2, and TGF?1 Gene Polymorphisms and Radiation-Induced Late Normal Tissue Toxicity.                                                                                        | 4.07E-06 | 2.63E-02 | 1.01E-03 | 9.44E-03 | 2 | 4 |
| A5 | Pubmed | 17884818 | Transforming growth factor-beta regulates DNA binding activity of transcription factor Fli1 by p300/CREB-binding protein-associated factor-dependent acetylation.                                                                    | 4.07E-06 | 2.63E-02 | 1.01E-03 | 9.44E-03 | 2 | 4 |
| A5 | Pubmed | 16849317 | RACK1 binds to Smad3 to modulate transforming growth factor-beta1-stimulated alpha2(I) collagen transcription in renal tubular epithelial cells.                                                                                     | 4.07E-06 | 2.63E-02 | 1.01E-03 | 9.44E-03 | 2 | 4 |
| A5 | Pubmed | 24434151 | Inhibitory role of Id1 on TGF-?-induced collagen expression in human dermal fibroblasts.                                                                                                                                             | 4.07E-06 | 2.63E-02 | 1.01E-03 | 9.44E-03 | 2 | 4 |
| A5 | Pubmed | 1409674  | Activation of expression of genes coding for extracellular matrix proteins in Tat-producing glioblastoma cells.                                                                                                                      | 4.07E-06 | 2.63E-02 | 1.01E-03 | 9.44E-03 | 2 | 4 |
| A5 | Pubmed | 18089612 | Thrombospondin-1 and thrombospondin-2 mRNA and TSP-1 and TSP-2 protein expression in uterine fibroids and correlation to the genes COL1A1 and COL3A1 and to the collagen cross-link hydroxyproline.                                  | 4.07E-06 | 2.63E-02 | 1.01E-03 | 9.44E-03 | 2 | 4 |
| A5 | Pubmed | 24361166 | Relationship between the expressions of mitofusin-2 and procollagen in uterosacral ligament fibroblasts of postmenopausal patients with pelvic organ prolapse.                                                                       | 4.07E-06 | 2.63E-02 | 1.01E-03 | 9.44E-03 | 2 | 4 |
| A5 | Pubmed | 19932771 | MMP-12 catalytic domain recognizes and cleaves at multiple sites in human skin collagen type I and type III.                                                                                                                         | 4.07E-06 | 2.63E-02 | 1.01E-03 | 9.44E-03 | 2 | 4 |
| A5 | Pubmed | 18298657 | Chondroitin sulphate decreases collagen synthesis in normal and scleroderma fibroblasts through a Smad-independent TGF-beta pathway--implication of C-Krox and Sp1.                                                                  | 6.79E-06 | 4.37E-02 | 1.46E-03 | 1.36E-02 | 2 | 5 |
| A5 | Pubmed | 19790048 | Hypoxia-inducible factor 1alpha inhibits the fibroblast-like markers type I and type III collagen during hypoxia-induced chondrocyte redifferentiation: hypoxia not only induces type II collagen and aggrecan, but it also inhibits | 6.79E-06 | 4.37E-02 | 1.46E-03 | 1.36E-02 | 2 | 5 |

|    |                        |                   |                                                                                                                                                                        |          |          |          |          |   |    |
|----|------------------------|-------------------|------------------------------------------------------------------------------------------------------------------------------------------------------------------------|----------|----------|----------|----------|---|----|
|    |                        |                   | type I and type III collagen in the hypoxia-inducible factor 1 alpha-dependent redifferentiation of chondrocytes.                                                      |          |          |          |          |   |    |
| A5 | Pubmed                 | 15365990          | Stability related bias in residues replacing glycines within the collagen triple helix (Gly-Xaa-Yaa) in inherited connective tissue disorders.                         | 6.79E-06 | 4.37E-02 | 1.46E-03 | 1.36E-02 | 2 | 5  |
| A5 | Pubmed                 | 9675033           | Decorin core protein fragment Leu155-Val260 interacts with TGF-beta but does not compete for decorin binding to type I collagen.                                       | 6.79E-06 | 4.37E-02 | 1.46E-03 | 1.36E-02 | 2 | 5  |
| A5 | Cytoband               | 2q31              | 2q31                                                                                                                                                                   | 1.22E-04 | 4.87E-03 | 4.87E-03 | 2.08E-02 | 2 | 13 |
| A5 | Cytoband               | 12q14.1           | 12q14.1                                                                                                                                                                | 5.83E-04 | 2.33E-02 | 1.17E-02 | 4.99E-02 | 2 | 28 |
| A5 | Computational          | M12987 GNF2_CDH11 | Neighborhood of CDH11                                                                                                                                                  | 2.04E-05 | 3.24E-03 | 3.24E-03 | 1.83E-02 | 3 | 25 |
| A5 | Computational          | M11282 GNF2_PTX3  | Neighborhood of PTX3                                                                                                                                                   | 6.23E-05 | 9.90E-03 | 4.95E-03 | 2.80E-02 | 3 | 36 |
| A5 | Drug                   | C502971           | 2-phenyl-4-(3-pyridin-2-yl-1H-pyrazol-4-yl)pyridine                                                                                                                    | 1.47E-07 | 1.14E-03 | 1.14E-03 | 1.08E-02 | 3 | 6  |
| A6 | Pubmed                 | 18303054          | IKAP localizes to membrane ruffles with filamin A and regulates actin cytoskeleton organization and cell migration.                                                    | 3.68E-05 | 4.58E-02 | 1.78E-03 | 1.37E-02 | 2 | 17 |
| A7 | GO: Cellular Component | GO:0060203        | Clathrin-sculpted glutamate transport vesicle membrane                                                                                                                 | 6.84E-05 | 1.59E-02 | 7.93E-03 | 4.78E-02 | 2 | 4  |
| A7 | GO: Cellular Component | GO:0060199        | Clathrin-sculpted glutamate transport vesicle                                                                                                                          | 6.84E-05 | 1.59E-02 | 7.93E-03 | 4.78E-02 | 2 | 4  |
| A7 | Pubmed                 | 24728074          | Enhanced prediction of Src homology 2 (SH2) domain binding potentials using a fluorescence polarization-derived c-Met, c-Kit, ErbB, and androgen receptor interactome. | 1.59E-06 | 7.91E-03 | 4.21E-03 | 3.82E-02 | 4 | 63 |
| A7 | Pubmed                 | 23799130          | Expression of ST3GAL4 leads to SLe(x) expression and induces c-Met activation and an invasive phenotype in gastric carcinoma cells.                                    | 5.20E-06 | 2.58E-02 | 4.21E-03 | 3.82E-02 | 2 | 3  |
| A7 | Pubmed                 | 25612003          | Pathologic Regulation of Collagen I by an Aberrant Protein Phosphatase 2A/Histone Deacetylase C4/MicroRNA-29 Signal Axis in Idiopathic Pulmonary Fibrosis Fibroblasts. | 5.20E-06 | 2.58E-02 | 4.21E-03 | 3.82E-02 | 2 | 3  |
| A7 | Pubmed                 | 19543515          | Differential methylation pattern of ID4, SFRP1, and SHP1 between acute myeloid leukemia and chronic myeloid leukemia.                                                  | 5.20E-06 | 2.58E-02 | 4.21E-03 | 3.82E-02 | 2 | 3  |
| A8 | GO: Cellular Component | GO:0060203        | Clathrin-sculpted glutamate transport vesicle membrane                                                                                                                 | 6.84E-05 | 1.59E-02 | 7.93E-03 | 4.78E-02 | 2 | 4  |
| A8 | GO: Cellular Component | GO:0060199        | Clathrin-sculpted glutamate transport vesicle                                                                                                                          | 6.84E-05 | 1.59E-02 | 7.93E-03 | 4.78E-02 | 2 | 4  |
| A8 | Pubmed                 | 24728074          | Enhanced prediction of Src homology 2 (SH2) domain binding potentials using a fluorescence polarization-derived c-Met, c-Kit, ErbB, and androgen receptor interactome. | 1.59E-06 | 7.91E-03 | 4.21E-03 | 3.82E-02 | 4 | 63 |
| A8 | Pubmed                 | 23799130          | Expression of ST3GAL4 leads to SLe(x) expression and induces c-Met activation and an invasive phenotype in gastric carcinoma cells.                                    | 5.20E-06 | 2.58E-02 | 4.21E-03 | 3.82E-02 | 2 | 3  |
| A8 | Pubmed                 | 25612003          | Pathologic Regulation of Collagen I by an Aberrant Protein Phosphatase 2A/Histone Deacetylase C4/MicroRNA-29 Signal Axis in Idiopathic Pulmonary Fibrosis Fibroblasts. | 5.20E-06 | 2.58E-02 | 4.21E-03 | 3.82E-02 | 2 | 3  |
| A8 | Pubmed                 | 19543515          | Differential methylation pattern of ID4, SFRP1, and SHP1                                                                                                               | 5.20E-06 | 2.58E-02 | 4.21E-03 | 3.82E-02 | 2 | 3  |

|    |                        |                   |                                                                                                                                                                               |          |          |          |          |   |     |
|----|------------------------|-------------------|-------------------------------------------------------------------------------------------------------------------------------------------------------------------------------|----------|----------|----------|----------|---|-----|
|    |                        |                   | between acute myeloid leukemia and chronic myeloid leukemia.                                                                                                                  |          |          |          |          |   |     |
| B3 | Pubmed                 | 20333644          | Beta1 integrins mediate cell proliferation in three-dimensional cultures by regulating expression of the sonic hedgehog effector protein, GLI1.                               | 1.69E-06 | 8.85E-03 | 2.21E-03 | 2.02E-02 | 2 | 2   |
| B3 | Pubmed                 | 18727519          | [Expression and significance of integrin beta1 and integrin-linked kinase in laryngeal carcinoma].                                                                            | 1.69E-06 | 8.85E-03 | 2.21E-03 | 2.02E-02 | 2 | 2   |
| B3 | Pubmed                 | 21639857          | Effect of dexamethasone on human osteoblasts in culture: involvement of ?1 integrin and integrin-linked kinase.                                                               | 1.69E-06 | 8.85E-03 | 2.21E-03 | 2.02E-02 | 2 | 2   |
| B3 | Pubmed                 | 12020426          | Ionizing radiation induces up-regulation of functional beta1-integrin in human lung tumor cell lines in vitro.                                                                | 1.69E-06 | 8.85E-03 | 2.21E-03 | 2.02E-02 | 2 | 2   |
| B3 | Pubmed                 | 15304053          | The regulation of integrin-linked kinase in human platelets: evidence for involvement in the regulation of integrin alpha 2 beta 1.                                           | 5.05E-06 | 2.65E-02 | 2.94E-03 | 2.69E-02 | 2 | 3   |
| B3 | Pubmed                 | 22345562          | Insulin-like growth factor-binding protein 2-driven glioma progression is prevented by blocking a clinically significant integrin, integrin-linked kinase, and NF-?B network. | 5.05E-06 | 2.65E-02 | 2.94E-03 | 2.69E-02 | 2 | 3   |
| B3 | Pubmed                 | 26693891          | Twist induces epithelial-mesenchymal transition and cell motility in breast cancer via ITGB1-FAK/ILK signaling axis and its associated downstream network.                    | 5.05E-06 | 2.65E-02 | 2.94E-03 | 2.69E-02 | 2 | 3   |
| B3 | Pubmed                 | 15905178          | Role of integrin-linked kinase in regulating phosphorylation of Akt and fibroblast survival in type I collagen matrices through a beta1 integrin viability signaling pathway. | 5.05E-06 | 2.65E-02 | 2.94E-03 | 2.69E-02 | 2 | 3   |
| B3 | Pubmed                 | 28188308          | Tetraspanin 8 is a novel regulator of ILK-driven ?1 integrin adhesion and signaling in invasive melanoma cells.                                                               | 5.05E-06 | 2.65E-02 | 2.94E-03 | 2.69E-02 | 2 | 3   |
| B3 | Computational          | M9347 MODULE_176  | Signaling.                                                                                                                                                                    | 1.82E-06 | 4.17E-04 | 4.17E-04 | 2.51E-03 | 8 | 230 |
| B3 | Computational          | M16447 MODULE_112 | Genes in the cancer module 112.                                                                                                                                               | 4.54E-06 | 1.04E-03 | 5.20E-04 | 3.12E-03 | 8 | 260 |
| B3 | Computational          | M9982 MODULE_2    | DRG (dorsal root ganglia) genes.                                                                                                                                              | 7.61E-05 | 1.74E-02 | 5.81E-03 | 3.49E-02 | 8 | 384 |
| B4 | Pubmed                 | 15749123          | Ethanol potentiates HIV-1 gp120-induced apoptosis in human neurons via both the death receptor and NMDA receptor pathways.                                                    | 2.46E-05 | 1.78E-02 | 2.51E-03 | 1.79E-02 | 2 | 14  |
| B5 | Pubmed                 | 10343102          | Assignment of a human cold shock domain protein A intronless pseudogene (CSDAP1) to human chromosome 16 band p11.2 by in situ hybridization.                                  | 1.10E-07 | 1.36E-04 | 1.36E-04 | 1.05E-03 | 2 | 2   |
| B5 | Gene Family            | 1010              | Cytochrome P450 family 20                                                                                                                                                     | 6.60E-04 | 7.92E-03 | 3.96E-03 | 1.23E-02 | 1 | 1   |
| B5 | Gene Family            | 1015              | Cytochrome P450 family 39                                                                                                                                                     | 6.60E-04 | 7.92E-03 | 3.96E-03 | 1.23E-02 | 1 | 1   |
| B5 | Gene Family            | 106               | Y box binding proteins                                                                                                                                                        | 1.98E-03 | 2.37E-02 | 7.91E-03 | 2.46E-02 | 1 | 3   |
| B5 | Gene Family            | 1127              | Phospholipid phosphatase related                                                                                                                                              | 3.29E-03 | 3.95E-02 | 9.88E-03 | 3.07E-02 | 1 | 5   |
| B5 | Coexpression           | M9814             | Genes down-regulated in poorly differentiated thyroid carcinoma (PDTc) compared to anaplastic thyroid carcinoma (ATC).                                                        | 2.61E-07 | 4.02E-04 | 4.02E-04 | 3.19E-03 | 4 | 77  |
| B6 | GO: Cellular Component | GO:0030016        | Myofibril                                                                                                                                                                     | 1.07E-08 | 6.18E-07 | 4.21E-07 | 1.96E-06 | 5 | 220 |
| B6 | GO: Cellular Component | GO:0043292        | Contractile fiber                                                                                                                                                             | 1.45E-08 | 8.42E-07 | 4.21E-07 | 1.96E-06 | 5 | 234 |
| B6 | GO: Cellular Component | GO:0030017        | Sarcomere                                                                                                                                                                     | 7.65E-07 | 4.44E-05 | 1.48E-05 | 6.88E-05 | 4 | 198 |

|    | Component              |              |                                                                                                                               |          |          |          |          |   |     |
|----|------------------------|--------------|-------------------------------------------------------------------------------------------------------------------------------|----------|----------|----------|----------|---|-----|
| B6 | GO: Cellular Component | GO:0044449   | Contractile fiber part                                                                                                        | 1.06E-06 | 6.17E-05 | 1.54E-05 | 7.17E-05 | 4 | 215 |
| B6 | GO: Cellular Component | GO:0032982   | Myosin filament                                                                                                               | 3.88E-05 | 2.25E-03 | 4.50E-04 | 2.09E-03 | 2 | 23  |
| B6 | GO: Cellular Component | GO:0016459   | Myosin complex                                                                                                                | 3.46E-04 | 2.01E-02 | 3.35E-03 | 1.56E-02 | 2 | 68  |
| B6 | GO: Cellular Component | GO:0015629   | Actin cytoskeleton                                                                                                            | 7.89E-04 | 4.58E-02 | 6.54E-03 | 3.04E-02 | 3 | 476 |
| B6 | Domain                 | PF02736      | Myosin_N                                                                                                                      | 1.67E-05 | 1.09E-03 | 2.95E-04 | 1.40E-03 | 2 | 15  |
| B6 | Domain                 | IPR004009    | Myosin_N                                                                                                                      | 1.67E-05 | 1.09E-03 | 2.95E-04 | 1.40E-03 | 2 | 15  |
| B6 | Domain                 | PF01576      | Myosin_tail_1                                                                                                                 | 2.43E-05 | 1.58E-03 | 2.95E-04 | 1.40E-03 | 2 | 18  |
| B6 | Domain                 | IPR002928    | Myosin_tail                                                                                                                   | 2.43E-05 | 1.58E-03 | 2.95E-04 | 1.40E-03 | 2 | 18  |
| B6 | Domain                 | IPR027401    | Myosin-like_IQ_dom                                                                                                            | 2.72E-05 | 1.77E-03 | 2.95E-04 | 1.40E-03 | 2 | 19  |
| B6 | Domain                 | 4.10.270.10  | -                                                                                                                             | 2.72E-05 | 1.77E-03 | 2.95E-04 | 1.40E-03 | 2 | 19  |
| B6 | Domain                 | IPR001609    | Myosin_head_motor_dom                                                                                                         | 1.11E-04 | 7.24E-03 | 7.24E-04 | 3.44E-03 | 2 | 38  |
| B6 | Domain                 | SM00242      | MYSc                                                                                                                          | 1.11E-04 | 7.24E-03 | 7.24E-04 | 3.44E-03 | 2 | 38  |
| B6 | Domain                 | PS51456      | MYOSIN_MOTOR                                                                                                                  | 1.11E-04 | 7.24E-03 | 7.24E-04 | 3.44E-03 | 2 | 38  |
| B6 | Domain                 | PF00063      | Myosin_head                                                                                                                   | 1.11E-04 | 7.24E-03 | 7.24E-04 | 3.44E-03 | 2 | 38  |
| B6 | Domain                 | IPR029531    | CAPN3                                                                                                                         | 4.27E-04 | 2.78E-02 | 2.52E-03 | 1.20E-02 | 1 | 1   |
| B6 | Domain                 | SM00015      | IQ                                                                                                                            | 5.08E-04 | 3.30E-02 | 2.75E-03 | 1.31E-02 | 2 | 81  |
| B6 | Domain                 | IPR000048    | IQ_motif_EF-hand-BS                                                                                                           | 6.27E-04 | 4.08E-02 | 3.11E-03 | 1.48E-02 | 2 | 90  |
| B6 | Domain                 | PS50096      | IQ                                                                                                                            | 6.69E-04 | 4.35E-02 | 3.11E-03 | 1.48E-02 | 2 | 93  |
| B6 | Pathway                | 1269869      | Striated Muscle Contraction                                                                                                   | 1.08E-04 | 5.50E-03 | 5.50E-03 | 2.49E-02 | 2 | 34  |
| B6 | Pathway                | 1269896      | Translocation of GLUT4 to the plasma membrane                                                                                 | 3.61E-04 | 1.84E-02 | 7.61E-03 | 3.44E-02 | 2 | 62  |
| B6 | Pathway                | P00016       | Cytoskeletal regulation by Rho GTPase                                                                                         | 4.48E-04 | 2.28E-02 | 7.61E-03 | 3.44E-02 | 2 | 69  |
| B6 | Pathway                | P00044       | Nicotinic acetylcholine receptor signaling pathway                                                                            | 7.78E-04 | 3.97E-02 | 9.92E-03 | 4.48E-02 | 2 | 91  |
| B6 | Pubmed                 | 26871637     | Widespread Expansion of Protein Interaction Capabilities by Alternative Splicing.                                             | 2.88E-05 | 1.34E-02 | 3.10E-04 | 2.08E-03 | 3 | 374 |
| B6 | Pubmed                 | 22266860     | Sp1 phosphorylation by cyclin-dependent kinase 1/cyclin B1 represses its DNA-binding activity during mitosis in cancer cells. | 3.68E-05 | 1.71E-02 | 3.10E-04 | 2.08E-03 | 2 | 54  |
| B6 | Cytoband               | 1p31-p22     | 1p31-p22                                                                                                                      | 7.79E-04 | 7.01E-03 | 7.01E-03 | 1.98E-02 | 1 | 3   |
| B6 | Cytoband               | 4q28.1       | 4q28.1                                                                                                                        | 4.15E-03 | 3.73E-02 | 1.57E-02 | 4.45E-02 | 1 | 16  |
| B6 | Gene Family            | 1098         | Myosin heavy chains                                                                                                           | 9.50E-06 | 5.70E-05 | 5.70E-05 | 1.40E-04 | 2 | 15  |
| B6 | Gene Family            | 439          | Collagen beta(1-O)galactosyltransferases                                                                                      | 6.60E-04 | 3.96E-03 | 1.98E-03 | 4.85E-03 | 1 | 2   |
| B6 | Gene Family            | 867          | Chloride channel accessory                                                                                                    | 1.32E-03 | 7.91E-03 | 1.98E-03 | 4.85E-03 | 1 | 4   |
| B6 | Gene Family            | 777          | Tropomyosins                                                                                                                  | 1.32E-03 | 7.91E-03 | 1.98E-03 | 4.85E-03 | 1 | 4   |
| B6 | Gene Family            | 975          | EF-hand domain-containing Calpains                                                                                            | 4.94E-03 | 2.96E-02 | 5.93E-03 | 1.45E-02 | 1 | 15  |
| B6 | Drug                   | CID006419303 | purealin                                                                                                                      | 1.43E-06 | 2.47E-03 | 2.47E-03 | 1.99E-02 | 3 | 58  |
| B6 | Disease                | C1850530     | Flexion contractures of joints                                                                                                | 1.00E-05 | 4.14E-03 | 1.57E-03 | 1.03E-02 | 3 | 93  |
| B6 | Disease                | C0333068     | Flexion contracture                                                                                                           | 1.04E-05 | 4.27E-03 | 1.57E-03 | 1.03E-02 | 3 | 94  |

|    |             |           |                                                                                                                                                                                        |          |          |          |          |   |     |
|----|-------------|-----------|----------------------------------------------------------------------------------------------------------------------------------------------------------------------------------------|----------|----------|----------|----------|---|-----|
| B6 | Disease     | C0009918  | Contracture of joint                                                                                                                                                                   | 1.14E-05 | 4.69E-03 | 1.57E-03 | 1.03E-02 | 3 | 97  |
| B6 | Disease     | C0546264  | Congenital Fiber Type Disproportion                                                                                                                                                    | 1.66E-05 | 6.84E-03 | 1.71E-03 | 1.13E-02 | 2 | 13  |
| B6 | Disease     | C0009917  | Contracture                                                                                                                                                                            | 2.32E-05 | 9.58E-03 | 1.92E-03 | 1.26E-02 | 3 | 123 |
| B7 | Cytoband    | 6q14.2    | 6q14.2                                                                                                                                                                                 | 1.15E-03 | 9.23E-03 | 9.23E-03 | 2.51E-02 | 1 | 5   |
| B7 | Cytoband    | 6p25      | 6p25                                                                                                                                                                                   | 3.69E-03 | 2.95E-02 | 1.13E-02 | 3.07E-02 | 1 | 16  |
| B7 | Cytoband    | 12q14.3   | 12q14.3                                                                                                                                                                                | 4.61E-03 | 3.69E-02 | 1.13E-02 | 3.07E-02 | 1 | 20  |
| B7 | Cytoband    | 1q25      | 1q25                                                                                                                                                                                   | 6.22E-03 | 4.97E-02 | 1.13E-02 | 3.07E-02 | 1 | 27  |
| B7 | Gene Family | 1072      | Alkaline phosphatases                                                                                                                                                                  | 1.10E-03 | 6.59E-03 | 4.12E-03 | 1.01E-02 | 1 | 4   |
| B7 | Gene Family | 1157      | Mitogen-activated protein kinase kinase kinases RAF family                                                                                                                             | 1.37E-03 | 8.24E-03 | 4.12E-03 | 1.01E-02 | 1 | 5   |
| B7 | Gene Family | 832       | Phospholipases C2 domain containing phospholipases                                                                                                                                     | 5.21E-03 | 3.13E-02 | 1.04E-02 | 2.55E-02 | 1 | 19  |
| B7 | Gene Family | 778       | Tubulins                                                                                                                                                                               | 7.13E-03 | 4.28E-02 | 1.07E-02 | 2.62E-02 | 1 | 26  |
| B8 | Domain      | IPR024818 | ASXL3                                                                                                                                                                                  | 1.07E-04 | 1.92E-03 | 7.21E-04 | 2.52E-03 | 1 | 1   |
| B8 | Domain      | IPR026905 | ASX-like_PHD                                                                                                                                                                           | 3.20E-04 | 5.76E-03 | 7.21E-04 | 2.52E-03 | 1 | 3   |
| B8 | Domain      | PF05066   | HARE-HTH                                                                                                                                                                               | 3.20E-04 | 5.76E-03 | 7.21E-04 | 2.52E-03 | 1 | 3   |
| B8 | Domain      | IPR007759 | HB1/Asxl_HTH                                                                                                                                                                           | 3.20E-04 | 5.76E-03 | 7.21E-04 | 2.52E-03 | 1 | 3   |
| B8 | Domain      | PF13922   | PHD_3                                                                                                                                                                                  | 3.20E-04 | 5.76E-03 | 7.21E-04 | 2.52E-03 | 1 | 3   |
| B8 | Domain      | IPR024811 | ASX/ASX-like                                                                                                                                                                           | 3.20E-04 | 5.76E-03 | 7.21E-04 | 2.52E-03 | 1 | 3   |
| B8 | Domain      | PF13919   | ASXH                                                                                                                                                                                   | 3.20E-04 | 5.76E-03 | 7.21E-04 | 2.52E-03 | 1 | 3   |
| B8 | Domain      | IPR028020 | ASXH                                                                                                                                                                                   | 3.20E-04 | 5.76E-03 | 7.21E-04 | 2.52E-03 | 1 | 3   |
| B8 | Pubmed      | 28100473  | Delineating the phenotypic spectrum of Bainbridge-Ropers syndrome: 12 new patients with de novo, heterozygous, loss-of-function mutations in ASXL3 and review of published literature. | 5.69E-05 | 1.71E-03 | 1.55E-04 | 6.20E-04 | 1 | 1   |
| B8 | Pubmed      | 15138607  | Identification and characterization of ASXL3 gene in silico.                                                                                                                           | 5.69E-05 | 1.71E-03 | 1.55E-04 | 6.20E-04 | 1 | 1   |
| B8 | Pubmed      | 27901041  | Bainbridge-Ropers syndrome caused by loss-of-function variants in ASXL3: a recognizable condition.                                                                                     | 5.69E-05 | 1.71E-03 | 1.55E-04 | 6.20E-04 | 1 | 1   |
| B8 | Pubmed      | 24044690  | De novo frameshift mutation in ASXL3 in a patient with global developmental delay, microcephaly, and craniofacial anomalies.                                                           | 5.69E-05 | 1.71E-03 | 1.55E-04 | 6.20E-04 | 1 | 1   |
| B8 | Pubmed      | 28431838  | Global developmental delay and postnatal microcephaly: Bainbridge-Ropers syndrome with a new mutation in ASXL3.                                                                        | 5.69E-05 | 1.71E-03 | 1.55E-04 | 6.20E-04 | 1 | 1   |
| B8 | Pubmed      | 25856206  | Unlike ASXL1 and ASXL2 mutations, ASXL3 mutations are rare events in acute myeloid leukemia with t(8;21).                                                                              | 5.69E-05 | 1.71E-03 | 1.55E-04 | 6.20E-04 | 1 | 1   |
| B8 | Pubmed      | 23736028  | Functional and cancer genomics of ASXL family members.                                                                                                                                 | 5.69E-05 | 1.71E-03 | 1.55E-04 | 6.20E-04 | 1 | 1   |
| B8 | Pubmed      | 10723735  | Evolution of alpha 2-fucosyltransferase genes in primates: relation between an intronic Alu-Y element and red cell expression of ABH antigens.                                         | 5.69E-05 | 1.71E-03 | 1.55E-04 | 6.20E-04 | 1 | 1   |
| B8 | Pubmed      | 27075689  | Novel splicing mutation in the ASXL3 gene causing Bainbridge-Ropers syndrome.                                                                                                          | 5.69E-05 | 1.71E-03 | 1.55E-04 | 6.20E-04 | 1 | 1   |
| B8 | Pubmed      | 23383720  | De novo truncating mutations in ASXL3 are associated with a novel clinical phenotype with similarities to Bohring-Opitz syndrome.                                                      | 5.69E-05 | 1.71E-03 | 1.55E-04 | 6.20E-04 | 1 | 1   |
| B8 | Pubmed      | 28097878  | Focusing on frequent ASXL1 mutations in myeloid                                                                                                                                        | 5.69E-05 | 1.71E-03 | 1.55E-04 | 6.20E-04 | 1 | 1   |

|    |             |             |                                                                                                                                                                                                                                    |          |          |          |          |   |     |
|----|-------------|-------------|------------------------------------------------------------------------------------------------------------------------------------------------------------------------------------------------------------------------------------|----------|----------|----------|----------|---|-----|
|    |             |             | neoplasms, and considering rarer ASXL2 and ASXL3 mutations.                                                                                                                                                                        |          |          |          |          |   |     |
| B8 | Pubmed      | 7876235     | Sequence and expression of a candidate for the human Secretor blood group alpha(1,2)fucosyltransferase gene (FUT2). Homozygosity for an enzyme-inactivating nonsense mutation commonly correlates with the non-secretor phenotype. | 1.14E-04 | 3.41E-03 | 2.27E-04 | 9.09E-04 | 1 | 2   |
| B8 | Pubmed      | 9219535     | Structure and expression of the gene encoding secretor-type galactoside 2-alpha-L-fucosyltransferase (FUT2).                                                                                                                       | 1.14E-04 | 3.41E-03 | 2.27E-04 | 9.09E-04 | 1 | 2   |
| B8 | Pubmed      | 25450400    | Repression of LXR? by a novel member of additional sex comb-like family, ASXL3.                                                                                                                                                    | 1.14E-04 | 3.41E-03 | 2.27E-04 | 9.09E-04 | 1 | 2   |
| B8 | Pubmed      | 18067503    | Sec1-FUT2-Sec1 hybrid allele generated by interlocus gene conversion.                                                                                                                                                              | 1.14E-04 | 3.41E-03 | 2.27E-04 | 9.09E-04 | 1 | 2   |
| B8 | Pubmed      | 26167880    | SR protein kinases promote splicing of nonconsensus introns.                                                                                                                                                                       | 1.39E-04 | 4.18E-03 | 2.61E-04 | 1.04E-03 | 2 | 361 |
| B8 | Pubmed      | 26647312    | De novo dominant ASXL3 mutations alter H2A deubiquitination and transcription in Bainbridge-Ropers syndrome.                                                                                                                       | 1.71E-04 | 5.12E-03 | 2.84E-04 | 1.14E-03 | 1 | 3   |
| B8 | Pubmed      | 25835095    | Functional proteomics of the epigenetic regulators ASXL1, ASXL2 and ASXL3: a convergence of proteomics and epigenetics for translational medicine.                                                                                 | 1.71E-04 | 5.12E-03 | 2.84E-04 | 1.14E-03 | 1 | 3   |
| B8 | Pubmed      | 16412590    | Characterization of Asx11, a murine homolog of Additional sex combs, and analysis of the Asx-like gene family.                                                                                                                     | 2.27E-04 | 6.82E-03 | 3.59E-04 | 1.44E-03 | 1 | 4   |
| B8 | Pubmed      | 23932459    | Genome-wide association study of lung function phenotypes in a founder population.                                                                                                                                                 | 6.82E-04 | 2.05E-02 | 1.02E-03 | 4.09E-03 | 1 | 12  |
| B8 | Pubmed      | 24941225    | Genetic variations affecting serum carcinoembryonic antigen levels and status of regional lymph nodes in patients with sporadic colorectal cancer from Southern China.                                                             | 7.39E-04 | 2.22E-02 | 1.06E-03 | 4.22E-03 | 1 | 13  |
| B8 | Interaction | int:ASXL3   | ASXL3 interactions                                                                                                                                                                                                                 | 3.51E-04 | 2.46E-03 | 1.64E-03 | 4.25E-03 | 1 | 3   |
| B8 | Interaction | int:ANKRD35 | ANKRD35 interactions                                                                                                                                                                                                               | 4.68E-04 | 3.28E-03 | 1.64E-03 | 4.25E-03 | 1 | 4   |
| B8 | Cytoband    | 18q11       | 18q11                                                                                                                                                                                                                              | 1.73E-04 | 5.19E-04 | 5.19E-04 | 9.52E-04 | 1 | 2   |
| B8 | Cytoband    | 1q21.1      | 1q21.1                                                                                                                                                                                                                             | 7.17E-03 | 2.15E-02 | 9.32E-03 | 1.71E-02 | 1 | 83  |
| B8 | Cytoband    | 19q13.33    | 19q13.33                                                                                                                                                                                                                           | 9.32E-03 | 2.80E-02 | 9.32E-03 | 1.71E-02 | 1 | 108 |
| B8 | Gene Family | 403         | Ankyrin repeat domain containing BRCA1 B complex                                                                                                                                                                                   | 1.33E-02 | 1.33E-02 | 1.33E-02 | 1.33E-02 | 1 | 242 |
| B8 | Disease     | C3809650    | BAINBRIDGE-ROPER'S SYNDROME                                                                                                                                                                                                        | 1.23E-04 | 2.35E-03 | 1.17E-03 | 4.16E-03 | 1 | 1   |
| B8 | Disease     | cv:CN180235 | Bainbridge-Ropers syndrome                                                                                                                                                                                                         | 1.23E-04 | 2.35E-03 | 1.17E-03 | 4.16E-03 | 1 | 1   |
